# Supplementary material for: The signal transducers Stat1 and Stat3 and their novel target Jmjd3 drive the expression of inflammatory genes in microglia
Source: PubMed Central journal article supplement — J Mol Med (Berl). 2013 Oct 6;92(3):239–54. doi: 10.1007/s00109-013-1090-5 (PMC3940857; doi:10.1007/s00109-013-1090-5), 2013-10-06
Supplement: 109_2013_1090_MOESM2_ESM.pdf [file 109_2013_1090_MOESM2_ESM.pdf]

| type    | seq_start | seq_end  | score | gene_stable_id     | display_label |
|---------|-----------|----------|-------|--------------------|---------------|
| P-STAT1 | 4578174   | 4578524  | 1,01  | ENSRNOG00000013351 | STXB5_RAT     |
| P-STAT1 | 7688208   | 7688677  | 0,92  | ENSRNOG00000014902 | Stx11         |
| P-STAT1 | 8687628   | 8687887  | 0,83  | ENSRNOG00000010753 | Aig1          |
| P-STAT1 | 12947295  | 12947622 | 1,01  | ENSRNOG00000012466 | Heca          |
| P-STAT1 | 14961395  | 14961645 | 1,61  | ENSRNOG00000012286 | Il20ra        |
| P-STAT1 | 21797993  | 21798550 | 1,2   | ENSRNOG00000026096 | Taar9         |
| P-STAT1 | 21827698  | 21828045 | 0,87  | ENSRNOG00000030061 | Taar8b        |
| P-STAT1 | 21968130  | 21968587 | 0,97  | ENSRNOG00000016111 | Taar7b        |
| P-STAT1 | 22008112  | 22008856 | 1,61  | ENSRNOG00000029877 | Taar4         |
| P-STAT1 | 22020267  | 22020836 | 0,97  | ENSRNOG00000025982 | Taar3         |
| P-STAT1 | 22046716  | 22047065 | 1,38  | ENSRNOG00000016073 | Taar1         |
| P-STAT1 | 22096530  | 22096819 | 0,83  | ENSRNOG00000016219 | Vnn1          |
| P-STAT1 | 22137374  | 22137940 | 0,97  | ENSRNOG00000039865 | Vnn3          |
| P-STAT1 | 22265789  | 22266319 | 0,92  | ENSRNOG00000016411 | Rps12         |
| P-STAT1 | 22265789  | 22266319 | 0,92  | ENSRNOG00000040914 | SNORD101      |
| P-STAT1 | 22265789  | 22266319 | 0,92  | ENSRNOG00000041497 | SNORD100      |
| P-STAT1 | 22265789  | 22266319 | 0,92  | ENSRNOG00000035353 | SNORA33       |
| P-STAT1 | 23291758  | 23292097 | 1,24  | ENSRNOG00000011114 | Tbpl1         |
| P-STAT1 | 29067990  | 29068339 | 1,75  | ENSRNOG00000011568 | Rspo3         |
| P-STAT1 | 29068610  | 29069345 | 0,83  | ENSRNOG00000011568 | Rspo3         |
| P-STAT1 | 29425443  | 29426072 | 1,29  | ENSRNOG00000042309 | 9330159F19R   |
| P-STAT1 | 29426453  | 29426962 | 0,97  | ENSRNOG00000042309 | 9330159F19R   |
| P-STAT1 | 29720609  | 29721396 | 1,01  | ENSRNOG00000039783 | RGD1565215    |
| P-STAT1 | 29720609  | 29721396 | 1,01  | ENSRNOG00000028357 | RGD1564978    |
| P-STAT1 | 29738908  | 29739252 | 0,92  | ENSRNOG00000012775 | Ccdc127       |
| P-STAT1 | 29738908  | 29739252 | 0,92  | ENSRNOG00000013331 | Sdha          |
| P-STAT1 | 29765858  | 29766832 | 1,06  | ENSRNOG00000014485 | Pdcd6         |
| P-STAT1 | 29894479  | 29894931 | 1,06  | ENSRNOG00000039776 | Exoc3         |
| P-STAT1 | 29972623  | 29972980 | 1,43  | ENSRNOG00000015159 | Slc9a3        |
| P-STAT1 | 29974844  | 29975210 | 1,79  | ENSRNOG00000015159 | Slc9a3        |
| P-STAT1 | 30164049  | 30164773 | 1,2   | ENSRNOG00000015676 | Brd9          |
| P-STAT1 | 30164049  | 30164773 | 1,2   | ENSRNOG00000015810 | Trip13        |
| P-STAT1 | 30491431  | 30491770 | 1,33  | ENSRNOG00000016923 | Clptm1l       |
| P-STAT1 | 34002664  | 34003108 | 0,92  | ENSRNOG00000016368 | Ppp1r14c      |
| P-STAT1 | 35140683  | 35141017 | 1,33  | ENSRNOG00000019489 | RGD1305235    |
| P-STAT1 | 35523486  | 35524331 | 1,66  | ENSRNOG00000019358 | Esr1          |
| P-STAT1 | 36268864  | 36270337 | 0,74  | ENSRNOG00000018960 | Syne1         |
| P-STAT1 | 36360407  | 36360887 | 0,92  | ENSRNOG00000018808 | Vip           |
| P-STAT1 | 36501559  | 36501911 | 1,15  | ENSRNOG00000024077 | Fbxo5         |
| P-STAT1 | 36517557  | 36517911 | 1,56  | ENSRNOG00000018773 | Mtrf1l        |
| P-STAT1 | 38097284  | 38097619 | 1,38  | ENSRNOG00000016919 | Rbm16         |
| P-STAT1 | 38706661  | 38706925 | 0,92  | ENSRNOG00000016490 | Nox3          |
| P-STAT1 | 40854740  | 40854989 | 0,97  | ENSRNOG00000018007 | Gtf2h5        |
| P-STAT1 | 40913044  | 40913302 | 1,61  | ENSRNOG00000018012 | Tulp4         |
| P-STAT1 | 41220677  | 41220915 | 0,92  | ENSRNOG00000018524 | Ezr           |
| P-STAT1 | 41393068  | 41393822 | 1,06  | ENSRNOG00000018915 | Tagap         |
| P-STAT1 | 42443887  | 42444416 | 1,33  | ENSRNOG00000016625 | Slc22a2       |
| P-STAT1 | 47141158  | 47141536 | 1,2   | ENSRNOG00000012964 | Ccr6          |

|         |          |          |      |                    |            |
|---------|----------|----------|------|--------------------|------------|
| P-STAT1 | 49439903 | 49440243 | 1,1  | ENSRNOG00000032234 | V1re5      |
| P-STAT1 | 49770639 | 49771378 | 0,83 | ENSRNOG00000013671 | Vom2r9     |
| P-STAT1 | 53094762 | 53095231 | 0,92 | ENSRNOG00000022921 | Dact2      |
| P-STAT1 | 54419022 | 54419356 | 1,15 | ENSRNOG00000001490 | Pdcd2      |
| P-STAT1 | 55919129 | 55919469 | 0,92 | ENSRNOG00000012988 | Lix1       |
| P-STAT1 | 56591316 | 56592065 | 0,83 | ENSRNOG00000011174 | Fpr1       |
| P-STAT1 | 57737842 | 57738342 | 0,92 | ENSRNOG00000011221 | V1re3      |
| P-STAT1 | 57931827 | 57932270 | 1,2  | ENSRNOG00000030707 | V1re21     |
| P-STAT1 | 58171920 | 58172358 | 0,87 | ENSRNOG00000032571 | V1re7      |
| P-STAT1 | 58782977 | 58783636 | 0,97 | ENSRNOG00000032996 | V1rf6      |
| P-STAT1 | 59833164 | 59834026 | 0,78 | ENSRNOG00000039005 | V1rf5      |
| P-STAT1 | 60140388 | 60141639 | 0,74 | ENSRNOG00000010717 | Vom2r12    |
| P-STAT1 | 60999049 | 60999691 | 0,97 | ENSRNOG00000030192 | Vom2r80    |
| P-STAT1 | 62593915 | 62594271 | 0,87 | ENSRNOG00000029034 | V1re14     |
| P-STAT1 | 63217154 | 63217493 | 1,06 | ENSRNOG00000029193 | V1re17     |
| P-STAT1 | 63485887 | 63486640 | 0,87 | ENSRNOG00000025168 | Vom2r26    |
| P-STAT1 | 63651656 | 63652210 | 0,87 | ENSRNOG00000011236 | Lilrb3     |
| P-STAT1 | 63862794 | 63863238 | 1,75 | ENSRNOG00000012816 | Leng1      |
| P-STAT1 | 63863599 | 63863940 | 1,33 | ENSRNOG00000012816 | Leng1      |
| P-STAT1 | 63899887 | 63900211 | 1,01 | ENSRNOG00000013504 | Prpf31     |
| P-STAT1 | 63899887 | 63900211 | 1,01 | ENSRNOG00000013980 | Tfpt       |
| P-STAT1 | 64754833 | 64755384 | 1,61 | ENSRNOG00000029625 | V1re12     |
| P-STAT1 | 64756828 | 64757398 | 1,47 | ENSRNOG00000029625 | V1re12     |
| P-STAT1 | 65791516 | 65791963 | 2,16 | ENSRNOG00000028859 | Olr6       |
| P-STAT1 | 65796183 | 65797162 | 0,69 | ENSRNOG00000015289 | Olr7       |
| P-STAT1 | 66190444 | 66191071 | 0,92 | ENSRNOG00000015456 | Znf787     |
| P-STAT1 | 66193507 | 66194056 | 1,06 | ENSRNOG00000015456 | Znf787     |
| P-STAT1 | 67117076 | 67117525 | 1,01 | ENSRNOG00000038666 | V1rd15     |
| P-STAT1 | 67496122 | 67497045 | 1,06 | ENSRNOG00000015753 | Epn1       |
| P-STAT1 | 67772159 | 67772792 | 0,92 | ENSRNOG00000017127 | Rpl28      |
| P-STAT1 | 67772159 | 67772792 | 0,92 | ENSRNOG00000017306 | RGD1565210 |
| P-STAT1 | 67792876 | 67793428 | 1,1  | ENSRNOG00000033173 | Fam71e2    |
| P-STAT1 | 67809529 | 67809895 | 1,38 | ENSRNOG00000038616 | Cox6b2     |
| P-STAT1 | 67933462 | 67934097 | 1,2  | ENSRNOG00000038607 | Tmem86b    |
| P-STAT1 | 68025042 | 68025615 | 0,83 | ENSRNOG00000018250 | Tnni3      |
| P-STAT1 | 68033870 | 68034424 | 1,38 | ENSRNOG00000028041 | Tnnt1      |
| P-STAT1 | 68102446 | 68102901 | 0,92 | ENSRNOG00000027919 | Rdh13      |
| P-STAT1 | 68175605 | 68175950 | 0,87 | ENSRNOG00000034260 | V1rd15     |
| P-STAT1 | 69111483 | 69112434 | 0,87 | ENSRNOG00000027843 | Kir3dl1    |
| P-STAT1 | 69170130 | 69170702 | 1,06 | ENSRNOG00000027811 | Lilrb4     |
| P-STAT1 | 71260696 | 71261185 | 1,15 | ENSRNOG00000029852 | V1rg5      |
| P-STAT1 | 71681894 | 71682228 | 1,89 | ENSRNOG00000032226 | V1rg17     |
| P-STAT1 | 71753690 | 71753924 | 0,97 | ENSRNOG00000029174 | Q7TMB2_RAT |
| P-STAT1 | 71753690 | 71753924 | 0,97 | ENSRNOG00000028882 | V1rg10     |
| P-STAT1 | 71823177 | 71823622 | 1,29 | ENSRNOG00000032817 | V1rg15     |
| P-STAT1 | 71923624 | 71924055 | 0,97 | ENSRNOG00000031210 | V1rg13     |
| P-STAT1 | 73130068 | 73130812 | 0,83 | ENSRNOG00000027704 | Vom2r35    |
| P-STAT1 | 73133433 | 73133796 | 1,15 | ENSRNOG00000027704 | Vom2r35    |
| P-STAT1 | 73985382 | 73985761 | 1,33 | ENSRNOG00000014787 | Cabp5      |

|         |          |          |      |                    |            |
|---------|----------|----------|------|--------------------|------------|
| P-STAT1 | 76256925 | 76257299 | 1,15 | ENSRNOG00000013548 | Sepw1      |
| P-STAT1 | 76256925 | 76257299 | 1,15 | ENSRNOG00000009861 | Gm4838     |
| P-STAT1 | 77141626 | 77141975 | 1,52 | ENSRNOG00000016055 | Fkrp       |
| P-STAT1 | 77220148 | 77220517 | 1,2  | ENSRNOG00000016701 | Gng8       |
| P-STAT1 | 77371571 | 77371911 | 1,33 | ENSRNOG00000016907 | Ppp5c      |
| P-STAT1 | 77527129 | 77527367 | 0,83 | ENSRNOG00000027607 | Ceacam3    |
| P-STAT1 | 77528023 | 77528463 | 1,24 | ENSRNOG00000027607 | Ceacam3    |
| P-STAT1 | 78135193 | 78135637 | 1,38 | ENSRNOG00000017721 | Psg19      |
| P-STAT1 | 78375894 | 78376149 | 1,01 | ENSRNOG00000014256 | Foxa3      |
| P-STAT1 | 78375894 | 78376149 | 1,01 | ENSRNOG00000014353 | Q561R4_RAT |
| P-STAT1 | 78509748 | 78510302 | 1,01 | ENSRNOG00000015413 | Qpctl      |
| P-STAT1 | 78509748 | 78510302 | 1,01 | ENSRNOG00000015844 | Snrpd2l    |
| P-STAT1 | 78527674 | 78528158 | 0,87 | ENSRNOG00000015860 | Gipr       |
| P-STAT1 | 78859415 | 78859776 | 1,01 | ENSRNOG00000017468 | Trappc6a   |
| P-STAT1 | 78999203 | 78999652 | 1,15 | ENSRNOG00000018426 | Apoc1      |
| P-STAT1 | 79579165 | 79579636 | 1,24 | ENSRNOG00000019427 | RGD1311676 |
| P-STAT1 | 79873653 | 79874117 | 1,15 | ENSRNOG00000024065 | Znf575     |
| P-STAT1 | 79873653 | 79874117 | 1,15 | ENSRNOG00000019982 | Ethe1      |
| P-STAT1 | 79948983 | 79950253 | 1,2  | ENSRNOG00000020057 | Tex101     |
| P-STAT1 | 80868829 | 80869563 | 1,1  | ENSRNOG00000020607 | Bckdha     |
| P-STAT1 | 80924433 | 80924962 | 1,01 | ENSRNOG00000020675 | Ccdc97     |
| P-STAT1 | 80925432 | 80925985 | 1,06 | ENSRNOG00000020675 | Ccdc97     |
| P-STAT1 | 81185163 | 81185744 | 1,01 | ENSRNOG00000027968 | Q6LCX1_RAT |
| P-STAT1 | 81688099 | 81688435 | 0,87 | ENSRNOG00000032004 | Cyp2b21    |
| P-STAT1 | 81942306 | 81942662 | 1,01 | ENSRNOG00000028900 | CP2A3_RAT  |
| P-STAT1 | 82006363 | 82006907 | 1,01 | ENSRNOG00000020928 | Cyp2a1     |
| P-STAT1 | 82256913 | 82257447 | 1,24 | ENSRNOG00000001500 | Rab4b      |
| P-STAT1 | 82256913 | 82257447 | 1,24 | ENSRNOG00000001499 | Mia        |
| P-STAT1 | 82275915 | 82276269 | 1,2  | ENSRNOG00000001501 | Snrpa      |
| P-STAT1 | 82275915 | 82276269 | 1,2  | ENSRNOG00000037715 | RGD1560854 |
| P-STAT1 | 82744540 | 82744876 | 0,87 | ENSRNOG00000018850 | Ttc9b      |
| P-STAT1 | 82747618 | 82747946 | 0,92 | ENSRNOG00000018850 | Ttc9b      |
| P-STAT1 | 83435708 | 83436333 | 1,52 | ENSRNOG00000032034 | Supt5h     |
| P-STAT1 | 83501462 | 83501807 | 0,92 | ENSRNOG00000019869 | Lrfn1      |
| P-STAT1 | 83501462 | 83501807 | 0,92 | ENSRNOG00000019702 | Med29      |
| P-STAT1 | 83501462 | 83501807 | 0,92 | ENSRNOG00000019746 | Paf1       |
| P-STAT1 | 83873555 | 83874716 | 1,75 | ENSRNOG00000020063 | Nfkbib     |
| P-STAT1 | 83873555 | 83874716 | 1,75 | ENSRNOG00000020102 | Sirt2      |
| P-STAT1 | 83988747 | 83989096 | 0,87 | ENSRNOG00000020389 | Capn12     |
| P-STAT1 | 84318910 | 84319259 | 1,01 | ENSRNOG00000037580 | Psmd8      |
| P-STAT1 | 84372064 | 84372540 | 1,24 | ENSRNOG00000020598 | Kcnk6      |
| P-STAT1 | 84372064 | 84372540 | 1,24 | ENSRNOG00000020616 | Yif1b      |
| P-STAT1 | 85253559 | 85253910 | 1,29 | ENSRNOG00000025216 | Alkbh6     |
| P-STAT1 | 85253559 | 85253910 | 1,29 | ENSRNOG00000044094 | 7SK        |
| P-STAT1 | 85610020 | 85610356 | 1,79 | ENSRNOG00000020957 | RGD1563574 |
| P-STAT1 | 85610020 | 85610356 | 1,79 | ENSRNOG00000020941 | Psenen     |
| P-STAT1 | 85610020 | 85610356 | 1,79 | ENSRNOG00000020929 | Lin37      |
| P-STAT1 | 85792514 | 85793048 | 1,15 | ENSRNOG00000021015 | Sbsn       |
| P-STAT1 | 85792514 | 85793048 | 1,15 | ENSRNOG00000021009 | Gapdhs     |

|         |          |          |      |                    |            |
|---------|----------|----------|------|--------------------|------------|
| P-STAT1 | 85980314 | 85981243 | 0,78 | ENSRNOG00000021029 | Hamp       |
| P-STAT1 | 85983656 | 85984195 | 0,87 | ENSRNOG00000021029 | Hamp       |
| P-STAT1 | 87133906 | 87134247 | 1,1  | ENSRNOG00000021137 | Kctd15     |
| P-STAT1 | 87561200 | 87561774 | 1,29 | ENSRNOG00000021144 | Cebpg      |
| P-STAT1 | 87924305 | 87925170 | 0,83 | ENSRNOG00000022393 | RGD1564719 |
| P-STAT1 | 87924305 | 87925170 | 0,83 | ENSRNOG00000012140 | B1WBZ3_RAT |
| P-STAT1 | 88202671 | 88203225 | 1,06 | ENSRNOG00000013250 | Pdcd5      |
| P-STAT1 | 88312791 | 88313340 | 1,29 | ENSRNOG00000021573 | Dpy19l3    |
| P-STAT1 | 88363555 | 88364162 | 1,2  | ENSRNOG00000013565 | Znf507     |
| P-STAT1 | 90492109 | 90492463 | 1,61 | ENSRNOG00000014463 | RGD1310358 |
| P-STAT1 | 90494156 | 90494405 | 1,52 | ENSRNOG00000014463 | RGD1310358 |
| P-STAT1 | 94195958 | 94196328 | 0,87 | ENSRNOG00000034012 | Klk12      |
| P-STAT1 | 94199399 | 94199918 | 1,24 | ENSRNOG00000018742 | Klk11      |
| P-STAT1 | 94207656 | 94208000 | 0,92 | ENSRNOG00000030281 | Klk10      |
| P-STAT1 | 94242566 | 94243032 | 0,97 | ENSRNOG00000018664 | Klk7       |
| P-STAT1 | 94320363 | 94320912 | 0,92 | ENSRNOG00000018864 | Klk4       |
| P-STAT1 | 94579187 | 94579731 | 0,97 | ENSRNOG00000032857 | Klks3      |
| P-STAT1 | 94977184 | 94977538 | 0,92 | ENSRNOG00000019532 | MGC93975   |
| P-STAT1 | 95145600 | 95146087 | 0,92 | ENSRNOG00000020014 | Myh14      |
| P-STAT1 | 95450812 | 95451261 | 1,29 | ENSRNOG00000026163 | Cpt1c      |
| P-STAT1 | 95460970 | 95461605 | 1,15 | ENSRNOG00000026109 | Prmt1      |
| P-STAT1 | 95485770 | 95486731 | 1,2  | ENSRNOG00000037247 | Rras       |
| P-STAT1 | 95598207 | 95598737 | 1,06 | ENSRNOG00000035072 | SNORD35    |
| P-STAT1 | 95598207 | 95598737 | 1,06 | ENSRNOG00000020595 | Rps11      |
| P-STAT1 | 95600679 | 95601248 | 1,29 | ENSRNOG00000035279 | SNORD33    |
| P-STAT1 | 95600679 | 95601248 | 1,29 | ENSRNOG00000036062 | SNORD34    |
| P-STAT1 | 95600679 | 95601248 | 1,29 | ENSRNOG00000035241 | SNORD35    |
| P-STAT1 | 95600679 | 95601248 | 1,29 | ENSRNOG00000020595 | Rps11      |
| P-STAT1 | 95600679 | 95601248 | 1,29 | ENSRNOG00000035072 | SNORD35    |
| P-STAT1 | 95692730 | 95693085 | 0,92 | ENSRNOG00000020686 | Dkk1       |
| P-STAT1 | 95692730 | 95693085 | 0,92 | ENSRNOG00000020695 | Tead2      |
| P-STAT1 | 95867346 | 95867793 | 0,97 | ENSRNOG00000020763 | Snrnp70    |
| P-STAT1 | 95906157 | 95906801 | 0,87 | ENSRNOG00000020793 | Ruvbl2     |
| P-STAT1 | 95906157 | 95906801 | 0,87 | ENSRNOG00000020812 | Gys1       |
| P-STAT1 | 95910223 | 95910575 | 0,87 | ENSRNOG00000020793 | Ruvbl2     |
| P-STAT1 | 95931794 | 95932428 | 1,01 | ENSRNOG00000020843 | LOC364842  |
| P-STAT1 | 95937109 | 95937468 | 1,93 | ENSRNOG00000020876 | Bax        |
| P-STAT1 | 96093433 | 96093864 | 0,92 | ENSRNOG00000021004 | Rasip1     |
| P-STAT1 | 96194366 | 96194944 | 1,01 | ENSRNOG00000021037 | Spaca4     |
| P-STAT1 | 96376437 | 96376901 | 0,92 | ENSRNOG00000021093 | Syngn4     |
| P-STAT1 | 96524110 | 96524454 | 0,92 | ENSRNOG00000028781 | Abcc6      |
| P-STAT1 | 96524110 | 96524454 | 0,92 | ENSRNOG00000021118 | Nomo1      |
| P-STAT1 | 97601574 | 97602016 | 1,89 | ENSRNOG00000013663 | Tmem86a    |
| P-STAT1 | 97758070 | 97758410 | 1,79 | ENSRNOG00000014227 | Mrga10     |
| P-STAT1 | 98075206 | 98075571 | 1,2  | ENSRNOG00000022703 | Mrgprb5    |
| P-STAT1 | 98076421 | 98076656 | 1,93 | ENSRNOG00000022703 | Mrgprb5    |
| P-STAT1 | 98613429 | 98613881 | 0,97 | ENSRNOG00000014327 | Csrp3      |
| P-STAT1 | 98614737 | 98615278 | 2,12 | ENSRNOG00000014327 | Csrp3      |
| P-STAT1 | 99445308 | 99445873 | 1,29 | ENSRNOG00000014706 | Dbx1       |

|         |           |           |      |                    |            |
|---------|-----------|-----------|------|--------------------|------------|
| P-STAT1 | 99558912  | 99559356  | 0,97 | ENSRNOG00000022189 | Htati2     |
| P-STAT1 | 107438786 | 107439121 | 1,29 | ENSRNOG00000013718 | Herc2      |
| P-STAT1 | 110171587 | 110172142 | 0,92 | ENSRNOG00000022581 | Atp10a     |
| P-STAT1 | 110174286 | 110174824 | 1,06 | ENSRNOG00000022581 | Atp10a     |
| P-STAT1 | 121145603 | 121146268 | 0,92 | ENSRNOG00000013795 | Asb7       |
| P-STAT1 | 128546428 | 128547069 | 0,97 | ENSRNOG00000012874 | Rgma       |
| P-STAT1 | 129159036 | 129159585 | 1,47 | ENSRNOG00000012031 | St8sia2    |
| P-STAT1 | 130885103 | 130885742 | 1,15 | ENSRNOG00000011160 | Sv2b       |
| P-STAT1 | 134506754 | 134507297 | 1,1  | ENSRNOG00000018531 | Mrps11     |
| P-STAT1 | 134506754 | 134507297 | 1,1  | ENSRNOG00000018547 | Mrpl46     |
| P-STAT1 | 134612962 | 134613291 | 0,97 | ENSRNOG00000018421 | Aen        |
| P-STAT1 | 134860864 | 134861213 | 1,2  | ENSRNOG00000022321 | Hapln3     |
| P-STAT1 | 135022484 | 135023036 | 1,38 | ENSRNOG00000017120 | Abhd2      |
| P-STAT1 | 135211215 | 135211559 | 1,66 | ENSRNOG00000032293 | Polg       |
| P-STAT1 | 135211215 | 135211559 | 1,66 | ENSRNOG00000037016 | Gm10616    |
| P-STAT1 | 135389489 | 135390023 | 0,92 | ENSRNOG00000015526 | Rhcg       |
| P-STAT1 | 135860440 | 135860780 | 1,06 | ENSRNOG00000014278 | Znf710     |
| P-STAT1 | 136083346 | 136083680 | 1,38 | ENSRNOG00000013149 | Vps33b     |
| P-STAT1 | 136084867 | 136085645 | 0,87 | ENSRNOG00000013149 | Vps33b     |
| P-STAT1 | 136360449 | 136360898 | 1,33 | ENSRNOG00000011213 | Blm        |
| P-STAT1 | 137099672 | 137100001 | 0,87 | ENSRNOG00000010664 | Wdr73      |
| P-STAT1 | 137099672 | 137100001 | 0,87 | ENSRNOG00000011011 | Nmb        |
| P-STAT1 | 137323146 | 137323490 | 0,87 | ENSRNOG00000018940 | Slc28a1    |
| P-STAT1 | 137416495 | 137416844 | 0,92 | ENSRNOG00000019005 | Pde8a      |
| P-STAT1 | 137934722 | 137935566 | 0,87 | ENSRNOG00000019297 | Homer2     |
| P-STAT1 | 138559601 | 138560060 | 1,2  | ENSRNOG00000010840 | Adamtsl3   |
| P-STAT1 | 138561931 | 138562465 | 0,87 | ENSRNOG00000010840 | Adamtsl3   |
| P-STAT1 | 139999178 | 139999627 | 0,87 | ENSRNOG00000011680 | Il16       |
| P-STAT1 | 140003616 | 140004250 | 1,1  | ENSRNOG00000011680 | Il16       |
| P-STAT1 | 141724764 | 141725553 | 1,01 | ENSRNOG00000030229 | Vom2r40    |
| P-STAT1 | 142293797 | 142294537 | 0,83 | ENSRNOG00000013563 | Vom2r43    |
| P-STAT1 | 142539380 | 142539816 | 1,79 | ENSRNOG00000032843 | Olr20      |
| P-STAT1 | 142711647 | 142712392 | 0,87 | ENSRNOG00000031858 | Olr24      |
| P-STAT1 | 143012012 | 143012651 | 1,01 | ENSRNOG00000013770 | Folh1      |
| P-STAT1 | 143747743 | 143748180 | 0,97 | ENSRNOG00000016421 | Tyr        |
| P-STAT1 | 144780046 | 144780694 | 0,97 | ENSRNOG00000016769 | Rab38      |
| P-STAT1 | 144782263 | 144782619 | 0,92 | ENSRNOG00000016769 | Rab38      |
| P-STAT1 | 146544341 | 146545077 | 0,87 | ENSRNOG00000017383 | LOC293103  |
| P-STAT1 | 149472217 | 149473178 | 0,92 | ENSRNOG00000009664 | Ankrd42    |
| P-STAT1 | 149655454 | 149656193 | 1,15 | ENSRNOG00000010224 | Rab30      |
| P-STAT1 | 154345323 | 154345661 | 1,06 | ENSRNOG00000011882 | Gab2       |
| P-STAT1 | 154588205 | 154588654 | 1,29 | ENSRNOG00000024793 | RGD1559529 |
| P-STAT1 | 155053357 | 155053612 | 1,06 | ENSRNOG00000029784 | Pak1       |
| P-STAT1 | 156673442 | 156674011 | 1,24 | ENSRNOG00000016831 | Serpinh1   |
| P-STAT1 | 158137817 | 158138356 | 0,92 | ENSRNOG00000018873 | Fam168a    |
| P-STAT1 | 158141069 | 158141518 | 0,97 | ENSRNOG00000018873 | Fam168a    |
| P-STAT1 | 158548309 | 158548687 | 0,87 | ENSRNOG00000019319 | Fchsd2     |
| P-STAT1 | 158816872 | 158817214 | 1,43 | ENSRNOG00000019491 | Stard10    |
| P-STAT1 | 158917637 | 158918391 | 0,92 | ENSRNOG00000019560 | Pde2a      |

|         |           |           |      |                    |            |
|---------|-----------|-----------|------|--------------------|------------|
| P-STAT1 | 159393732 | 159393996 | 0,97 | ENSRNOG00000020124 | Lrrc51     |
| P-STAT1 | 159541892 | 159542431 | 1,24 | ENSRNOG00000020175 | Rnf121     |
| P-STAT1 | 159541892 | 159542431 | 1,24 | ENSRNOG00000020188 | TRPC2_RAT  |
| P-STAT1 | 159584636 | 159584970 | 0,92 | ENSRNOG00000020251 | Art1       |
| P-STAT1 | 159595000 | 159595454 | 2,21 | ENSRNOG00000020293 | Chrna10    |
| P-STAT1 | 160145707 | 160146071 | 1,06 | ENSRNOG00000012071 | Olr41      |
| P-STAT1 | 160187027 | 160187467 | 0,92 | ENSRNOG00000018517 | Trim21     |
| P-STAT1 | 160235125 | 160235462 | 1,06 | ENSRNOG00000018508 | Olr45      |
| P-STAT1 | 160271236 | 160271780 | 1,1  | ENSRNOG00000018497 | Olr48      |
| P-STAT1 | 160272936 | 160273481 | 1,1  | ENSRNOG00000018497 | Olr48      |
| P-STAT1 | 160274426 | 160275306 | 0,83 | ENSRNOG00000018497 | Olr48      |
| P-STAT1 | 160500537 | 160500879 | 1,1  | ENSRNOG00000015432 | Olf569     |
| P-STAT1 | 160548619 | 160548879 | 0,92 | ENSRNOG00000031110 | Olr53      |
| P-STAT1 | 160603805 | 160604441 | 1,06 | ENSRNOG00000018606 | Olr59      |
| P-STAT1 | 160641036 | 160641571 | 0,97 | ENSRNOG00000031787 | Olr62      |
| P-STAT1 | 160648073 | 160648418 | 1,2  | ENSRNOG00000018551 | Olr63      |
| P-STAT1 | 160776772 | 160777119 | 1,7  | ENSRNOG00000015657 | Olr69      |
| P-STAT1 | 160788678 | 160789107 | 1,2  | ENSRNOG00000015673 | Olr70      |
| P-STAT1 | 160789563 | 160790215 | 0,92 | ENSRNOG00000015673 | Olr70      |
| P-STAT1 | 160922681 | 160923129 | 1,06 | ENSRNOG00000028970 | Olr81      |
| P-STAT1 | 160955859 | 160956328 | 1,33 | ENSRNOG00000031586 | Olr83      |
| P-STAT1 | 160970442 | 160970896 | 1,56 | ENSRNOG00000030275 | Olr84      |
| P-STAT1 | 161020247 | 161020506 | 1,01 | ENSRNOG00000021290 | Olr87      |
| P-STAT1 | 161084120 | 161084564 | 1,52 | ENSRNOG00000015811 | Olr92      |
| P-STAT1 | 161092975 | 161093524 | 0,92 | ENSRNOG00000015819 | Olr93      |
| P-STAT1 | 161099316 | 161099756 | 0,97 | ENSRNOG00000036811 | Olr94      |
| P-STAT1 | 161230364 | 161230718 | 1,79 | ENSRNOG00000015885 | Olr105     |
| P-STAT1 | 161269474 | 161269827 | 1,43 | ENSRNOG00000015909 | Olr108     |
| P-STAT1 | 161319226 | 161319592 | 1,43 | ENSRNOG00000015926 | Olr111     |
| P-STAT1 | 161347588 | 161347922 | 1,15 | ENSRNOG00000032357 | Olr114     |
| P-STAT1 | 161440486 | 161441117 | 1,06 | ENSRNOG00000031550 | Olr120     |
| P-STAT1 | 161468192 | 161468842 | 0,83 | ENSRNOG00000029978 | Olr122     |
| P-STAT1 | 161491060 | 161491707 | 0,87 | ENSRNOG00000016018 | Olr124     |
| P-STAT1 | 161641087 | 161641416 | 0,92 | ENSRNOG00000030879 | Hbg1       |
| P-STAT1 | 161654740 | 161655500 | 1,06 | ENSRNOG00000029286 | Hbe1       |
| P-STAT1 | 161771462 | 161771808 | 0,97 | ENSRNOG00000024877 | Olr136     |
| P-STAT1 | 161794582 | 161794946 | 0,87 | ENSRNOG00000034041 | Olr137     |
| P-STAT1 | 161825283 | 161825840 | 0,87 | ENSRNOG00000031147 | Olr139     |
| P-STAT1 | 161873452 | 161873981 | 0,87 | ENSRNOG00000016954 | Olr142     |
| P-STAT1 | 161875232 | 161876015 | 1,52 | ENSRNOG00000016954 | Olr142     |
| P-STAT1 | 161883644 | 161884393 | 1,29 | ENSRNOG00000016964 | Olr143     |
| P-STAT1 | 161892625 | 161893097 | 1,15 | ENSRNOG00000016979 | Olr144     |
| P-STAT1 | 161999458 | 161999792 | 1,47 | ENSRNOG00000017039 | RGD1310717 |
| P-STAT1 | 161999953 | 162000510 | 1,01 | ENSRNOG00000017039 | RGD1310717 |
| P-STAT1 | 162116679 | 162117252 | 0,87 | ENSRNOG00000017191 | RGD1304579 |
| P-STAT1 | 162202207 | 162202646 | 1,1  | ENSRNOG00000017211 | Olr152     |
| P-STAT1 | 162261512 | 162262246 | 2,35 | ENSRNOG00000017252 | Olr157     |
| P-STAT1 | 162263192 | 162263568 | 1,2  | ENSRNOG00000017252 | Olr157     |
| P-STAT1 | 162294125 | 162294479 | 0,97 | ENSRNOG00000031557 | Olr159     |

|         |           |           |      |                    |            |
|---------|-----------|-----------|------|--------------------|------------|
| P-STAT1 | 162307538 | 162308087 | 0,97 | ENSRNOG00000031490 | Olr160     |
| P-STAT1 | 162389525 | 162389986 | 1,29 | ENSRNOG00000033899 | Olr164     |
| P-STAT1 | 162421612 | 162422082 | 1,2  | ENSRNOG00000032268 | Olr165     |
| P-STAT1 | 162486072 | 162486618 | 1,01 | ENSRNOG00000029647 | Olr168     |
| P-STAT1 | 162510049 | 162510603 | 1,24 | ENSRNOG00000029375 | Olr170     |
| P-STAT1 | 162561836 | 162562305 | 1,2  | ENSRNOG00000031652 | Olr171     |
| P-STAT1 | 162618620 | 162619083 | 1,47 | ENSRNOG00000017308 | Olr175     |
| P-STAT1 | 162740013 | 162740362 | 0,87 | ENSRNOG00000033813 | Olr180     |
| P-STAT1 | 162772721 | 162773055 | 1,15 | ENSRNOG00000033534 | Olr181     |
| P-STAT1 | 162783115 | 162783454 | 1,29 | ENSRNOG00000027423 | Olr183     |
| P-STAT1 | 162786006 | 162786360 | 0,92 | ENSRNOG00000027423 | Olr183     |
| P-STAT1 | 162797676 | 162798125 | 0,97 | ENSRNOG00000017341 | Olr184     |
| P-STAT1 | 162882493 | 162882858 | 1,15 | ENSRNOG00000017366 | Olr192     |
| P-STAT1 | 162896237 | 162896586 | 0,97 | ENSRNOG00000030947 | Olr193     |
| P-STAT1 | 163085543 | 163085794 | 1,89 | ENSRNOG00000025819 | Olr202     |
| P-STAT1 | 163155083 | 163155932 | 1,7  | ENSRNOG00000017679 | Cckbr      |
| P-STAT1 | 163274692 | 163275047 | 1,2  | ENSRNOG00000017977 | Smpd1      |
| P-STAT1 | 163302273 | 163302718 | 1,33 | ENSRNOG00000018020 | Appb1      |
| P-STAT1 | 163499418 | 163499770 | 0,92 | ENSRNOG00000019212 | Tpp1       |
| P-STAT1 | 163893100 | 163893646 | 1,06 | ENSRNOG00000030881 | Olr206     |
| P-STAT1 | 163897201 | 163897565 | 0,97 | ENSRNOG00000030881 | Olr206     |
| P-STAT1 | 163930559 | 163931036 | 0,87 | ENSRNOG00000031975 | Olr208     |
| P-STAT1 | 163950836 | 163951381 | 1,01 | ENSRNOG00000033440 | Olr209     |
| P-STAT1 | 163980207 | 163980541 | 1,2  | ENSRNOG00000029365 | Olr210     |
| P-STAT1 | 164106669 | 164107138 | 1,06 | ENSRNOG00000031280 | Olr217     |
| P-STAT1 | 164225374 | 164226423 | 1,24 | ENSRNOG00000019583 | Olr223     |
| P-STAT1 | 164396374 | 164397013 | 1,2  | ENSRNOG00000030604 | Olr232     |
| P-STAT1 | 164411079 | 164411633 | 1,01 | ENSRNOG00000032071 | Olr233     |
| P-STAT1 | 164975449 | 164975895 | 0,97 | ENSRNOG00000019667 | Ppfibp2    |
| P-STAT1 | 164976631 | 164977187 | 1,29 | ENSRNOG00000019667 | Ppfibp2    |
| P-STAT1 | 165250807 | 165251302 | 0,92 | ENSRNOG00000029505 | Olr237     |
| P-STAT1 | 165409329 | 165409977 | 0,87 | ENSRNOG00000036788 | Olr244     |
| P-STAT1 | 165431435 | 165431999 | 0,92 | ENSRNOG00000030215 | Olr245     |
| P-STAT1 | 166161772 | 166162413 | 0,92 | ENSRNOG00000031496 | Olr279     |
| P-STAT1 | 166467302 | 166469472 | 1,1  | ENSRNOG00000033367 | Olr281     |
| P-STAT1 | 166548064 | 166548513 | 0,92 | ENSRNOG00000032092 | Olr285     |
| P-STAT1 | 166549059 | 166549420 | 0,97 | ENSRNOG00000032092 | Olr285     |
| P-STAT1 | 166745455 | 166745796 | 1,1  | ENSRNOG00000014629 | Lmo1       |
| P-STAT1 | 167621429 | 167622255 | 0,87 | ENSRNOG00000010752 | Tmem41b    |
| P-STAT1 | 167767466 | 167768022 | 0,87 | ENSRNOG00000010017 | Wee1       |
| P-STAT1 | 169834305 | 169834714 | 1,24 | ENSRNOG00000026754 | Usp47      |
| P-STAT1 | 169835203 | 169835656 | 1,29 | ENSRNOG00000026754 | Usp47      |
| P-STAT1 | 170230380 | 170230854 | 0,92 | ENSRNOG00000015713 | Parva      |
| P-STAT1 | 171697332 | 171697868 | 1,01 | ENSRNOG00000034303 | Spon1      |
| P-STAT1 | 172235504 | 172235851 | 1,24 | ENSRNOG00000012000 | Copb1      |
| P-STAT1 | 172773941 | 172774373 | 1,01 | ENSRNOG00000011074 | Calcb      |
| P-STAT1 | 174170236 | 174170683 | 1,06 | ENSRNOG00000020436 | RGD1311703 |
| P-STAT1 | 174538055 | 174538909 | 0,97 | ENSRNOG00000020479 | Pik3c2a    |
| P-STAT1 | 174541342 | 174541709 | 1,1  | ENSRNOG00000020479 | Pik3c2a    |

|         |           |           |      |                    |             |
|---------|-----------|-----------|------|--------------------|-------------|
| P-STAT1 | 177230693 | 177231025 | 0,87 | ENSRNOG00000016013 | Gprc5b      |
| P-STAT1 | 177726121 | 177726495 | 1,56 | ENSRNOG00000015716 | Gp2         |
| P-STAT1 | 177971982 | 177972451 | 0,92 | ENSRNOG00000014726 | Acsm4       |
| P-STAT1 | 178920246 | 178921217 | 1,15 | ENSRNOG00000043296 | RGD1561491  |
| P-STAT1 | 180198910 | 180199583 | 0,97 | ENSRNOG00000017659 | Hs3st2      |
| P-STAT1 | 180816448 | 180816994 | 0,97 | ENSRNOG00000018751 | Cog7        |
| P-STAT1 | 180849436 | 180850286 | 1,24 | ENSRNOG00000018599 | Gga2        |
| P-STAT1 | 180850885 | 180851391 | 1,43 | ENSRNOG00000018599 | Gga2        |
| P-STAT1 | 180922782 | 180923126 | 1,7  | ENSRNOG00000018129 | Ndufab1     |
| P-STAT1 | 180949681 | 180950054 | 1,38 | ENSRNOG00000018048 | Dctn5       |
| P-STAT1 | 182235632 | 182236175 | 0,92 | ENSRNOG00000013836 | RHG17_RAT   |
| P-STAT1 | 182327216 | 182327842 | 1,01 | ENSRNOG00000014652 | Aqp8        |
| P-STAT1 | 185457159 | 185457506 | 1,98 | ENSRNOG00000017429 | Lat         |
| P-STAT1 | 185506819 | 185507269 | 1,15 | ENSRNOG00000018311 | Cd19        |
| P-STAT1 | 185722587 | 185723223 | 0,92 | ENSRNOG00000017403 | Apob48r     |
| P-STAT1 | 185724575 | 185725116 | 0,87 | ENSRNOG00000019103 | Cln3        |
| P-STAT1 | 185724575 | 185725116 | 0,87 | ENSRNOG00000017403 | Apob48r     |
| P-STAT1 | 185967110 | 185967559 | 0,92 | ENSRNOG00000019813 | Ppp4c       |
| P-STAT1 | 186471718 | 186472226 | 1,15 | ENSRNOG00000017645 | Mylpf       |
| P-STAT1 | 186471718 | 186472226 | 1,15 | ENSRNOG00000017349 | Tbc1d10b    |
| P-STAT1 | 186878547 | 186878896 | 0,92 | ENSRNOG00000028771 | LOC691909   |
| P-STAT1 | 187107512 | 187108136 | 1,06 | ENSRNOG00000019193 | Stx1b       |
| P-STAT1 | 187123064 | 187123682 | 1,01 | ENSRNOG00000019302 | Stx4        |
| P-STAT1 | 187494329 | 187494773 | 1,2  | ENSRNOG00000019884 | 9130023H24F |
| P-STAT1 | 187494329 | 187494773 | 1,2  | ENSRNOG00000019935 | Armc5       |
| P-STAT1 | 189588529 | 189588858 | 1,1  | ENSRNOG00000016374 | Fgfr2       |
| P-STAT1 | 189866085 | 189866900 | 1,1  | ENSRNOG00000020452 | Nsmce4a     |
| P-STAT1 | 190916152 | 190916626 | 1,47 | ENSRNOG00000026419 | RGD1560958  |
| P-STAT1 | 190916152 | 190916626 | 1,47 | ENSRNOG00000026035 | FA24A_RAT   |
| P-STAT1 | 190949090 | 190949629 | 0,92 | ENSRNOG00000020597 | RGD1305014  |
| P-STAT1 | 193097339 | 193098270 | 1,2  | ENSRNOG00000026848 | LOC499279   |
| P-STAT1 | 193183137 | 193183396 | 0,83 | ENSRNOG00000017756 | Mmp21       |
| P-STAT1 | 193203105 | 193203549 | 1,15 | ENSRNOG00000018066 | Bccip       |
| P-STAT1 | 198699228 | 198699557 | 0,92 | ENSRNOG00000017243 | Bnip3       |
| P-STAT1 | 198861760 | 198862038 | 0,92 | ENSRNOG00000027582 | Dpysl4      |
| P-STAT1 | 199185130 | 199186011 | 1,24 | ENSRNOG00000017635 | Inpp5a      |
| P-STAT1 | 200219923 | 200220477 | 0,87 | ENSRNOG00000031903 | Olr289      |
| P-STAT1 | 200269470 | 200270039 | 1,33 | ENSRNOG00000030817 | Olr292      |
| P-STAT1 | 200399635 | 200401283 | 1,15 | ENSRNOG00000031394 | Olr299      |
| P-STAT1 | 200557663 | 200558021 | 1,24 | ENSRNOG00000029857 | Olr305      |
| P-STAT1 | 200772615 | 200773568 | 1,24 | ENSRNOG00000032181 | Olr311      |
| P-STAT1 | 200856780 | 200857263 | 1,15 | ENSRNOG00000032909 | Olr315      |
| P-STAT1 | 200917040 | 200917395 | 1,61 | ENSRNOG00000012458 | Cyp2e1      |
| P-STAT1 | 201011602 | 201012351 | 0,87 | ENSRNOG00000013256 | Ric8a       |
| P-STAT1 | 201059821 | 201060165 | 1,06 | ENSRNOG00000014656 | Cox8b       |
| P-STAT1 | 201062321 | 201062972 | 1,43 | ENSRNOG00000014656 | Cox8b       |
| P-STAT1 | 201085421 | 201085759 | 1,52 | ENSRNOG00000014685 | Nlrp6       |
| P-STAT1 | 201460510 | 201460959 | 1,33 | ENSRNOG00000017414 | Irf7        |
| P-STAT1 | 201463011 | 201463560 | 0,92 | ENSRNOG00000017414 | Irf7        |

|         |           |           |      |                    |            |
|---------|-----------|-----------|------|--------------------|------------|
| P-STAT1 | 201520714 | 201521053 | 1,1  | ENSRNOG00000018061 | Tmem80     |
| P-STAT1 | 201527102 | 201527747 | 1,06 | ENSRNOG00000017960 | Deaf1      |
| P-STAT1 | 201652391 | 201652752 | 1,06 | ENSRNOG00000019215 | Cd151      |
| P-STAT1 | 202745206 | 202746835 | 0,87 | ENSRNOG00000020332 | Tnnt3      |
| P-STAT1 | 203848036 | 203848301 | 1,89 | ENSRNOG00000020562 | S22AI_RAT  |
| P-STAT1 | 203850678 | 203851009 | 0,97 | ENSRNOG00000020562 | S22AI_RAT  |
| P-STAT1 | 204984450 | 204984909 | 0,87 | ENSRNOG00000020857 | Ppfia1     |
| P-STAT1 | 205735408 | 205736707 | 1,24 | ENSRNOG00000013387 | Tpcn2      |
| P-STAT1 | 205747539 | 205747993 | 1,2  | ENSRNOG00000013426 | Mrgprf     |
| P-STAT1 | 206367911 | 206368460 | 1,1  | ENSRNOG00000016791 | Chka       |
| P-STAT1 | 206454414 | 206454771 | 1,33 | ENSRNOG00000017512 | Aldh3b1    |
| P-STAT1 | 206567037 | 206567399 | 1,01 | ENSRNOG00000017901 | Acy3       |
| P-STAT1 | 206731822 | 206732261 | 0,87 | ENSRNOG00000032303 | RL35A_RAT  |
| P-STAT1 | 206731822 | 206732261 | 0,87 | ENSRNOG00000021828 | Coro1b     |
| P-STAT1 | 206737105 | 206737471 | 1,33 | ENSRNOG00000021724 | Ptprcap    |
| P-STAT1 | 206858209 | 206858574 | 1,06 | ENSRNOG00000018878 | Ssh3       |
| P-STAT1 | 206870935 | 206871484 | 1,2  | ENSRNOG00000028247 | Ankrd13d   |
| P-STAT1 | 207012877 | 207013146 | 0,83 | ENSRNOG00000019220 | Rhod       |
| P-STAT1 | 207452400 | 207453471 | 0,83 | ENSRNOG00000019691 | Ccs        |
| P-STAT1 | 207523866 | 207525159 | 1,56 | ENSRNOG00000019832 | Bbs1       |
| P-STAT1 | 207602147 | 207602591 | 0,92 | ENSRNOG00000020009 | Npas4      |
| P-STAT1 | 207605398 | 207605868 | 1,01 | ENSRNOG00000020009 | Npas4      |
| P-STAT1 | 207641411 | 207641845 | 1,06 | ENSRNOG00000020025 | Slc29a2    |
| P-STAT1 | 207669242 | 207669571 | 1,38 | ENSRNOG00000020133 | Rin1       |
| P-STAT1 | 207687070 | 207687644 | 1,79 | ENSRNOG00000020197 | Cd248      |
| P-STAT1 | 207996100 | 207996532 | 1,38 | ENSRNOG00000020455 | Cst6       |
| P-STAT1 | 208009105 | 208009561 | 1,15 | ENSRNOG00000020463 | Eif1ad     |
| P-STAT1 | 208009105 | 208009561 | 1,15 | ENSRNOG00000020460 | Banf1      |
| P-STAT1 | 208074630 | 208074870 | 1,1  | ENSRNOG00000020527 | Drap1      |
| P-STAT1 | 208116095 | 208116656 | 0,92 | ENSRNOG00000027096 | Ctsw       |
| P-STAT1 | 208116095 | 208116656 | 0,92 | ENSRNOG00000020587 | LOC688289  |
| P-STAT1 | 208260791 | 208261257 | 0,92 | ENSRNOG00000030888 | Rela       |
| P-STAT1 | 208352866 | 208353193 | 0,92 | ENSRNOG00000020788 | Ehbp1l1    |
| P-STAT1 | 208704034 | 208704290 | 1,33 | ENSRNOG00000020989 | Tm7sf2     |
| P-STAT1 | 208705523 | 208705882 | 1,24 | ENSRNOG00000020989 | Tm7sf2     |
| P-STAT1 | 208962572 | 208962944 | 1,01 | ENSRNOG00000028378 | LOC499306  |
| P-STAT1 | 209016257 | 209016618 | 1,7  | ENSRNOG00000021028 | Atg2a      |
| P-STAT1 | 209163874 | 209164391 | 1,15 | ENSRNOG00000021090 | Pygm       |
| P-STAT1 | 209209771 | 209210313 | 0,92 | ENSRNOG00000021103 | Nrxn2      |
| P-STAT1 | 209330353 | 209330797 | 0,92 | ENSRNOG00000021108 | Slc22a12   |
| P-STAT1 | 209589810 | 209590290 | 1,52 | ENSRNOG00000021125 | Prdx5      |
| P-STAT1 | 209599555 | 209600250 | 0,87 | ENSRNOG00000021139 | Esrra      |
| P-STAT1 | 209667826 | 209668175 | 0,97 | ENSRNOG00000043060 | Dnajc4     |
| P-STAT1 | 209667826 | 209668175 | 0,97 | ENSRNOG00000023023 | Trpt1      |
| P-STAT1 | 210062406 | 210062760 | 0,87 | ENSRNOG00000025061 | RGD1308106 |
| P-STAT1 | 210167696 | 210168032 | 0,92 | ENSRNOG00000021202 | Rtn3       |
| P-STAT1 | 210169899 | 210170328 | 0,92 | ENSRNOG00000021202 | Rtn3       |
| P-STAT1 | 210343908 | 210344261 | 1,2  | ENSRNOG00000023528 | Hrasls5    |
| P-STAT1 | 210343908 | 210344261 | 1,2  | ENSRNOG00000021207 | Lgals12    |

|         |           |           |      |                    |            |
|---------|-----------|-----------|------|--------------------|------------|
| P-STAT1 | 210345340 | 210345888 | 1,33 | ENSRNOG00000023528 | Hrasls5    |
| P-STAT1 | 210345340 | 210345888 | 1,33 | ENSRNOG00000021207 | Lgals12    |
| P-STAT1 | 210688276 | 210688615 | 0,97 | ENSRNOG00000029998 | UST4r      |
| P-STAT1 | 211267547 | 211268333 | 1,15 | ENSRNOG00000018086 | Slc22a8    |
| P-STAT1 | 211348405 | 211348745 | 0,92 | ENSRNOG00000018385 | Chrm1      |
| P-STAT1 | 211407408 | 211408368 | 0,87 | ENSRNOG00000018847 | Stx5       |
| P-STAT1 | 211425785 | 211426135 | 0,92 | ENSRNOG00000019069 | Nxf1       |
| P-STAT1 | 211459659 | 211459993 | 1,43 | ENSRNOG00000019419 | Taf6l      |
| P-STAT1 | 211461412 | 211461871 | 1,2  | ENSRNOG00000019419 | Taf6l      |
| P-STAT1 | 211557755 | 211558263 | 1,33 | ENSRNOG00000019701 | LOC690349  |
| P-STAT1 | 211559345 | 211559718 | 1,79 | ENSRNOG00000019701 | LOC690349  |
| P-STAT1 | 211559345 | 211559718 | 1,79 | ENSRNOG00000036290 | SNORA57    |
| P-STAT1 | 211567660 | 211568245 | 1,06 | ENSRNOG00000026005 | Ints5      |
| P-STAT1 | 211616052 | 211616403 | 0,97 | ENSRNOG00000019913 | Mta2       |
| P-STAT1 | 211617182 | 211617626 | 1,29 | ENSRNOG00000019913 | Mta2       |
| P-STAT1 | 211628056 | 211628603 | 0,92 | ENSRNOG00000020047 | Tut1       |
| P-STAT1 | 212161323 | 212161874 | 1,2  | ENSRNOG00000020305 | SG2A1_RAT  |
| P-STAT1 | 212296734 | 212297272 | 1,01 | ENSRNOG00000020312 | Q63464_RAT |
| P-STAT1 | 212296734 | 212297272 | 1,01 | ENSRNOG00000023151 | Scgb2a2    |
| P-STAT1 | 212470474 | 212471035 | 1,15 | ENSRNOG00000020349 | Rab3il1    |
| P-STAT1 | 212670098 | 212670437 | 1,66 | ENSRNOG00000020480 | Fads1      |
| P-STAT1 | 212790793 | 212791135 | 0,87 | ENSRNOG00000027264 | Dagla      |
| P-STAT1 | 212946294 | 212946734 | 1,38 | ENSRNOG00000030180 | RGD1564983 |
| P-STAT1 | 213337484 | 213337843 | 1,2  | ENSRNOG00000021644 | Slc15a3    |
| P-STAT1 | 213387111 | 213387560 | 0,97 | ENSRNOG00000020897 | PRP19_RAT  |
| P-STAT1 | 213389808 | 213390338 | 0,92 | ENSRNOG00000020897 | PRP19_RAT  |
| P-STAT1 | 213476489 | 213477999 | 1,29 | ENSRNOG00000020932 | Ms4a10     |
| P-STAT1 | 213824420 | 213824767 | 0,97 | ENSRNOG00000025805 | Ms4a14     |
| P-STAT1 | 213825325 | 213826659 | 0,92 | ENSRNOG00000025805 | Ms4a14     |
| P-STAT1 | 214976126 | 214976682 | 0,97 | ENSRNOG00000021072 | Olr326     |
| P-STAT1 | 215038470 | 215038904 | 1,89 | ENSRNOG00000021073 | Olr327     |
| P-STAT1 | 215239366 | 215239928 | 1,01 | ENSRNOG00000024746 | Olr332     |
| P-STAT1 | 215328434 | 215328994 | 1,15 | ENSRNOG00000021074 | Olr337     |
| P-STAT1 | 215330544 | 215330990 | 1,56 | ENSRNOG00000021074 | Olr337     |
| P-STAT1 | 215696408 | 215697066 | 0,92 | ENSRNOG00000012365 | Olr338     |
| P-STAT1 | 215844974 | 215846237 | 0,69 | ENSRNOG00000012460 | Cntf       |
| P-STAT1 | 215963304 | 215963684 | 1,52 | ENSRNOG00000043741 | snoU13     |
| P-STAT1 | 215963304 | 215963684 | 1,52 | ENSRNOG00000012838 | Olr339     |
| P-STAT1 | 215966576 | 215967141 | 1,06 | ENSRNOG00000043741 | snoU13     |
| P-STAT1 | 215966576 | 215967141 | 1,06 | ENSRNOG00000012838 | Olr339     |
| P-STAT1 | 216010071 | 216010831 | 1,01 | ENSRNOG00000032893 | Olr341     |
| P-STAT1 | 216308625 | 216309267 | 0,92 | ENSRNOG00000031830 | Olr357     |
| P-STAT1 | 216505646 | 216506600 | 1,15 | ENSRNOG00000012926 | Olr363     |
| P-STAT1 | 216913088 | 216913732 | 0,87 | ENSRNOG00000031224 | Olr378     |
| P-STAT1 | 216916783 | 216917343 | 0,92 | ENSRNOG00000031224 | Olr378     |
| P-STAT1 | 222305585 | 222306440 | 0,83 | ENSRNOG00000025644 | LOC499331  |
| P-STAT1 | 222307250 | 222307816 | 0,97 | ENSRNOG00000025644 | LOC499331  |
| P-STAT1 | 223731394 | 223731918 | 0,87 | ENSRNOG00000017619 | Aldh1a1    |
| P-STAT1 | 223874976 | 223875437 | 1,43 | ENSRNOG00000017878 | Aldh1a7    |

|         |           |           |      |                    |              |
|---------|-----------|-----------|------|--------------------|--------------|
| P-STAT1 | 226567546 | 226568886 | 0,78 | ENSRNOG00000030572 | Smc5         |
| P-STAT1 | 228095898 | 228096355 | 2,85 | ENSRNOG00000025476 | RGD1359349   |
| P-STAT1 | 228097823 | 228098463 | 1,43 | ENSRNOG00000025476 | RGD1359349   |
| P-STAT1 | 230950030 | 230950778 | 1,61 | ENSRNOG00000012574 | RGD1308750   |
| P-STAT1 | 233926393 | 233926863 | 1,06 | ENSRNOG00000011599 | Gldc         |
| P-STAT1 | 234395574 | 234396005 | 1,52 | ENSRNOG00000011692 | Dkk1         |
| P-STAT1 | 238257286 | 238257868 | 0,83 | ENSRNOG00000019142 | Fas          |
| P-STAT1 | 238258136 | 238258476 | 0,92 | ENSRNOG00000019142 | Fas          |
| P-STAT1 | 238258921 | 238259385 | 0,92 | ENSRNOG00000019142 | Fas          |
| P-STAT1 | 238460086 | 238460420 | 1,2  | ENSRNOG00000019141 | Ch25h        |
| P-STAT1 | 238556187 | 238556747 | 1,06 | ENSRNOG00000036604 | Ifit2        |
| P-STAT1 | 238558214 | 238559353 | 0,97 | ENSRNOG00000036604 | Ifit2        |
| P-STAT1 | 238559747 | 238560496 | 1,61 | ENSRNOG00000036604 | Ifit2        |
| P-STAT1 | 238567334 | 238567768 | 1,56 | ENSRNOG00000022839 | Ifit3        |
| P-STAT1 | 241646782 | 241647147 | 1,24 | ENSRNOG00000016833 | Ide          |
| P-STAT1 | 242010450 | 242010809 | 0,92 | ENSRNOG00000036601 | Exoc6        |
| P-STAT1 | 242457171 | 242457765 | 1,1  | ENSRNOG00000016593 | Pde6c        |
| P-STAT1 | 242458321 | 242458777 | 1,66 | ENSRNOG00000016593 | Pde6c        |
| P-STAT1 | 242550164 | 242550706 | 1,29 | ENSRNOG00000015235 | RGD1309482   |
| P-STAT1 | 243140096 | 243140466 | 1,2  | ENSRNOG00000013965 | Noc3l        |
| P-STAT1 | 245333340 | 245333710 | 0,92 | ENSRNOG00000021924 | Cyp2c22      |
| P-STAT1 | 245398681 | 245399015 | 0,97 | ENSRNOG00000016166 | Pdlim1       |
| P-STAT1 | 246168753 | 246169092 | 1,2  | ENSRNOG00000013967 | Blnk         |
| P-STAT1 | 246965934 | 246966881 | 0,83 | ENSRNOG00000026065 | Slit1        |
| P-STAT1 | 247074600 | 247075356 | 0,87 | ENSRNOG00000017230 | Cox15        |
| P-STAT1 | 247320004 | 247320353 | 1,01 | ENSRNOG00000016356 | Got1         |
| P-STAT1 | 248265292 | 248265919 | 1,06 | ENSRNOG00000015727 | Loxl4        |
| P-STAT1 | 248427782 | 248428133 | 1,15 | ENSRNOG00000015220 | Crtac1       |
| P-STAT1 | 248710148 | 248710817 | 0,97 | ENSRNOG00000042620 | Marveld1     |
| P-STAT1 | 248710148 | 248710817 | 0,97 | ENSRNOG00000028096 | Marveld1     |
| P-STAT1 | 248821219 | 248821888 | 1,43 | ENSRNOG00000013840 | Ankrd2       |
| P-STAT1 | 248821219 | 248821888 | 1,43 | ENSRNOG00000013813 | Ubtcd1       |
| P-STAT1 | 249353927 | 249354496 | 0,92 | ENSRNOG00000013279 | Scd          |
| P-STAT1 | 249608498 | 249608851 | 1,33 | ENSRNOG00000014234 | Hif1an       |
| P-STAT1 | 250251081 | 250251331 | 2,07 | ENSRNOG00000016120 | Tlx1         |
| P-STAT1 | 251223806 | 251224358 | 0,92 | ENSRNOG00000025523 | RGD1564887   |
| P-STAT1 | 251223806 | 251224358 | 0,92 | ENSRNOG00000018433 | Hps6<i><sup> |
| P-STAT1 | 251517297 | 251517670 | 1,66 | ENSRNOG00000019311 | Nfkb2        |
| P-STAT1 | 252030181 | 252030711 | 0,97 | ENSRNOG00000020081 | As3mt        |
| P-STAT1 | 252463002 | 252463451 | 1,06 | ENSRNOG00000020325 | Calhm2       |
| P-STAT1 | 252910549 | 252911592 | 0,69 | ENSRNOG00000020376 | Obfc1        |
| P-STAT1 | 253075885 | 253076457 | 1,24 | ENSRNOG00000012641 | RGD1305481   |
| P-STAT1 | 253075885 | 253076457 | 1,24 | ENSRNOG00000045130 | SNORA17      |
| P-STAT1 | 262736635 | 262737174 | 1,2  | ENSRNOG00000016926 | RGD1559884   |
| P-STAT1 | 263129948 | 263130407 | 0,97 | ENSRNOG00000017064 | Tdrd1        |
| P-STAT1 | 263767076 | 263767581 | 1,06 | ENSRNOG00000017321 | Trub1        |
| P-STAT1 | 265107542 | 265107896 | 1,06 | ENSRNOG00000017725 | Pnlip        |
| P-STAT1 | 265463562 | 265463924 | 1,33 | ENSRNOG00000018310 | Eno4         |
| P-STAT1 | 265886243 | 265886700 | 0,97 | ENSRNOG00000009460 | Pdzd8        |

|         |           |           |      |                    |            |
|---------|-----------|-----------|------|--------------------|------------|
| P-STAT1 | 267415591 | 267415867 | 0,83 | ENSRNOG00000010230 | Fam45a     |
| P-STAT1 | 267464441 | 267464792 | 0,92 | ENSRNOG00000036572 | Sfxn4      |
| P-STAT1 | 267886864 | 267887238 | 1,38 | ENSRNOG00000036571 | Ces2l      |
| P-STAT1 | 69192     | 69633     | 1,52 | ENSRNOG00000003198 | RGD1305733 |
| P-STAT1 | 577829    | 578873    | 0,78 | ENSRNOG00000032748 | LOC688339  |
| P-STAT1 | 4115774   | 4116118   | 1,24 | ENSRNOG00000002294 | Snx29      |
| P-STAT1 | 4245121   | 4245589   | 1,06 | ENSRNOG00000002335 | Gspt1      |
| P-STAT1 | 4807477   | 4807848   | 1,01 | ENSRNOG00000002532 | Prm1       |
| P-STAT1 | 5067974   | 5068429   | 0,97 | ENSRNOG00000002635 | Dexi       |
| P-STAT1 | 5136670   | 5137103   | 1,06 | ENSRNOG00000002659 | Ciita      |
| P-STAT1 | 10448824  | 10449266  | 1,24 | ENSRNOG00000002876 | Fam86a     |
| P-STAT1 | 10490988  | 10491312  | 1,15 | ENSRNOG00000002895 | Nagpa      |
| P-STAT1 | 10551537  | 10551965  | 1,38 | ENSRNOG00000002917 | Sec14l5    |
| P-STAT1 | 10931253  | 10931729  | 1,29 | ENSRNOG00000003773 | Hmox2      |
| P-STAT1 | 11599170  | 11599532  | 1,15 | ENSRNOG00000005330 | Crebbp     |
| P-STAT1 | 11766639  | 11766988  | 1,38 | ENSRNOG00000006873 | Dnase1     |
| P-STAT1 | 11912285  | 11912834  | 1,01 | ENSRNOG00000007280 | NAT15_RAT  |
| P-STAT1 | 11952174  | 11952730  | 0,97 | ENSRNOG00000039773 | Olr1356    |
| P-STAT1 | 12059740  | 12060093  | 1,06 | ENSRNOG00000008134 | Mefv       |
| P-STAT1 | 12475559  | 12476115  | 1,11 | ENSRNOG00000039760 | Olr1373    |
| P-STAT1 | 12613842  | 12614296  | 1,01 | ENSRNOG00000030412 | Olr1378    |
| P-STAT1 | 12754428  | 12754893  | 0,92 | ENSRNOG00000039747 | Olr1382    |
| P-STAT1 | 12868345  | 12868794  | 1,01 | ENSRNOG00000021782 | Zscan10    |
| P-STAT1 | 12924988  | 12925324  | 1,15 | ENSRNOG00000003457 | Ccdc64b    |
| P-STAT1 | 13204128  | 13204487  | 0,92 | ENSRNOG00000016026 | B2RZA7_RAT |
| P-STAT1 | 13326654  | 13327129  | 1,01 | ENSRNOG00000005607 | Kctd5      |
| P-STAT1 | 13422692  | 13423049  | 1,34 | ENSRNOG00000006542 | Atp6v0c    |
| P-STAT1 | 13459115  | 13459659  | 0,88 | ENSRNOG00000006970 | Ntn2l      |
| P-STAT1 | 13945111  | 13946184  | 1,01 | ENSRNOG00000012620 | Syngn3     |
| P-STAT1 | 13945111  | 13946184  | 1,01 | ENSRNOG00000025117 | Noxo1      |
| P-STAT1 | 14136298  | 14136965  | 1,11 | ENSRNOG00000015090 | Nubp2      |
| P-STAT1 | 14136298  | 14136965  | 1,11 | ENSRNOG00000015300 | Spsb3      |
| P-STAT1 | 14332221  | 14332560  | 0,92 | ENSRNOG00000016494 | Tmem204    |
| P-STAT1 | 14523581  | 14523932  | 0,88 | ENSRNOG00000017907 | Ube2i      |
| P-STAT1 | 14545908  | 14546357  | 0,92 | ENSRNOG00000018466 | Prss34     |
| P-STAT1 | 14596723  | 14597705  | 1,38 | ENSRNOG00000024181 | Tpsab1     |
| P-STAT1 | 14613184  | 14613621  | 1,2  | ENSRNOG00000018611 | Tpsb2      |
| P-STAT1 | 14613184  | 14613621  | 1,2  | ENSRNOG00000018701 | Tpsg1      |
| P-STAT1 | 14681596  | 14682059  | 0,92 | ENSRNOG00000033893 | Cacna1h    |
| P-STAT1 | 15059593  | 15059919  | 1,06 | ENSRNOG00000019684 | Fam173a    |
| P-STAT1 | 15586354  | 15587120  | 1,06 | ENSRNOG00000029886 | Hba-a2     |
| P-STAT1 | 15912769  | 15913237  | 0,97 | ENSRNOG00000020644 | Nsg2       |
| P-STAT1 | 17500674  | 17501210  | 0,92 | ENSRNOG00000004395 | Fbxw11     |
| P-STAT1 | 19016411  | 19016770  | 0,97 | ENSRNOG00000005620 | Lcp2       |
| P-STAT1 | 25760876  | 25761255  | 0,88 | ENSRNOG00000003225 | Nudcd2     |
| P-STAT1 | 27316566  | 27317017  | 1,48 | ENSRNOG00000003512 | Gabra1     |
| P-STAT1 | 27490827  | 27491589  | 1,43 | ENSRNOG00000003569 | Gabra6     |
| P-STAT1 | 27492607  | 27493067  | 1,06 | ENSRNOG00000003569 | Gabra6     |
| P-STAT1 | 29677267  | 29677805  | 0,92 | ENSRNOG00000004602 | Rnf145     |

|         |          |          |      |                    |            |
|---------|----------|----------|------|--------------------|------------|
| P-STAT1 | 29767488 | 29767832 | 1,66 | ENSRNOG00000028845 | Ebf1       |
| P-STAT1 | 31097641 | 31098018 | 1,01 | ENSRNOG00000005539 | Thg1l      |
| P-STAT1 | 31517026 | 31517295 | 0,92 | ENSRNOG00000006860 | Itk        |
| P-STAT1 | 31724390 | 31725340 | 0,78 | ENSRNOG00000043293 | Dppa1      |
| P-STAT1 | 31833921 | 31835474 | 0,78 | ENSRNOG00000007243 | Havcr1     |
| P-STAT1 | 34064678 | 34065034 | 1,11 | ENSRNOG00000002390 | Gnb2l1     |
| P-STAT1 | 34064678 | 34065034 | 1,11 | ENSRNOG00000034378 | SNORD95    |
| P-STAT1 | 34064678 | 34065034 | 1,11 | ENSRNOG00000044322 | SNORD96    |
| P-STAT1 | 34064678 | 34065034 | 1,11 | ENSRNOG00000035899 | SNORD95    |
| P-STAT1 | 34219738 | 34220404 | 1,2  | ENSRNOG00000033094 | Olr1383    |
| P-STAT1 | 34761497 | 34761951 | 1,06 | ENSRNOG00000029488 | Olr1389    |
| P-STAT1 | 34852088 | 34852726 | 0,88 | ENSRNOG00000031116 | Olr1393    |
| P-STAT1 | 34882462 | 34883403 | 1,52 | ENSRNOG00000031992 | Olr1395    |
| P-STAT1 | 34884843 | 34885627 | 0,97 | ENSRNOG00000031992 | Olr1395    |
| P-STAT1 | 34917818 | 34918280 | 1,2  | ENSRNOG00000029739 | Olr1397    |
| P-STAT1 | 34920928 | 34921775 | 1,2  | ENSRNOG00000029739 | Olr1397    |
| P-STAT1 | 34939627 | 34939991 | 1,61 | ENSRNOG00000031308 | Olr1398    |
| P-STAT1 | 34949566 | 34950831 | 1,57 | ENSRNOG00000034132 | Olr1399    |
| P-STAT1 | 36398176 | 36398813 | 1,24 | ENSRNOG00000029205 | Zfp354c    |
| P-STAT1 | 36532619 | 36533078 | 1,24 | ENSRNOG00000003671 | Prop1      |
| P-STAT1 | 36573128 | 36573357 | 1,43 | ENSRNOG00000034280 | Olr1407    |
| P-STAT1 | 36575478 | 36575822 | 0,97 | ENSRNOG00000034280 | Olr1407    |
| P-STAT1 | 36631571 | 36631945 | 1,11 | ENSRNOG00000032495 | Olr1411    |
| P-STAT1 | 37125141 | 37125647 | 1,06 | ENSRNOG00000003645 | Hnrnpab    |
| P-STAT1 | 37489092 | 37489571 | 1,2  | ENSRNOG00000041843 | U6         |
| P-STAT1 | 37489092 | 37489571 | 1,2  | ENSRNOG00000045432 | SNORA70    |
| P-STAT1 | 37489092 | 37489571 | 1,2  | ENSRNOG00000005024 | Cdkn2aipnl |
| P-STAT1 | 38796663 | 38797000 | 1,2  | ENSRNOG00000006965 | Aff4       |
| P-STAT1 | 38891541 | 38891921 | 0,92 | ENSRNOG00000007233 | Uqcrq      |
| P-STAT1 | 39079714 | 39080063 | 1,61 | ENSRNOG00000007624 | Il4        |
| P-STAT1 | 39164241 | 39164875 | 0,92 | ENSRNOG00000033065 | Rad50      |
| P-STAT1 | 39176720 | 39177081 | 0,92 | ENSRNOG00000008111 | Il5        |
| P-STAT1 | 40309460 | 40309915 | 2,03 | ENSRNOG00000021809 | Gpx3       |
| P-STAT1 | 40875065 | 40875417 | 1,43 | ENSRNOG00000013118 | Atox1      |
| P-STAT1 | 40875065 | 40875417 | 1,43 | ENSRNOG00000013186 | LOC500277  |
| P-STAT1 | 43427233 | 43427569 | 1,84 | ENSRNOG00000002582 | Hand1      |
| P-STAT1 | 44048415 | 44049116 | 0,83 | ENSRNOG00000038430 | LOC691277  |
| P-STAT1 | 44255215 | 44255810 | 0,92 | ENSRNOG00000029989 | Olr1418    |
| P-STAT1 | 44398039 | 44398401 | 0,88 | ENSRNOG00000031926 | Olr1425    |
| P-STAT1 | 44456824 | 44457186 | 1,98 | ENSRNOG00000031194 | Olr1431    |
| P-STAT1 | 44475345 | 44475789 | 1,52 | ENSRNOG00000038422 | LOC691352  |
| P-STAT1 | 44547117 | 44547766 | 1,29 | ENSRNOG00000038413 | Olr1433    |
| P-STAT1 | 44791750 | 44792095 | 1,11 | ENSRNOG00000030041 | Olr1443    |
| P-STAT1 | 44933420 | 44933987 | 0,92 | ENSRNOG00000031114 | Olr1451    |
| P-STAT1 | 44937043 | 44937997 | 1,2  | ENSRNOG00000031114 | Olr1451    |
| P-STAT1 | 44974259 | 44974613 | 1,57 | ENSRNOG00000029615 | Olr1453    |
| P-STAT1 | 44997411 | 44997855 | 1,43 | ENSRNOG00000030138 | Olr1455    |
| P-STAT1 | 45039107 | 45039747 | 0,88 | ENSRNOG00000030887 | Olr1457    |
| P-STAT1 | 45500028 | 45500480 | 1,2  | ENSRNOG00000002928 | Guk1       |

|         |          |          |      |                     |             |
|---------|----------|----------|------|---------------------|-------------|
| P-STAT1 | 45503821 | 45504814 | 0,74 | ENSRNOG00000002943  | Mrpl55      |
| P-STAT1 | 45751837 | 45752286 | 1,2  | ENSRNOG00000022438  | Jmjd4       |
| P-STAT1 | 45752937 | 45753391 | 1,15 | ENSRNOG00000022438  | Jmjd4       |
| P-STAT1 | 45898235 | 45898699 | 0,88 | ENSRNOG00000003210  | Olr1463     |
| P-STAT1 | 46172199 | 46172538 | 1,98 | ENSRNOG00000003332  | Nt5m        |
| P-STAT1 | 46272508 | 46273006 | 0,92 | ENSRNOG00000003341  | RGD1563669  |
| P-STAT1 | 46616152 | 46616511 | 1,43 | ENSRNOG00000003590  | Tom1l2      |
| P-STAT1 | 47071499 | 47071863 | 1,24 | ENSRNOG00000006612  | Map2k3      |
| P-STAT1 | 47881578 | 47881929 | 0,97 | ENSRNOG00000002616  | Slc5a10     |
| P-STAT1 | 48761730 | 48762095 | 0,88 | ENSRNOG00000040662  | SNORA29     |
| P-STAT1 | 48761730 | 48762095 | 0,88 | ENSRNOG00000003104  | Trpv2       |
| P-STAT1 | 48848483 | 48849369 | 0,88 | ENSRNOG00000003214  | Mmgt2       |
| P-STAT1 | 49301964 | 49302424 | 1,11 | ENSRNOG00000003338  | Pmp22       |
| P-STAT1 | 52537418 | 52537868 | 1,01 | ENSRNOG00000003981  | Znf18       |
| P-STAT1 | 53752793 | 53753258 | 0,97 | ENSRNOG00000003397  | RGD1309906  |
| P-STAT1 | 53774796 | 53775430 | 0,97 | ENSRNOG00000002987  | Myh1        |
| P-STAT1 | 54490832 | 54491181 | 0,88 | ENSRNOG00000003683  | Glp2r       |
| P-STAT1 | 54700594 | 54701043 | 1,15 | ENSRNOG000000037718 | Usp43       |
| P-STAT1 | 54700594 | 54701043 | 1,15 | ENSRNOG00000003849  | Stx8        |
| P-STAT1 | 55303438 | 55303777 | 1,71 | ENSRNOG000000037712 | Mfsd6l      |
| P-STAT1 | 55685520 | 55686254 | 1,43 | ENSRNOG00000004225  | Odf4        |
| P-STAT1 | 55813235 | 55813679 | 1,06 | ENSRNOG00000006513  | LOC497934   |
| P-STAT1 | 55813235 | 55813679 | 1,06 | ENSRNOG000000037672 | 9330160F10R |
| P-STAT1 | 55963018 | 55963448 | 0,88 | ENSRNOG000000007778 | Alox15b     |
| P-STAT1 | 56115354 | 56115816 | 0,97 | ENSRNOG000000008480 | Kcnab3      |
| P-STAT1 | 56115354 | 56115816 | 0,97 | ENSRNOG000000037627 | Trappc1     |
| P-STAT1 | 56115354 | 56115816 | 0,97 | ENSRNOG000000008270 | Cntrob      |
| P-STAT1 | 56129867 | 56130210 | 1,11 | ENSRNOG000000021540 | RGD1563441  |
| P-STAT1 | 56195988 | 56196436 | 1,15 | ENSRNOG000000009870 | Tmem88      |
| P-STAT1 | 56204566 | 56205094 | 0,88 | ENSRNOG000000037613 | Jmjd3       |
| P-STAT1 | 56480493 | 56481042 | 0,88 | ENSRNOG000000012162 | Mpdu1       |
| P-STAT1 | 56486092 | 56486428 | 1,11 | ENSRNOG000000045258 | SNORA48     |
| P-STAT1 | 56486092 | 56486428 | 1,11 | ENSRNOG000000043626 | snoU6-77    |
| P-STAT1 | 56486092 | 56486428 | 1,11 | ENSRNOG000000036169 | SNORA67     |
| P-STAT1 | 56486092 | 56486428 | 1,11 | ENSRNOG000000037563 | Cd68        |
| P-STAT1 | 56758185 | 56758733 | 1,29 | ENSRNOG000000016360 | Gps2        |
| P-STAT1 | 56793988 | 56794460 | 1,06 | ENSRNOG000000017226 | Slc2a4      |
| P-STAT1 | 56793988 | 56794460 | 1,06 | ENSRNOG000000027649 | RGD1560902  |
| P-STAT1 | 56862727 | 56863761 | 1,43 | ENSRNOG000000018114 | Acadvl      |
| P-STAT1 | 56862727 | 56863761 | 1,43 | ENSRNOG000000018526 | Dlg4        |
| P-STAT1 | 57050253 | 57050597 | 1,15 | ENSRNOG000000018748 | B5DFC0_RAT  |
| P-STAT1 | 57062734 | 57063283 | 1,06 | ENSRNOG000000018785 | Slc16a13    |
| P-STAT1 | 57068082 | 57068526 | 1,38 | ENSRNOG000000018811 | Bcl6b       |
| P-STAT1 | 57094008 | 57094388 | 0,97 | ENSRNOG000000027037 | Alox12      |
| P-STAT1 | 57168117 | 57168486 | 1,11 | ENSRNOG000000019074 | Alox12e     |
| P-STAT1 | 57495120 | 57495474 | 0,88 | ENSRNOG000000042847 | LOC687707   |
| P-STAT1 | 57524151 | 57524695 | 0,92 | ENSRNOG000000003879 | Rnf167      |
| P-STAT1 | 57551255 | 57551884 | 0,88 | ENSRNOG000000004246 | Spag7       |
| P-STAT1 | 57570113 | 57570937 | 1,06 | ENSRNOG000000004283 | Camta2      |

|         |          |          |      |                    |            |
|---------|----------|----------|------|--------------------|------------|
| P-STAT1 | 57658027 | 57658371 | 1,06 | ENSRNOG00000005009 | Zfp3       |
| P-STAT1 | 57744957 | 57745494 | 1,01 | ENSRNOG00000005015 | Rabep1     |
| P-STAT1 | 57926937 | 57927386 | 0,88 | ENSRNOG00000007725 | Mis12      |
| P-STAT1 | 57942598 | 57942964 | 0,88 | ENSRNOG00000007731 | LOC691995  |
| P-STAT1 | 59097299 | 59097658 | 0,88 | ENSRNOG00000014072 | Txndc17    |
| P-STAT1 | 59100212 | 59100657 | 0,92 | ENSRNOG00000014072 | Txndc17    |
| P-STAT1 | 59100212 | 59100657 | 0,92 | ENSRNOG00000014027 | RGD1304728 |
| P-STAT1 | 59199423 | 59199767 | 0,92 | ENSRNOG00000014953 | Fbxo39     |
| P-STAT1 | 59324348 | 59324684 | 1,43 | ENSRNOG00000015236 | Mybbp1a    |
| P-STAT1 | 59378353 | 59378712 | 0,92 | ENSRNOG00000015801 | Spns2      |
| P-STAT1 | 59935677 | 59936661 | 0,83 | ENSRNOG00000018550 | RGD1308139 |
| P-STAT1 | 60074102 | 60074538 | 1,11 | ENSRNOG00000028688 | Ctns       |
| P-STAT1 | 60074102 | 60074538 | 1,11 | ENSRNOG00000019458 | Shpk       |
| P-STAT1 | 60107097 | 60107531 | 1,34 | ENSRNOG00000019486 | Trpv1      |
| P-STAT1 | 60232512 | 60232864 | 1,11 | ENSRNOG00000031835 | Olr1466    |
| P-STAT1 | 60422842 | 60423442 | 1,06 | ENSRNOG00000032736 | Olr1474    |
| P-STAT1 | 60714804 | 60715253 | 1,43 | ENSRNOG00000033558 | Olr1486    |
| P-STAT1 | 61006182 | 61006636 | 1,01 | ENSRNOG00000031337 | Olr1498    |
| P-STAT1 | 61159129 | 61159709 | 1,01 | ENSRNOG00000031966 | Olr1501    |
| P-STAT1 | 61307216 | 61307647 | 2,12 | ENSRNOG00000019898 | Olr1507    |
| P-STAT1 | 61309746 | 61310095 | 1,15 | ENSRNOG00000019898 | Olr1507    |
| P-STAT1 | 61386423 | 61386967 | 1,2  | ENSRNOG00000027806 | Olr1509    |
| P-STAT1 | 61496025 | 61496387 | 0,92 | ENSRNOG00000033267 | Olr1514    |
| P-STAT1 | 61659171 | 61659512 | 1,06 | ENSRNOG00000033701 | Olr1520    |
| P-STAT1 | 62238195 | 62238550 | 1,2  | ENSRNOG00000002991 | Srr        |
| P-STAT1 | 62656412 | 62656854 | 1,06 | ENSRNOG00000003123 | Rpa1       |
| P-STAT1 | 64077385 | 64077736 | 1,34 | ENSRNOG00000009681 | Flot2      |
| P-STAT1 | 64332722 | 64333056 | 1,75 | ENSRNOG00000011777 | Q9QY92_RAT |
| P-STAT1 | 64455306 | 64455671 | 2,17 | ENSRNOG00000012866 | Nek8       |
| P-STAT1 | 64460828 | 64461078 | 1,34 | ENSRNOG00000012579 | Tlcd1      |
| P-STAT1 | 64530562 | 64531012 | 0,88 | ENSRNOG00000010337 | Slc13a2    |
| P-STAT1 | 64605838 | 64606207 | 1,11 | ENSRNOG00000010031 | Q7TQ11_RAT |
| P-STAT1 | 65079363 | 65079794 | 1,06 | ENSRNOG00000012557 | Lgals5     |
| P-STAT1 | 66657089 | 66657445 | 1,43 | ENSRNOG00000014496 | Coro6      |
| P-STAT1 | 67325680 | 67326119 | 1,24 | ENSRNOG00000003873 | Cpd        |
| P-STAT1 | 67405082 | 67405506 | 1,24 | ENSRNOG00000003971 | Gosr1      |
| P-STAT1 | 68716624 | 68716883 | 0,83 | ENSRNOG00000021685 | Cdk5r1     |
| P-STAT1 | 69024364 | 69024724 | 1,61 | ENSRNOG00000021316 | Tmem98     |
| P-STAT1 | 71553252 | 71553581 | 0,88 | ENSRNOG00000010604 | Taf15      |
| P-STAT1 | 71610533 | 71610979 | 1,29 | ENSRNOG00000010906 | Ccl5       |
| P-STAT1 | 71652369 | 71652794 | 1,98 | ENSRNOG00000028548 | Ccl9       |
| P-STAT1 | 71652969 | 71653623 | 1,24 | ENSRNOG00000028548 | Ccl9       |
| P-STAT1 | 71667009 | 71667438 | 1,15 | ENSRNOG00000030021 | Ccl6       |
| P-STAT1 | 71747581 | 71747950 | 1,11 | ENSRNOG00000011205 | Ccl3       |
| P-STAT1 | 71965672 | 71966138 | 0,88 | ENSRNOG00000029668 | LOC360228  |
| P-STAT1 | 71967926 | 71968470 | 1,71 | ENSRNOG00000029668 | LOC360228  |
| P-STAT1 | 71969861 | 71970413 | 1,01 | ENSRNOG00000029668 | LOC360228  |
| P-STAT1 | 72245779 | 72246324 | 0,88 | ENSRNOG00000000242 | Synrg      |
| P-STAT1 | 72795625 | 72796500 | 0,92 | ENSRNOG00000002778 | Aatf       |

|         |          |          |      |                     |            |
|---------|----------|----------|------|---------------------|------------|
| P-STAT1 | 72804843 | 72805288 | 0,92 | ENSRNOG00000002812  | Lhx1       |
| P-STAT1 | 73157689 | 73158238 | 1,2  | ENSRNOG00000027857  | Pigw       |
| P-STAT1 | 73377074 | 73377619 | 0,92 | ENSRNOG00000027711  | Usp32      |
| P-STAT1 | 73571625 | 73572467 | 1,06 | ENSRNOG00000003329  | Ppm1d      |
| P-STAT1 | 75721603 | 75721959 | 1,06 | ENSRNOG00000006661  | Rad51c     |
| P-STAT1 | 76026748 | 76027087 | 1,98 | ENSRNOG00000007845  | Supt4h1    |
| P-STAT1 | 76028148 | 76028689 | 1,24 | ENSRNOG00000007845  | Supt4h1    |
| P-STAT1 | 76031175 | 76031557 | 0,92 | ENSRNOG00000007845  | Supt4h1    |
| P-STAT1 | 76173120 | 76173679 | 1,11 | ENSRNOG00000008707  | Epx        |
| P-STAT1 | 76500963 | 76501392 | 1,11 | ENSRNOG00000010363  | Mrps23     |
| P-STAT1 | 77280616 | 77281033 | 1,34 | ENSRNOG00000002373  | Akap1      |
| P-STAT1 | 77434651 | 77435480 | 0,83 | ENSRNOG00000000244  | Coil       |
| P-STAT1 | 77536165 | 77536708 | 0,88 | ENSRNOG00000002338  | Q2YDU7_RAT |
| P-STAT1 | 78424026 | 78424357 | 1,24 | ENSRNOG00000002425  | Pctp       |
| P-STAT1 | 78424730 | 78425090 | 1,8  | ENSRNOG00000002425  | Pctp       |
| P-STAT1 | 78443434 | 78443773 | 1,11 | ENSRNOG00000002434  | Tmem100    |
| P-STAT1 | 78662717 | 78663095 | 0,92 | ENSRNOG00000002436  | Mmd        |
| P-STAT1 | 79037871 | 79038639 | 1,34 | ENSRNOG000000032768 | Stxbp4     |
| P-STAT1 | 79037871 | 79038639 | 1,34 | ENSRNOG00000002458  | Cox11      |
| P-STAT1 | 82852821 | 82853173 | 0,88 | ENSRNOG00000002828  | Tob1       |
| P-STAT1 | 82970417 | 82971176 | 1,89 | ENSRNOG00000002835  | Luc7l3     |
| P-STAT1 | 83201887 | 83202436 | 1,06 | ENSRNOG00000003304  | Chad       |
| P-STAT1 | 83798328 | 83798772 | 1,8  | ENSRNOG00000004278  | Dlx3       |
| P-STAT1 | 84068308 | 84068650 | 1,01 | ENSRNOG00000004510  | Slc35b1    |
| P-STAT1 | 84281754 | 84282508 | 1,52 | ENSRNOG00000005392  | Ngfr       |
| P-STAT1 | 84790463 | 84791310 | 1,11 | ENSRNOG00000007235  | Atp5g1     |
| P-STAT1 | 85769354 | 85769698 | 0,88 | ENSRNOG00000009473  | Osbpl7     |
| P-STAT1 | 85868640 | 85868898 | 1,15 | ENSRNOG00000009370  | Tbkbp1     |
| P-STAT1 | 86013850 | 86014199 | 1,66 | ENSRNOG00000023095  | Npepps     |
| P-STAT1 | 86043062 | 86043428 | 0,92 | ENSRNOG00000010540  | Mrpl45     |
| P-STAT1 | 86324258 | 86324852 | 0,92 | ENSRNOG00000011475  | Snip       |
| P-STAT1 | 86443601 | 86444372 | 0,97 | ENSRNOG00000012705  | Pcgf2      |
| P-STAT1 | 86548346 | 86548960 | 0,88 | ENSRNOG00000004132  | LASP1_RAT  |
| P-STAT1 | 86969097 | 86969467 | 1,01 | ENSRNOG00000006000  | CDK12_RAT  |
| P-STAT1 | 86972680 | 86973132 | 1,34 | ENSRNOG00000006000  | CDK12_RAT  |
| P-STAT1 | 87039521 | 87039873 | 1,01 | ENSRNOG00000028430  | LOC257650  |
| P-STAT1 | 87121374 | 87121831 | 0,92 | ENSRNOG00000028404  | Ppp1r1b    |
| P-STAT1 | 87214894 | 87215148 | 0,83 | ENSRNOG00000006450  | Erbp2      |
| P-STAT1 | 87245064 | 87245420 | 1,01 | ENSRNOG00000007227  | RGD1306682 |
| P-STAT1 | 87410005 | 87410344 | 0,92 | ENSRNOG00000030445  | Ormdl3     |
| P-STAT1 | 87522083 | 87522547 | 1,01 | ENSRNOG00000009066  | Thra       |
| P-STAT1 | 87565975 | 87567031 | 1,34 | ENSRNOG00000009643  | Msl1       |
| P-STAT1 | 87819160 | 87819621 | 1,06 | ENSRNOG00000010635  | Igfbp4     |
| P-STAT1 | 87867641 | 87867880 | 1,01 | ENSRNOG00000027350  | Tns4       |
| P-STAT1 | 88244474 | 88244915 | 1,01 | ENSRNOG00000033617  | Krt26      |
| P-STAT1 | 88330966 | 88331338 | 0,97 | ENSRNOG00000011986  | Krt12      |
| P-STAT1 | 88488504 | 88488963 | 1,43 | ENSRNOG00000013896  | Krt40      |
| P-STAT1 | 88836465 | 88837017 | 1,43 | ENSRNOG00000042701  | LOC680428  |
| P-STAT1 | 88947931 | 88948372 | 1,15 | ENSRNOG00000013071  | Krt33a     |

|         |           |           |      |                    |            |
|---------|-----------|-----------|------|--------------------|------------|
| P-STAT1 | 89024997  | 89025341  | 0,97 | ENSRNOG00000013611 | Krt32      |
| P-STAT1 | 89044124  | 89044562  | 0,92 | ENSRNOG00000031805 | Krt1-5     |
| P-STAT1 | 89060898  | 89061237  | 1,61 | ENSRNOG00000014070 | Krt13      |
| P-STAT1 | 89251624  | 89252168  | 0,88 | ENSRNOG00000033765 | LOC680027  |
| P-STAT1 | 89272891  | 89273243  | 1,01 | ENSRNOG00000014740 | Gast       |
| P-STAT1 | 89419934  | 89420703  | 1,52 | ENSRNOG00000016921 | Klhl11     |
| P-STAT1 | 89677489  | 89677833  | 1,52 | ENSRNOG00000018568 | Rab5c      |
| P-STAT1 | 89793202  | 89793748  | 0,97 | ENSRNOG00000019496 | Stat5a     |
| P-STAT1 | 89876801  | 89877260  | 1,71 | ENSRNOG00000019742 | Stat3      |
| P-STAT1 | 89905923  | 89906357  | 1,2  | ENSRNOG00000019778 | Ptrf       |
| P-STAT1 | 90101327  | 90101861  | 1,24 | ENSRNOG00000019983 | Mlx        |
| P-STAT1 | 90273528  | 90274280  | 0,97 | ENSRNOG00000020415 | Ramp2      |
| P-STAT1 | 90475398  | 90475949  | 1,2  | ENSRNOG00000020678 | Ifi35      |
| P-STAT1 | 90768084  | 90768513  | 1,01 | ENSRNOG00000020772 | Dhx8       |
| P-STAT1 | 91041235  | 91041876  | 0,97 | ENSRNOG00000036796 | RGD1565533 |
| P-STAT1 | 91168456  | 91169406  | 0,97 | ENSRNOG00000020874 | Ppy        |
| P-STAT1 | 91514254  | 91514618  | 1,43 | ENSRNOG00000020994 | Slc25a39   |
| P-STAT1 | 92008034  | 92008468  | 1,38 | ENSRNOG00000002814 | Higd1b     |
| P-STAT1 | 92055461  | 92056300  | 0,88 | ENSRNOG00000002918 | RGD1307851 |
| P-STAT1 | 92118636  | 92119199  | 0,88 | ENSRNOG00000002963 | C1ql1      |
| P-STAT1 | 92340542  | 92340900  | 1,2  | ENSRNOG00000003207 | Fmn11      |
| P-STAT1 | 92793444  | 92793999  | 1,11 | ENSRNOG00000003501 | Lyz16      |
| P-STAT1 | 93407592  | 93407916  | 1,48 | ENSRNOG00000005133 | Mapt       |
| P-STAT1 | 95357078  | 95357442  | 0,92 | ENSRNOG00000007467 | Ace        |
| P-STAT1 | 95647318  | 95647687  | 1,2  | ENSRNOG00000010038 | Psmc5      |
| P-STAT1 | 95763625  | 95764070  | 1,38 | ENSRNOG00000012134 | Scn4a      |
| P-STAT1 | 96110894  | 96111493  | 1,11 | ENSRNOG00000042524 | Mca32      |
| P-STAT1 | 97620585  | 97621046  | 1,52 | ENSRNOG00000003491 | Prkca      |
| P-STAT1 | 97621695  | 97622057  | 1,11 | ENSRNOG00000003491 | Prkca      |
| P-STAT1 | 99173994  | 99174634  | 1,38 | ENSRNOG00000003969 | Fam20a     |
| P-STAT1 | 99277969  | 99278513  | 1,43 | ENSRNOG00000024233 | RGD1559578 |
| P-STAT1 | 100511557 | 100511901 | 1,06 | ENSRNOG00000004713 | Kcnj16     |
| P-STAT1 | 100575077 | 100575426 | 1,57 | ENSRNOG00000004720 | Kcnj2      |
| P-STAT1 | 103192354 | 103192788 | 1,24 | ENSRNOG00000031213 | Slc39a11   |
| P-STAT1 | 103310035 | 103310615 | 0,88 | ENSRNOG00000024780 | MGC95210   |
| P-STAT1 | 104545012 | 104545740 | 0,88 | ENSRNOG00000036729 | Rpl38      |
| P-STAT1 | 105207952 | 105208646 | 1,06 | ENSRNOG00000021424 | Cd300lf    |
| P-STAT1 | 105396216 | 105396580 | 1,2  | ENSRNOG00000028121 | Otop2      |
| P-STAT1 | 105619717 | 105620076 | 1,24 | ENSRNOG00000003670 | RGD1559917 |
| P-STAT1 | 105621963 | 105622419 | 1,2  | ENSRNOG00000003670 | RGD1559917 |
| P-STAT1 | 105819578 | 105820217 | 1,11 | ENSRNOG00000003990 | Grb2       |
| P-STAT1 | 106246485 | 106246935 | 1,06 | ENSRNOG00000008256 | Mrpl38     |
| P-STAT1 | 106387414 | 106387899 | 1,29 | ENSRNOG00000009351 | Srp68      |
| P-STAT1 | 106814343 | 106814679 | 1,43 | ENSRNOG00000012083 | St6galnac2 |
| P-STAT1 | 106944821 | 106945165 | 1,01 | ENSRNOG00000000249 | RGD1306284 |
| P-STAT1 | 106946113 | 106946545 | 1,01 | ENSRNOG00000000249 | RGD1306284 |
| P-STAT1 | 108129900 | 108130950 | 1,52 | ENSRNOG00000003028 | P70571_RAT |
| P-STAT1 | 108399889 | 108400348 | 1,24 | ENSRNOG00000003217 | Lgals3bp   |
| P-STAT1 | 109315594 | 109316255 | 0,83 | ENSRNOG00000004014 | Chmp6      |

|         |           |           |      |                     |            |
|---------|-----------|-----------|------|---------------------|------------|
| P-STAT1 | 109347743 | 109348193 | 1,52 | ENSRNOG00000004049  | Baiap2     |
| P-STAT1 | 109944051 | 109944290 | 0,88 | ENSRNOG000000036690 | Dysfip1    |
| P-STAT1 | 109984245 | 109984692 | 1,06 | ENSRNOG000000036686 | Anapc11    |
| P-STAT1 | 109990093 | 109990668 | 1,57 | ENSRNOG000000036687 | Thoc4      |
| P-STAT1 | 110020172 | 110020511 | 1,34 | ENSRNOG000000036683 | Sirt7      |
| P-STAT1 | 110020172 | 110020511 | 1,34 | ENSRNOG000000036697 | Mafg       |
| P-STAT1 | 110057451 | 110058310 | 1,11 | ENSRNOG000000036680 | RGD1307119 |
| P-STAT1 | 110282348 | 110282801 | 0,92 | ENSRNOG000000036673 | Sectm1b    |
| P-STAT1 | 110373935 | 110374284 | 1,01 | ENSRNOG000000036670 | Tex19.1    |
| P-STAT1 | 110392101 | 110392628 | 0,97 | ENSRNOG000000036669 | Uts2r      |
| P-STAT1 | 2955933   | 2956385   | 1,07 | ENSRNOG00000000715  | Q6P7Q7_RAT |
| P-STAT1 | 15800223  | 15800650  | 1,12 | ENSRNOG00000001573  | Usp25      |
| P-STAT1 | 17991052  | 17991328  | 0,98 | ENSRNOG00000001915  | Chodl      |
| P-STAT1 | 18169230  | 18169586  | 0,98 | ENSRNOG00000001916  | Prss7      |
| P-STAT1 | 24311453  | 24311813  | 1,12 | ENSRNOG000000042848 | Jam2       |
| P-STAT1 | 25158407  | 25158736  | 1,07 | ENSRNOG00000001544  | Cyyr1      |
| P-STAT1 | 25158407  | 25158736  | 1,07 | ENSRNOG000000035800 | U6         |
| P-STAT1 | 27313582  | 27314120  | 1,02 | ENSRNOG00000001584  | LOC304131  |
| P-STAT1 | 27464583  | 27464930  | 1,07 | ENSRNOG00000001582  | Bach1      |
| P-STAT1 | 29298143  | 29299007  | 1,25 | ENSRNOG000000043017 | Krtap7-1   |
| P-STAT1 | 30711238  | 30711776  | 1,67 | ENSRNOG000000021555 | RGD1310778 |
| P-STAT1 | 30712691  | 30713206  | 0,93 | ENSRNOG000000021555 | RGD1310778 |
| P-STAT1 | 31001435  | 31001987  | 1,02 | ENSRNOG000000002051 | Synj1      |
| P-STAT1 | 31059096  | 31059570  | 1,25 | ENSRNOG000000028670 | RGD1562726 |
| P-STAT1 | 31451626  | 31452128  | 0,98 | ENSRNOG000000028594 | Ifnar1     |
| P-STAT1 | 31718893  | 31719334  | 1,07 | ENSRNOG00000002001  | Itsn1      |
| P-STAT1 | 33909689  | 33909944  | 0,84 | ENSRNOG00000001701  | Cbr3       |
| P-STAT1 | 34060477  | 34060947  | 1,07 | ENSRNOG000000026236 | Morc3      |
| P-STAT1 | 34109789  | 34110139  | 1,07 | ENSRNOG00000001692  | Chaf1b     |
| P-STAT1 | 34615162  | 34615611  | 1,12 | ENSRNOG00000001682  | Ttc3       |
| P-STAT1 | 34805973  | 34806422  | 0,93 | ENSRNOG00000001681  | Dscr3      |
| P-STAT1 | 34878910  | 34879458  | 0,93 | ENSRNOG00000001662  | Dyrk1a     |
| P-STAT1 | 36451195  | 36452449  | 1,25 | ENSRNOG00000001629  | Wrb        |
| P-STAT1 | 36697047  | 36697386  | 1,72 | ENSRNOG000000028216 | LOC304000  |
| P-STAT1 | 36698329  | 36698886  | 1,02 | ENSRNOG000000028216 | LOC304000  |
| P-STAT1 | 37461416  | 37461760  | 0,88 | ENSRNOG00000001959  | Mx1        |
| P-STAT1 | 37620557  | 37621370  | 1,16 | ENSRNOG00000001976  | Tmprss2    |
| P-STAT1 | 37867689  | 37868038  | 1,02 | ENSRNOG00000001620  | Prdm15     |
| P-STAT1 | 41935401  | 41935755  | 0,98 | ENSRNOG000000039707 | Olr1536    |
| P-STAT1 | 41967430  | 41968718  | 1,02 | ENSRNOG000000039704 | Olr1538    |
| P-STAT1 | 42031306  | 42031859  | 1,02 | ENSRNOG000000039702 | Olr1540    |
| P-STAT1 | 42059630  | 42060092  | 1,12 | ENSRNOG000000039701 | Olr1542    |
| P-STAT1 | 42165787  | 42166748  | 0,88 | ENSRNOG000000039696 | Olr1547    |
| P-STAT1 | 42222529  | 42223217  | 1,21 | ENSRNOG000000032020 | Olr1551    |
| P-STAT1 | 42262553  | 42262907  | 1,63 | ENSRNOG000000039688 | Olr1553    |
| P-STAT1 | 42297033  | 42297680  | 1,58 | ENSRNOG000000039687 | Olr1555    |
| P-STAT1 | 42319998  | 42320949  | 1,53 | ENSRNOG000000039686 | Olr1557    |
| P-STAT1 | 42323847  | 42324411  | 1,02 | ENSRNOG000000039686 | Olr1557    |
| P-STAT1 | 42405176  | 42405630  | 1,16 | ENSRNOG000000033144 | Olr1559    |

|         |          |          |      |                    |            |
|---------|----------|----------|------|--------------------|------------|
| P-STAT1 | 42759437 | 42759866 | 0,98 | ENSRNOG00000001654 | Cpox       |
| P-STAT1 | 45385257 | 45385821 | 0,84 | ENSRNOG00000001622 | Impg2      |
| P-STAT1 | 49855817 | 49856346 | 0,88 | ENSRNOG00000001982 | Cblb       |
| P-STAT1 | 49859828 | 49860374 | 0,88 | ENSRNOG00000001982 | Cblb       |
| P-STAT1 | 53205794 | 53207046 | 1,58 | ENSRNOG00000001955 | Retnla     |
| P-STAT1 | 56179513 | 56180690 | 1,21 | ENSRNOG00000023030 | Cd96       |
| P-STAT1 | 56583425 | 56583781 | 0,88 | ENSRNOG00000002151 | TAGL3_RAT  |
| P-STAT1 | 56586270 | 56586606 | 0,98 | ENSRNOG00000002151 | TAGL3_RAT  |
| P-STAT1 | 57193945 | 57194290 | 0,88 | ENSRNOG00000002094 | Atg3       |
| P-STAT1 | 57256569 | 57257123 | 1,25 | ENSRNOG00000002052 | Ccdc80     |
| P-STAT1 | 57261068 | 57261444 | 0,88 | ENSRNOG00000002052 | Ccdc80     |
| P-STAT1 | 57510835 | 57511833 | 1,21 | ENSRNOG00000013721 | RGD1311458 |
| P-STAT1 | 57788998 | 57789626 | 1,58 | ENSRNOG00000028077 | Wdr52      |
| P-STAT1 | 58282208 | 58282889 | 0,84 | ENSRNOG00000027179 | Zdhhc23    |
| P-STAT1 | 58519842 | 58520182 | 2,09 | ENSRNOG00000026772 | Drd3       |
| P-STAT1 | 60872783 | 60873452 | 1,12 | ENSRNOG00000031852 | Lsamp      |
| P-STAT1 | 60874629 | 60874990 | 0,88 | ENSRNOG00000031852 | Lsamp      |
| P-STAT1 | 63810637 | 63810904 | 1,12 | ENSRNOG00000003088 | Cdgap      |
| P-STAT1 | 64238778 | 64239124 | 1,16 | ENSRNOG00000002906 | Nr1i2      |
| P-STAT1 | 64932201 | 64932453 | 1,12 | ENSRNOG00000002701 | Hgd        |
| P-STAT1 | 64968995 | 64969519 | 0,98 | ENSRNOG00000026008 | Gtf2e1     |
| P-STAT1 | 65762330 | 65762796 | 1,07 | ENSRNOG00000038868 | Iqcb1      |
| P-STAT1 | 65762330 | 65762796 | 1,07 | ENSRNOG00000002350 | Eaf2       |
| P-STAT1 | 65928305 | 65929240 | 1,07 | ENSRNOG00000002289 | Ildr1      |
| P-STAT1 | 66266789 | 66267269 | 0,84 | ENSRNOG00000033557 | Stfa2l1    |
| P-STAT1 | 68796359 | 68796718 | 0,88 | ENSRNOG00000001794 | Muc13      |
| P-STAT1 | 69549485 | 69550136 | 0,98 | ENSRNOG00000001781 | Lmln       |
| P-STAT1 | 69549485 | 69550136 | 0,98 | ENSRNOG00000026420 | Iqcg       |
| P-STAT1 | 69553605 | 69554051 | 1,35 | ENSRNOG00000026420 | Iqcg       |
| P-STAT1 | 69553605 | 69554051 | 1,35 | ENSRNOG00000038678 | Rpl35a     |
| P-STAT1 | 69968309 | 69968641 | 1,25 | ENSRNOG00000001769 | LOC682784  |
| P-STAT1 | 70187458 | 70187945 | 1,39 | ENSRNOG00000001758 | Tctex1d2   |
| P-STAT1 | 70279388 | 70279752 | 1,39 | ENSRNOG00000001756 | Ubxn7      |
| P-STAT1 | 70528522 | 70529074 | 0,98 | ENSRNOG00000001747 | Pak2       |
| P-STAT1 | 71166875 | 71167224 | 0,93 | ENSRNOG00000001736 | Bdh1       |
| P-STAT1 | 71411009 | 71411362 | 1,12 | ENSRNOG00000001730 | Acap2      |
| P-STAT1 | 72027211 | 72027572 | 1,16 | ENSRNOG00000001727 | Lsg1       |
| P-STAT1 | 72261346 | 72261690 | 1,53 | ENSRNOG00000001724 | Atp13a3    |
| P-STAT1 | 72609474 | 72609813 | 1,07 | ENSRNOG00000001720 | Hes1       |
| P-STAT1 | 73438548 | 73438904 | 1,35 | ENSRNOG00000001711 | Hrasls     |
| P-STAT1 | 73440543 | 73441296 | 1,07 | ENSRNOG00000001711 | Hrasls     |
| P-STAT1 | 75459281 | 75459621 | 0,98 | ENSRNOG00000030462 | Ostn       |
| P-STAT1 | 77199903 | 77200246 | 1,07 | ENSRNOG00000001924 | Tp63       |
| P-STAT1 | 79123652 | 79124225 | 1,07 | ENSRNOG00000001837 | Sst        |
| P-STAT1 | 79445157 | 79445693 | 0,93 | ENSRNOG00000028895 | Rtp4       |
| P-STAT1 | 79447697 | 79448043 | 1,58 | ENSRNOG00000028895 | Rtp4       |
| P-STAT1 | 79533091 | 79533531 | 0,88 | ENSRNOG00000001827 | Masp1      |
| P-STAT1 | 79625936 | 79626700 | 0,84 | ENSRNOG00000021992 | Rtp1       |
| P-STAT1 | 80377590 | 80378024 | 0,98 | ENSRNOG00000001803 | Dnajb11    |

|         |          |          |      |                     |             |
|---------|----------|----------|------|---------------------|-------------|
| P-STAT1 | 81472770 | 81473224 | 0,98 | ENSRNOG00000001770  | Ehhadh      |
| P-STAT1 | 82411303 | 82411657 | 1,07 | ENSRNOG00000001750  | Chrd        |
| P-STAT1 | 82411303 | 82411657 | 1,07 | ENSRNOG00000001749  | Thpo        |
| P-STAT1 | 82490084 | 82490831 | 1,77 | ENSRNOG00000001719  | Psmd2       |
| P-STAT1 | 82555553 | 82555901 | 0,98 | ENSRNOG00000001707  | Vwa5b2      |
| P-STAT1 | 82585497 | 82585851 | 0,93 | ENSRNOG00000001710  | Abcf3       |
| P-STAT1 | 82977538 | 82977992 | 1,07 | ENSRNOG00000001911  | Map6d1      |
| P-STAT1 | 83064344 | 83064795 | 1,12 | ENSRNOG00000023107  | Yeats2      |
| P-STAT1 | 83445451 | 83445918 | 1,77 | ENSRNOG00000022792  | Lamp3       |
| P-STAT1 | 83501733 | 83502095 | 0,88 | ENSRNOG00000031704  | Olr1565     |
| P-STAT1 | 83618513 | 83619478 | 1,16 | ENSRNOG00000038108  | Olr1567     |
| P-STAT1 | 83640066 | 83641219 | 0,84 | ENSRNOG00000038107  | Olr1568     |
| P-STAT1 | 83669087 | 83670020 | 0,98 | ENSRNOG00000038103  | Olr1569     |
| P-STAT1 | 84400272 | 84400613 | 1,49 | ENSRNOG00000001892  | Tbx1        |
| P-STAT1 | 84865148 | 84865809 | 1,3  | ENSRNOG00000030920  | Rtn4r       |
| P-STAT1 | 84903395 | 84903934 | 1,3  | ENSRNOG00000000281  | Prodh       |
| P-STAT1 | 85000001 | 85000364 | 0,93 | ENSRNOG00000001839  | Vpreb2      |
| P-STAT1 | 85062965 | 85063494 | 0,88 | ENSRNOG00000000283  | Dgcr14      |
| P-STAT1 | 85176491 | 85176855 | 1,35 | ENSRNOG00000000288  | Scarf2      |
| P-STAT1 | 85472085 | 85472434 | 0,93 | ENSRNOG000000037967 | Thap7       |
| P-STAT1 | 85677017 | 85677373 | 0,98 | ENSRNOG00000001865  | Serpind1    |
| P-STAT1 | 85773578 | 85774072 | 1,44 | ENSRNOG00000001863  | Hic2        |
| P-STAT1 | 85900003 | 85901021 | 1,35 | ENSRNOG000000026900 | Ppil2       |
| P-STAT1 | 86604978 | 86605308 | 0,88 | ENSRNOG000000025252 | Yars2       |
| P-STAT1 | 86608052 | 86608431 | 1,21 | ENSRNOG000000025252 | Yars2       |
| P-STAT1 | 87170679 | 87171316 | 0,88 | ENSRNOG000000025028 | Prkdc       |
| P-STAT1 | 87170679 | 87171316 | 0,88 | ENSRNOG00000001833  | Mcm4        |
| P-STAT1 | 93377    | 93953    | 0,9  | ENSRNOG000000030410 | Zinki       |
| P-STAT1 | 1290508  | 1290758  | 1,76 | ENSRNOG00000001072  | Lass4       |
| P-STAT1 | 1294676  | 1295125  | 1,13 | ENSRNOG00000001072  | Lass4       |
| P-STAT1 | 1438434  | 1439382  | 0,77 | ENSRNOG000000028531 | Ccl25       |
| P-STAT1 | 2500401  | 2501170  | 0,99 | ENSRNOG00000001001  | Retn        |
| P-STAT1 | 2503052  | 2503506  | 1,67 | ENSRNOG00000001001  | Retn        |
| P-STAT1 | 2531273  | 2531735  | 2,07 | ENSRNOG00000000988  | Xab2        |
| P-STAT1 | 2653978  | 2654631  | 0,99 | ENSRNOG00000000975  | Mcoln1      |
| P-STAT1 | 2662846  | 2663411  | 1,13 | ENSRNOG00000000974  | Zfp358      |
| P-STAT1 | 3499041  | 3499372  | 0,95 | ENSRNOG00000001090  | Stard13     |
| P-STAT1 | 6269277  | 6269985  | 0,81 | ENSRNOG00000000907  | Alox5ap     |
| P-STAT1 | 7698955  | 7699383  | 0,86 | ENSRNOG00000000937  | Slc46a3     |
| P-STAT1 | 7731478  | 7731852  | 1,94 | ENSRNOG00000000939  | Pomp        |
| P-STAT1 | 9595124  | 9595575  | 0,95 | ENSRNOG000000032560 | Cyp3a23/3a1 |
| P-STAT1 | 9787335  | 9788224  | 1,62 | ENSRNOG00000000989  | Bud31       |
| P-STAT1 | 10370664 | 10371000 | 1,13 | ENSRNOG00000001006  | Nptx2       |
| P-STAT1 | 10915384 | 10915883 | 0,95 | ENSRNOG00000001031  | Ocm         |
| P-STAT1 | 10916439 | 10916888 | 1,31 | ENSRNOG00000001031  | Ocm         |
| P-STAT1 | 11006727 | 11007076 | 1,17 | ENSRNOG00000001036  | Rsph10b2    |
| P-STAT1 | 11024856 | 11025399 | 1,13 | ENSRNOG00000001044  | AIMP2_RAT   |
| P-STAT1 | 11026887 | 11027261 | 0,9  | ENSRNOG00000001044  | AIMP2_RAT   |
| P-STAT1 | 11708008 | 11708362 | 2,75 | ENSRNOG00000001095  | MGC125213   |

|         |          |          |      |                     |            |
|---------|----------|----------|------|---------------------|------------|
| P-STAT1 | 12251604 | 12251954 | 1,26 | ENSRNOG00000001115  | Slc29a4    |
| P-STAT1 | 12571178 | 12571547 | 1,13 | ENSRNOG00000001104  | Foxk1      |
| P-STAT1 | 14778574 | 14778918 | 0,9  | ENSRNOG00000001260  | Nudt1      |
| P-STAT1 | 14778574 | 14778918 | 0,9  | ENSRNOG000000043267 | Ftsj2      |
| P-STAT1 | 15723665 | 15724207 | 0,86 | ENSRNOG00000001287  | Gper       |
| P-STAT1 | 16294362 | 16294906 | 0,9  | ENSRNOG000000032693 | LOC498155  |
| P-STAT1 | 16523782 | 16524122 | 0,95 | ENSRNOG000000028651 | RGD1566386 |
| P-STAT1 | 17628585 | 17629161 | 0,95 | ENSRNOG00000001355  | TAF6_RAT   |
| P-STAT1 | 17628585 | 17629161 | 0,95 | ENSRNOG000000027175 | Cnpy4      |
| P-STAT1 | 17862868 | 17863292 | 1,22 | ENSRNOG00000001360  | Stag3      |
| P-STAT1 | 19584227 | 19584681 | 0,86 | ENSRNOG00000001410  | Gigyf1     |
| P-STAT1 | 20855183 | 20855957 | 1,04 | ENSRNOG00000001417  | Plod3      |
| P-STAT1 | 20855183 | 20855957 | 1,04 | ENSRNOG00000001418  | Znhit1     |
| P-STAT1 | 21585223 | 21585588 | 0,99 | ENSRNOG00000001426  | Prkrip1    |
| P-STAT1 | 22722568 | 22723215 | 1,13 | ENSRNOG000000033700 | Wbscr22    |
| P-STAT1 | 22725531 | 22725880 | 0,9  | ENSRNOG000000033700 | Wbscr22    |
| P-STAT1 | 22725531 | 22725880 | 0,9  | ENSRNOG000000031721 | Dnajc30    |
| P-STAT1 | 27290378 | 27291107 | 1,22 | ENSRNOG000000000886 | Caln1      |
| P-STAT1 | 27527756 | 27528236 | 0,81 | ENSRNOG000000000895 | Rabgef1    |
| P-STAT1 | 28044486 | 28045075 | 1,13 | ENSRNOG000000000920 | Phkg1      |
| P-STAT1 | 28747811 | 28748280 | 0,99 | ENSRNOG000000000936 | Stx2       |
| P-STAT1 | 29038814 | 29039220 | 1,62 | ENSRNOG000000000934 | Piwil1     |
| P-STAT1 | 32093788 | 32094224 | 0,86 | ENSRNOG000000038406 | Tmem132b   |
| P-STAT1 | 32094888 | 32095523 | 0,86 | ENSRNOG000000038406 | Tmem132b   |
| P-STAT1 | 32331303 | 32331984 | 0,9  | ENSRNOG000000028756 | UBIQ_RAT   |
| P-STAT1 | 32387490 | 32387839 | 0,99 | ENSRNOG000000000981 | Scarb1     |
| P-STAT1 | 33122751 | 33123405 | 0,9  | ENSRNOG00000001019  | Tect2      |
| P-STAT1 | 33137414 | 33137853 | 1,08 | ENSRNOG00000001035  | Gtf2h3     |
| P-STAT1 | 33137414 | 33137853 | 1,08 | ENSRNOG00000001039  | Eif2b1     |
| P-STAT1 | 33139064 | 33139614 | 0,9  | ENSRNOG00000001035  | Gtf2h3     |
| P-STAT1 | 33139064 | 33139614 | 0,9  | ENSRNOG00000001039  | Eif2b1     |
| P-STAT1 | 33140189 | 33140736 | 1,04 | ENSRNOG00000001035  | Gtf2h3     |
| P-STAT1 | 33681974 | 33682313 | 0,95 | ENSRNOG00000001086  | Vps37b     |
| P-STAT1 | 33974526 | 33975102 | 0,95 | ENSRNOG00000001238  | LOC360807  |
| P-STAT1 | 35376730 | 35377074 | 1,44 | ENSRNOG000000035826 | SNORA67    |
| P-STAT1 | 35376730 | 35377074 | 1,44 | ENSRNOG000000008673 | Arpc3      |
| P-STAT1 | 35600387 | 35600736 | 0,95 | ENSRNOG00000001269  | PP1G_RAT   |
| P-STAT1 | 36297756 | 36298195 | 0,86 | ENSRNOG00000001351  | Trafd1     |
| P-STAT1 | 36300569 | 36300986 | 0,95 | ENSRNOG00000001351  | Trafd1     |
| P-STAT1 | 36761487 | 36761941 | 0,9  | ENSRNOG000000037744 | Oas1i      |
| P-STAT1 | 36882744 | 36883095 | 1,85 | ENSRNOG000000031726 | Oas1e      |
| P-STAT1 | 37081510 | 37082064 | 0,9  | ENSRNOG00000001374  | Rasal1     |
| P-STAT1 | 37115420 | 37115744 | 0,86 | ENSRNOG000000037720 | RGD1306772 |
| P-STAT1 | 37138124 | 37139002 | 0,86 | ENSRNOG00000001378  | IQCD_RAT   |
| P-STAT1 | 39459668 | 39460226 | 1,35 | ENSRNOG00000001124  | Rnft2      |
| P-STAT1 | 39546580 | 39547184 | 1,4  | ENSRNOG00000001125  | Hrk        |
| P-STAT1 | 39573177 | 39573647 | 0,86 | ENSRNOG00000001126  | Fbxw8      |
| P-STAT1 | 39754916 | 39755314 | 1,08 | ENSRNOG00000001129  | Fbxo21     |
| P-STAT1 | 40430328 | 40430657 | 1,04 | ENSRNOG00000001135  | Wsb2       |

|         |          |          |      |                     |            |
|---------|----------|----------|------|---------------------|------------|
| P-STAT1 | 42449718 | 42450071 | 1,13 | ENSRNOG00000001156  | Msi1       |
| P-STAT1 | 42553450 | 42553810 | 0,99 | ENSRNOG00000001163  | Sfrs9      |
| P-STAT1 | 42607892 | 42608614 | 0,86 | ENSRNOG00000001172  | Rnf10      |
| P-STAT1 | 42955236 | 42955570 | 0,81 | ENSRNOG00000001185  | RGD1311899 |
| P-STAT1 | 43222658 | 43223709 | 0,77 | ENSRNOG00000001195  | Trpv4      |
| P-STAT1 | 43370459 | 43370830 | 1,22 | ENSRNOG00000000691  | Foxn4      |
| P-STAT1 | 44325526 | 44326550 | 0,99 | ENSRNOG00000000708  | Sgsm1      |
| P-STAT1 | 45435084 | 45435523 | 1,35 | ENSRNOG00000000665  | Pitpnb     |
| P-STAT1 | 45968791 | 45969135 | 1,17 | ENSRNOG00000037509  | Chek2      |
| P-STAT1 | 12146051 | 12146500 | 1,17 | ENSRNOG00000002882  | Zcchc2     |
| P-STAT1 | 13035759 | 13036730 | 0,84 | ENSRNOG00000002640  | Serpinb5   |
| P-STAT1 | 13390039 | 13390809 | 0,99 | ENSRNOG00000002583  | Serpinb11  |
| P-STAT1 | 13460558 | 13460814 | 1,31 | ENSRNOG00000002555  | Serpinb7   |
| P-STAT1 | 13464005 | 13464445 | 1,27 | ENSRNOG00000002555  | Serpinb7   |
| P-STAT1 | 13644316 | 13645266 | 0,84 | ENSRNOG00000002417  | Serpinb10  |
| P-STAT1 | 28707844 | 28708333 | 1,08 | ENSRNOG00000029556  | Cntnap5a   |
| P-STAT1 | 30927128 | 30927801 | 1,31 | ENSRNOG00000002319  | Tsn        |
| P-STAT1 | 31610578 | 31611034 | 1,03 | ENSRNOG00000007261  | Gli2       |
| P-STAT1 | 32428329 | 32428678 | 0,99 | ENSRNOG00000002538  | Epb4.1l5   |
| P-STAT1 | 32693686 | 32694753 | 1,88 | ENSRNOG00000025484  | Tmem177    |
| P-STAT1 | 39828797 | 39829051 | 1,03 | ENSRNOG00000003614  | Mgat5      |
| P-STAT1 | 41072990 | 41073729 | 0,8  | ENSRNOG00000003703  | Mcm6       |
| P-STAT1 | 43347285 | 43347930 | 0,84 | ENSRNOG00000003927  | Cd55       |
| P-STAT1 | 43348636 | 43348998 | 1,08 | ENSRNOG00000003927  | Cd55       |
| P-STAT1 | 43588420 | 43588965 | 1,31 | ENSRNOG00000004062  | C4bpa      |
| P-STAT1 | 43588420 | 43588965 | 1,31 | ENSRNOG000000030374 | Lsm6       |
| P-STAT1 | 43591073 | 43592226 | 0,89 | ENSRNOG000000030374 | Lsm6       |
| P-STAT1 | 43591073 | 43592226 | 0,89 | ENSRNOG00000004062  | C4bpa      |
| P-STAT1 | 43607926 | 43608672 | 0,99 | ENSRNOG00000004125  | C4bpb      |
| P-STAT1 | 43863566 | 43863915 | 0,99 | ENSRNOG00000004633  | Il20       |
| P-STAT1 | 44042523 | 44043082 | 0,89 | ENSRNOG00000004726  | Q80ZF4_RAT |
| P-STAT1 | 44044683 | 44045012 | 0,94 | ENSRNOG00000004726  | Q80ZF4_RAT |
| P-STAT1 | 44533024 | 44533479 | 1,74 | ENSRNOG00000006891  | Avpr1b     |
| P-STAT1 | 44617027 | 44617356 | 0,94 | ENSRNOG00000039754  | RGD1562617 |
| P-STAT1 | 44617832 | 44618781 | 0,8  | ENSRNOG00000039754  | RGD1562617 |
| P-STAT1 | 45389846 | 45391050 | 1,36 | ENSRNOG00000028752  | Tmem81     |
| P-STAT1 | 46517562 | 46518082 | 0,89 | ENSRNOG00000029418  | LOC498231  |
| P-STAT1 | 46586858 | 46587307 | 0,94 | ENSRNOG00000002993  | RGD1308290 |
| P-STAT1 | 46588263 | 46588755 | 1,13 | ENSRNOG00000002993  | RGD1308290 |
| P-STAT1 | 46588263 | 46588755 | 1,13 | ENSRNOG00000031321  | LOC363987  |
| P-STAT1 | 46984953 | 46985677 | 1,45 | ENSRNOG00000003183  | Fmod       |
| P-STAT1 | 47321489 | 47321839 | 0,99 | ENSRNOG00000003594  | Tmem183a   |
| P-STAT1 | 47922328 | 47923702 | 0,8  | ENSRNOG00000005032  | Ppp1r12b   |
| P-STAT1 | 47922328 | 47923702 | 0,8  | ENSRNOG00000005038  | Ube2t      |
| P-STAT1 | 48313298 | 48313544 | 0,99 | ENSRNOG00000007040  | Timm17a    |
| P-STAT1 | 48788539 | 48789089 | 0,89 | ENSRNOG00000009068  | Phlda3     |
| P-STAT1 | 51461135 | 51461696 | 0,99 | ENSRNOG00000022480  | Atp6v1g3   |
| P-STAT1 | 52864816 | 52865848 | 1,13 | ENSRNOG00000012613  | F13b       |
| P-STAT1 | 53234445 | 53234796 | 1,03 | ENSRNOG00000042369  | RGD1564614 |

|         |          |          |      |                     |            |
|---------|----------|----------|------|---------------------|------------|
| P-STAT1 | 57535552 | 57536196 | 1,27 | ENSRNOG00000003258  | Cdc73      |
| P-STAT1 | 57606130 | 57606579 | 0,89 | ENSRNOG00000003545  | Uchl5      |
| P-STAT1 | 57606130 | 57606579 | 0,89 | ENSRNOG000000043601 | snoU109    |
| P-STAT1 | 57606130 | 57606579 | 0,89 | ENSRNOG000000003434 | Trove2     |
| P-STAT1 | 62627759 | 62628313 | 0,89 | ENSRNOG000000027254 | LOC689412  |
| P-STAT1 | 64279746 | 64280104 | 0,99 | ENSRNOG000000002657 | Pla2g4a    |
| P-STAT1 | 64686993 | 64687633 | 0,99 | ENSRNOG000000002394 | Tpr        |
| P-STAT1 | 64686993 | 64687633 | 0,99 | ENSRNOG000000002473 | RGD1307830 |
| P-STAT1 | 66464696 | 66465151 | 0,94 | ENSRNOG000000002403 | Fam129a    |
| P-STAT1 | 66954903 | 66955757 | 1,31 | ENSRNOG000000028236 | RGD1309104 |
| P-STAT1 | 67966519 | 67966853 | 1,36 | ENSRNOG000000027697 | Nmnat2     |
| P-STAT1 | 67968154 | 67969003 | 1,41 | ENSRNOG000000027697 | Nmnat2     |
| P-STAT1 | 68803984 | 68804543 | 1,17 | ENSRNOG000000027024 | Rgs16      |
| P-STAT1 | 68818378 | 68819417 | 1,22 | ENSRNOG000000027017 | Rnasel     |
| P-STAT1 | 68875417 | 68875761 | 0,99 | ENSRNOG000000027001 | Hnrnpa3    |
| P-STAT1 | 68876214 | 68876655 | 1,27 | ENSRNOG000000027001 | Hnrnpa3    |
| P-STAT1 | 70117681 | 70118010 | 0,99 | ENSRNOG000000003402 | Stx6       |
| P-STAT1 | 70516299 | 70516998 | 0,84 | ENSRNOG000000003550 | Acbd6      |
| P-STAT1 | 72034917 | 72035479 | 0,94 | ENSRNOG000000004712 | Angptl1    |
| P-STAT1 | 72109051 | 72109662 | 0,99 | ENSRNOG000000004736 | Q0VGK1_RAT |
| P-STAT1 | 73648479 | 73648831 | 2,3  | ENSRNOG000000005592 | Fam5b      |
| P-STAT1 | 75611145 | 75611489 | 1,6  | ENSRNOG000000002569 | Mrps14     |
| P-STAT1 | 76545534 | 76546078 | 1,03 | ENSRNOG000000002783 | Serpinc1   |
| P-STAT1 | 77026531 | 77027088 | 0,89 | ENSRNOG000000002968 | Tnfsf4     |
| P-STAT1 | 78591800 | 78592749 | 0,89 | ENSRNOG000000003510 | Fmo2       |
| P-STAT1 | 79758252 | 79758903 | 1,13 | ENSRNOG000000002587 | LOC498265  |
| P-STAT1 | 79824279 | 79824740 | 1,08 | ENSRNOG000000002776 | Sell       |
| P-STAT1 | 79892507 | 79893051 | 1,08 | ENSRNOG000000002794 | Selp       |
| P-STAT1 | 80037856 | 80038500 | 1,08 | ENSRNOG000000002860 | RGD1309708 |
| P-STAT1 | 80040283 | 80040646 | 1,31 | ENSRNOG000000002860 | RGD1309708 |
| P-STAT1 | 80072458 | 80072988 | 1,03 | ENSRNOG000000002884 | Blzf1      |
| P-STAT1 | 80237208 | 80237880 | 0,94 | ENSRNOG000000002934 | Atp1b1     |
| P-STAT1 | 80913240 | 80913584 | 1,08 | ENSRNOG000000002979 | Tbx19      |
| P-STAT1 | 80996667 | 80997100 | 0,94 | ENSRNOG000000003048 | Tiprl      |
| P-STAT1 | 81359080 | 81359571 | 1,17 | ENSRNOG000000003248 | Mpzl1      |
| P-STAT1 | 81515452 | 81516479 | 0,89 | ENSRNOG000000044631 | 5S_rRNA    |
| P-STAT1 | 81515452 | 81516479 | 0,89 | ENSRNOG000000003298 | Cd247      |
| P-STAT1 | 82325789 | 82326628 | 0,84 | ENSRNOG000000025119 | Fmo9       |
| P-STAT1 | 83350890 | 83351831 | 1,64 | ENSRNOG000000004642 | Lmx1a      |
| P-STAT1 | 85441051 | 85441610 | 0,94 | ENSRNOG000000002730 | Rgs5       |
| P-STAT1 | 85543224 | 85544058 | 1,08 | ENSRNOG000000002773 | Rgs4       |
| P-STAT1 | 85846067 | 85846436 | 1,03 | ENSRNOG000000002881 | Ddr2       |
| P-STAT1 | 86147797 | 86148241 | 0,99 | ENSRNOG000000042929 | Gm7694     |
| P-STAT1 | 86147797 | 86148241 | 0,99 | ENSRNOG000000002972 | RGD1565283 |
| P-STAT1 | 86148687 | 86149508 | 1,08 | ENSRNOG000000042929 | Gm7694     |
| P-STAT1 | 86148687 | 86149508 | 1,08 | ENSRNOG000000002972 | RGD1565283 |
| P-STAT1 | 86149643 | 86150457 | 1,27 | ENSRNOG000000042929 | Gm7694     |
| P-STAT1 | 86149643 | 86150457 | 1,27 | ENSRNOG000000002972 | RGD1565283 |
| P-STAT1 | 86480862 | 86481421 | 1,08 | ENSRNOG000000003018 | Olfml2b    |

|         |           |           |      |                     |             |
|---------|-----------|-----------|------|---------------------|-------------|
| P-STAT1 | 87082016  | 87082489  | 0,94 | ENSRNOG00000003209  | Pcp4l1      |
| P-STAT1 | 87173773  | 87174233  | 1,13 | ENSRNOG00000003567  | Ppox        |
| P-STAT1 | 87180060  | 87180422  | 1,17 | ENSRNOG000000038347 | Usp21       |
| P-STAT1 | 87181979  | 87182627  | 1,41 | ENSRNOG000000038347 | Usp21       |
| P-STAT1 | 87275345  | 87276012  | 0,84 | ENSRNOG00000004029  | Pvrl4       |
| P-STAT1 | 87291010  | 87291549  | 1,08 | ENSRNOG00000004192  | Arhgap30    |
| P-STAT1 | 87332546  | 87334011  | 1,13 | ENSRNOG00000004255  | Usf1        |
| P-STAT1 | 87509329  | 87509768  | 0,89 | ENSRNOG00000000045  | Cd244       |
| P-STAT1 | 87680914  | 87681355  | 0,94 | ENSRNOG00000004737  | Cd48        |
| P-STAT1 | 87683984  | 87684323  | 0,94 | ENSRNOG00000004737  | Cd48        |
| P-STAT1 | 87765510  | 87765899  | 1,08 | ENSRNOG00000004761  | Slamf1      |
| P-STAT1 | 88055810  | 88056149  | 1,22 | ENSRNOG00000005166  | Nhlh1       |
| P-STAT1 | 88072864  | 88073398  | 0,99 | ENSRNOG00000006247  | Copa        |
| P-STAT1 | 88248711  | 88249175  | 1,36 | ENSRNOG000000032378 | AT1A4_RAT   |
| P-STAT1 | 88340042  | 88340371  | 0,94 | ENSRNOG00000007705  | Kcnj10      |
| P-STAT1 | 88486016  | 88486360  | 2,21 | ENSRNOG00000008054  | Igsf9       |
| P-STAT1 | 88596634  | 88596998  | 1,08 | ENSRNOG00000008736  | Slamf8      |
| P-STAT1 | 89335015  | 89335564  | 1,03 | ENSRNOG000000030851 | Olr1579     |
| P-STAT1 | 89394196  | 89394562  | 1,6  | ENSRNOG000000032235 | Olr1581     |
| P-STAT1 | 89422308  | 89422687  | 0,89 | ENSRNOG000000031953 | Olr1583     |
| P-STAT1 | 89436353  | 89436788  | 1,08 | ENSRNOG000000009177 | Fcer1a      |
| P-STAT1 | 89439256  | 89439749  | 1,08 | ENSRNOG000000009177 | Fcer1a      |
| P-STAT1 | 89794802  | 89795365  | 1,45 | ENSRNOG000000031808 | Olr1585     |
| P-STAT1 | 89842132  | 89843364  | 1,6  | ENSRNOG000000022387 | Olr1589     |
| P-STAT1 | 89852111  | 89852460  | 0,94 | ENSRNOG000000030059 | Olr1590     |
| P-STAT1 | 89924838  | 89925179  | 2,02 | ENSRNOG000000022329 | Olr1595     |
| P-STAT1 | 89933999  | 89934946  | 1,36 | ENSRNOG000000003528 | Olr1596     |
| P-STAT1 | 89936179  | 89937238  | 0,8  | ENSRNOG000000003528 | Olr1596     |
| P-STAT1 | 89937274  | 89938438  | 1,27 | ENSRNOG000000003528 | Olr1596     |
| P-STAT1 | 89949551  | 89950112  | 1,45 | ENSRNOG000000003537 | Spta1       |
| P-STAT1 | 90045981  | 90046360  | 1,31 | ENSRNOG000000033221 | Olr1598     |
| P-STAT1 | 90065272  | 90065716  | 1,22 | ENSRNOG000000029332 | Olr1600     |
| P-STAT1 | 91210701  | 91211256  | 1,17 | ENSRNOG000000021984 | Rgs7        |
| P-STAT1 | 91561139  | 91562008  | 0,89 | ENSRNOG000000038079 | Uba2-ps1    |
| P-STAT1 | 91619296  | 91620054  | 1,08 | ENSRNOG000000003876 | Exo1        |
| P-STAT1 | 93654424  | 93654764  | 1,08 | ENSRNOG000000021411 | LOC689766   |
| P-STAT1 | 94181384  | 94181738  | 1,5  | ENSRNOG000000028624 | Kif26b      |
| P-STAT1 | 97834989  | 97835496  | 0,99 | ENSRNOG000000003103 | Lbr         |
| P-STAT1 | 99241219  | 99241477  | 1,08 | ENSRNOG000000003635 | Disp1       |
| P-STAT1 | 99244519  | 99244877  | 1,74 | ENSRNOG000000003635 | Disp1       |
| P-STAT1 | 100020066 | 100020517 | 1,08 | ENSRNOG000000004066 | 1700056E22F |
| P-STAT1 | 100020066 | 100020517 | 1,08 | ENSRNOG000000004003 | Dusp10      |
| P-STAT1 | 102171383 | 102171737 | 1,31 | ENSRNOG000000023130 | Lyplal1     |
| P-STAT1 | 102857873 | 102858208 | 1,13 | ENSRNOG000000002450 | Rrp15       |
| P-STAT1 | 103352408 | 103352842 | 1,31 | ENSRNOG000000002512 | Gpatc2      |
| P-STAT1 | 106399832 | 106400181 | 2,06 | ENSRNOG000000032812 | LOC498308   |
| P-STAT1 | 107127485 | 107128020 | 1,08 | ENSRNOG000000003716 | Batf3       |
| P-STAT1 | 107227180 | 107227529 | 0,89 | ENSRNOG000000003745 | Atf3        |
| P-STAT1 | 107460612 | 107461291 | 1,55 | ENSRNOG000000000068 | Ppp2r5a     |

|         |           |           |      |                    |            |
|---------|-----------|-----------|------|--------------------|------------|
| P-STAT1 | 108125463 | 108125812 | 1,22 | ENSRNOG00000003841 | Kcqh1      |
| P-STAT1 | 108129640 | 108130114 | 1,08 | ENSRNOG00000003841 | Kcqh1      |
| P-STAT1 | 109088420 | 109088854 | 1,88 | ENSRNOG00000005861 | Hsd11b1    |
| P-STAT1 | 1565722   | 1566082   | 1,32 | ENSRNOG00000024207 | Fgfr1      |
| P-STAT1 | 1581495   | 1582637   | 1,41 | ENSRNOG00000000041 | Slc26a1    |
| P-STAT1 | 1629159   | 1629510   | 1    | ENSRNOG00000000048 | Gak        |
| P-STAT1 | 1732156   | 1732612   | 1    | ENSRNOG00000000060 | Cplx1      |
| P-STAT1 | 2234951   | 2235505   | 0,96 | ENSRNOG00000000075 | Mtf2       |
| P-STAT1 | 2406363   | 2406927   | 0,96 | ENSRNOG00000023529 | Rpl5       |
| P-STAT1 | 2595543   | 2596191   | 1,32 | ENSRNOG00000002042 | Gfi1       |
| P-STAT1 | 2931874   | 2932231   | 1,19 | ENSRNOG00000023389 | Ephx4      |
| P-STAT1 | 2935212   | 2935661   | 1,09 | ENSRNOG00000023389 | Ephx4      |
| P-STAT1 | 3444337   | 3444714   | 0,87 | ENSRNOG00000002105 | Cdc7       |
| P-STAT1 | 6647512   | 6648061   | 1,28 | ENSRNOG00000002167 | Dmp1       |
| P-STAT1 | 6765261   | 6765795   | 1,14 | ENSRNOG00000015093 | Sparcl1    |
| P-STAT1 | 6859715   | 6860049   | 1,55 | ENSRNOG00000002210 | Hsd17b11   |
| P-STAT1 | 10077937  | 10078308  | 1,41 | ENSRNOG00000002165 | Fam175a    |
| P-STAT1 | 10299584  | 10300128  | 1,23 | ENSRNOG00000002217 | Plac8      |
| P-STAT1 | 10398402  | 10398771  | 1,78 | ENSRNOG00000002203 | Lin54      |
| P-STAT1 | 10858218  | 10858658  | 0,87 | ENSRNOG00000002270 | Hnrpd1     |
| P-STAT1 | 12093274  | 12093727  | 1,19 | ENSRNOG00000002381 | Bmp3       |
| P-STAT1 | 12736822  | 12737781  | 0,82 | ENSRNOG00000022631 | Fgf5       |
| P-STAT1 | 12738437  | 12738886  | 1,09 | ENSRNOG00000022631 | Fgf5       |
| P-STAT1 | 12799420  | 12799869  | 1,09 | ENSRNOG00000002004 | Prdm8      |
| P-STAT1 | 13545511  | 13545867  | 1,37 | ENSRNOG00000029397 | Gk2        |
| P-STAT1 | 13548110  | 13548649  | 1,23 | ENSRNOG00000029397 | Gk2        |
| P-STAT1 | 14875801  | 14876164  | 1,05 | ENSRNOG00000002070 | Mrpl1      |
| P-STAT1 | 15130800  | 15131160  | 0,87 | ENSRNOG00000024899 | Cxcl13     |
| P-STAT1 | 15819240  | 15819570  | 1,09 | ENSRNOG00000024690 | RGD1561226 |
| P-STAT1 | 16550044  | 16550810  | 1,14 | ENSRNOG00000002182 | 11-wr2     |
| P-STAT1 | 17116505  | 17116835  | 1,69 | ENSRNOG00000002225 | Scarb2     |
| P-STAT1 | 17262804  | 17263427  | 0,96 | ENSRNOG00000022256 | Cxcl10     |
| P-STAT1 | 18082136  | 18082512  | 1,05 | ENSRNOG00000002579 | Parm1      |
| P-STAT1 | 18678417  | 18678956  | 0,87 | ENSRNOG00000002792 | Cxcl2      |
| P-STAT1 | 18813690  | 18814173  | 0,87 | ENSRNOG00000028015 | Pf4        |
| P-STAT1 | 18953049  | 18953585  | 0,91 | ENSRNOG00000002866 | Rassf6     |
| P-STAT1 | 18954640  | 18955194  | 1    | ENSRNOG00000002866 | Rassf6     |
| P-STAT1 | 19109683  | 19110211  | 1,05 | ENSRNOG00000002889 | Afp        |
| P-STAT1 | 19755283  | 19755932  | 1,14 | ENSRNOG00000027463 | Adamts3    |
| P-STAT1 | 20164316  | 20164855  | 1,19 | ENSRNOG00000003119 | Gc         |
| P-STAT1 | 20903684  | 20904018  | 0,91 | ENSRNOG00000003296 | Dck        |
| P-STAT1 | 20905235  | 20905588  | 0,91 | ENSRNOG00000003296 | Dck        |
| P-STAT1 | 20947055  | 20947405  | 1,14 | ENSRNOG00000010996 | Mobkl1a    |
| P-STAT1 | 21096747  | 21097316  | 1,19 | ENSRNOG00000003599 | Utp3       |
| P-STAT1 | 21681136  | 21681692  | 0,91 | ENSRNOG00000001951 | Csn3       |
| P-STAT1 | 21823037  | 21823597  | 0,87 | ENSRNOG00000039331 | Csn1s2a    |
| P-STAT1 | 22016470  | 22017107  | 1,05 | ENSRNOG00000001967 | Sult1b1    |
| P-STAT1 | 22043353  | 22043883  | 0,96 | ENSRNOG00000001973 | Ugt2a1     |
| P-STAT1 | 22047893  | 22048338  | 1,05 | ENSRNOG00000001973 | Ugt2a1     |

|         |          |          |      |                     |            |
|---------|----------|----------|------|---------------------|------------|
| P-STAT1 | 22635302 | 22635772 | 1    | ENSRNOG00000001990  | Ugt2b17    |
| P-STAT1 | 23623529 | 23623964 | 1,23 | ENSRNOG00000002011  | Gnrhr      |
| P-STAT1 | 23662193 | 23663156 | 1,09 | ENSRNOG000000021931 | Uba6       |
| P-STAT1 | 34334015 | 34334561 | 0,87 | ENSRNOG00000002216  | Srd5a3     |
| P-STAT1 | 34336346 | 34336917 | 0,87 | ENSRNOG00000002216  | Srd5a3     |
| P-STAT1 | 35519878 | 35520351 | 1,28 | ENSRNOG00000002267  | Chic2      |
| P-STAT1 | 35884643 | 35885077 | 1    | ENSRNOG00000002272  | Lnx1       |
| P-STAT1 | 36956690 | 36957252 | 1,14 | ENSRNOG00000002120  | Spata18    |
| P-STAT1 | 36956690 | 36957252 | 1,14 | ENSRNOG00000002135  | Sgcb       |
| P-STAT1 | 37610337 | 37610913 | 0,82 | ENSRNOG000000026091 | Slc10a4    |
| P-STAT1 | 37711688 | 37712144 | 1,09 | ENSRNOG00000002271  | Slain2     |
| P-STAT1 | 38015634 | 38016203 | 0,87 | ENSRNOG00000004778  | Cnga1      |
| P-STAT1 | 38018579 | 38018813 | 1,32 | ENSRNOG00000004778  | Cnga1      |
| P-STAT1 | 43518579 | 43519018 | 1,32 | ENSRNOG00000002254  | Tmem33     |
| P-STAT1 | 44127101 | 44127637 | 1,14 | ENSRNOG00000002343  | Uchl1      |
| P-STAT1 | 44127101 | 44127637 | 1,14 | ENSRNOG000000035424 | U6         |
| P-STAT1 | 45542832 | 45543296 | 0,87 | ENSRNOG00000002643  | Ugdh       |
| P-STAT1 | 46137559 | 46138118 | 0,96 | ENSRNOG000000038722 | Tlr10      |
| P-STAT1 | 46229753 | 46230197 | 0,96 | ENSRNOG00000002163  | Klf3       |
| P-STAT1 | 62050041 | 62050392 | 1,14 | ENSRNOG000000043124 | Cckar      |
| P-STAT1 | 63003808 | 63004295 | 1,6  | ENSRNOG000000003924 | Pi4k2b     |
| P-STAT1 | 65549517 | 65549881 | 1,32 | ENSRNOG000000024634 | Gba3       |
| P-STAT1 | 70679043 | 70679502 | 1,32 | ENSRNOG000000003592 | Med28      |
| P-STAT1 | 72120624 | 72121130 | 0,87 | ENSRNOG000000003098 | Prom1      |
| P-STAT1 | 76435496 | 76435930 | 1,05 | ENSRNOG000000010598 | Hs3st1     |
| P-STAT1 | 77490670 | 77490899 | 0,91 | ENSRNOG000000028498 | Wdr1       |
| P-STAT1 | 77772114 | 77772758 | 1,05 | ENSRNOG000000005338 | Drd5       |
| P-STAT1 | 77874100 | 77874451 | 1,78 | ENSRNOG000000005374 | Lyar       |
| P-STAT1 | 77874100 | 77874451 | 1,78 | ENSRNOG000000005633 | Znf509     |
| P-STAT1 | 77876607 | 77876976 | 1,09 | ENSRNOG000000005374 | Lyar       |
| P-STAT1 | 79549435 | 79549989 | 1,41 | ENSRNOG000000005526 | Mrfap1     |
| P-STAT1 | 80146777 | 80147331 | 1,05 | ENSRNOG000000006845 | RGD1307368 |
| P-STAT1 | 80447801 | 80448451 | 0,87 | ENSRNOG000000007599 | Afap1      |
| P-STAT1 | 80626805 | 80627344 | 0,96 | ENSRNOG000000007882 | ABLM2_RAT  |
| P-STAT1 | 80651870 | 80652309 | 0,96 | ENSRNOG000000007993 | Sh3tc1     |
| P-STAT1 | 81112057 | 81112411 | 1,14 | ENSRNOG000000009299 | Adra2c     |
| P-STAT1 | 82155762 | 82156498 | 0,82 | ENSRNOG000000014874 | Zfyve28    |
| P-STAT1 | 82270134 | 82270568 | 1,55 | ENSRNOG000000015255 | LOC680477  |
| P-STAT1 | 83051936 | 83052470 | 1,05 | ENSRNOG000000005428 | Ctbp1      |
| P-STAT1 | 84185595 | 84186247 | 0,82 | ENSRNOG000000019451 | Smtn       |
| P-STAT1 | 84838347 | 84838887 | 0,96 | ENSRNOG000000006740 | Gatsl3     |
| P-STAT1 | 84885775 | 84886244 | 1,28 | ENSRNOG000000007002 | Lif        |
| P-STAT1 | 85561406 | 85561850 | 1,05 | ENSRNOG000000008456 | Thoc5      |
| P-STAT1 | 85606107 | 85606777 | 0,82 | ENSRNOG000000008716 | Nefh       |
| P-STAT1 | 86212808 | 86213137 | 0,87 | ENSRNOG000000011940 | Ankrd36    |
| P-STAT1 | 86364929 | 86365483 | 1,55 | ENSRNOG000000011979 | Mrps24     |
| P-STAT1 | 86469745 | 86470660 | 1,05 | ENSRNOG000000013532 | Pgam2      |
| P-STAT1 | 86571158 | 86572136 | 1,23 | ENSRNOG000000014409 | Myl7       |
| P-STAT1 | 87162320 | 87162879 | 1,37 | ENSRNOG000000006423 | Ppia       |

|         |           |           |      |                    |            |
|---------|-----------|-----------|------|--------------------|------------|
| P-STAT1 | 87201762  | 87202111  | 1,37 | ENSRNOG00000007026 | H2afv      |
| P-STAT1 | 87326541  | 87326880  | 1,28 | ENSRNOG00000007643 | Ccm2       |
| P-STAT1 | 87948691  | 87949065  | 1,46 | ENSRNOG00000008371 | Igfbp1     |
| P-STAT1 | 87969831  | 87970170  | 1,37 | ENSRNOG00000008645 | Igfbp3     |
| P-STAT1 | 89652012  | 89652307  | 0,82 | ENSRNOG00000004972 | Upp1       |
| P-STAT1 | 92356550  | 92357194  | 0,87 | ENSRNOG00000037621 | RGD1309870 |
| P-STAT1 | 92556775  | 92557419  | 1    | ENSRNOG00000004444 | Ikzf1      |
| P-STAT1 | 92558896  | 92559355  | 1,37 | ENSRNOG00000004444 | Ikzf1      |
| P-STAT1 | 92697471  | 92698220  | 2,05 | ENSRNOG00000004440 | Figl1      |
| P-STAT1 | 99832227  | 99832693  | 0,91 | ENSRNOG00000004606 | Meis1      |
| P-STAT1 | 101371130 | 101371486 | 1,14 | ENSRNOG00000005393 | Sertad2    |
| P-STAT1 | 101866720 | 101867275 | 1,14 | ENSRNOG00000006329 | Peli1      |
| P-STAT1 | 101869220 | 101869688 | 0,87 | ENSRNOG00000006329 | Peli1      |
| P-STAT1 | 102275737 | 102276086 | 1,91 | ENSRNOG00000008103 | Mdh1       |
| P-STAT1 | 103159355 | 103159709 | 0,87 | ENSRNOG00000009220 | Tmem17     |
| P-STAT1 | 103657794 | 103658338 | 0,91 | ENSRNOG00000009639 | Zrsr1      |
| P-STAT1 | 103690081 | 103691442 | 1,28 | ENSRNOG00000009881 | Fam161a    |
| P-STAT1 | 110557337 | 110557829 | 0,91 | ENSRNOG00000004456 | RGD1307937 |
| P-STAT1 | 110562359 | 110562712 | 1,19 | ENSRNOG00000004426 | Rps27a     |
| P-STAT1 | 110562359 | 110562712 | 1,19 | ENSRNOG00000004456 | RGD1307937 |
| P-STAT1 | 111075212 | 111075781 | 1,05 | ENSRNOG00000005434 | Sptbn1     |
| P-STAT1 | 112000271 | 112000605 | 0,91 | ENSRNOG00000022176 | Gpr75      |
| P-STAT1 | 112085448 | 112085919 | 1    | ENSRNOG00000007283 | Erlec1     |
| P-STAT1 | 2530120   | 2530758   | 0,88 | ENSRNOG00000013505 | Vdac2      |
| P-STAT1 | 2646252   | 2646652   | 0,97 | ENSRNOG00000013034 | Dupd1      |
| P-STAT1 | 3828308   | 3828677   | 0,97 | ENSRNOG00000009274 | Fut11      |
| P-STAT1 | 3851629   | 3851997   | 0,93 | ENSRNOG00000009042 | LOC685144  |
| P-STAT1 | 4143400   | 4143844   | 0,93 | ENSRNOG00000006898 | Mrps16     |
| P-STAT1 | 4149553   | 4149898   | 0,93 | ENSRNOG00000006619 | A8QIC3_RAT |
| P-STAT1 | 4150666   | 4151031   | 0,97 | ENSRNOG00000006619 | A8QIC3_RAT |
| P-STAT1 | 4153003   | 4153433   | 0,93 | ENSRNOG00000006619 | A8QIC3_RAT |
| P-STAT1 | 4285951   | 4286260   | 0,83 | ENSRNOG00000006422 | Kcnk16     |
| P-STAT1 | 8551795   | 8552332   | 1,16 | ENSRNOG00000032690 | Ube2e2     |
| P-STAT1 | 10760045  | 10760399  | 1,25 | ENSRNOG00000005993 | Oxsm       |
| P-STAT1 | 12124795  | 12125145  | 1,21 | ENSRNOG00000005957 | Slc4a7     |
| P-STAT1 | 13088734  | 13089173  | 1,02 | ENSRNOG00000027383 | Sntn       |
| P-STAT1 | 13316481  | 13316813  | 0,88 | ENSRNOG00000008203 | Synpr      |
| P-STAT1 | 18818347  | 18819499  | 1,48 | ENSRNOG00000008024 | Pxk        |
| P-STAT1 | 19343599  | 19344538  | 0,93 | ENSRNOG00000031535 | PD2RL_RAT  |
| P-STAT1 | 20204184  | 20204529  | 1,16 | ENSRNOG00000034156 | Ptger2     |
| P-STAT1 | 20876826  | 20877171  | 0,93 | ENSRNOG00000029502 | Ptger2     |
| P-STAT1 | 21208994  | 21209470  | 0,88 | ENSRNOG00000006462 | Ero1l      |
| P-STAT1 | 21216256  | 21216994  | 1,11 | ENSRNOG00000007203 | Psmc6      |
| P-STAT1 | 21281925  | 21282764  | 1,99 | ENSRNOG00000008641 | Gnpnat1    |
| P-STAT1 | 21570141  | 21570475  | 1,02 | ENSRNOG00000009481 | Ddhd1      |
| P-STAT1 | 25784356  | 25784791  | 1,21 | ENSRNOG00000031849 | RGD1310110 |
| P-STAT1 | 25958258  | 25958707  | 1,3  | ENSRNOG00000012526 | Olr1609    |
| P-STAT1 | 26005942  | 26006402  | 1,58 | ENSRNOG00000030806 | Olr1610    |
| P-STAT1 | 26033151  | 26033599  | 1,11 | ENSRNOG00000012545 | Olr1612    |

|         |          |          |      |                    |            |
|---------|----------|----------|------|--------------------|------------|
| P-STAT1 | 26073279 | 26073908 | 0,93 | ENSRNOG00000032368 | Tlr11      |
| P-STAT1 | 26162132 | 26162387 | 0,97 | ENSRNOG00000032305 | Olr1616    |
| P-STAT1 | 26398328 | 26398805 | 1,11 | ENSRNOG00000030709 | Olr1624    |
| P-STAT1 | 26464653 | 26465232 | 1,07 | ENSRNOG00000012497 | Olr1626    |
| P-STAT1 | 26505161 | 26505516 | 0,88 | ENSRNOG00000012510 | Olr1627    |
| P-STAT1 | 26638482 | 26639136 | 0,83 | ENSRNOG00000031895 | Olr1633    |
| P-STAT1 | 26792186 | 26792526 | 1,25 | ENSRNOG00000045340 | RNaseP_nuc |
| P-STAT1 | 27033706 | 27034042 | 1,02 | ENSRNOG00000039543 | Rnase11    |
| P-STAT1 | 27037920 | 27038449 | 0,97 | ENSRNOG00000042612 | Rnase12    |
| P-STAT1 | 27051475 | 27051929 | 0,93 | ENSRNOG00000025640 | Olr1637    |
| P-STAT1 | 27128531 | 27128897 | 0,97 | ENSRNOG00000031577 | Rnase1     |
| P-STAT1 | 27185182 | 27185631 | 1,21 | ENSRNOG00000043032 | Ang        |
| P-STAT1 | 27185182 | 27185631 | 1,21 | ENSRNOG00000030694 | Rnase112   |
| P-STAT1 | 27213202 | 27213641 | 1,07 | ENSRNOG00000032133 | Rnase2     |
| P-STAT1 | 27438600 | 27439236 | 1,07 | ENSRNOG00000011544 | Zfp219     |
| P-STAT1 | 27476226 | 27477090 | 1,02 | ENSRNOG00000011615 | Olr1638    |
| P-STAT1 | 27477646 | 27478275 | 1,02 | ENSRNOG00000011615 | Olr1638    |
| P-STAT1 | 27574353 | 27574697 | 0,88 | ENSRNOG00000011809 | Rpgrip1    |
| P-STAT1 | 27642825 | 27643310 | 1,07 | ENSRNOG00000011953 | Supt16h    |
| P-STAT1 | 27869359 | 27869728 | 0,93 | ENSRNOG00000039442 | Olr1641    |
| P-STAT1 | 27886943 | 27887292 | 1,16 | ENSRNOG00000039440 | Olr1642    |
| P-STAT1 | 27944682 | 27945031 | 1,07 | ENSRNOG00000039435 | Olr1644    |
| P-STAT1 | 27969093 | 27970143 | 1,11 | ENSRNOG00000039434 | Olr1645    |
| P-STAT1 | 32307023 | 32307487 | 0,88 | ENSRNOG00000009090 | Dad1       |
| P-STAT1 | 32489922 | 32490496 | 0,88 | ENSRNOG00000010947 | MMP14_RAT  |
| P-STAT1 | 32696992 | 32697361 | 1,48 | ENSRNOG00000013386 | Psmb5      |
| P-STAT1 | 33017560 | 33018391 | 1,11 | ENSRNOG00000016414 | Slc22a17   |
| P-STAT1 | 33094832 | 33095476 | 0,88 | ENSRNOG00000016983 | Myh7       |
| P-STAT1 | 33202023 | 33202475 | 1,48 | ENSRNOG00000018105 | Thtpa      |
| P-STAT1 | 33202023 | 33202475 | 1,48 | ENSRNOG00000025634 | Zfx2       |
| P-STAT1 | 33222455 | 33222812 | 1,07 | ENSRNOG00000025589 | Jph4       |
| P-STAT1 | 33719028 | 33719462 | 0,97 | ENSRNOG00000019162 | Fam158a    |
| P-STAT1 | 33728316 | 33728775 | 1,16 | ENSRNOG00000019438 | Rnf31      |
| P-STAT1 | 33728316 | 33728775 | 1,16 | ENSRNOG00000019246 | Psme2      |
| P-STAT1 | 33773163 | 33773700 | 0,97 | ENSRNOG00000019553 | Ipo4       |
| P-STAT1 | 33928341 | 33928670 | 1,48 | ENSRNOG00000020399 | Ltb4r      |
| P-STAT1 | 33946696 | 33947280 | 1,44 | ENSRNOG00000020401 | Adcy4      |
| P-STAT1 | 33955429 | 33955768 | 0,88 | ENSRNOG00000020465 | Ripk3      |
| P-STAT1 | 34028715 | 34029161 | 0,93 | ENSRNOG00000020503 | Cbln3      |
| P-STAT1 | 34028715 | 34029161 | 0,93 | ENSRNOG00000020506 | RGD1565688 |
| P-STAT1 | 34048109 | 34048467 | 1,02 | ENSRNOG00000020544 | RGD1309307 |
| P-STAT1 | 34551820 | 34552561 | 0,83 | ENSRNOG00000020625 | Mcpt2      |
| P-STAT1 | 35293218 | 35294174 | 0,83 | ENSRNOG00000020685 | Atp12a     |
| P-STAT1 | 36186767 | 36187218 | 1,67 | ENSRNOG00000022116 | Gjb6       |
| P-STAT1 | 36862763 | 36863103 | 1,02 | ENSRNOG00000010855 | Mrp63      |
| P-STAT1 | 40412308 | 40412662 | 1,25 | ENSRNOG00000014603 | Sgcg       |
| P-STAT1 | 40455541 | 40455975 | 1,07 | ENSRNOG00000014653 | Arl11      |
| P-STAT1 | 40456236 | 40456582 | 1,44 | ENSRNOG00000014653 | Arl11      |
| P-STAT1 | 40509656 | 40510092 | 1,16 | ENSRNOG00000014659 | Ebpl       |

|         |           |           |      |                    |            |
|---------|-----------|-----------|------|--------------------|------------|
| P-STAT1 | 42256134  | 42257071  | 0,93 | ENSRNOG00000038762 | Defb42     |
| P-STAT1 | 42264259  | 42264733  | 0,93 | ENSRNOG00000038760 | Defb41     |
| P-STAT1 | 42265674  | 42266408  | 0,88 | ENSRNOG00000038760 | Defb41     |
| P-STAT1 | 42315611  | 42316168  | 1,21 | ENSRNOG00000038758 | Defb30     |
| P-STAT1 | 43254919  | 43255451  | 1,21 | ENSRNOG00000012402 | RGD1565212 |
| P-STAT1 | 44427940  | 44428561  | 1,44 | ENSRNOG00000013581 | Extl3      |
| P-STAT1 | 44689705  | 44691060  | 1,25 | ENSRNOG00000014003 | Fbxo16     |
| P-STAT1 | 45080480  | 45081148  | 0,88 | ENSRNOG00000014398 | Scara5     |
| P-STAT1 | 45227086  | 45227720  | 1,11 | ENSRNOG00000015308 | Pbk        |
| P-STAT1 | 45255318  | 45255957  | 1,02 | ENSRNOG00000015921 | Esco2      |
| P-STAT1 | 45255318  | 45255957  | 1,02 | ENSRNOG00000015939 | Ccdc25     |
| P-STAT1 | 45566635  | 45567621  | 0,7  | ENSRNOG00000017424 | Chrna2     |
| P-STAT1 | 45727668  | 45728593  | 1,02 | ENSRNOG00000009449 | Trim35     |
| P-STAT1 | 45776725  | 45777239  | 1,02 | ENSRNOG00000009186 | Stmn4      |
| P-STAT1 | 45779804  | 45780348  | 0,97 | ENSRNOG00000009186 | Stmn4      |
| P-STAT1 | 46448636  | 46449185  | 1,02 | ENSRNOG00000009815 | Pnma2      |
| P-STAT1 | 46609910  | 46610266  | 1,07 | ENSRNOG00000011158 | Ppp2r2a    |
| P-STAT1 | 46776302  | 46776750  | 1,39 | ENSRNOG00000011548 | Ebf2       |
| P-STAT1 | 47633518  | 47634152  | 0,93 | ENSRNOG00000013658 | Nefl       |
| P-STAT1 | 47702296  | 47702835  | 0,93 | ENSRNOG00000013916 | Nefm       |
| P-STAT1 | 49567172  | 49567520  | 0,97 | ENSRNOG00000015075 | Stc1       |
| P-STAT1 | 49740977  | 49741526  | 1,02 | ENSRNOG00000015477 | Nkx3-1     |
| P-STAT1 | 49742032  | 49742506  | 1,02 | ENSRNOG00000015477 | Nkx3-1     |
| P-STAT1 | 50666193  | 50666857  | 0,83 | ENSRNOG00000009745 | Ppp3cc     |
| P-STAT1 | 50827438  | 50827782  | 1,07 | ENSRNOG00000009871 | Piwil2     |
| P-STAT1 | 50857072  | 50857398  | 1,3  | ENSRNOG00000010555 | Phyhip     |
| P-STAT1 | 50859375  | 50860045  | 1,44 | ENSRNOG00000010555 | Phyhip     |
| P-STAT1 | 51035771  | 51036243  | 0,97 | ENSRNOG00000012273 | Epb4.9     |
| P-STAT1 | 53790013  | 53790642  | 1,16 | ENSRNOG00000015054 | Rcbtb2     |
| P-STAT1 | 54156679  | 54157313  | 0,93 | ENSRNOG00000017170 | Med4       |
| P-STAT1 | 55554774  | 55555488  | 0,93 | ENSRNOG00000009512 | Esd        |
| P-STAT1 | 55790401  | 55791040  | 0,83 | ENSRNOG00000009412 | Lrch1      |
| P-STAT1 | 55791701  | 55792539  | 1,58 | ENSRNOG00000009412 | Lrch1      |
| P-STAT1 | 56035174  | 56035572  | 0,93 | ENSRNOG00000010319 | Lcp1       |
| P-STAT1 | 57027275  | 57027707  | 0,93 | ENSRNOG00000001037 | RGD1307254 |
| P-STAT1 | 57027275  | 57027707  | 0,93 | ENSRNOG00000001033 | Nufip1     |
| P-STAT1 | 60920324  | 60920757  | 1,11 | ENSRNOG00000012821 | Lect1      |
| P-STAT1 | 61268433  | 61268882  | 1,16 | ENSRNOG00000013280 | Olfm4      |
| P-STAT1 | 61379736  | 61380486  | 0,97 | ENSRNOG00000031061 | LOC306079  |
| P-STAT1 | 70769500  | 70770034  | 0,93 | ENSRNOG00000013306 | Pcdh20     |
| P-STAT1 | 82829578  | 82829928  | 1,72 | ENSRNOG00000024813 | LOC692032  |
| P-STAT1 | 82829578  | 82829928  | 1,72 | ENSRNOG00000024798 | RGD1309522 |
| P-STAT1 | 85624962  | 85625314  | 1,85 | ENSRNOG00000009530 | Uchl3      |
| P-STAT1 | 85627432  | 85627980  | 0,93 | ENSRNOG00000009530 | Uchl3      |
| P-STAT1 | 87898468  | 87898840  | 1,58 | ENSRNOG00000010997 | EdnrB      |
| P-STAT1 | 99916163  | 99916614  | 1,11 | ENSRNOG00000008631 | Gpc5       |
| P-STAT1 | 105570499 | 105570838 | 1,07 | ENSRNOG00000023687 | Q78P65_RAT |
| P-STAT1 | 106176615 | 106177557 | 1,02 | ENSRNOG00000011203 | Farp1      |
| P-STAT1 | 107020006 | 107020355 | 0,88 | ENSRNOG00000012628 | Gpr18      |

|         |           |           |      |                    |             |
|---------|-----------|-----------|------|--------------------|-------------|
| P-STAT1 | 107068243 | 107069203 | 0,93 | ENSRNOG00000025094 | Gpr183      |
| P-STAT1 | 107141179 | 107141706 | 0,88 | ENSRNOG00000013835 | Timm8a2     |
| P-STAT1 | 108785290 | 108785949 | 0,88 | ENSRNOG00000004516 | Itgbl1      |
| P-STAT1 | 1291224   | 1291778   | 0,92 | ENSRNOG00000010558 | Ppif        |
| P-STAT1 | 1983630   | 1983961   | 1,25 | ENSRNOG00000013264 | Pde12       |
| P-STAT1 | 5304840   | 5305174   | 1,02 | ENSRNOG00000014624 | Selk        |
| P-STAT1 | 5316721   | 5317264   | 1,52 | ENSRNOG00000015280 | Actr8       |
| P-STAT1 | 5345775   | 5346325   | 0,92 | ENSRNOG00000015859 | Chdh        |
| P-STAT1 | 6119898   | 6120127   | 0,97 | ENSRNOG00000016645 | Sfmbt1      |
| P-STAT1 | 6246964   | 6247318   | 1,06 | ENSRNOG00000017051 | Tmem110     |
| P-STAT1 | 6310921   | 6311549   | 0,88 | ENSRNOG00000017369 | Mustn1      |
| P-STAT1 | 6317643   | 6317988   | 0,92 | ENSRNOG00000017381 | Itih4       |
| P-STAT1 | 6427057   | 6427954   | 0,88 | ENSRNOG00000018075 | Spcs1       |
| P-STAT1 | 6427057   | 6427954   | 0,88 | ENSRNOG00000018179 | Glt8d1      |
| P-STAT1 | 6555770   | 6556129   | 1,29 | ENSRNOG00000018358 | Nt5dc2      |
| P-STAT1 | 6636723   | 6637055   | 1,16 | ENSRNOG00000018823 | NISCH_RAT   |
| P-STAT1 | 6636723   | 6637055   | 1,16 | ENSRNOG00000018943 | Tnnc1       |
| P-STAT1 | 6757821   | 6758255   | 0,88 | ENSRNOG00000026914 | DYH1_RAT    |
| P-STAT1 | 6783112   | 6783456   | 1,39 | ENSRNOG00000019273 | Capn7       |
| P-STAT1 | 6943353   | 6943822   | 1,06 | ENSRNOG00000019520 | Mettl6      |
| P-STAT1 | 7036529   | 7036976   | 1,2  | ENSRNOG00000019615 | COLQ_RAT    |
| P-STAT1 | 7548127   | 7548536   | 1,06 | ENSRNOG00000019727 | Dph3        |
| P-STAT1 | 7617476   | 7618165   | 1,16 | ENSRNOG00000039786 | Msemb       |
| P-STAT1 | 7641232   | 7641587   | 1,06 | ENSRNOG00000019768 | Ncoa4       |
| P-STAT1 | 7685434   | 7685769   | 1,66 | ENSRNOG00000019978 | Parg        |
| P-STAT1 | 7837971   | 7838230   | 0,83 | ENSRNOG00000019955 | Ogdhl       |
| P-STAT1 | 10258869  | 10259325  | 0,92 | ENSRNOG00000011600 | Opn4        |
| P-STAT1 | 18633658  | 18633987  | 1,29 | ENSRNOG00000000054 | Abhd8       |
| P-STAT1 | 18633658  | 18633987  | 1,29 | ENSRNOG00000017552 | Mrpl34      |
| P-STAT1 | 18808026  | 18808367  | 1,29 | ENSRNOG00000023317 | Glt25d1     |
| P-STAT1 | 18888859  | 18889311  | 1,25 | ENSRNOG00000018757 | Insl3       |
| P-STAT1 | 19311077  | 19311541  | 1,11 | ENSRNOG00000019661 | Gdf15       |
| P-STAT1 | 19607260  | 19607697  | 1,39 | ENSRNOG00000022368 | Ddx49       |
| P-STAT1 | 19774846  | 19775375  | 1,16 | ENSRNOG00000022247 | LOC361128   |
| P-STAT1 | 19868067  | 19868686  | 0,92 | ENSRNOG00000020510 | Sf4<sup>Tn( |
| P-STAT1 | 19868067  | 19868686  | 0,92 | ENSRNOG00000020526 | RGD1308759  |
| P-STAT1 | 20087684  | 20088118  | 1,16 | ENSRNOG00000010758 | Lpar2       |
| P-STAT1 | 23030698  | 23031447  | 0,92 | ENSRNOG00000013541 | Sh2d4a      |
| P-STAT1 | 23878085  | 23878534  | 1,02 | ENSRNOG00000014055 | Nat1        |
| P-STAT1 | 24567270  | 24567715  | 0,88 | ENSRNOG00000026403 | Naf1        |
| P-STAT1 | 24766000  | 24766259  | 0,83 | ENSRNOG00000014172 | Npy5r       |
| P-STAT1 | 24923061  | 24923522  | 0,88 | ENSRNOG00000014185 | Tktl2       |
| P-STAT1 | 25500392  | 25500854  | 1,39 | ENSRNOG00000026310 | 01-mar      |
| P-STAT1 | 26744812  | 26745171  | 0,92 | ENSRNOG00000043387 | Cpe         |
| P-STAT1 | 26746149  | 26746713  | 0,97 | ENSRNOG00000043387 | Cpe         |
| P-STAT1 | 29755329  | 29755977  | 1,48 | ENSRNOG00000029903 | Spock3      |
| P-STAT1 | 32769352  | 32770005  | 0,92 | ENSRNOG00000011775 | Mfap3l      |
| P-STAT1 | 34558148  | 34558626  | 1,2  | ENSRNOG00000038976 | Galntl6     |
| P-STAT1 | 36212930  | 36213659  | 0,92 | ENSRNOG00000013228 | Scrg1       |

|         |          |          |      |                    |           |
|---------|----------|----------|------|--------------------|-----------|
| P-STAT1 | 36214607 | 36215043 | 1,25 | ENSRNOG00000013228 | Scrg1     |
| P-STAT1 | 37741153 | 37741509 | 1,39 | ENSRNOG00000018072 | Gfra3     |
| P-STAT1 | 49542385 | 49543816 | 1,39 | ENSRNOG00000011178 | Lrp2bp    |
| P-STAT1 | 49668233 | 49668587 | 1,48 | ENSRNOG00000012658 | Pdlim3    |
| P-STAT1 | 54746323 | 54746767 | 0,88 | ENSRNOG00000010832 | PGFRL_RAT |
| P-STAT1 | 58924031 | 58924500 | 1,25 | ENSRNOG00000032376 | LOC683501 |
| P-STAT1 | 59835546 | 59836005 | 1,29 | ENSRNOG00000011407 | Pragmin   |
| P-STAT1 | 61800745 | 61801185 | 1,34 | ENSRNOG00000030102 | Mboat4    |
| P-STAT1 | 61800745 | 61801185 | 1,34 | ENSRNOG00000013254 | Dctn6     |
| P-STAT1 | 68983623 | 68984462 | 1,2  | ENSRNOG00000012218 | Poteg     |
| P-STAT1 | 68985189 | 68985828 | 0,92 | ENSRNOG00000012218 | Poteg     |
| P-STAT1 | 69072277 | 69072621 | 0,97 | ENSRNOG00000012448 | Chrn3     |
| P-STAT1 | 69181702 | 69182049 | 0,88 | ENSRNOG00000038473 | Got11     |
| P-STAT1 | 69359798 | 69360137 | 1,8  | ENSRNOG00000013763 | Erlin2    |
| P-STAT1 | 70648258 | 70648838 | 0,88 | ENSRNOG00000015052 | Star      |
| P-STAT1 | 70649368 | 70649726 | 1,29 | ENSRNOG00000015052 | Star      |
| P-STAT1 | 70650809 | 70651164 | 1,29 | ENSRNOG00000015052 | Star      |
| P-STAT1 | 70727503 | 70727845 | 2,22 | ENSRNOG00000015568 | Ppapdc1b  |
| P-STAT1 | 70841054 | 70841696 | 1,02 | ENSRNOG00000015621 | Whsc11i   |
| P-STAT1 | 70841054 | 70841696 | 1,02 | ENSRNOG00000026180 | LETM2_RAT |
| P-STAT1 | 71421626 | 71422266 | 0,92 | ENSRNOG00000034140 | Htra4     |
| P-STAT1 | 71424296 | 71424628 | 1,02 | ENSRNOG00000034140 | Htra4     |
| P-STAT1 | 73242056 | 73242416 | 1,71 | ENSRNOG00000018040 | Gins4     |
| P-STAT1 | 73438480 | 73439114 | 0,97 | ENSRNOG00000018241 | Ank1      |
| P-STAT1 | 73801710 | 73802249 | 1,02 | ENSRNOG00000019073 | Ikbkb     |
| P-STAT1 | 73891628 | 73891962 | 1,11 | ENSRNOG00000019267 | Dkk4      |
| P-STAT1 | 74403108 | 74403383 | 1,34 | ENSRNOG00000024837 | Tpte      |
| P-STAT1 | 74404076 | 74404405 | 1,06 | ENSRNOG00000024837 | Tpte      |
| P-STAT1 | 74947571 | 74948140 | 1,2  | ENSRNOG00000033972 | Defb50    |
| P-STAT1 | 75117566 | 75117922 | 0,88 | ENSRNOG00000038139 | Defa8     |
| P-STAT1 | 75323973 | 75324452 | 1,11 | ENSRNOG00000038133 | Defa11    |
| P-STAT1 | 75358109 | 75358739 | 1,16 | ENSRNOG00000038130 | Defb51    |
| P-STAT1 | 75360292 | 75360660 | 1,06 | ENSRNOG00000038130 | Defb51    |
| P-STAT1 | 75604107 | 75605340 | 1,06 | ENSRNOG00000033538 | Defb40    |
| P-STAT1 | 75790237 | 75790811 | 0,97 | ENSRNOG00000028623 | Agpat5    |
| P-STAT1 | 80993082 | 80993646 | 0,97 | ENSRNOG00000018430 | Grk1      |
| P-STAT1 | 80997742 | 80998088 | 0,88 | ENSRNOG00000018543 | Atp4b     |
| P-STAT1 | 81057320 | 81057655 | 0,88 | ENSRNOG00000019222 | MGC112830 |
| P-STAT1 | 81058519 | 81058864 | 0,92 | ENSRNOG00000019222 | MGC112830 |
| P-STAT1 | 81138999 | 81139473 | 1,16 | ENSRNOG00000019504 | ARHL1_RAT |
| P-STAT1 | 81232874 | 81233423 | 1,06 | ENSRNOG00000019629 | LAMP1_RAT |
| P-STAT1 | 81349477 | 81349840 | 0,97 | ENSRNOG00000033444 | F10       |
| P-STAT1 | 81469417 | 81469766 | 1,85 | ENSRNOG00000028426 | Mcf2l     |
| P-STAT1 | 81627333 | 81627985 | 1,16 | ENSRNOG00000017154 | Atp11a    |
| P-STAT1 | 82869190 | 82870370 | 1,02 | ENSRNOG00000023991 | Rab20     |
| P-STAT1 | 83041711 | 83042072 | 2,26 | ENSRNOG00000016281 | Col4a1    |
| P-STAT1 | 84883671 | 84884284 | 1,25 | ENSRNOG00000014598 | Abhd13    |
| P-STAT1 | 118822   | 119186   | 1,28 | ENSRNOG00000012720 | Irx4      |
| P-STAT1 | 1388738  | 1389102  | 0,87 | ENSRNOG00000033609 | Irx1      |

|         |          |          |      |                    |             |
|---------|----------|----------|------|--------------------|-------------|
| P-STAT1 | 3630516  | 3631170  | 1,1  | ENSRNOG00000017150 | Med10       |
| P-STAT1 | 5089552  | 5090200  | 0,83 | ENSRNOG00000027422 | Fastkd3     |
| P-STAT1 | 5162476  | 5163120  | 1,1  | ENSRNOG00000045065 | U7          |
| P-STAT1 | 5503667  | 5504221  | 1,05 | ENSRNOG00000018492 | Olr1652     |
| P-STAT1 | 5723458  | 5723898  | 0,96 | ENSRNOG00000018202 | Fam75a4     |
| P-STAT1 | 7628437  | 7629089  | 0,83 | ENSRNOG00000017505 | Npepo       |
| P-STAT1 | 7794262  | 7794616  | 0,92 | ENSRNOG00000017597 | F16P1_RAT   |
| P-STAT1 | 9092384  | 9092813  | 1,15 | ENSRNOG00000033540 | Cts7        |
| P-STAT1 | 9179211  | 9179773  | 1,01 | ENSRNOG00000040000 | Cts8        |
| P-STAT1 | 10843916 | 10844345 | 1,6  | ENSRNOG00000027014 | RGD1565972  |
| P-STAT1 | 11039939 | 11040307 | 0,87 | ENSRNOG00000018651 | Agtppb1     |
| P-STAT1 | 14453127 | 14453483 | 0,96 | ENSRNOG00000011523 | H2afy       |
| P-STAT1 | 14883169 | 14883716 | 0,92 | ENSRNOG00000011374 | Catsper3    |
| P-STAT1 | 15045332 | 15045952 | 0,87 | ENSRNOG00000021911 | Camlg       |
| P-STAT1 | 15153058 | 15153807 | 0,83 | ENSRNOG00000013564 | Dok3        |
| P-STAT1 | 15250180 | 15250529 | 1,01 | ENSRNOG00000015139 | F12         |
| P-STAT1 | 15355173 | 15355722 | 1,19 | ENSRNOG00000016410 | Prelid1     |
| P-STAT1 | 15728694 | 15729143 | 1,15 | ENSRNOG00000025920 | Unc5a       |
| P-STAT1 | 15904915 | 15906123 | 1,1  | ENSRNOG00000018039 | Sncb        |
| P-STAT1 | 16060625 | 16061017 | 1,28 | ENSRNOG00000017506 | Cltb        |
| P-STAT1 | 16499089 | 16499547 | 1,79 | ENSRNOG00000018260 | Hrh2        |
| P-STAT1 | 19999622 | 20000386 | 1,15 | ENSRNOG00000011119 | Spin1       |
| P-STAT1 | 20969896 | 20970353 | 1,65 | ENSRNOG00000014818 | Nol8        |
| P-STAT1 | 20969896 | 20970353 | 1,65 | ENSRNOG00000015545 | Cenpp       |
| P-STAT1 | 21188252 | 21188681 | 1,01 | ENSRNOG00000015631 | Ippk        |
| P-STAT1 | 22031730 | 22032592 | 0,87 | ENSRNOG00000026564 | Ptpdc1      |
| P-STAT1 | 23632873 | 23633222 | 0,87 | ENSRNOG00000016152 | Dek         |
| P-STAT1 | 23697243 | 23697594 | 0,96 | ENSRNOG00000016519 | Aof1        |
| P-STAT1 | 26724424 | 26724773 | 1,42 | ENSRNOG00000018092 | Cd83        |
| P-STAT1 | 26904101 | 26904559 | 1,05 | ENSRNOG00000018070 | Rnf182      |
| P-STAT1 | 29305231 | 29305680 | 1,01 | ENSRNOG00000014548 | Nedd9       |
| P-STAT1 | 29446678 | 29447127 | 1,01 | ENSRNOG00000043288 | LOC690806   |
| P-STAT1 | 29707078 | 29707402 | 0,96 | ENSRNOG00000015437 | Tmem14c     |
| P-STAT1 | 29710721 | 29711075 | 1,19 | ENSRNOG00000015437 | Tmem14c     |
| P-STAT1 | 33015997 | 33017451 | 0,96 | ENSRNOG00000014049 | Riok1       |
| P-STAT1 | 33015997 | 33017451 | 0,96 | ENSRNOG00000024111 | Cage1       |
| P-STAT1 | 34090094 | 34090446 | 1,51 | ENSRNOG00000015957 | F13a1       |
| P-STAT1 | 34093190 | 34093639 | 1,19 | ENSRNOG00000015957 | F13a1       |
| P-STAT1 | 36196567 | 36197003 | 1,01 | ENSRNOG00000016369 | Peci        |
| P-STAT1 | 36296453 | 36297029 | 1,24 | ENSRNOG00000033763 | CF201_RAT   |
| P-STAT1 | 36296453 | 36297029 | 1,24 | ENSRNOG00000016672 | 1700026J04R |
| P-STAT1 | 37085592 | 37086556 | 1,15 | ENSRNOG00000017445 | Tubb2b      |
| P-STAT1 | 37181616 | 37182075 | 1,47 | ENSRNOG00000017577 | Bphl        |
| P-STAT1 | 37312731 | 37313181 | 0,96 | ENSRNOG00000017962 | Serpinb6a   |
| P-STAT1 | 37641921 | 37642390 | 0,92 | ENSRNOG00000022139 | Serpinb9e   |
| P-STAT1 | 37643431 | 37643785 | 1,05 | ENSRNOG00000022139 | Serpinb9e   |
| P-STAT1 | 37792484 | 37792948 | 1,42 | ENSRNOG00000033772 | Serpinb9    |
| P-STAT1 | 37794404 | 37794749 | 1,01 | ENSRNOG00000033772 | Serpinb9    |
| P-STAT1 | 38021788 | 38022137 | 1,19 | ENSRNOG00000021789 | LOC691300   |

|         |          |          |      |                    |            |
|---------|----------|----------|------|--------------------|------------|
| P-STAT1 | 42991154 | 42991598 | 1,19 | ENSRNOG00000039075 | PrI5a2     |
| P-STAT1 | 43126606 | 43126975 | 1,28 | ENSRNOG00000016307 | PrI5a1     |
| P-STAT1 | 43287280 | 43288179 | 0,92 | ENSRNOG00000016436 | PR4A1_RAT  |
| P-STAT1 | 43723030 | 43723459 | 1,05 | ENSRNOG00000029126 | PrI7a4     |
| P-STAT1 | 43915630 | 43915971 | 1,1  | ENSRNOG00000016792 | PrI3d4     |
| P-STAT1 | 44272223 | 44272565 | 1,38 | ENSRNOG00000017089 | PrI6a1     |
| P-STAT1 | 44708293 | 44708667 | 1,01 | ENSRNOG00000017374 | PrI        |
| P-STAT1 | 46856202 | 46856765 | 1,74 | ENSRNOG00000017444 | Nrsn1      |
| P-STAT1 | 46857587 | 46857943 | 1,65 | ENSRNOG00000017444 | Nrsn1      |
| P-STAT1 | 47303656 | 47304062 | 1,38 | ENSRNOG00000018246 | Ttrap      |
| P-STAT1 | 47305934 | 47306189 | 1,74 | ENSRNOG00000018246 | Ttrap      |
| P-STAT1 | 48225150 | 48225505 | 0,87 | ENSRNOG00000016628 | Scgn       |
| P-STAT1 | 48292802 | 48293349 | 1,42 | ENSRNOG00000033377 | Hist1h2aa  |
| P-STAT1 | 48462109 | 48462469 | 0,87 | ENSRNOG00000042444 | B2BF95_RAT |
| P-STAT1 | 48462109 | 48462469 | 0,87 | ENSRNOG00000022451 | Hist1h1t   |
| P-STAT1 | 48897700 | 48898041 | 1,1  | ENSRNOG00000017585 | Abt1       |
| P-STAT1 | 48978550 | 48979026 | 1,28 | ENSRNOG00000017318 | Zfp322a    |
| P-STAT1 | 50120233 | 50120870 | 0,96 | ENSRNOG00000032499 | LOC682649  |
| P-STAT1 | 50120233 | 50120870 | 0,96 | ENSRNOG00000030526 | LOC680312  |
| P-STAT1 | 50145630 | 50145978 | 1,47 | ENSRNOG00000017713 | Prss16     |
| P-STAT1 | 50351503 | 50351878 | 1,15 | ENSRNOG00000038837 | Hist1h2bn  |
| P-STAT1 | 50351503 | 50351878 | 1,15 | ENSRNOG00000038836 | LOC684872  |
| P-STAT1 | 50351503 | 50351878 | 1,15 | ENSRNOG00000042585 | LOC680498  |
| P-STAT1 | 50602368 | 50603117 | 0,96 | ENSRNOG00000030274 | Olr1658    |
| P-STAT1 | 54327820 | 54328154 | 1,15 | ENSRNOG00000013237 | A1A5R6_RAT |
| P-STAT1 | 55017334 | 55018273 | 1,01 | ENSRNOG00000013454 | Rala       |
| P-STAT1 | 59793547 | 59794100 | 1,24 | ENSRNOG00000017791 | Arhgap12   |
| P-STAT1 | 60667089 | 60667558 | 1,01 | ENSRNOG00000028329 | Zfp438     |
| P-STAT1 | 61870241 | 61870801 | 0,92 | ENSRNOG00000016578 | Papd1      |
| P-STAT1 | 62661046 | 62661670 | 1,24 | ENSRNOG00000016066 | Bambi      |
| P-STAT1 | 68587564 | 68587953 | 1,01 | ENSRNOG00000018046 | LEG8_RAT   |
| P-STAT1 | 68588414 | 68588753 | 0,92 | ENSRNOG00000018046 | LEG8_RAT   |
| P-STAT1 | 69585464 | 69585808 | 2,11 | ENSRNOG00000027506 | Zp4        |
| P-STAT1 | 77158254 | 77159113 | 1,01 | ENSRNOG00000038319 | Akr1c19    |
| P-STAT1 | 77266345 | 77266984 | 1,28 | ENSRNOG00000017531 | Akr1c18    |
| P-STAT1 | 77780559 | 77781202 | 1,19 | ENSRNOG00000017967 | Asb13      |
| P-STAT1 | 79741124 | 79741468 | 1,47 | ENSRNOG00000040827 | SNORA17    |
| P-STAT1 | 79741124 | 79741468 | 1,47 | ENSRNOG00000026690 | Kin        |
| P-STAT1 | 82705342 | 82705799 | 1,1  | ENSRNOG00000023661 | Cugbp2     |
| P-STAT1 | 83376230 | 83376589 | 1,88 | ENSRNOG00000023593 | Upf2       |
| P-STAT1 | 83521766 | 83522240 | 1,01 | ENSRNOG00000017741 | Nudt5      |
| P-STAT1 | 84393738 | 84394092 | 0,96 | ENSRNOG00000017987 | UCMA_RAT   |
| P-STAT1 | 85665069 | 85665423 | 1,28 | ENSRNOG00000014886 | Fam107b    |
| P-STAT1 | 85995466 | 85995815 | 1,24 | ENSRNOG00000016403 | Olah       |
| P-STAT1 | 86081847 | 86082523 | 0,83 | ENSRNOG00000026248 | Nmt2       |
| P-STAT1 | 87208683 | 87209144 | 1,01 | ENSRNOG00000017328 | Pter       |
| P-STAT1 | 87771017 | 87771259 | 1,01 | ENSRNOG00000029047 | Cubn       |
| P-STAT1 | 87773768 | 87774325 | 1,01 | ENSRNOG00000029047 | Cubn       |
| P-STAT1 | 88072673 | 88073206 | 1,01 | ENSRNOG00000018171 | St8sia6    |

|         |          |          |      |                    |              |
|---------|----------|----------|------|--------------------|--------------|
| P-STAT1 | 88253791 | 88254427 | 0,96 | ENSRNOG00000043192 | LOC683916    |
| P-STAT1 | 88849272 | 88849825 | 0,96 | ENSRNOG00000018378 | Cacnb2       |
| P-STAT1 | 92782381 | 92782839 | 0,96 | ENSRNOG00000016585 | Bmi1         |
| P-STAT1 | 93415864 | 93416409 | 1,19 | ENSRNOG00000016873 | Msrb2        |
| P-STAT1 | 96258874 | 96259332 | 1,33 | ENSRNOG00000018200 | Gad2         |
| P-STAT1 | 96760398 | 96761045 | 0,87 | ENSRNOG00000017569 | Mastl        |
| P-STAT1 | 1254474  | 1254868  | 1,07 | ENSRNOG00000015332 | Thoc1        |
| P-STAT1 | 1329433  | 1330057  | 1,07 | ENSRNOG00000014981 | Usp14        |
| P-STAT1 | 1999400  | 2000149  | 0,84 | ENSRNOG00000013714 | Snrpd1       |
| P-STAT1 | 2082656  | 2083220  | 1,25 | ENSRNOG00000029370 | Abhd3        |
| P-STAT1 | 3671076  | 3672317  | 0,88 | ENSRNOG00000023376 | Riok3        |
| P-STAT1 | 3701091  | 3701426  | 1,39 | ENSRNOG00000012597 | RGD1311805   |
| P-STAT1 | 6642183  | 6642676  | 0,97 | ENSRNOG00000016043 | Aqp4         |
| P-STAT1 | 11981464 | 11982960 | 1,16 | ENSRNOG00000017031 | Dsc1         |
| P-STAT1 | 12761502 | 12762047 | 1,21 | ENSRNOG00000015645 | Rnf138       |
| P-STAT1 | 15747956 | 15748439 | 1,07 | ENSRNOG00000016652 | Zfp35        |
| P-STAT1 | 16372134 | 16372489 | 1,11 | ENSRNOG00000015301 | Elp2         |
| P-STAT1 | 23814441 | 23814779 | 1,3  | ENSRNOG00000017333 | Syt4         |
| P-STAT1 | 24333669 | 24334113 | 2,09 | ENSRNOG00000016216 | Sft2d3       |
| P-STAT1 | 24336505 | 24336854 | 1,72 | ENSRNOG00000016216 | Sft2d3       |
| P-STAT1 | 24377604 | 24378159 | 1,07 | ENSRNOG00000025745 | Gpr17        |
| P-STAT1 | 24576369 | 24576951 | 1,16 | ENSRNOG00000014376 | Proc<i><sup> |
| P-STAT1 | 25010222 | 25010656 | 0,93 | ENSRNOG00000029939 | Gypc         |
| P-STAT1 | 25656355 | 25656789 | 0,93 | ENSRNOG00000020468 | Stard4       |
| P-STAT1 | 25870920 | 25871457 | 1,21 | ENSRNOG00000020467 | Nrep         |
| P-STAT1 | 25870920 | 25871457 | 1,21 | ENSRNOG00000039719 | Gm10549      |
| P-STAT1 | 26847240 | 26847589 | 1,07 | ENSRNOG00000020167 | Reep5        |
| P-STAT1 | 26875457 | 26875934 | 1,35 | ENSRNOG00000025489 | Pkd2l2       |
| P-STAT1 | 27003778 | 27004247 | 1,21 | ENSRNOG00000020157 | Wnt8a        |
| P-STAT1 | 27198156 | 27198514 | 1,11 | ENSRNOG00000020309 | Gfra3        |
| P-STAT1 | 27730443 | 27730788 | 0,93 | ENSRNOG00000019732 | Lrrtm2       |
| P-STAT1 | 27958454 | 27958883 | 1,02 | ENSRNOG00000019826 | Sil1         |
| P-STAT1 | 27960284 | 27960635 | 0,88 | ENSRNOG00000019826 | Sil1         |
| P-STAT1 | 28252575 | 28253019 | 1,07 | ENSRNOG00000019938 | Slc23a1      |
| P-STAT1 | 28322082 | 28322720 | 1,35 | ENSRNOG00000019995 | Dnajc18      |
| P-STAT1 | 28425271 | 28425736 | 0,97 | ENSRNOG00000044988 | U6atac       |
| P-STAT1 | 28482922 | 28483461 | 0,88 | ENSRNOG00000032878 | LOC681300    |
| P-STAT1 | 29154424 | 29154774 | 1,16 | ENSRNOG00000018646 | Hbegf        |
| P-STAT1 | 29312988 | 29313414 | 0,88 | ENSRNOG0000002908  | Slc35a4      |
| P-STAT1 | 29312988 | 29313414 | 0,88 | ENSRNOG00000018089 | Sra1         |
| P-STAT1 | 29316848 | 29317222 | 1,67 | ENSRNOG0000002908  | Slc35a4      |
| P-STAT1 | 29316848 | 29317222 | 1,67 | ENSRNOG00000017849 | Apbb3        |
| P-STAT1 | 29467882 | 29468241 | 1,95 | ENSRNOG00000016894 | Dnd1         |
| P-STAT1 | 29470112 | 29470651 | 1,39 | ENSRNOG00000016894 | Dnd1         |
| P-STAT1 | 29471217 | 29471615 | 0,97 | ENSRNOG00000016894 | Dnd1         |
| P-STAT1 | 30115148 | 30115494 | 1,21 | ENSRNOG00000027469 | Pcdhb4       |
| P-STAT1 | 30149079 | 30149627 | 1,16 | ENSRNOG00000029244 | Pcdhb6       |
| P-STAT1 | 30150404 | 30151134 | 0,88 | ENSRNOG00000029244 | Pcdhb6       |
| P-STAT1 | 30166490 | 30166939 | 1,02 | ENSRNOG00000020073 | Pcdhb8       |

|         |          |          |      |                    |             |
|---------|----------|----------|------|--------------------|-------------|
| P-STAT1 | 30312318 | 30312689 | 0,97 | ENSRNOG00000044274 | SNORA31     |
| P-STAT1 | 30312318 | 30312689 | 0,97 | ENSRNOG00000033123 | Pcdhb20     |
| P-STAT1 | 30322975 | 30323532 | 0,88 | ENSRNOG00000020028 | Pcdhb22     |
| P-STAT1 | 30322975 | 30323532 | 0,88 | ENSRNOG00000033479 | Pcdhb21     |
| P-STAT1 | 30622092 | 30622554 | 1,76 | ENSRNOG00000027290 | Pcdhga7     |
| P-STAT1 | 30634426 | 30634951 | 1,02 | ENSRNOG00000027277 | Pcdhga8     |
| P-STAT1 | 30673246 | 30673990 | 0,84 | ENSRNOG00000019799 | Pcdhgc3     |
| P-STAT1 | 30874563 | 30875017 | 1,02 | ENSRNOG00000019618 | HDAC3_RAT   |
| P-STAT1 | 30874563 | 30875017 | 1,02 | ENSRNOG00000019575 | Rel2        |
| P-STAT1 | 30893081 | 30893479 | 1,07 | ENSRNOG00000039415 | Fchsd1      |
| P-STAT1 | 31179153 | 31179897 | 1,44 | ENSRNOG00000019276 | RGD735029   |
| P-STAT1 | 31934043 | 31934388 | 1,39 | ENSRNOG00000013920 | Arhgap26    |
| P-STAT1 | 32753397 | 32754575 | 1,39 | ENSRNOG00000014527 | Pabpc2      |
| P-STAT1 | 35599513 | 35599855 | 1,67 | ENSRNOG00000018842 | Pou4f3      |
| P-STAT1 | 35780913 | 35781667 | 0,93 | ENSRNOG00000027103 | Gpr151      |
| P-STAT1 | 35782403 | 35782782 | 1,67 | ENSRNOG00000027103 | Gpr151      |
| P-STAT1 | 37999738 | 38000303 | 0,88 | ENSRNOG00000011770 | Myot        |
| P-STAT1 | 40943201 | 40943665 | 0,93 | ENSRNOG00000000157 | Atg12       |
| P-STAT1 | 40943201 | 40943665 | 0,93 | ENSRNOG00000003829 | Ap3s1       |
| P-STAT1 | 41668199 | 41669173 | 1,02 | ENSRNOG00000004033 | Sema6a      |
| P-STAT1 | 45079586 | 45080040 | 1,49 | ENSRNOG00000026136 | Tnfaip8     |
| P-STAT1 | 45155167 | 45156628 | 1,67 | ENSRNOG00000015840 | Hsd17b4     |
| P-STAT1 | 47678375 | 47678909 | 0,93 | ENSRNOG00000014988 | Ftmt        |
| P-STAT1 | 47971559 | 47972508 | 0,97 | ENSRNOG00000014426 | Lox         |
| P-STAT1 | 47971559 | 47972508 | 0,97 | ENSRNOG00000018724 | Znf474      |
| P-STAT1 | 54351742 | 54352287 | 1,02 | ENSRNOG00000019733 | Slc27a6     |
| P-STAT1 | 54469678 | 54470032 | 1,21 | ENSRNOG00000019711 | Isoc1       |
| P-STAT1 | 54657457 | 54658391 | 1,49 | ENSRNOG00000019577 | Adamts19    |
| P-STAT1 | 56249688 | 56250289 | 1,07 | ENSRNOG00000019542 | MGC108823   |
| P-STAT1 | 56754079 | 56754870 | 0,97 | ENSRNOG00000018735 | Cd74        |
| P-STAT1 | 57383042 | 57383376 | 0,93 | ENSRNOG00000017503 | Ppargc1b    |
| P-STAT1 | 58177434 | 58177889 | 1,02 | ENSRNOG00000019217 | Adrb2       |
| P-STAT1 | 59118109 | 59118658 | 1,07 | ENSRNOG00000018914 | Napg        |
| P-STAT1 | 59851978 | 59852623 | 1,3  | ENSRNOG00000018818 | Txn1l       |
| P-STAT1 | 60734988 | 60735619 | 0,97 | ENSRNOG00000017852 | Nars        |
| P-STAT1 | 60829728 | 60830087 | 1,16 | ENSRNOG00000024952 | Atp8b1      |
| P-STAT1 | 60832333 | 60832697 | 0,97 | ENSRNOG00000024952 | Atp8b1      |
| P-STAT1 | 61869464 | 61870017 | 1,3  | ENSRNOG00000017116 | Znf532      |
| P-STAT1 | 62563221 | 62563575 | 0,97 | ENSRNOG00000016944 | Rax         |
| P-STAT1 | 66623886 | 66624442 | 1,07 | ENSRNOG00000021381 | Ccdc68      |
| P-STAT1 | 66748246 | 66748913 | 0,97 | ENSRNOG00000012176 | Rab27b      |
| P-STAT1 | 67232358 | 67232789 | 1,21 | ENSRNOG00000012111 | Poli        |
| P-STAT1 | 69143507 | 69143858 | 1,3  | ENSRNOG00000033099 | Dcc<sup>Tn( |
| P-STAT1 | 71863495 | 71863933 | 0,93 | ENSRNOG00000018680 | Rpl17       |
| P-STAT1 | 71863495 | 71863933 | 0,93 | ENSRNOG00000035340 | SNORD58     |
| P-STAT1 | 71863495 | 71863933 | 0,93 | ENSRNOG00000034339 | SNORD58     |
| P-STAT1 | 71863495 | 71863933 | 0,93 | ENSRNOG00000035792 | SNORD58     |
| P-STAT1 | 71863495 | 71863933 | 0,93 | ENSRNOG00000018676 | RGD1562987  |
| P-STAT1 | 74733626 | 74733980 | 2,09 | ENSRNOG00000017067 | Haus1       |

|         |          |          |      |                    |            |
|---------|----------|----------|------|--------------------|------------|
| P-STAT1 | 74733626 | 74733980 | 2,09 | ENSRNOG00000017032 | Atp5a1     |
| P-STAT1 | 78877231 | 78878086 | 1,07 | ENSRNOG00000016654 | Galr1      |
| P-STAT1 | 78941886 | 78942900 | 1,16 | ENSRNOG00000016516 | MBP_RAT    |
| P-STAT1 | 82888674 | 82889428 | 2,23 | ENSRNOG00000014006 | Neto1      |
| P-STAT1 | 269218   | 269660   | 1    | ENSRNOG00000011901 | Rrad       |
| P-STAT1 | 277882   | 278536   | 1    | ENSRNOG00000012222 | Cdh16      |
| P-STAT1 | 280107   | 280461   | 1,45 | ENSRNOG00000012222 | Cdh16      |
| P-STAT1 | 9808764  | 9809298  | 1    | ENSRNOG00000012447 | Setd6      |
| P-STAT1 | 9809855  | 9810192  | 0,91 | ENSRNOG00000012447 | Setd6      |
| P-STAT1 | 10373793 | 10374262 | 1,04 | ENSRNOG00000014626 | Katnb1     |
| P-STAT1 | 10606513 | 10606952 | 1,04 | ENSRNOG00000015720 | Polr2c     |
| P-STAT1 | 10677167 | 10677725 | 0,91 | ENSRNOG00000016326 | Cx3cl1     |
| P-STAT1 | 10844266 | 10844921 | 0,91 | ENSRNOG00000017841 | Q6AY90_RAT |
| P-STAT1 | 10844266 | 10844921 | 0,91 | ENSRNOG00000034948 | SNORA5     |
| P-STAT1 | 11050441 | 11050785 | 1    | ENSRNOG00000018796 | Herpud1    |
| P-STAT1 | 11346612 | 11346951 | 1    | ENSRNOG00000019020 | Bbs2       |
| P-STAT1 | 12496696 | 12497255 | 0,86 | ENSRNOG00000013742 | Large      |
| P-STAT1 | 14304310 | 14304669 | 1,31 | ENSRNOG00000000663 | Tfip11     |
| P-STAT1 | 14322774 | 14324240 | 1,09 | ENSRNOG00000000662 | Srrd       |
| P-STAT1 | 14322774 | 14324240 | 1,09 | ENSRNOG00000000661 | Hps4       |
| P-STAT1 | 14558511 | 14559041 | 1,18 | ENSRNOG00000025612 | RGD1563628 |
| P-STAT1 | 14888562 | 14888911 | 1,45 | ENSRNOG00000015438 | LOC683107  |
| P-STAT1 | 16856813 | 16857188 | 1,45 | ENSRNOG00000011829 | Rpgrip1l   |
| P-STAT1 | 16860008 | 16860803 | 1,22 | ENSRNOG00000011829 | Rpgrip1l   |
| P-STAT1 | 16860008 | 16860803 | 1,22 | ENSRNOG00000011728 | Fto        |
| P-STAT1 | 17030961 | 17031422 | 1,13 | ENSRNOG00000011956 | Fts        |
| P-STAT1 | 17941469 | 17941824 | 0,86 | ENSRNOG00000028649 | Tox3       |
| P-STAT1 | 19273884 | 19274346 | 1    | ENSRNOG00000013907 | Sall1      |
| P-STAT1 | 20020055 | 20020681 | 0,91 | ENSRNOG00000014419 | Brd7       |
| P-STAT1 | 22849765 | 22850207 | 0,95 | ENSRNOG00000044313 | 7SK        |
| P-STAT1 | 22849765 | 22850207 | 0,95 | ENSRNOG00000016251 | Dnaja2     |
| P-STAT1 | 22984953 | 22985421 | 0,86 | ENSRNOG00000017090 | RGD1308706 |
| P-STAT1 | 23066133 | 23066603 | 1,04 | ENSRNOG00000017546 | Mylk3      |
| P-STAT1 | 23196504 | 23197070 | 0,86 | ENSRNOG00000017868 | Olr1666    |
| P-STAT1 | 24754443 | 24754801 | 1,18 | ENSRNOG00000004212 | Fbxw9      |
| P-STAT1 | 24776803 | 24777245 | 0,91 | ENSRNOG00000003970 | Tnpo2      |
| P-STAT1 | 24782411 | 24783159 | 1,95 | ENSRNOG00000003747 | Asna1      |
| P-STAT1 | 24795948 | 24796275 | 0,86 | ENSRNOG00000003737 | Best2      |
| P-STAT1 | 24962982 | 24963416 | 1,22 | ENSRNOG00000003029 | Calr       |
| P-STAT1 | 25587759 | 25588104 | 0,91 | ENSRNOG00000026211 | Mri1       |
| P-STAT1 | 25736678 | 25737241 | 0,86 | ENSRNOG00000006551 | RGD1304881 |
| P-STAT1 | 25794159 | 25794518 | 2,04 | ENSRNOG00000005747 | Il27ra     |
| P-STAT1 | 26501324 | 26502269 | 1,18 | ENSRNOG00000028176 | Elmod2     |
| P-STAT1 | 27047293 | 27047841 | 1,86 | ENSRNOG00000003461 | Zfp330     |
| P-STAT1 | 27930857 | 27931115 | 1,04 | ENSRNOG00000018377 | LOC365709  |
| P-STAT1 | 31029867 | 31030316 | 0,86 | ENSRNOG00000011991 | Slc10a7    |
| P-STAT1 | 32157628 | 32158157 | 1,27 | ENSRNOG00000012860 | Tmem184c   |
| P-STAT1 | 32158826 | 32159154 | 0,95 | ENSRNOG00000012860 | Tmem184c   |
| P-STAT1 | 34882993 | 34883427 | 1,31 | ENSRNOG00000013808 | RGD1308358 |

|         |          |          |      |                    |             |
|---------|----------|----------|------|--------------------|-------------|
| P-STAT1 | 35094413 | 35094852 | 1,09 | ENSRNOG00000015588 | Nol3        |
| P-STAT1 | 35109816 | 35110255 | 1,18 | ENSRNOG00000015641 | Exoc3l      |
| P-STAT1 | 35109816 | 35110255 | 1,18 | ENSRNOG00000015708 | E2f4        |
| P-STAT1 | 35118007 | 35118666 | 0,95 | ENSRNOG00000015800 | Elmo3       |
| P-STAT1 | 35333306 | 35333835 | 0,91 | ENSRNOG00000017084 | Hsd11b2     |
| P-STAT1 | 35531830 | 35532364 | 0,86 | ENSRNOG00000038973 | Acd         |
| P-STAT1 | 35531830 | 35532364 | 0,86 | ENSRNOG00000017746 | Pard6a      |
| P-STAT1 | 35536744 | 35537507 | 1,54 | ENSRNOG00000017867 | RGD1561415  |
| P-STAT1 | 35536744 | 35537507 | 1,54 | ENSRNOG00000038973 | Acd         |
| P-STAT1 | 35594161 | 35594508 | 1,04 | ENSRNOG00000017953 | Gfod2       |
| P-STAT1 | 35658864 | 35659438 | 0,86 | ENSRNOG00000018954 | Tsnaxip1    |
| P-STAT1 | 35687497 | 35687906 | 1    | ENSRNOG00000024178 | Cenpt       |
| P-STAT1 | 35687497 | 35687906 | 1    | ENSRNOG00000019109 | Thap11      |
| P-STAT1 | 35719431 | 35719875 | 1    | ENSRNOG00000024025 | Edc4        |
| P-STAT1 | 35776410 | 35776787 | 0,91 | ENSRNOG00000019353 | Ctrl        |
| P-STAT1 | 35805956 | 35806231 | 1,59 | ENSRNOG00000019651 | Slc12a4     |
| P-STAT1 | 35995345 | 35995679 | 0,91 | ENSRNOG00000019859 | Pla2g15     |
| P-STAT1 | 36029968 | 36030314 | 1,63 | ENSRNOG00000019943 | Slc7a6      |
| P-STAT1 | 36439846 | 36440188 | 1    | ENSRNOG00000020151 | Cdh1        |
| P-STAT1 | 36910888 | 36911222 | 1,04 | ENSRNOG00000020391 | Nip7        |
| P-STAT1 | 37299167 | 37300025 | 1,04 | ENSRNOG00000012937 | Wwp2        |
| P-STAT1 | 39831257 | 39831898 | 1    | ENSRNOG00000016291 | RGD1562056  |
| P-STAT1 | 40098120 | 40098484 | 1,59 | ENSRNOG00000017102 | Ftsjd1      |
| P-STAT1 | 40825114 | 40825948 | 1    | ENSRNOG00000017794 | Fuk         |
| P-STAT1 | 41672024 | 41672688 | 0,77 | ENSRNOG00000019253 | Bcar1       |
| P-STAT1 | 41878701 | 41879337 | 0,86 | ENSRNOG00000021517 | Tmem231     |
| P-STAT1 | 41878701 | 41879337 | 0,86 | ENSRNOG00000019425 | Gabarapl2   |
| P-STAT1 | 44489226 | 44489758 | 1,36 | ENSRNOG00000012238 | Clec3a      |
| P-STAT1 | 46464192 | 46464617 | 0,82 | ENSRNOG00000042888 | Cdyl2       |
| P-STAT1 | 47029834 | 47030260 | 1    | ENSRNOG00000011279 | 2310061C15F |
| P-STAT1 | 47260070 | 47260524 | 1,72 | ENSRNOG00000012671 | Gan         |
| P-STAT1 | 47802066 | 47802418 | 0,86 | ENSRNOG00000013982 | Hsd17b2     |
| P-STAT1 | 49635350 | 49635709 | 0,91 | ENSRNOG00000014522 | Mlycd       |
| P-STAT1 | 49637962 | 49638288 | 1,45 | ENSRNOG00000014522 | Mlycd       |
| P-STAT1 | 49805744 | 49806392 | 0,95 | ENSRNOG00000015173 | Mbtps1      |
| P-STAT1 | 49814084 | 49814409 | 0,86 | ENSRNOG00000015576 | Hsd1l       |
| P-STAT1 | 51097556 | 51097895 | 0,86 | ENSRNOG00000017869 | Irf8        |
| P-STAT1 | 52189743 | 52190443 | 1    | ENSRNOG00000019098 | Car5a       |
| P-STAT1 | 52189743 | 52190443 | 1    | ENSRNOG00000019140 | Banp        |
| P-STAT1 | 52860354 | 52860903 | 1,31 | ENSRNOG00000014405 | Aprt        |
| P-STAT1 | 52892715 | 52893069 | 1,31 | ENSRNOG00000014461 | Galns       |
| P-STAT1 | 52894415 | 52894687 | 0,86 | ENSRNOG00000014461 | Galns       |
| P-STAT1 | 52901953 | 52902911 | 0,91 | ENSRNOG00000029558 | EPAB2_RAT   |
| P-STAT1 | 53528887 | 53529339 | 0,91 | ENSRNOG00000016001 | Chmp1a      |
| P-STAT1 | 53528887 | 53529339 | 0,91 | ENSRNOG00000038239 | RGD1561507  |
| P-STAT1 | 53541996 | 53542330 | 1    | ENSRNOG00000016088 | Cdk10       |
| P-STAT1 | 53544151 | 53545052 | 1    | ENSRNOG00000016088 | Cdk10       |
| P-STAT1 | 53738675 | 53739144 | 1,04 | ENSRNOG00000038193 | B6ZGR5_RAT  |
| P-STAT1 | 53738675 | 53739144 | 1,04 | ENSRNOG00000017209 | Tubb3       |

|         |          |          |      |                    |            |
|---------|----------|----------|------|--------------------|------------|
| P-STAT1 | 53835608 | 53836441 | 1,09 | ENSRNOG00000026974 | Dbnidd1    |
| P-STAT1 | 53835608 | 53836441 | 1,09 | ENSRNOG00000026964 | Gas8       |
| P-STAT1 | 54609265 | 54609715 | 1,27 | ENSRNOG00000026791 | Pgbd5      |
| P-STAT1 | 54703821 | 54704264 | 1,04 | ENSRNOG00000018228 | LOC678914  |
| P-STAT1 | 54936652 | 54937101 | 0,95 | ENSRNOG00000019022 | Fam89a     |
| P-STAT1 | 55035668 | 55035997 | 2,13 | ENSRNOG00000019169 | RGD1562218 |
| P-STAT1 | 3063425  | 3064050  | 0,97 | ENSRNOG00000012810 | Rfesd      |
| P-STAT1 | 3183517  | 3183883  | 1,81 | ENSRNOG00000026937 | Arsk       |
| P-STAT1 | 4471929  | 4472271  | 1,3  | ENSRNOG00000040279 | Ankrd32    |
| P-STAT1 | 9750387  | 9750916  | 1,44 | ENSRNOG00000016298 | Lysmd3     |
| P-STAT1 | 14290577 | 14290923 | 1,07 | ENSRNOG00000029185 | Rasa1      |
| P-STAT1 | 19573103 | 19573507 | 0,97 | ENSRNOG00000032002 | Hapln1     |
| P-STAT1 | 19574208 | 19574647 | 2,14 | ENSRNOG00000032002 | Hapln1     |
| P-STAT1 | 20162138 | 20162692 | 2    | ENSRNOG00000029966 | Xrcc4      |
| P-STAT1 | 22361751 | 22362118 | 0,88 | ENSRNOG00000013818 | RGRF2_RAT  |
| P-STAT1 | 22364600 | 22364926 | 1,21 | ENSRNOG00000013818 | RGRF2_RAT  |
| P-STAT1 | 22604412 | 22604769 | 1,02 | ENSRNOG00000013521 | Dhfr       |
| P-STAT1 | 22810603 | 22810950 | 0,88 | ENSRNOG00000013050 | Spz1       |
| P-STAT1 | 22869157 | 22869621 | 1,02 | ENSRNOG00000024039 | Tpo1       |
| P-STAT1 | 23473293 | 23474230 | 0,97 | ENSRNOG00000012099 | Papd4      |
| P-STAT1 | 24588021 | 24588360 | 0,88 | ENSRNOG00000010774 | Scamp1     |
| P-STAT1 | 25689967 | 25690338 | 1,21 | ENSRNOG00000028941 | Zbed3      |
| P-STAT1 | 25691865 | 25692321 | 0,93 | ENSRNOG00000028941 | Zbed3      |
| P-STAT1 | 25814410 | 25814838 | 1,02 | ENSRNOG00000017890 | Crhbp      |
| P-STAT1 | 26845585 | 26846409 | 0,97 | ENSRNOG00000018193 | RGD1310597 |
| P-STAT1 | 27616412 | 27616765 | 1,25 | ENSRNOG00000016530 | Cdk105     |
| P-STAT1 | 28767425 | 28767798 | 0,88 | ENSRNOG00000016544 | Rgnef      |
| P-STAT1 | 28771418 | 28771862 | 1,02 | ENSRNOG00000016544 | Rgnef      |
| P-STAT1 | 28851749 | 28852394 | 0,97 | ENSRNOG00000016622 | Q6Q287_RAT |
| P-STAT1 | 29259611 | 29260245 | 0,88 | ENSRNOG00000015472 | Tmem174    |
| P-STAT1 | 30892183 | 30892646 | 1,02 | ENSRNOG00000017712 | Cartpt     |
| P-STAT1 | 31428445 | 31428674 | 1,02 | ENSRNOG00000018340 | Marveld2   |
| P-STAT1 | 35100106 | 35100561 | 0,93 | ENSRNOG00000012124 | RGD1306583 |
| P-STAT1 | 35100106 | 35100561 | 0,93 | ENSRNOG00000012354 | Trim23     |
| P-STAT1 | 39379255 | 39379728 | 0,88 | ENSRNOG00000009968 | Ercc8      |
| P-STAT1 | 42586401 | 42586741 | 1,02 | ENSRNOG00000043292 | Actbl2     |
| P-STAT1 | 44026947 | 44027205 | 1,49 | ENSRNOG00000026686 | DDX4_RAT   |
| P-STAT1 | 44309071 | 44309624 | 1,07 | ENSRNOG00000010125 | Q5BJW0_RAT |
| P-STAT1 | 44500674 | 44501128 | 0,93 | ENSRNOG00000010603 | Gzma       |
| P-STAT1 | 45044537 | 45044890 | 1,25 | ENSRNOG00000010971 | Snx18      |
| P-STAT1 | 49523130 | 49523582 | 1,11 | ENSRNOG00000011522 | Hcn1       |
| P-STAT1 | 51607446 | 51608092 | 0,97 | ENSRNOG00000017623 | B2RZ22_RAT |
| P-STAT1 | 51608350 | 51608890 | 1,49 | ENSRNOG00000017623 | B2RZ22_RAT |
| P-STAT1 | 51641427 | 51641909 | 1,11 | ENSRNOG00000017581 | RGD1306227 |
| P-STAT1 | 53397797 | 53398136 | 0,97 | ENSRNOG00000014550 | RGD1308448 |
| P-STAT1 | 53401600 | 53401939 | 1,11 | ENSRNOG00000014550 | RGD1308448 |
| P-STAT1 | 54096263 | 54096697 | 1,35 | ENSRNOG00000042327 | Heatr7b2   |
| P-STAT1 | 54302769 | 54303316 | 0,93 | ENSRNOG00000012538 | Rpl37      |
| P-STAT1 | 54302769 | 54303316 | 0,93 | ENSRNOG00000041093 | SNORD72    |

|         |           |           |      |                    |            |
|---------|-----------|-----------|------|--------------------|------------|
| P-STAT1 | 55856795  | 55857154  | 1,21 | ENSRNOG00000013886 | Fyb        |
| P-STAT1 | 55858506  | 55859055  | 1,07 | ENSRNOG00000013886 | Fyb        |
| P-STAT1 | 56121100  | 56121464  | 1,25 | ENSRNOG00000033192 | Osmr       |
| P-STAT1 | 58098852  | 58099206  | 0,93 | ENSRNOG00000025680 | Nipbl      |
| P-STAT1 | 58348062  | 58348406  | 1,16 | ENSRNOG00000016163 | Slc1a3     |
| P-STAT1 | 59127283  | 59127858  | 1,53 | ENSRNOG00000017413 | Il7r       |
| P-STAT1 | 59713092  | 59713447  | 1,07 | ENSRNOG00000017821 | Agxt2      |
| P-STAT1 | 60303569  | 60303959  | 0,88 | ENSRNOG00000018570 | C1qtnf3    |
| P-STAT1 | 61075511  | 61076057  | 1,02 | ENSRNOG00000030171 | LOC499541  |
| P-STAT1 | 61079493  | 61079822  | 1,25 | ENSRNOG00000030171 | LOC499541  |
| P-STAT1 | 61141901  | 61142240  | 0,93 | ENSRNOG00000032427 | LOC499542  |
| P-STAT1 | 61387402  | 61387846  | 1,16 | ENSRNOG00000030204 | LOC499544  |
| P-STAT1 | 61935235  | 61935809  | 0,88 | ENSRNOG00000013140 | Pdzd2      |
| P-STAT1 | 79285347  | 79285720  | 1,21 | ENSRNOG00000010960 | ANKH_RAT   |
| P-STAT1 | 79832189  | 79832653  | 0,97 | ENSRNOG00000012148 | Trio       |
| P-STAT1 | 87927618  | 87928457  | 0,84 | ENSRNOG00000031320 | LOC499565  |
| P-STAT1 | 88095020  | 88095459  | 1,44 | ENSRNOG00000009629 | Car2       |
| P-STAT1 | 89323249  | 89323810  | 0,93 | ENSRNOG00000011400 | RGD1305844 |
| P-STAT1 | 93271924  | 93272278  | 2,23 | ENSRNOG00000009953 | Snx16      |
| P-STAT1 | 93534318  | 93534657  | 1,11 | ENSRNOG00000010805 | Fabp4      |
| P-STAT1 | 95334307  | 95335548  | 0,74 | ENSRNOG00000011705 | Stmn2      |
| P-STAT1 | 104592547 | 104593201 | 1,07 | ENSRNOG00000012851 | Dnajc5b    |
| P-STAT1 | 113066515 | 113067311 | 0,84 | ENSRNOG00000013313 | Aadacl1    |
| P-STAT1 | 117169167 | 117170011 | 0,84 | ENSRNOG00000027935 | RGD1565052 |
| P-STAT1 | 118828396 | 118828945 | 1,62 | ENSRNOG00000011070 | Gnb4       |
| P-STAT1 | 119002590 | 119002961 | 0,97 | ENSRNOG00000030639 | Usp13      |
| P-STAT1 | 120156327 | 120156666 | 1,25 | ENSRNOG00000011440 | Ccdc39     |
| P-STAT1 | 120393479 | 120393938 | 0,88 | ENSRNOG00000012114 | Dnajc19    |
| P-STAT1 | 122662758 | 122663107 | 0,97 | ENSRNOG00000028350 | Arse       |
| P-STAT1 | 122980298 | 122980841 | 0,88 | ENSRNOG00000014453 | Anxa5      |
| P-STAT1 | 123049156 | 123049590 | 0,88 | ENSRNOG00000014674 | Exosc9     |
| P-STAT1 | 123051800 | 123052166 | 1,35 | ENSRNOG00000014674 | Exosc9     |
| P-STAT1 | 123659155 | 123659903 | 0,97 | ENSRNOG00000017348 | Il2        |
| P-STAT1 | 123960319 | 123960876 | 0,88 | ENSRNOG00000017462 | Spata5     |
| P-STAT1 | 127696419 | 127697054 | 0,97 | ENSRNOG00000010819 | Hspa4l     |
| P-STAT1 | 127697603 | 127698047 | 0,93 | ENSRNOG00000010819 | Hspa4l     |
| P-STAT1 | 128042930 | 128043376 | 1,11 | ENSRNOG00000014051 | Pgrmc2     |
| P-STAT1 | 128735508 | 128736135 | 0,88 | ENSRNOG00000014139 | Sc1t1      |
| P-STAT1 | 134159623 | 134160093 | 0,93 | ENSRNOG00000029749 | Pabpc4l    |
| P-STAT1 | 137169520 | 137170069 | 1,02 | ENSRNOG00000011239 | RGD1307595 |
| P-STAT1 | 137172710 | 137173066 | 1,02 | ENSRNOG00000011239 | RGD1307595 |
| P-STAT1 | 139318267 | 139318831 | 0,97 | ENSRNOG00000010210 | Slc7a11    |
| P-STAT1 | 140116029 | 140116303 | 1,9  | ENSRNOG00000010799 | Ccrn4l     |
| P-STAT1 | 140289625 | 140290063 | 1,02 | ENSRNOG00000011923 | Osap       |
| P-STAT1 | 143348228 | 143348722 | 0,93 | ENSRNOG00000011133 | Trpc4      |
| P-STAT1 | 143534166 | 143535005 | 0,93 | ENSRNOG00000012660 | Postn      |
| P-STAT1 | 144361414 | 144362551 | 0,97 | ENSRNOG00000038095 | LOC499618  |
| P-STAT1 | 144401967 | 144402416 | 0,97 | ENSRNOG00000038091 | Sohlh2     |
| P-STAT1 | 145003150 | 145003923 | 1,35 | ENSRNOG00000032941 | Mab21l1    |

|         |           |           |      |                    |             |
|---------|-----------|-----------|------|--------------------|-------------|
| P-STAT1 | 145004870 | 145005328 | 0,93 | ENSRNOG00000032941 | Mab21l1     |
| P-STAT1 | 148496837 | 148497190 | 0,93 | ENSRNOG00000025297 | Gpr171      |
| P-STAT1 | 148499525 | 148500053 | 1,3  | ENSRNOG00000025297 | Gpr171      |
| P-STAT1 | 148604858 | 148605411 | 0,97 | ENSRNOG00000029756 | P2ry13      |
| P-STAT1 | 148614369 | 148615233 | 0,74 | ENSRNOG00000013902 | P2ry12      |
| P-STAT1 | 152161724 | 152162005 | 0,88 | ENSRNOG00000014599 | Dhx36       |
| P-STAT1 | 153736815 | 153737264 | 1,67 | ENSRNOG00000021324 | RGD1565059  |
| P-STAT1 | 155770720 | 155771264 | 1,02 | ENSRNOG00000011586 | Ccnl1       |
| P-STAT1 | 156138796 | 156139655 | 1,72 | ENSRNOG00000012427 | Veph1       |
| P-STAT1 | 158707623 | 158708158 | 1,02 | ENSRNOG00000009468 | Il12a       |
| P-STAT1 | 158709381 | 158709841 | 1,11 | ENSRNOG00000009468 | Il12a       |
| P-STAT1 | 166004565 | 166005158 | 0,93 | ENSRNOG00000009792 | Zbbx        |
| P-STAT1 | 166442536 | 166442890 | 1,72 | ENSRNOG00000010248 | Serpini1    |
| P-STAT1 | 170588620 | 170589367 | 0,93 | ENSRNOG00000021581 | Rapgef2     |
| P-STAT1 | 170753469 | 170753915 | 1,3  | ENSRNOG00000032009 | LOC499643   |
| P-STAT1 | 171366197 | 171366771 | 0,97 | ENSRNOG00000010183 | MGC72614    |
| P-STAT1 | 172384215 | 172384780 | 0,93 | ENSRNOG00000028589 | Gria2       |
| P-STAT1 | 173738353 | 173738809 | 1,11 | ENSRNOG00000035916 | U6          |
| P-STAT1 | 173738353 | 173738809 | 1,11 | ENSRNOG00000012060 | Gucy1b3     |
| P-STAT1 | 174723157 | 174723521 | 1,39 | ENSRNOG00000025074 | Fgg         |
| P-STAT1 | 175614623 | 175615390 | 0,97 | ENSRNOG00000009822 | Tlr2        |
| P-STAT1 | 175615771 | 175616747 | 0,93 | ENSRNOG00000009822 | Tlr2        |
| P-STAT1 | 175975486 | 175975842 | 0,97 | ENSRNOG00000010124 | Trim2       |
| P-STAT1 | 176446017 | 176446663 | 1,35 | ENSRNOG00000010866 | Tmem154     |
| P-STAT1 | 176740544 | 176741081 | 1,07 | ENSRNOG00000033147 | Dear        |
| P-STAT1 | 178524505 | 178524962 | 0,97 | ENSRNOG00000031398 | Mab21l2     |
| P-STAT1 | 179590230 | 179590559 | 1,3  | ENSRNOG00000043511 | Etv3l       |
| P-STAT1 | 179809195 | 179809525 | 1,11 | ENSRNOG00000014937 | RGD1309453  |
| P-STAT1 | 179812071 | 179812415 | 1,11 | ENSRNOG00000014937 | RGD1309453  |
| P-STAT1 | 179994862 | 179995439 | 0,93 | ENSRNOG00000022234 | mrpl24      |
| P-STAT1 | 180376961 | 180377335 | 1,67 | ENSRNOG00000019090 | Cct3        |
| P-STAT1 | 180617207 | 180617651 | 0,97 | ENSRNOG00000019638 | Lmna        |
| P-STAT1 | 180845414 | 180845753 | 0,88 | ENSRNOG00000020232 | Rit1        |
| P-STAT1 | 181263705 | 181264069 | 0,97 | ENSRNOG00000020518 | Fam189b     |
| P-STAT1 | 181399039 | 181399817 | 1,35 | ENSRNOG00000036423 | rno-mir-92b |
| P-STAT1 | 181399039 | 181399817 | 1,35 | ENSRNOG00000020539 | B2GV31_RAT  |
| P-STAT1 | 181420776 | 181421106 | 1,3  | ENSRNOG00000027903 | Trim46      |
| P-STAT1 | 182457531 | 182457969 | 1,44 | ENSRNOG00000016961 | Rps27       |
| P-STAT1 | 182457531 | 182457969 | 1,44 | ENSRNOG00000016733 | Rab13       |
| P-STAT1 | 182807676 | 182808029 | 0,97 | ENSRNOG00000012053 | S100a16     |
| P-STAT1 | 182884631 | 182885544 | 0,93 | ENSRNOG00000011821 | S100a4      |
| P-STAT1 | 182946437 | 182947051 | 1,07 | ENSRNOG00000033352 | S100a7a     |
| P-STAT1 | 182989101 | 182989737 | 1,44 | ENSRNOG00000011483 | S100a9      |
| P-STAT1 | 185873469 | 185874334 | 1,07 | ENSRNOG00000042105 | Lce1l       |
| P-STAT1 | 186054884 | 186055452 | 1,07 | ENSRNOG00000009574 | Crcct1      |
| P-STAT1 | 186054884 | 186055452 | 1,07 | ENSRNOG00000009581 | Lce1m       |
| P-STAT1 | 186617381 | 186617947 | 0,88 | ENSRNOG00000010105 | S100a11     |
| P-STAT1 | 186620342 | 186620702 | 0,97 | ENSRNOG00000010105 | S100a11     |
| P-STAT1 | 189555188 | 189555640 | 1,35 | ENSRNOG00000020893 | SNX27_RAT   |

|         |           |           |      |                    |            |
|---------|-----------|-----------|------|--------------------|------------|
| P-STAT1 | 189557915 | 189558574 | 1,11 | ENSRNOG00000020893 | SNX27_RAT  |
| P-STAT1 | 189782492 | 189782826 | 2    | ENSRNOG00000020979 | Psmb4      |
| P-STAT1 | 189782492 | 189782826 | 2    | ENSRNOG00000044113 | snoU89     |
| P-STAT1 | 190026095 | 190026444 | 1,07 | ENSRNOG00000021088 | Tmod4      |
| P-STAT1 | 190070004 | 190070353 | 1,02 | ENSRNOG00000021101 | Sema6c     |
| P-STAT1 | 190195705 | 190196284 | 0,93 | ENSRNOG00000021120 | Prune      |
| P-STAT1 | 190195705 | 190196284 | 0,93 | ENSRNOG00000021131 | Fam63a     |
| P-STAT1 | 190531060 | 190531620 | 1,21 | ENSRNOG00000021166 | Ecm1       |
| P-STAT1 | 190551607 | 190552143 | 0,84 | ENSRNOG00000027726 | Tars2      |
| P-STAT1 | 190653758 | 190654317 | 0,97 | ENSRNOG00000024845 | B2RYT0_RAT |
| P-STAT1 | 190663049 | 190663692 | 1,86 | ENSRNOG00000042717 | RGD1566380 |
| P-STAT1 | 190903659 | 190904415 | 0,88 | ENSRNOG00000042068 | Otud7b     |
| P-STAT1 | 191078915 | 191079554 | 0,93 | ENSRNOG00000032224 | Hist2h4    |
| P-STAT1 | 191078915 | 191079554 | 0,93 | ENSRNOG00000028975 | Hist2h3c2  |
| P-STAT1 | 191078915 | 191079554 | 0,93 | ENSRNOG00000029696 | Hist2h2bb  |
| P-STAT1 | 191391251 | 191391856 | 1,07 | ENSRNOG00000033741 | Ankrd34a   |
| P-STAT1 | 192189008 | 192189537 | 1,02 | ENSRNOG00000017664 | Olr390     |
| P-STAT1 | 192498659 | 192499214 | 1,16 | ENSRNOG00000018166 | Prkab2     |
| P-STAT1 | 193065846 | 193067017 | 1,44 | ENSRNOG00000019046 | Reg4       |
| P-STAT1 | 193556961 | 193557731 | 1,53 | ENSRNOG00000019470 | Hao2       |
| P-STAT1 | 193560101 | 193560445 | 1,86 | ENSRNOG00000019470 | Hao2       |
| P-STAT1 | 194015044 | 194015494 | 0,84 | ENSRNOG00000019565 | Tbx15      |
| P-STAT1 | 195120602 | 195120831 | 2,14 | ENSRNOG00000019670 | Wdr3       |
| P-STAT1 | 195969994 | 195970468 | 0,97 | ENSRNOG00000015347 | Trim45     |
| P-STAT1 | 196926028 | 196926398 | 0,88 | ENSRNOG00000016044 | RGD1308694 |
| P-STAT1 | 196929882 | 196930428 | 0,97 | ENSRNOG00000016044 | RGD1308694 |
| P-STAT1 | 197099395 | 197099946 | 0,84 | ENSRNOG00000016237 | Nhlh2      |
| P-STAT1 | 197295076 | 197295615 | 1,02 | ENSRNOG00000016477 | Vangl1     |
| P-STAT1 | 198805666 | 198806010 | 0,97 | ENSRNOG00000019163 | Syt6       |
| P-STAT1 | 198960244 | 198960513 | 1,25 | ENSRNOG00000019211 | Olfml3     |
| P-STAT1 | 199052891 | 199053839 | 0,79 | ENSRNOG00000037149 | RGD1562344 |
| P-STAT1 | 200078640 | 200079778 | 0,79 | ENSRNOG00000012946 | Mov10      |
| P-STAT1 | 200954739 | 200955588 | 1,3  | ENSRNOG00000015691 | RGD1306526 |
| P-STAT1 | 201060161 | 201060790 | 0,88 | ENSRNOG00000032463 | Rap1a      |
| P-STAT1 | 201777878 | 201778343 | 0,88 | ENSRNOG00000037112 | Gm10673    |
| P-STAT1 | 201777878 | 201778343 | 0,88 | ENSRNOG00000017680 | Dennd2d    |
| P-STAT1 | 202470910 | 202471256 | 1,16 | ENSRNOG00000018116 | Kcna3      |
| P-STAT1 | 202557113 | 202557444 | 0,93 | ENSRNOG00000018285 | Kcna2      |
| P-STAT1 | 203153931 | 203154290 | 1,72 | ENSRNOG00000018290 | Alx3       |
| P-STAT1 | 203307520 | 203307865 | 0,88 | ENSRNOG00000018659 | Csf1       |
| P-STAT1 | 203435629 | 203436170 | 0,88 | ENSRNOG00000018699 | Eps8l3     |
| P-STAT1 | 203436648 | 203437099 | 2    | ENSRNOG00000018699 | Eps8l3     |
| P-STAT1 | 203507979 | 203508219 | 1,44 | ENSRNOG00000019017 | Gstm6      |
| P-STAT1 | 203648535 | 203648884 | 1,21 | ENSRNOG00000019240 | Ampd2      |
| P-STAT1 | 203648535 | 203648884 | 1,21 | ENSRNOG00000019296 | Gnat2      |
| P-STAT1 | 203934024 | 203934463 | 1,11 | ENSRNOG00000037082 | Mybphl     |
| P-STAT1 | 203950587 | 203951142 | 1,3  | ENSRNOG00000020013 | Psrc1      |
| P-STAT1 | 204096169 | 204097023 | 1,16 | ENSRNOG00000020307 | RGD1309139 |
| P-STAT1 | 205807307 | 205807656 | 2,14 | ENSRNOG00000043183 | LOC691470  |

|         |           |           |      |                    |            |
|---------|-----------|-----------|------|--------------------|------------|
| P-STAT1 | 209519187 | 209519743 | 0,93 | ENSRNOG00000030590 | Amy2       |
| P-STAT1 | 211854443 | 211855328 | 1,11 | ENSRNOG00000013683 | S1pr1      |
| P-STAT1 | 212299029 | 212299368 | 1,39 | ENSRNOG00000014333 | Vcam1      |
| P-STAT1 | 212654749 | 212655308 | 0,88 | ENSRNOG00000014515 | Cdc14a     |
| P-STAT1 | 212826312 | 212827262 | 0,84 | ENSRNOG00000015211 | Sass6      |
| P-STAT1 | 212826312 | 212827262 | 0,84 | ENSRNOG00000015140 | B2GV29_RAT |
| P-STAT1 | 213043801 | 213044553 | 0,88 | ENSRNOG00000016214 | Agl        |
| P-STAT1 | 218713155 | 218713629 | 0,97 | ENSRNOG00000012892 | Abca4      |
| P-STAT1 | 219289021 | 219289813 | 1,62 | ENSRNOG00000013798 | Fnbp1l     |
| P-STAT1 | 223048803 | 223049310 | 0,93 | ENSRNOG00000009345 | Ugt8       |
| P-STAT1 | 225185326 | 225185666 | 1,44 | ENSRNOG00000010875 | LOC691931  |
| P-STAT1 | 226578995 | 226579442 | 1,07 | ENSRNOG00000010681 | Pitx2      |
| P-STAT1 | 226581219 | 226581864 | 0,79 | ENSRNOG00000010681 | Pitx2      |
| P-STAT1 | 227266035 | 227266410 | 1,3  | ENSRNOG00000010159 | Rrh        |
| P-STAT1 | 227276109 | 227276444 | 1,49 | ENSRNOG00000009877 | Nola1      |
| P-STAT1 | 227327143 | 227327495 | 1,02 | ENSRNOG00000009864 | Pla2g12a   |
| P-STAT1 | 228130086 | 228130533 | 1,07 | ENSRNOG00000023322 | Ostc       |
| P-STAT1 | 228751946 | 228752491 | 1,02 | ENSRNOG00000010697 | Hadh       |
| P-STAT1 | 230093313 | 230093942 | 1,02 | ENSRNOG00000042721 | RGD1563706 |
| P-STAT1 | 230612464 | 230613011 | 0,93 | ENSRNOG00000011669 | Gstcd      |
| P-STAT1 | 230612464 | 230613011 | 0,93 | ENSRNOG00000011844 | Ints12     |
| P-STAT1 | 232305541 | 232306242 | 0,88 | ENSRNOG00000009372 | Tacr3      |
| P-STAT1 | 232306690 | 232307144 | 1,02 | ENSRNOG00000009372 | Tacr3      |
| P-STAT1 | 234889093 | 234889642 | 1,07 | ENSRNOG00000022910 | Emcn       |
| P-STAT1 | 235128198 | 235129233 | 0,93 | ENSRNOG00000010047 | Ddit4l     |
| P-STAT1 | 235748340 | 235748679 | 1,07 | ENSRNOG00000032959 | Adh7       |
| P-STAT1 | 235749030 | 235749676 | 0,84 | ENSRNOG00000032959 | Adh7       |
| P-STAT1 | 235798772 | 235799348 | 0,88 | ENSRNOG00000012464 | ADH1_RAT   |
| P-STAT1 | 240877918 | 240878372 | 0,93 | ENSRNOG00000011135 | Gtf2b      |
| P-STAT1 | 242903920 | 242904770 | 1,07 | ENSRNOG00000012957 | Sh3glb1    |
| P-STAT1 | 243085411 | 243085980 | 0,88 | ENSRNOG00000013447 | Clca3      |
| P-STAT1 | 243153111 | 243153460 | 1,9  | ENSRNOG00000014059 | Odf2l      |
| P-STAT1 | 244278243 | 244278877 | 0,93 | ENSRNOG00000014893 | Wdr63      |
| P-STAT1 | 244798434 | 244799275 | 1,39 | ENSRNOG00000016262 | Dnase2b    |
| P-STAT1 | 250683793 | 250684232 | 1,44 | ENSRNOG00000013011 | Dnajb4     |
| P-STAT1 | 250971829 | 250972378 | 1,3  | ENSRNOG00000042359 | Pigk       |
| P-STAT1 | 250976495 | 250977154 | 0,93 | ENSRNOG00000042359 | Pigk       |
| P-STAT1 | 251861314 | 251861743 | 0,97 | ENSRNOG00000035383 | SNORD45    |
| P-STAT1 | 251861314 | 251861743 | 0,97 | ENSRNOG00000009992 | Rabggtb    |
| P-STAT1 | 251861314 | 251861743 | 0,97 | ENSRNOG00000035779 | SNORD45    |
| P-STAT1 | 251861314 | 251861743 | 0,97 | ENSRNOG00000034364 | SNORD45    |
| P-STAT1 | 252123172 | 252123536 | 0,93 | ENSRNOG00000042332 | RGD1564620 |
| P-STAT1 | 252429300 | 252429744 | 0,88 | ENSRNOG00000028319 | Cryz       |
| P-STAT1 | 252434019 | 252434364 | 1,25 | ENSRNOG00000028328 | Tyw3       |
| P-STAT1 | 252434019 | 252434364 | 1,25 | ENSRNOG00000028319 | Cryz       |
| P-STAT1 | 252882545 | 252882909 | 1,11 | ENSRNOG00000009555 | Lrriq3     |
| P-STAT1 | 255644239 | 255644989 | 0,88 | ENSRNOG00000009990 | Zranb2     |
| P-STAT1 | 256176963 | 256177835 | 0,93 | ENSRNOG00000011555 | Lrrc40     |
| P-STAT1 | 256642963 | 256643526 | 0,93 | ENSRNOG00000011980 | Lrrc7      |

|         |           |           |      |                     |            |
|---------|-----------|-----------|------|---------------------|------------|
| P-STAT1 | 257845607 | 257846141 | 0,88 | ENSRNOG00000009582  | Rpe65      |
| P-STAT1 | 1242664   | 1243205   | 0,88 | ENSRNOG00000000759  | Olr1730    |
| P-STAT1 | 1362847   | 1363199   | 0,84 | ENSRNOG000000032802 | Olr1736    |
| P-STAT1 | 1445361   | 1445721   | 0,97 | ENSRNOG00000000765  | Olr1743    |
| P-STAT1 | 1488150   | 1488620   | 0,84 | ENSRNOG00000000769  | Olr1746    |
| P-STAT1 | 1583448   | 1584006   | 1,06 | ENSRNOG00000000774  | Gabbr1     |
| P-STAT1 | 1644544   | 1644783   | 1,02 | ENSRNOG000000033136 | RGD1560260 |
| P-STAT1 | 1644544   | 1644783   | 1,02 | ENSRNOG00000000724  | RT1-M4     |
| P-STAT1 | 1757799   | 1758347   | 0,84 | ENSRNOG000000021518 | Trim31     |
| P-STAT1 | 1768767   | 1769450   | 0,84 | ENSRNOG00000000783  | Trim40     |
| P-STAT1 | 1810215   | 1810682   | 1,06 | ENSRNOG000000032930 | Trim26     |
| P-STAT1 | 1981511   | 1981960   | 1,24 | ENSRNOG000000027873 | RT1-M1-4   |
| P-STAT1 | 2645053   | 2645607   | 1,15 | ENSRNOG000000042949 | LOC684097  |
| P-STAT1 | 2826421   | 2827067   | 1,19 | ENSRNOG000000042905 | RT1-T24-4  |
| P-STAT1 | 2937871   | 2938404   | 0,97 | ENSRNOG000000025806 | Prr3       |
| P-STAT1 | 3076571   | 3077227   | 1,37 | ENSRNOG00000000826  | Flot1      |
| P-STAT1 | 3076571   | 3077227   | 1,37 | ENSRNOG00000000827  | Ier3       |
| P-STAT1 | 3625205   | 3625633   | 0,88 | ENSRNOG000000034667 | SNORD83    |
| P-STAT1 | 3625205   | 3625633   | 0,88 | ENSRNOG00000000841  | Bat1       |
| P-STAT1 | 3625205   | 3625633   | 0,88 | ENSRNOG00000000839  | Nfkbil1    |
| P-STAT1 | 3626720   | 3627069   | 1,19 | ENSRNOG00000000839  | Nfkbil1    |
| P-STAT1 | 3626720   | 3627069   | 1,19 | ENSRNOG00000000841  | Bat1       |
| P-STAT1 | 3626720   | 3627069   | 1,19 | ENSRNOG000000034667 | SNORD83    |
| P-STAT1 | 3712588   | 3713232   | 0,97 | ENSRNOG00000000853  | Aif1       |
| P-STAT1 | 3755089   | 3755628   | 0,88 | ENSRNOG00000000851  | Bat3       |
| P-STAT1 | 3755089   | 3755628   | 0,88 | ENSRNOG00000000850  | Apom       |
| P-STAT1 | 3767472   | 3768111   | 1,1  | ENSRNOG000000027516 | Ly6g5b     |
| P-STAT1 | 3767472   | 3768111   | 1,1  | ENSRNOG00000000848  | Bat4       |
| P-STAT1 | 3770457   | 3770918   | 1,24 | ENSRNOG000000027516 | Ly6g5b     |
| P-STAT1 | 3799799   | 3800150   | 0,88 | ENSRNOG00000000845  | Bat5       |
| P-STAT1 | 3799799   | 3800150   | 0,88 | ENSRNOG000000027225 | Ly6g6f     |
| P-STAT1 | 3809853   | 3810244   | 1,32 | ENSRNOG000000027157 | Ly6g6e     |
| P-STAT1 | 3809853   | 3810244   | 1,32 | ENSRNOG00000000844  | Ly6g6d     |
| P-STAT1 | 3843428   | 3844017   | 1,94 | ENSRNOG000000029682 | Clic1      |
| P-STAT1 | 3843428   | 3844017   | 1,94 | ENSRNOG000000045317 | U6         |
| P-STAT1 | 3843428   | 3844017   | 1,94 | ENSRNOG00000000857  | Msh5       |
| P-STAT1 | 3954125   | 3954652   | 0,84 | ENSRNOG000000033526 | Hspa1a     |
| P-STAT1 | 4006723   | 4007072   | 1,06 | ENSRNOG000000032942 | Neu1       |
| P-STAT1 | 4020323   | 4020852   | 1,5  | ENSRNOG00000000878  | Slc44a4    |
| P-STAT1 | 4024943   | 4025323   | 1,15 | ENSRNOG00000000878  | Slc44a4    |
| P-STAT1 | 4200898   | 4201347   | 1,28 | ENSRNOG00000000431  | Atf6b      |
| P-STAT1 | 4202793   | 4203131   | 1,9  | ENSRNOG00000000432  | Fkbpl      |
| P-STAT1 | 4202793   | 4203131   | 1,9  | ENSRNOG00000000431  | Atf6b      |
| P-STAT1 | 4403592   | 4404131   | 0,97 | ENSRNOG000000029340 | Btnl8      |
| P-STAT1 | 4579561   | 4581203   | 0,88 | ENSRNOG000000039398 | Tesb       |
| P-STAT1 | 4786620   | 4787171   | 0,84 | ENSRNOG00000000455  | Tap2       |
| P-STAT1 | 4863675   | 4864049   | 1,15 | ENSRNOG00000000461  | Brd2       |
| P-STAT1 | 4910602   | 4911280   | 0,93 | ENSRNOG000000026669 | RT1-Ha     |
| P-STAT1 | 4957790   | 4958270   | 0,84 | ENSRNOG00000000465  | Slc39a7    |

|         |          |          |      |                    |            |
|---------|----------|----------|------|--------------------|------------|
| P-STAT1 | 4957790  | 4958270  | 0,84 | ENSRNOG00000000463 | Col11a2    |
| P-STAT1 | 5081688  | 5082444  | 0,93 | ENSRNOG00000028505 | Rps18      |
| P-STAT1 | 5081688  | 5082444  | 0,93 | ENSRNOG00000000470 | Vps52      |
| P-STAT1 | 5081688  | 5082444  | 0,93 | ENSRNOG00000044418 | U6         |
| P-STAT1 | 5098489  | 5098961  | 0,97 | ENSRNOG00000031171 | Wdr46      |
| P-STAT1 | 5098489  | 5098961  | 0,97 | ENSRNOG00000000473 | Pfdn6      |
| P-STAT1 | 6035821  | 6036187  | 1,46 | ENSRNOG00000038883 | Q2M1K7_RAT |
| P-STAT1 | 6593161  | 6593520  | 1,59 | ENSRNOG00000000506 | Tead3      |
| P-STAT1 | 6770721  | 6770978  | 1,24 | ENSRNOG00000000508 | RGD1306008 |
| P-STAT1 | 6785710  | 6786260  | 1,37 | ENSRNOG00000038807 | LOC689425  |
| P-STAT1 | 6790136  | 6790775  | 0,88 | ENSRNOG00000038807 | LOC689425  |
| P-STAT1 | 6871271  | 6871625  | 1,24 | ENSRNOG00000000511 | Srpk1      |
| P-STAT1 | 7925521  | 7926073  | 1,1  | ENSRNOG00000000532 | Ftsjd2     |
| P-STAT1 | 9221923  | 9222357  | 0,93 | ENSRNOG00000001152 | GLP1R_RAT  |
| P-STAT1 | 9530672  | 9531226  | 1,46 | ENSRNOG00000001164 | Tff1       |
| P-STAT1 | 9580526  | 9580965  | 1,06 | ENSRNOG00000001167 | Ubash3a    |
| P-STAT1 | 10017542 | 10017905 | 1,99 | ENSRNOG00000001184 | Pknx1      |
| P-STAT1 | 10295531 | 10295865 | 1,02 | ENSRNOG00000001189 | Snf1lk     |
| P-STAT1 | 10852410 | 10852669 | 0,84 | ENSRNOG00000001211 | RGD1303003 |
| P-STAT1 | 11043077 | 11043446 | 1,06 | ENSRNOG00000001215 | RGD1309594 |
| P-STAT1 | 11405165 | 11405789 | 1,15 | ENSRNOG00000038489 | Sumo3      |
| P-STAT1 | 11407415 | 11408486 | 0,97 | ENSRNOG00000038489 | Sumo3      |
| P-STAT1 | 11614960 | 11615289 | 2,43 | ENSRNOG00000001227 | RED1_RAT   |
| P-STAT1 | 11776040 | 11776584 | 0,93 | ENSRNOG00000001228 | Pofut2     |
| P-STAT1 | 12536941 | 12537284 | 1,06 | ENSRNOG00000001267 | Lss        |
| P-STAT1 | 12797844 | 12798208 | 1,02 | ENSRNOG00000001297 | Prmt2      |
| P-STAT1 | 12919196 | 12919520 | 0,93 | ENSRNOG00000006786 | Slc5a4a    |
| P-STAT1 | 13119925 | 13120400 | 1,02 | ENSRNOG00000028394 | Vpreb3     |
| P-STAT1 | 13119925 | 13120400 | 1,02 | ENSRNOG00000028386 | Gm867      |
| P-STAT1 | 13125389 | 13125848 | 0,93 | ENSRNOG00000028356 | Chchd10    |
| P-STAT1 | 13125389 | 13125848 | 0,93 | ENSRNOG00000028344 | Mmp11      |
| P-STAT1 | 13187705 | 13187973 | 1,15 | ENSRNOG00000006589 | Mif        |
| P-STAT1 | 13745213 | 13745570 | 1,28 | ENSRNOG00000038258 | Upb1       |
| P-STAT1 | 17483921 | 17484584 | 1,37 | ENSRNOG00000024086 | RGD1560350 |
| P-STAT1 | 18284904 | 18285462 | 1,28 | ENSRNOG00000000614 | Bicc1      |
| P-STAT1 | 20683590 | 20684361 | 0,79 | ENSRNOG00000027859 | Tmem26     |
| P-STAT1 | 22128818 | 22129265 | 1,19 | ENSRNOG00000000641 | Nrbf2      |
| P-STAT1 | 22310512 | 22311186 | 1,32 | ENSRNOG00000000645 | Reep3      |
| P-STAT1 | 25159253 | 25159820 | 1,02 | ENSRNOG00000000277 | Tet1       |
| P-STAT1 | 25410113 | 25410584 | 1,15 | ENSRNOG00000000386 | Pbid       |
| P-STAT1 | 25533248 | 25533718 | 1,15 | ENSRNOG00000000383 | Mypn       |
| P-STAT1 | 27592067 | 27592606 | 0,88 | ENSRNOG00000000571 | Psap       |
| P-STAT1 | 29012788 | 29013132 | 1,37 | ENSRNOG00000000558 | Ppa1       |
| P-STAT1 | 29765005 | 29765317 | 0,88 | ENSRNOG00000000394 | Srgn       |
| P-STAT1 | 31619822 | 31620244 | 0,84 | ENSRNOG00000000412 | Slc35f1    |
| P-STAT1 | 31998339 | 31998883 | 0,88 | ENSRNOG00000000413 | Pln        |
| P-STAT1 | 32257952 | 32258511 | 1,28 | ENSRNOG00000000415 | Asf1a      |
| P-STAT1 | 36655017 | 36655356 | 1,41 | ENSRNOG00000000811 | Pkib       |
| P-STAT1 | 36818772 | 36819111 | 1,06 | ENSRNOG00000000815 | Smpdl3a    |

|         |          |          |      |                     |            |
|---------|----------|----------|------|---------------------|------------|
| P-STAT1 | 38623118 | 38623377 | 1,28 | ENSRNOG00000000549  | Tspyl1     |
| P-STAT1 | 38639884 | 38640326 | 0,84 | ENSRNOG00000000547  | Tspyl4     |
| P-STAT1 | 38879817 | 38880385 | 1,46 | ENSRNOG00000000543  | Frk        |
| P-STAT1 | 43075728 | 43076075 | 1,41 | ENSRNOG00000042125  | Lama4      |
| P-STAT1 | 43275941 | 43276587 | 0,93 | ENSRNOG00000000598  | Tube1      |
| P-STAT1 | 44470459 | 44471147 | 0,84 | ENSRNOG00000000585  | Amd1       |
| P-STAT1 | 44766944 | 44767374 | 0,93 | ENSRNOG00000000582  | Ddo        |
| P-STAT1 | 44817126 | 44817463 | 0,93 | ENSRNOG00000024221  | LOC499465  |
| P-STAT1 | 44819303 | 44819640 | 1,41 | ENSRNOG00000024221  | LOC499465  |
| P-STAT1 | 45782658 | 45783092 | 0,93 | ENSRNOG00000000302  | Sesn1      |
| P-STAT1 | 46769011 | 46769566 | 1,46 | ENSRNOG00000000315  | LOC365595  |
| P-STAT1 | 46769011 | 46769566 | 1,46 | ENSRNOG00000026110  | Scml4      |
| P-STAT1 | 47822164 | 47822625 | 0,93 | ENSRNOG00000026049  | QRSL1_RAT  |
| P-STAT1 | 49023351 | 49023910 | 1,24 | ENSRNOG00000000325  | Prep       |
| P-STAT1 | 2607057  | 2607507  | 1,05 | ENSRNOG000000005871 | Il1rn      |
| P-STAT1 | 2620462  | 2621311  | 1,73 | ENSRNOG000000006079 | Psd4       |
| P-STAT1 | 3241480  | 3241827  | 0,91 | ENSRNOG000000007622 | Arrdc1     |
| P-STAT1 | 3257224  | 3257752  | 1,18 | ENSRNOG000000009286 | Noxa1      |
| P-STAT1 | 3340703  | 3341145  | 0,86 | ENSRNOG000000009354 | Nrarp      |
| P-STAT1 | 3358454  | 3358807  | 1,09 | ENSRNOG000000009369 | RGD1308019 |
| P-STAT1 | 3401187  | 3402036  | 0,82 | ENSRNOG000000010451 | Slc34a3    |
| P-STAT1 | 3401187  | 3402036  | 0,82 | ENSRNOG000000040284 | RGD1564535 |
| P-STAT1 | 3437612  | 3438541  | 0,96 | ENSRNOG000000011093 | B2RZ20_RAT |
| P-STAT1 | 3483175  | 3483514  | 1,27 | ENSRNOG000000011726 | Grin1      |
| P-STAT1 | 3567427  | 3567776  | 1,18 | ENSRNOG000000013895 | Npdc1      |
| P-STAT1 | 3593035  | 3593373  | 1,14 | ENSRNOG000000014268 | Abca2      |
| P-STAT1 | 3788754  | 3789093  | 0,96 | ENSRNOG000000017044 | LOC499754  |
| P-STAT1 | 3791889  | 3792558  | 1,77 | ENSRNOG000000017044 | LOC499754  |
| P-STAT1 | 3791889  | 3792558  | 1,77 | ENSRNOG000000028254 | Tmem141    |
| P-STAT1 | 3804314  | 3804658  | 0,91 | ENSRNOG000000017063 | Fcn1       |
| P-STAT1 | 3821318  | 3821682  | 1,09 | ENSRNOG000000017184 | Lcn5       |
| P-STAT1 | 3863961  | 3864470  | 0,86 | ENSRNOG000000042556 | Bmyc       |
| P-STAT1 | 3887977  | 3888816  | 1    | ENSRNOG000000033758 | Lcn11      |
| P-STAT1 | 4553264  | 4554043  | 0,82 | ENSRNOG000000018845 | Snapc4     |
| P-STAT1 | 4558996  | 4559530  | 1    | ENSRNOG000000026775 | Pmpca      |
| P-STAT1 | 4761397  | 4761646  | 1,05 | ENSRNOG000000019388 | EGFL7_RAT  |
| P-STAT1 | 4877734  | 4878174  | 1,14 | ENSRNOG000000033761 | Vegp1      |
| P-STAT1 | 5120632  | 5121184  | 0,86 | ENSRNOG000000029875 | Mrpl41     |
| P-STAT1 | 5120632  | 5121184  | 0,86 | ENSRNOG000000008190 | Pnpla7     |
| P-STAT1 | 5860278  | 5860722  | 0,96 | ENSRNOG000000027867 | Rexo4      |
| P-STAT1 | 5903612  | 5903971  | 0,86 | ENSRNOG000000005840 | RGD1311501 |
| P-STAT1 | 6349326  | 6349960  | 0,96 | ENSRNOG000000007422 | Vav2       |
| P-STAT1 | 6350346  | 6350725  | 1,23 | ENSRNOG000000007422 | Vav2       |
| P-STAT1 | 7845285  | 7846279  | 1    | ENSRNOG000000013040 | Ddx31      |
| P-STAT1 | 8225092  | 8225418  | 1,05 | ENSRNOG000000013694 | Ntng2      |
| P-STAT1 | 8814600  | 8814947  | 0,86 | ENSRNOG000000026636 | B6ID11_RAT |
| P-STAT1 | 8922036  | 8922708  | 0,91 | ENSRNOG000000015237 | Gle1       |
| P-STAT1 | 9181139  | 9181773  | 1    | ENSRNOG000000016033 | Endog      |
| P-STAT1 | 9193712  | 9194156  | 1,09 | ENSRNOG000000025711 | LOC499770  |

|         |          |          |      |                    |            |
|---------|----------|----------|------|--------------------|------------|
| P-STAT1 | 9861218  | 9861487  | 0,82 | ENSRNOG00000024809 | Mettl11a   |
| P-STAT1 | 10680517 | 10680768 | 0,86 | ENSRNOG00000009139 | Fubp3      |
| P-STAT1 | 11290856 | 11291212 | 1,09 | ENSRNOG00000010217 | Bat2l      |
| P-STAT1 | 11480636 | 11481434 | 1    | ENSRNOG00000033835 | Dnm1       |
| P-STAT1 | 11480636 | 11481434 | 1    | ENSRNOG00000034398 | U1         |
| P-STAT1 | 13408511 | 13409080 | 1    | ENSRNOG00000022162 | Pbx3       |
| P-STAT1 | 13882085 | 13882544 | 0,96 | ENSRNOG00000018809 | Psm5       |
| P-STAT1 | 13882085 | 13882544 | 0,96 | ENSRNOG00000018832 | RGD1564854 |
| P-STAT1 | 14448433 | 14448879 | 1,23 | ENSRNOG00000042373 | LOC652927  |
| P-STAT1 | 14475481 | 14476359 | 0,68 | ENSRNOG00000039210 | LOC502618  |
| P-STAT1 | 15159909 | 15160427 | 0,91 | ENSRNOG00000026111 | Morn5      |
| P-STAT1 | 15217215 | 15217557 | 1,09 | ENSRNOG00000005996 | Lhx6       |
| P-STAT1 | 15218670 | 15219337 | 1,27 | ENSRNOG00000005996 | Lhx6       |
| P-STAT1 | 15243602 | 15244247 | 0,86 | ENSRNOG00000025997 | Mrrf       |
| P-STAT1 | 15473155 | 15473634 | 1,23 | ENSRNOG00000032559 | Olr395     |
| P-STAT1 | 15790635 | 15791382 | 0,96 | ENSRNOG00000033780 | Olr400     |
| P-STAT1 | 16278556 | 16279117 | 0,91 | ENSRNOG00000032323 | Olr408     |
| P-STAT1 | 16353269 | 16353541 | 0,82 | ENSRNOG00000007911 | Olr411     |
| P-STAT1 | 16374057 | 16374396 | 0,91 | ENSRNOG00000034079 | Olr413     |
| P-STAT1 | 16380211 | 16381060 | 1,05 | ENSRNOG00000033799 | Olr414     |
| P-STAT1 | 16385345 | 16385685 | 1,05 | ENSRNOG00000030540 | Olr415     |
| P-STAT1 | 16417823 | 16418686 | 1,32 | ENSRNOG00000007954 | Olr417     |
| P-STAT1 | 16439065 | 16439494 | 0,96 | ENSRNOG00000029787 | Olr418     |
| P-STAT1 | 16440380 | 16440941 | 1,14 | ENSRNOG00000029787 | Olr418     |
| P-STAT1 | 16445154 | 16445416 | 1,32 | ENSRNOG00000007962 | Olr419     |
| P-STAT1 | 16446299 | 16447064 | 0,82 | ENSRNOG00000007962 | Olr419     |
| P-STAT1 | 16469334 | 16470125 | 0,91 | ENSRNOG00000035104 | U4         |
| P-STAT1 | 16469334 | 16470125 | 0,91 | ENSRNOG00000007965 | Olr420     |
| P-STAT1 | 16472035 | 16472472 | 1    | ENSRNOG00000007965 | Olr420     |
| P-STAT1 | 16523759 | 16524289 | 0,91 | ENSRNOG00000032102 | Olr422     |
| P-STAT1 | 16593931 | 16594268 | 1,32 | ENSRNOG00000007977 | Olr424     |
| P-STAT1 | 16739606 | 16740255 | 0,96 | ENSRNOG00000030460 | Olr428     |
| P-STAT1 | 16844186 | 16844629 | 0,91 | ENSRNOG00000008003 | Olr434     |
| P-STAT1 | 17116185 | 17116856 | 0,77 | ENSRNOG00000008484 | Pdcl       |
| P-STAT1 | 17116185 | 17116856 | 0,77 | ENSRNOG00000014043 | LOC502624  |
| P-STAT1 | 17267918 | 17268277 | 1,18 | ENSRNOG00000042269 | Gpr21      |
| P-STAT1 | 18451559 | 18452388 | 0,96 | ENSRNOG00000011732 | Psmb7      |
| P-STAT1 | 18795469 | 18795921 | 1,27 | ENSRNOG00000014272 | Rpl35      |
| P-STAT1 | 18795469 | 18795921 | 1,27 | ENSRNOG00000014317 | Arpc5l     |
| P-STAT1 | 24043489 | 24043950 | 0,96 | ENSRNOG00000029993 | Kynu       |
| P-STAT1 | 24256777 | 24257247 | 0,91 | ENSRNOG00000031168 | RHG15_RAT  |
| P-STAT1 | 30598431 | 30598891 | 0,96 | ENSRNOG00000004680 | Kif5c      |
| P-STAT1 | 30600686 | 30601029 | 2,14 | ENSRNOG00000004680 | Kif5c      |
| P-STAT1 | 32608458 | 32608912 | 1,41 | ENSRNOG00000027510 | TR134_RAT  |
| P-STAT1 | 34072825 | 34073259 | 1,05 | ENSRNOG00000007666 | Cacnb4     |
| P-STAT1 | 39764738 | 39765588 | 0,91 | ENSRNOG00000004645 | Galnt5     |
| P-STAT1 | 40103927 | 40104363 | 1,09 | ENSRNOG00000004828 | Acvr1c     |
| P-STAT1 | 40859467 | 40859812 | 1,64 | ENSRNOG00000025776 | Ccdc148    |
| P-STAT1 | 41360840 | 41361588 | 1,23 | ENSRNOG00000025394 | TANC1_RAT  |

|         |          |          |      |                     |            |
|---------|----------|----------|------|---------------------|------------|
| P-STAT1 | 41604290 | 41604734 | 0,86 | ENSRNOG00000005990  | Wdsub1     |
| P-STAT1 | 41922008 | 41922552 | 1,05 | ENSRNOG00000006241  | 07-mar     |
| P-STAT1 | 41923234 | 41923569 | 2,5  | ENSRNOG00000006241  | 07-mar     |
| P-STAT1 | 41992859 | 41993388 | 1    | ENSRNOG00000006623  | Cd302      |
| P-STAT1 | 44362590 | 44363055 | 1,23 | ENSRNOG000000030763 | Dpp4       |
| P-STAT1 | 44596088 | 44597116 | 1,05 | ENSRNOG00000006227  | Ifih1      |
| P-STAT1 | 50144386 | 50145060 | 0,82 | ENSRNOG00000007625  | B3galt1    |
| P-STAT1 | 51518189 | 51518542 | 1,36 | ENSRNOG00000006773  | Dhrs9      |
| P-STAT1 | 51938700 | 51939054 | 1,14 | ENSRNOG000000030535 | RGD1308818 |
| P-STAT1 | 51938700 | 51939054 | 1,14 | ENSRNOG00000007979  | Phospho2   |
| P-STAT1 | 52033069 | 52033618 | 0,96 | ENSRNOG00000008616  | RGD1565257 |
| P-STAT1 | 55714723 | 55715272 | 0,82 | ENSRNOG00000019047  | Ola1       |
| P-STAT1 | 55718241 | 55718627 | 1,41 | ENSRNOG00000019047  | Ola1       |
| P-STAT1 | 55821892 | 55822326 | 1,09 | ENSRNOG00000018719  | Cir1       |
| P-STAT1 | 57376515 | 57377058 | 1,32 | ENSRNOG00000001572  | Hoxd1      |
| P-STAT1 | 58649016 | 58649975 | 1,14 | ENSRNOG000000033636 | Ttc30a1    |
| P-STAT1 | 60372398 | 60372752 | 1,5  | ENSRNOG00000019065  | Zfp385b    |
| P-STAT1 | 60373051 | 60373382 | 1,14 | ENSRNOG00000019065  | Zfp385b    |
| P-STAT1 | 60375428 | 60375868 | 0,91 | ENSRNOG00000019065  | Zfp385b    |
| P-STAT1 | 61404410 | 61404754 | 1,59 | ENSRNOG000000038050 | RGD1564319 |
| P-STAT1 | 62021766 | 62022823 | 1,55 | ENSRNOG00000004861  | Itga4      |
| P-STAT1 | 66820159 | 66820813 | 0,96 | ENSRNOG00000005256  | Zc3h15     |
| P-STAT1 | 67647329 | 67647890 | 1,14 | ENSRNOG00000004622  | Calcr1     |
| P-STAT1 | 67699156 | 67699485 | 0,96 | ENSRNOG00000005039  | Tfpi       |
| P-STAT1 | 67700246 | 67700596 | 1,32 | ENSRNOG00000005039  | Tfpi       |
| P-STAT1 | 67700656 | 67701290 | 0,91 | ENSRNOG00000005039  | Tfpi       |
| P-STAT1 | 67977480 | 67978330 | 1,96 | ENSRNOG00000007457  | Serping1   |
| P-STAT1 | 68269114 | 68269642 | 1,18 | ENSRNOG00000008552  | P2RX3_RAT  |
| P-STAT1 | 68269114 | 68269642 | 1,18 | ENSRNOG00000008825  | Ssrp1      |
| P-STAT1 | 68273216 | 68273649 | 0,91 | ENSRNOG00000008552  | P2RX3_RAT  |
| P-STAT1 | 68273216 | 68273649 | 0,91 | ENSRNOG00000008825  | Ssrp1      |
| P-STAT1 | 68363568 | 68364215 | 1,27 | ENSRNOG00000009227  | Aplnr      |
| P-STAT1 | 68660333 | 68660782 | 1,09 | ENSRNOG000000033543 | Olr442     |
| P-STAT1 | 68841632 | 68841984 | 1,32 | ENSRNOG000000031509 | Olr445     |
| P-STAT1 | 68841632 | 68841984 | 1,32 | ENSRNOG000000028977 | Olr446     |
| P-STAT1 | 68957050 | 68957603 | 1,64 | ENSRNOG000000027449 | Olr454     |
| P-STAT1 | 68960450 | 68960789 | 0,86 | ENSRNOG000000027449 | Olr454     |
| P-STAT1 | 68980449 | 68980998 | 1,14 | ENSRNOG000000034209 | Olr456     |
| P-STAT1 | 69018423 | 69019263 | 1,14 | ENSRNOG000000029578 | Olr458     |
| P-STAT1 | 69038839 | 69039406 | 0,91 | ENSRNOG000000030662 | Olr459     |
| P-STAT1 | 69116526 | 69117460 | 0,77 | ENSRNOG000000009634 | Olr465     |
| P-STAT1 | 69133341 | 69133978 | 1,05 | ENSRNOG000000009644 | Olr466     |
| P-STAT1 | 69137360 | 69137714 | 2,18 | ENSRNOG000000009644 | Olr466     |
| P-STAT1 | 69161644 | 69162298 | 1    | ENSRNOG000000009659 | Olr468     |
| P-STAT1 | 69165735 | 69166206 | 1,14 | ENSRNOG000000009659 | Olr468     |
| P-STAT1 | 69165735 | 69166206 | 1,14 | ENSRNOG000000031426 | Olr469     |
| P-STAT1 | 69196800 | 69197449 | 1,32 | ENSRNOG000000031124 | Olr471     |
| P-STAT1 | 69242820 | 69243681 | 1,05 | ENSRNOG000000030468 | Olr475     |
| P-STAT1 | 69275178 | 69275812 | 0,86 | ENSRNOG000000031811 | Olr477     |

|         |          |          |      |                    |         |
|---------|----------|----------|------|--------------------|---------|
| P-STAT1 | 69381039 | 69381585 | 1,05 | ENSRNOG00000009744 | Olr484  |
| P-STAT1 | 69414863 | 69415313 | 0,91 | ENSRNOG00000029884 | Olr486  |
| P-STAT1 | 69820535 | 69820976 | 1,55 | ENSRNOG00000031502 | Olr514  |
| P-STAT1 | 70021559 | 70021931 | 0,86 | ENSRNOG00000033521 | Olr520  |
| P-STAT1 | 70352747 | 70353189 | 1,27 | ENSRNOG00000033816 | Olr531  |
| P-STAT1 | 70353543 | 70353877 | 1,64 | ENSRNOG00000033816 | Olr531  |
| P-STAT1 | 70377406 | 70378058 | 0,91 | ENSRNOG00000031268 | Olr532  |
| P-STAT1 | 70398243 | 70399006 | 0,96 | ENSRNOG00000043454 | Olr535  |
| P-STAT1 | 70404167 | 70404502 | 1,32 | ENSRNOG00000009943 | Olr536  |
| P-STAT1 | 70405573 | 70406113 | 0,82 | ENSRNOG00000009943 | Olr536  |
| P-STAT1 | 70576994 | 70577453 | 0,96 | ENSRNOG00000032113 | Olr542  |
| P-STAT1 | 70844956 | 70845310 | 0,96 | ENSRNOG00000032547 | Olr552  |
| P-STAT1 | 70874501 | 70875059 | 1,32 | ENSRNOG00000010035 | Olr554  |
| P-STAT1 | 71097051 | 71098009 | 1,18 | ENSRNOG00000037833 | Olr563  |
| P-STAT1 | 71585313 | 71585955 | 0,96 | ENSRNOG00000031772 | Olr590  |
| P-STAT1 | 71732986 | 71734045 | 0,96 | ENSRNOG00000005875 | Olr602  |
| P-STAT1 | 71766326 | 71766683 | 1,23 | ENSRNOG00000005880 | Olr604  |
| P-STAT1 | 71910142 | 71910495 | 0,86 | ENSRNOG00000005950 | Olr608  |
| P-STAT1 | 72084915 | 72085278 | 1,23 | ENSRNOG00000021473 | Olr619  |
| P-STAT1 | 72379686 | 72380125 | 0,96 | ENSRNOG00000030550 | Olr634  |
| P-STAT1 | 72498127 | 72498385 | 0,82 | ENSRNOG00000029616 | Olr639  |
| P-STAT1 | 72538888 | 72539355 | 0,91 | ENSRNOG00000030406 | Olr641  |
| P-STAT1 | 72689992 | 72690544 | 1    | ENSRNOG00000006080 | Olr649  |
| P-STAT1 | 72979411 | 72979965 | 0,91 | ENSRNOG00000006166 | Olr661  |
| P-STAT1 | 73017561 | 73017997 | 1,23 | ENSRNOG00000029775 | Olr663  |
| P-STAT1 | 73125871 | 73126530 | 0,86 | ENSRNOG00000028929 | Olr666  |
| P-STAT1 | 73900830 | 73901269 | 0,91 | ENSRNOG00000031282 | Olr704  |
| P-STAT1 | 73903745 | 73904996 | 0,82 | ENSRNOG00000031282 | Olr704  |
| P-STAT1 | 73939835 | 73940988 | 1,36 | ENSRNOG00000034169 | Olr705  |
| P-STAT1 | 74055990 | 74056855 | 0,91 | ENSRNOG00000028836 | Olr710  |
| P-STAT1 | 74105612 | 74106241 | 0,82 | ENSRNOG00000032338 | Olr713  |
| P-STAT1 | 74172402 | 74172746 | 1,23 | ENSRNOG00000032007 | Olr716  |
| P-STAT1 | 74214242 | 74214767 | 1,05 | ENSRNOG00000029507 | Olr718  |
| P-STAT1 | 74281275 | 74281820 | 0,86 | ENSRNOG00000006654 | Olr721  |
| P-STAT1 | 74349750 | 74350291 | 1,05 | ENSRNOG00000006706 | Olr724  |
| P-STAT1 | 74432486 | 74432835 | 1,23 | ENSRNOG00000030773 | Olr728  |
| P-STAT1 | 74499769 | 74500313 | 1,05 | ENSRNOG00000006819 | Olr731  |
| P-STAT1 | 74581280 | 74582309 | 1,05 | ENSRNOG00000033289 | Olr736  |
| P-STAT1 | 74616788 | 74617322 | 0,91 | ENSRNOG00000028308 | Olr737  |
| P-STAT1 | 74694936 | 74695295 | 1,41 | ENSRNOG00000029139 | Olr742  |
| P-STAT1 | 74725448 | 74725909 | 1,18 | ENSRNOG00000028267 | Olr744  |
| P-STAT1 | 74746781 | 74747130 | 1,77 | ENSRNOG00000032334 | Olr745  |
| P-STAT1 | 77583610 | 77584039 | 1    | ENSRNOG00000008738 | Tp53i11 |
| P-STAT1 | 77745591 | 77746476 | 0,86 | ENSRNOG00000008758 | Tspan18 |
| P-STAT1 | 78056257 | 78056600 | 1,23 | ENSRNOG00000000008 | Alx4    |
| P-STAT1 | 78815266 | 78815757 | 1    | ENSRNOG00000010495 | Ttc17   |
| P-STAT1 | 86794586 | 86794951 | 1,91 | ENSRNOG00000004630 | Rag1    |
| P-STAT1 | 86823697 | 86824546 | 1,23 | ENSRNOG00000004639 | Traf6   |
| P-STAT1 | 87866856 | 87867345 | 1,41 | ENSRNOG00000005479 | Slc1a2  |

|         |           |           |      |                      |             |
|---------|-----------|-----------|------|----------------------|-------------|
| P-STAT1 | 88269862  | 88271297  | 0,91 | ENSRNOG00000006947   | Pdhx        |
| P-STAT1 | 88854700  | 88855039  | 1,55 | ENSRNOG00000008510   | Abtb2       |
| P-STAT1 | 89353839  | 89354777  | 0,82 | ENSRNOG00000009401   | Lmo2        |
| P-STAT1 | 89482683  | 89483052  | 1,05 | ENSRNOG00000009549   | Fbxo3       |
| P-STAT1 | 90155931  | 90156280  | 1,05 | ENSRNOG000000037514  | Qser1       |
| P-STAT1 | 90526372  | 90526714  | 1,18 | ENSRNOG000000013074  | Wt1         |
| P-STAT1 | 91125694  | 91126138  | 1,18 | ENSRNOG000000004410  | Pax6        |
| P-STAT1 | 92473518  | 92474076  | 0,91 | ENSRNOG000000004891  | RGD1311463  |
| P-STAT1 | 92570403  | 92571544  | 0,91 | ENSRNOG000000004898  | Fshb        |
| P-STAT1 | 92780698  | 92781262  | 1,05 | ENSRNOG000000004918  | Kcna4       |
| P-STAT1 | 96071491  | 96071828  | 1    | ENSRNOG000000028008  | Slc5a12     |
| P-STAT1 | 96179453  | 96179794  | 0,96 | ENSRNOG000000004703  | Muc15       |
| P-STAT1 | 96182327  | 96182666  | 1,14 | ENSRNOG000000004703  | Muc15       |
| P-STAT1 | 96796623  | 96796976  | 0,91 | ENSRNOG000000030139  | Olr747      |
| P-STAT1 | 96796623  | 96796976  | 0,91 | ENSRNOG000000004809  | RGD1309783  |
| P-STAT1 | 96914686  | 96915551  | 0,86 | ENSRNOG000000031756  | Olr753      |
| P-STAT1 | 97428794  | 97429364  | 0,86 | ENSRNOG000000032681  | Olr775      |
| P-STAT1 | 97509489  | 97509938  | 0,96 | ENSRNOG000000032149  | Olr779      |
| P-STAT1 | 97513518  | 97514282  | 0,73 | ENSRNOG000000032149  | Olr779      |
| P-STAT1 | 97587010  | 97587891  | 1,14 | ENSRNOG000000034249  | Olr783      |
| P-STAT1 | 98222227  | 98222876  | 1    | ENSRNOG000000005814  | LOC691543   |
| P-STAT1 | 98223002  | 98224751  | 1,05 | ENSRNOG000000005814  | LOC691543   |
| P-STAT1 | 98304996  | 98305554  | 1,09 | ENSRNOG000000005884  | RGD1305045  |
| P-STAT1 | 98304996  | 98305554  | 1,09 | ENSRNOG0000000044923 | 7SK         |
| P-STAT1 | 98378473  | 98378827  | 0,86 | ENSRNOG000000006397  | Chrm5       |
| P-STAT1 | 105138868 | 105139526 | 1,23 | ENSRNOG000000007925  | Pak6        |
| P-STAT1 | 105222593 | 105223123 | 0,91 | ENSRNOG000000008229  | Plcb2       |
| P-STAT1 | 105282644 | 105283173 | 1,59 | ENSRNOG000000030336  | Phgr1       |
| P-STAT1 | 105282644 | 105283173 | 1,59 | ENSRNOG000000026787  | Disp2       |
| P-STAT1 | 105674398 | 105674969 | 1,32 | ENSRNOG000000011690  | Fam82a2     |
| P-STAT1 | 105682538 | 105682902 | 0,86 | ENSRNOG000000012290  | Gchfr       |
| P-STAT1 | 105799777 | 105800026 | 0,82 | ENSRNOG000000013380  | Rhov        |
| P-STAT1 | 106188297 | 106188659 | 0,96 | ENSRNOG000000005183  | Rtf1        |
| P-STAT1 | 106305440 | 106305671 | 0,91 | ENSRNOG000000005531  | Tyro3       |
| P-STAT1 | 106478214 | 106478585 | 0,86 | ENSRNOG000000007018  | Mapkbp1     |
| P-STAT1 | 106890039 | 106890393 | 1,18 | ENSRNOG000000024563  | Ganc        |
| P-STAT1 | 107625093 | 107626008 | 0,91 | ENSRNOG000000011059  | Ttbk2       |
| P-STAT1 | 108266609 | 108267165 | 1,23 | ENSRNOG000000015499  | Serinc4     |
| P-STAT1 | 108923658 | 108924280 | 1,46 | ENSRNOG000000017123  | B2m         |
| P-STAT1 | 108941998 | 108942447 | 1    | ENSRNOG000000017157  | Trim69      |
| P-STAT1 | 109012972 | 109013416 | 1,23 | ENSRNOG000000017291  | Sord        |
| P-STAT1 | 109580533 | 109580899 | 1,73 | ENSRNOG000000000169  | LOC691729   |
| P-STAT1 | 109608200 | 109608777 | 0,82 | ENSRNOG000000029643  | MGC105649   |
| P-STAT1 | 109608200 | 109608777 | 0,82 | ENSRNOG000000036445  | rno-mir-147 |
| P-STAT1 | 112366631 | 112367281 | 1,14 | ENSRNOG000000005158  | Slc24a5     |
| P-STAT1 | 112368239 | 112368691 | 1    | ENSRNOG000000005158  | Slc24a5     |
| P-STAT1 | 112453879 | 112454357 | 1,41 | ENSRNOG000000005367  | Slc12a1     |
| P-STAT1 | 112806245 | 112807374 | 0,77 | ENSRNOG000000007302  | Fbn1        |
| P-STAT1 | 113467937 | 113469178 | 0,73 | ENSRNOG000000009425  | Fgf7        |

|         |           |           |      |                    |            |
|---------|-----------|-----------|------|--------------------|------------|
| P-STAT1 | 114072258 | 114072793 | 1,14 | ENSRNOG00000010128 | S27A2_RAT  |
| P-STAT1 | 114768796 | 114769176 | 0,96 | ENSRNOG00000037095 | Gm10766    |
| P-STAT1 | 114768796 | 114769176 | 0,96 | ENSRNOG00000013479 | Stard7     |
| P-STAT1 | 115048524 | 115048972 | 1,23 | ENSRNOG00000014710 | Prom2      |
| P-STAT1 | 115121408 | 115121867 | 0,86 | ENSRNOG00000015188 | Zfp661     |
| P-STAT1 | 115121408 | 115121867 | 0,86 | ENSRNOG00000015192 | Mrps5      |
| P-STAT1 | 115189764 | 115190313 | 1,59 | ENSRNOG00000015445 | Mal        |
| P-STAT1 | 115253596 | 115254170 | 0,86 | ENSRNOG00000015599 | Mall       |
| P-STAT1 | 115323300 | 115323850 | 1,18 | ENSRNOG00000015756 | Nphp1      |
| P-STAT1 | 115323300 | 115323850 | 1,18 | ENSRNOG00000015847 | LOC680233  |
| P-STAT1 | 115357381 | 115357935 | 0,86 | ENSRNOG00000032778 | Bub1       |
| P-STAT1 | 116304319 | 116305183 | 1    | ENSRNOG00000017319 | Mertk      |
| P-STAT1 | 116809819 | 116810374 | 1    | ENSRNOG00000018567 | Slc20a1    |
| P-STAT1 | 117403145 | 117403674 | 1,05 | ENSRNOG00000006002 | Stk35      |
| P-STAT1 | 118180080 | 118180408 | 1,14 | ENSRNOG00000021224 | Mrps26     |
| P-STAT1 | 118207762 | 118208506 | 0,82 | ENSRNOG00000021229 | Avp        |
| P-STAT1 | 118324330 | 118324973 | 0,96 | ENSRNOG00000021234 | Slc4a11    |
| P-STAT1 | 118537785 | 118538281 | 0,86 | ENSRNOG00000021240 | Atrn       |
| P-STAT1 | 118789763 | 118790112 | 1,55 | ENSRNOG00000021243 | Siglec1    |
| P-STAT1 | 118866854 | 118867500 | 0,91 | ENSRNOG00000021245 | RGD1311739 |
| P-STAT1 | 118913399 | 118913828 | 0,96 | ENSRNOG00000021249 | RGD1561852 |
| P-STAT1 | 118969114 | 118969454 | 0,91 | ENSRNOG00000025286 | Pank2      |
| P-STAT1 | 120010013 | 120010555 | 1,27 | ENSRNOG00000021263 | RGD1307399 |
| P-STAT1 | 120351042 | 120351476 | 0,91 | ENSRNOG00000021267 | RGD735140  |
| P-STAT1 | 120617130 | 120617553 | 1,09 | ENSRNOG00000021270 | Trmt6      |
| P-STAT1 | 125219112 | 125220071 | 0,96 | ENSRNOG00000007443 | Jag1       |
| P-STAT1 | 126399693 | 126400147 | 0,96 | ENSRNOG00000008088 | Btdb3      |
| P-STAT1 | 128937288 | 128938123 | 1,23 | ENSRNOG00000004874 | Flrt3      |
| P-STAT1 | 131923845 | 131924209 | 1,05 | ENSRNOG00000005438 | Pcsk2      |
| P-STAT1 | 132796623 | 132796965 | 1,05 | ENSRNOG00000040669 | SNORD17    |
| P-STAT1 | 132796623 | 132796965 | 1,05 | ENSRNOG00000006077 | B1H267_RAT |
| P-STAT1 | 132796623 | 132796965 | 1,05 | ENSRNOG00000028196 | RGD1307465 |
| P-STAT1 | 132874078 | 132874712 | 0,86 | ENSRNOG00000006850 | Ovol2      |
| P-STAT1 | 133155720 | 133156075 | 1,05 | ENSRNOG00000036971 | RGD1566320 |
| P-STAT1 | 133155720 | 133156075 | 1,05 | ENSRNOG00000008746 | Dtd1       |
| P-STAT1 | 133156668 | 133156952 | 1,23 | ENSRNOG00000008746 | Dtd1       |
| P-STAT1 | 133159992 | 133160727 | 1    | ENSRNOG00000008746 | Dtd1       |
| P-STAT1 | 133369869 | 133370125 | 2,27 | ENSRNOG00000009461 | RGD1308385 |
| P-STAT1 | 134308332 | 134308576 | 1,77 | ENSRNOG00000010131 | Rin2       |
| P-STAT1 | 136004315 | 136004771 | 1,32 | ENSRNOG00000024882 | Pax1       |
| P-STAT1 | 137535366 | 137535828 | 1,14 | ENSRNOG00000004858 | LOC257643  |
| P-STAT1 | 137554768 | 137555117 | 1,73 | ENSRNOG00000004989 | Cst8       |
| P-STAT1 | 137557757 | 137558117 | 1,05 | ENSRNOG00000004989 | Cst8       |
| P-STAT1 | 137578086 | 137578436 | 1,09 | ENSRNOG00000005103 | Cst13      |
| P-STAT1 | 138963476 | 138963827 | 1,14 | ENSRNOG00000005545 | Cst10      |
| P-STAT1 | 139432110 | 139432559 | 1,14 | ENSRNOG00000031536 | RGD1310753 |
| P-STAT1 | 141222460 | 141222819 | 1,55 | ENSRNOG00000006795 | RGD1308874 |
| P-STAT1 | 141310028 | 141310377 | 1,64 | ENSRNOG00000007102 | Acss1      |
| P-STAT1 | 141330177 | 141330541 | 1,05 | ENSRNOG00000042220 | Vsx1       |

|         |           |           |      |                    |             |
|---------|-----------|-----------|------|--------------------|-------------|
| P-STAT1 | 142619932 | 142620294 | 1,14 | ENSRNOG00000005766 | Tbc1d20     |
| P-STAT1 | 142805122 | 142805473 | 0,96 | ENSRNOG00000023384 | Defb20      |
| P-STAT1 | 142841146 | 142841495 | 1,55 | ENSRNOG00000036901 | Defb26      |
| P-STAT1 | 142841146 | 142841495 | 1,55 | ENSRNOG00000036900 | Q32ZG4_RAT  |
| P-STAT1 | 142908427 | 142909314 | 1,46 | ENSRNOG00000023154 | Defb21      |
| P-STAT1 | 142910021 | 142910394 | 1,05 | ENSRNOG00000023154 | Defb21      |
| P-STAT1 | 142942215 | 142942666 | 1,41 | ENSRNOG00000036896 | Defb27      |
| P-STAT1 | 142942215 | 142942666 | 1,41 | ENSRNOG00000007558 | Defb36      |
| P-STAT1 | 143274231 | 143275056 | 1,59 | ENSRNOG00000008529 | Foxs1       |
| P-STAT1 | 143276846 | 143277315 | 1,18 | ENSRNOG00000008529 | Foxs1       |
| P-STAT1 | 143358377 | 143358717 | 1,23 | ENSRNOG00000008845 | Pdrg1       |
| P-STAT1 | 143589506 | 143590541 | 1,23 | ENSRNOG00000010104 | Pofut1      |
| P-STAT1 | 143595425 | 143595885 | 1,23 | ENSRNOG00000010086 | Plagl2      |
| P-STAT1 | 144014684 | 144015163 | 0,86 | ENSRNOG00000010538 | Commd7      |
| P-STAT1 | 144301552 | 144301901 | 0,86 | ENSRNOG00000013398 | LPLC3_RAT   |
| P-STAT1 | 144423189 | 144423538 | 1,64 | ENSRNOG00000036870 | Smgb        |
| P-STAT1 | 145019544 | 145020673 | 0,82 | ENSRNOG00000016583 | RGD1561517  |
| P-STAT1 | 145019544 | 145020673 | 0,82 | ENSRNOG00000036864 | 1700007I08R |
| P-STAT1 | 145033638 | 145033988 | 1,55 | ENSRNOG00000016380 | Necab3      |
| P-STAT1 | 145047023 | 145047482 | 1,14 | ENSRNOG00000016708 | E2f1        |
| P-STAT1 | 146205557 | 146205826 | 1,09 | ENSRNOG00000019152 | Trpc4ap     |
| P-STAT1 | 146240096 | 146240445 | 2,05 | ENSRNOG00000019299 | Edem2       |
| P-STAT1 | 146243763 | 146244103 | 0,86 | ENSRNOG00000019299 | Edem2       |
| P-STAT1 | 146464599 | 146465040 | 0,96 | ENSRNOG00000019467 | Fer1l4      |
| P-STAT1 | 146961204 | 146962349 | 0,86 | ENSRNOG00000020086 | B1WC03_RAT  |
| P-STAT1 | 147586044 | 147586573 | 1,23 | ENSRNOG00000006236 | Dsn1        |
| P-STAT1 | 148153100 | 148153997 | 1,05 | ENSRNOG00000009495 | Src         |
| P-STAT1 | 148720826 | 148721230 | 0,91 | ENSRNOG00000012880 | RGD1562582  |
| P-STAT1 | 148733564 | 148734265 | 1,09 | ENSRNOG00000012923 | Rprd1b      |
| P-STAT1 | 148735209 | 148735810 | 1,09 | ENSRNOG00000012923 | Rprd1b      |
| P-STAT1 | 148967087 | 148967535 | 0,86 | ENSRNOG00000034195 | Bpi         |
| P-STAT1 | 149338955 | 149339501 | 0,86 | ENSRNOG00000015393 | VIAAT_RAT   |
| P-STAT1 | 151520693 | 151521326 | 0,91 | ENSRNOG00000016340 | Plcg1       |
| P-STAT1 | 151574311 | 151574848 | 1,05 | ENSRNOG00000027988 | Zhx3        |
| P-STAT1 | 153791956 | 153792527 | 0,96 | ENSRNOG00000006380 | Sfrs6       |
| P-STAT1 | 154288209 | 154288938 | 1,23 | ENSRNOG00000008170 | Jph2        |
| P-STAT1 | 154341132 | 154341609 | 0,86 | ENSRNOG00000008790 | Gdap1l1     |
| P-STAT1 | 154383126 | 154383834 | 0,86 | ENSRNOG00000027434 | Fitm2       |
| P-STAT1 | 154514868 | 154515477 | 0,91 | ENSRNOG00000009060 | LOC502692   |
| P-STAT1 | 154514868 | 154515477 | 0,91 | ENSRNOG00000009076 | Ttpal       |
| P-STAT1 | 154661818 | 154662267 | 0,86 | ENSRNOG00000010265 | Ada         |
| P-STAT1 | 154772416 | 154772752 | 0,86 | ENSRNOG00000010816 | Kcnk15      |
| P-STAT1 | 155182982 | 155183646 | 0,96 | ENSRNOG00000013776 | Semg1       |
| P-STAT1 | 155261280 | 155262056 | 1,36 | ENSRNOG00000013834 | Svs5        |
| P-STAT1 | 155378853 | 155379389 | 1,18 | ENSRNOG00000030539 | Slpi        |
| P-STAT1 | 155509330 | 155509774 | 0,86 | ENSRNOG00000036780 | Gm10725     |
| P-STAT1 | 155509330 | 155509774 | 0,86 | ENSRNOG00000014571 | Dbndd2      |
| P-STAT1 | 155517771 | 155518128 | 1,5  | ENSRNOG00000014690 | Pigt        |
| P-STAT1 | 155615809 | 155616658 | 1,05 | ENSRNOG00000028908 | Spinlw1     |

|         |           |           |      |                    |            |
|---------|-----------|-----------|------|--------------------|------------|
| P-STAT1 | 155633090 | 155633833 | 1,23 | ENSRNOG00000031823 | Wfdc6b     |
| P-STAT1 | 155796289 | 155796741 | 1,27 | ENSRNOG00000015131 | Ube2c      |
| P-STAT1 | 155807269 | 155807708 | 0,91 | ENSRNOG00000015155 | Tnnc2      |
| P-STAT1 | 155863889 | 155864244 | 1,14 | ENSRNOG00000015744 | C20orf165  |
| P-STAT1 | 155863889 | 155864244 | 1,14 | ENSRNOG00000015857 | Ctsa       |
| P-STAT1 | 155982937 | 155983487 | 0,96 | ENSRNOG00000017539 | Mmp9       |
| P-STAT1 | 156368085 | 156368619 | 1,5  | ENSRNOG00000018747 | Elmo2      |
| P-STAT1 | 156559458 | 156559919 | 1,27 | ENSRNOG00000025384 | Slc2a10    |
| P-STAT1 | 156958409 | 156959019 | 1,09 | ENSRNOG00000019154 | Zmynd8     |
| P-STAT1 | 158146048 | 158146286 | 0,96 | ENSRNOG00000007781 | Stau1      |
| P-STAT1 | 158246824 | 158247288 | 0,86 | ENSRNOG00000008194 | RGD1306344 |
| P-STAT1 | 158248277 | 158248827 | 0,91 | ENSRNOG00000008194 | RGD1306344 |
| P-STAT1 | 158790571 | 158791011 | 1,09 | ENSRNOG00000025580 | Ube2v1     |
| P-STAT1 | 159356923 | 159357259 | 0,96 | ENSRNOG00000010975 | Adnp       |
| P-STAT1 | 163261278 | 163261522 | 0,82 | ENSRNOG00000004466 | RGD1311378 |
| P-STAT1 | 164554179 | 164554713 | 0,91 | ENSRNOG00000005762 | Rab22a     |
| P-STAT1 | 164992367 | 164992816 | 0,82 | ENSRNOG00000005281 | Stx16      |
| P-STAT1 | 165031715 | 165032054 | 1,27 | ENSRNOG00000028384 | Npepl1     |
| P-STAT1 | 165212277 | 165212821 | 0,86 | ENSRNOG00000025889 | GNAS3_RAT  |
| P-STAT1 | 167511491 | 167511935 | 1,09 | ENSRNOG00000024915 | Ppp1r3d    |
| P-STAT1 | 167511491 | 167511935 | 1,09 | ENSRNOG00000024702 | RGD1311952 |
| P-STAT1 | 169564639 | 169565083 | 0,86 | ENSRNOG00000028708 | Ntsr1      |
| P-STAT1 | 170031733 | 170032276 | 0,91 | ENSRNOG00000027015 | Ythdf1     |
| P-STAT1 | 170076137 | 170076389 | 0,82 | ENSRNOG00000043150 | Arfgap1    |
| P-STAT1 | 170304546 | 170304897 | 1,23 | ENSRNOG00000012477 | Eef1a2     |
| P-STAT1 | 170306954 | 170307288 | 1,86 | ENSRNOG00000012477 | Eef1a2     |
| P-STAT1 | 170325690 | 170326246 | 1,05 | ENSRNOG00000012722 | Pdpf       |
| P-STAT1 | 170326520 | 170326854 | 1,64 | ENSRNOG00000012722 | Pdpf       |
| P-STAT1 | 170502142 | 170503176 | 1,46 | ENSRNOG00000014235 | Lime1      |
| P-STAT1 | 170656151 | 170656510 | 1,09 | ENSRNOG00000015202 | Dnajc5     |
| P-STAT1 | 170735511 | 170735809 | 0,82 | ENSRNOG00000015558 | Znf512b    |
| P-STAT1 | 170735511 | 170735809 | 0,82 | ENSRNOG00000015600 | Prpf6      |
| P-STAT1 | 170825724 | 170826278 | 1,14 | ENSRNOG00000016248 | Sox18      |
| P-STAT1 | 2197942   | 2198276   | 0,88 | ENSRNOG00000006120 | Shh        |
| P-STAT1 | 2200242   | 2201080   | 0,83 | ENSRNOG00000006120 | Shh        |
| P-STAT1 | 5851256   | 5852261   | 0,92 | ENSRNOG00000009282 | Q5XIT4_RAT |
| P-STAT1 | 5924958   | 5925397   | 1,15 | ENSRNOG00000010077 | Smarcd3    |
| P-STAT1 | 6151967   | 6152356   | 1,15 | ENSRNOG00000008557 | Abcb8      |
| P-STAT1 | 6151967   | 6152356   | 1,15 | ENSRNOG00000023449 | Atg9b      |
| P-STAT1 | 6179784   | 6180321   | 0,88 | ENSRNOG00000009348 | Nos3       |
| P-STAT1 | 6181320   | 6181648   | 1,75 | ENSRNOG00000009348 | Nos3       |
| P-STAT1 | 8657332   | 8657965   | 0,88 | ENSRNOG00000011616 | Slc26a5    |
| P-STAT1 | 8760056   | 8760394   | 1,15 | ENSRNOG00000012693 | Pmpcb      |
| P-STAT1 | 8822462   | 8822817   | 0,97 | ENSRNOG00000011363 | Napepld    |
| P-STAT1 | 8865201   | 8865597   | 1,06 | ENSRNOG00000012785 | Armc10     |
| P-STAT1 | 8991361   | 8991910   | 1,11 | ENSRNOG00000012817 | Lrrc17     |
| P-STAT1 | 9185467   | 9185811   | 1,25 | ENSRNOG00000012881 | Fgl2       |
| P-STAT1 | 16782921  | 16783293  | 1,94 | ENSRNOG00000006631 | Sema3e     |
| P-STAT1 | 21386575  | 21386945  | 1,11 | ENSRNOG00000042758 | RGD1562351 |

|         |          |          |      |                    |            |
|---------|----------|----------|------|--------------------|------------|
| P-STAT1 | 21387891 | 21388444 | 1,2  | ENSRNOG00000042758 | RGD1562351 |
| P-STAT1 | 23267450 | 23268187 | 1,34 | ENSRNOG00000008594 | RGD1564345 |
| P-STAT1 | 25161146 | 25161495 | 0,88 | ENSRNOG00000007098 | Gtpbp10    |
| P-STAT1 | 26749628 | 26750090 | 0,88 | ENSRNOG00000007234 | CP51A_RAT  |
| P-STAT1 | 26937882 | 26938244 | 0,92 | ENSRNOG00000007899 | Mterf      |
| P-STAT1 | 27049226 | 27049863 | 1,62 | ENSRNOG00000007937 | Krit1      |
| P-STAT1 | 27049226 | 27049863 | 1,62 | ENSRNOG00000005502 | Ankib1     |
| P-STAT1 | 27213619 | 27213973 | 0,92 | ENSRNOG00000008585 | RGD1306626 |
| P-STAT1 | 29966890 | 29967749 | 1,57 | ENSRNOG00000008902 | Pon1       |
| P-STAT1 | 29968628 | 29969082 | 2,08 | ENSRNOG00000008902 | Pon1       |
| P-STAT1 | 30026881 | 30027515 | 0,83 | ENSRNOG00000009096 | Pon3       |
| P-STAT1 | 30248348 | 30248904 | 0,88 | ENSRNOG00000009565 | Pdk4       |
| P-STAT1 | 31783168 | 31783502 | 1,66 | ENSRNOG00000010905 | Dlx5       |
| P-STAT1 | 33308898 | 33309361 | 0,88 | ENSRNOG00000008309 | Rpa3       |
| P-STAT1 | 39300960 | 39301429 | 0,92 | ENSRNOG00000024636 | Gpr85      |
| P-STAT1 | 41240759 | 41241220 | 1,06 | ENSRNOG00000031036 | Mdfic      |
| P-STAT1 | 42930333 | 42931191 | 1,06 | ENSRNOG00000006411 | Cav2       |
| P-STAT1 | 43132503 | 43133053 | 1,02 | ENSRNOG00000007079 | Met        |
| P-STAT1 | 43775032 | 43775483 | 1,02 | ENSRNOG00000008004 | Asz1       |
| P-STAT1 | 47539430 | 47539889 | 0,92 | ENSRNOG00000029610 | Kcnd2      |
| P-STAT1 | 48166411 | 48167280 | 0,78 | ENSRNOG00000005272 | Tspan12    |
| P-STAT1 | 48607651 | 48608119 | 1,15 | ENSRNOG00000005781 | Wnt16      |
| P-STAT1 | 49645219 | 49645551 | 0,92 | ENSRNOG00000007608 | Fezf1      |
| P-STAT1 | 50537490 | 50537866 | 1,02 | ENSRNOG00000008121 | Slc13a1    |
| P-STAT1 | 50647020 | 50648171 | 0,78 | ENSRNOG00000013163 | RGD1562359 |
| P-STAT1 | 50948812 | 50949198 | 1,15 | ENSRNOG00000021729 | IQUB_RAT   |
| P-STAT1 | 51316247 | 51316694 | 0,88 | ENSRNOG00000039466 | Hyal5      |
| P-STAT1 | 55320272 | 55320613 | 1,43 | ENSRNOG00000008020 | Pax4       |
| P-STAT1 | 55348977 | 55349647 | 0,92 | ENSRNOG00000031173 | Snd1       |
| P-STAT1 | 57304720 | 57305183 | 0,97 | ENSRNOG00000010154 | Zc3hc1     |
| P-STAT1 | 57448945 | 57449414 | 2,12 | ENSRNOG00000028092 | Cpa2       |
| P-STAT1 | 57452130 | 57452683 | 1,06 | ENSRNOG00000028092 | Cpa2       |
| P-STAT1 | 57547603 | 57548048 | 1,57 | ENSRNOG00000010725 | Cpa1       |
| P-STAT1 | 57960697 | 57961043 | 0,92 | ENSRNOG00000011014 | RGD1566215 |
| P-STAT1 | 57980173 | 57980842 | 1,43 | ENSRNOG00000011108 | Tsga13     |
| P-STAT1 | 61501755 | 61502114 | 1,71 | ENSRNOG00000008851 | Slc35b4    |
| P-STAT1 | 61755762 | 61756348 | 1,2  | ENSRNOG00000027433 | Akr1b10    |
| P-STAT1 | 62087025 | 62087364 | 1,66 | ENSRNOG00000010233 | Cald1      |
| P-STAT1 | 64664286 | 64665055 | 1,02 | ENSRNOG00000026705 | Dgki       |
| P-STAT1 | 64973299 | 64973627 | 0,88 | ENSRNOG00000013004 | Akr1d1     |
| P-STAT1 | 66117720 | 66118237 | 1,02 | ENSRNOG00000045364 | U6         |
| P-STAT1 | 66930956 | 66931376 | 0,97 | ENSRNOG00000009280 | Q68FR1_RAT |
| P-STAT1 | 66930956 | 66931376 | 0,97 | ENSRNOG00000039033 | Gm10244    |
| P-STAT1 | 66930956 | 66931376 | 0,97 | ENSRNOG00000035673 | SNORA71    |
| P-STAT1 | 67875897 | 67876269 | 0,88 | ENSRNOG00000011509 | Agk        |
| P-STAT1 | 68041846 | 68042512 | 1,38 | ENSRNOG00000030413 | Tas2r137   |
| P-STAT1 | 68102207 | 68102590 | 1,2  | ENSRNOG00000012201 | RGD1311823 |
| P-STAT1 | 68103032 | 68103996 | 0,88 | ENSRNOG00000012201 | RGD1311823 |
| P-STAT1 | 68168555 | 68169009 | 0,88 | ENSRNOG00000012214 | Olr799     |

|         |           |           |      |                    |            |
|---------|-----------|-----------|------|--------------------|------------|
| P-STAT1 | 68677234  | 68677803  | 0,88 | ENSRNOG00000013382 | LOC286911  |
| P-STAT1 | 69055949  | 69056627  | 0,88 | ENSRNOG00000031682 | Try10      |
| P-STAT1 | 69059439  | 69059896  | 0,97 | ENSRNOG00000031682 | Try10      |
| P-STAT1 | 69087556  | 69087897  | 0,97 | ENSRNOG00000032916 | Prss2      |
| P-STAT1 | 69182800  | 69183261  | 1,57 | ENSRNOG00000032156 | Prss1      |
| P-STAT1 | 69313342  | 69313784  | 1,06 | ENSRNOG00000014367 | Ephb6      |
| P-STAT1 | 69861046  | 69861375  | 0,88 | ENSRNOG00000028135 | Tas2r39    |
| P-STAT1 | 69962797  | 69963547  | 0,97 | ENSRNOG00000028130 | Tas2r40    |
| P-STAT1 | 70030499  | 70030752  | 1,71 | ENSRNOG00000016707 | Casp2      |
| P-STAT1 | 70275971  | 70276445  | 0,88 | ENSRNOG00000029329 | Olr803     |
| P-STAT1 | 70337865  | 70338347  | 0,88 | ENSRNOG00000017906 | Olr804     |
| P-STAT1 | 70421729  | 70422183  | 1,06 | ENSRNOG00000038872 | Eapa2      |
| P-STAT1 | 70622293  | 70622642  | 1,34 | ENSRNOG00000018173 | Olr806     |
| P-STAT1 | 70795391  | 70795740  | 1,06 | ENSRNOG00000005407 | Olr812     |
| P-STAT1 | 70816256  | 70817296  | 1,02 | ENSRNOG00000005412 | Olr813     |
| P-STAT1 | 70904428  | 70904967  | 1,02 | ENSRNOG00000005444 | LOC502758  |
| P-STAT1 | 70952980  | 70953360  | 0,92 | ENSRNOG00000005469 | Olr819     |
| P-STAT1 | 70955192  | 70955546  | 1,15 | ENSRNOG00000005469 | Olr819     |
| P-STAT1 | 76527405  | 76527649  | 0,88 | ENSRNOG00000007707 | Znf467     |
| P-STAT1 | 76735558  | 76736122  | 1,15 | ENSRNOG00000020169 | Gimap8     |
| P-STAT1 | 77395241  | 77395721  | 1,11 | ENSRNOG00000009156 | Tra2a      |
| P-STAT1 | 77442456  | 77442832  | 1,11 | ENSRNOG00000009322 | Ccdc126    |
| P-STAT1 | 78035756  | 78036085  | 1,02 | ENSRNOG00000009768 | Npy        |
| P-STAT1 | 80463974  | 80465014  | 0,78 | ENSRNOG00000005968 | Hoxa2      |
| P-STAT1 | 82344320  | 82344673  | 0,97 | ENSRNOG00000009172 | Cpvl       |
| P-STAT1 | 82346160  | 82346530  | 1,25 | ENSRNOG00000009172 | Cpvl       |
| P-STAT1 | 82702006  | 82702654  | 0,92 | ENSRNOG00000009564 | RGD1311589 |
| P-STAT1 | 83467724  | 83468283  | 0,88 | ENSRNOG00000034084 | Ggct       |
| P-STAT1 | 83800256  | 83801026  | 0,97 | ENSRNOG00000028843 | Ggct       |
| P-STAT1 | 84206148  | 84206622  | 0,92 | ENSRNOG00000012098 | Adcyap1r1  |
| P-STAT1 | 86493601  | 86494260  | 0,88 | ENSRNOG00000030798 | V1rc16     |
| P-STAT1 | 86951500  | 86952036  | 0,88 | ENSRNOG00000030340 | V1rc42     |
| P-STAT1 | 87099025  | 87099424  | 1,48 | ENSRNOG00000031987 | V1rc28     |
| P-STAT1 | 87113635  | 87114041  | 1,06 | ENSRNOG00000006646 | Ecop       |
| P-STAT1 | 87114892  | 87115849  | 0,88 | ENSRNOG00000006646 | Ecop       |
| P-STAT1 | 87238061  | 87238411  | 0,88 | ENSRNOG00000006810 | Lancl2     |
| P-STAT1 | 87355235  | 87356595  | 0,97 | ENSRNOG00000038471 | LOC500148  |
| P-STAT1 | 87725738  | 87726309  | 1,25 | ENSRNOG00000007304 | Herc3      |
| P-STAT1 | 90252203  | 90252792  | 0,88 | ENSRNOG00000029321 | RGD1565731 |
| P-STAT1 | 94935065  | 94935647  | 0,88 | ENSRNOG00000006782 | RGD1560028 |
| P-STAT1 | 97804302  | 97804632  | 0,88 | ENSRNOG00000007740 | Tacstd2    |
| P-STAT1 | 103963849 | 103964188 | 1,38 | ENSRNOG00000005576 | Rpia       |
| P-STAT1 | 104103210 | 104103714 | 1,15 | ENSRNOG00000006476 | RGD1562720 |
| P-STAT1 | 104104405 | 104105140 | 0,83 | ENSRNOG00000006476 | RGD1562720 |
| P-STAT1 | 104411176 | 104411934 | 2,54 | ENSRNOG00000006675 | Fabp1      |
| P-STAT1 | 105190644 | 105191195 | 1,02 | ENSRNOG00000009484 | Ptcd3      |
| P-STAT1 | 105673625 | 105674369 | 1,11 | ENSRNOG00000012035 | Rnf181     |
| P-STAT1 | 105673625 | 105674369 | 1,11 | ENSRNOG00000012659 | Vamp5      |
| P-STAT1 | 105678512 | 105678867 | 0,88 | ENSRNOG00000012659 | Vamp5      |

|         |           |           |      |                    |            |
|---------|-----------|-----------|------|--------------------|------------|
| P-STAT1 | 106100614 | 106101215 | 0,92 | ENSRNOG00000038102 | Elmod3     |
| P-STAT1 | 106100614 | 106101215 | 0,92 | ENSRNOG00000014090 | Retsat     |
| P-STAT1 | 106119826 | 106120480 | 0,88 | ENSRNOG00000014617 | Tgoln1     |
| P-STAT1 | 106153182 | 106153539 | 0,92 | ENSRNOG00000014753 | Tcf7l1     |
| P-STAT1 | 112361924 | 112362582 | 1,11 | ENSRNOG00000006360 | Reg3a      |
| P-STAT1 | 112385936 | 112386566 | 0,97 | ENSRNOG00000006486 | Reg1a      |
| P-STAT1 | 117532583 | 117532953 | 1,62 | ENSRNOG00000010833 | Mthfd2     |
| P-STAT1 | 117560381 | 117561057 | 1,06 | ENSRNOG00000021866 | Bola3      |
| P-STAT1 | 117849217 | 117849576 | 1,34 | ENSRNOG00000013137 | Clec4f     |
| P-STAT1 | 117969462 | 117970034 | 0,97 | ENSRNOG00000013712 | Tex261     |
| P-STAT1 | 119368539 | 119368888 | 0,88 | ENSRNOG00000015455 | Spr        |
| P-STAT1 | 119706499 | 119707248 | 0,92 | ENSRNOG00000037857 | LOC686393  |
| P-STAT1 | 119706499 | 119707248 | 0,92 | ENSRNOG00000015630 | Cct7       |
| P-STAT1 | 121200516 | 121201951 | 1,43 | ENSRNOG00000018507 | Gfpt1      |
| P-STAT1 | 121505169 | 121505705 | 1,52 | ENSRNOG00000008838 | Gkn1       |
| P-STAT1 | 121699784 | 121700118 | 1,11 | ENSRNOG00000009347 | Arhgap25   |
| P-STAT1 | 121701516 | 121701883 | 1,15 | ENSRNOG00000009347 | Arhgap25   |
| P-STAT1 | 121962846 | 121963398 | 1,15 | ENSRNOG00000010015 | Gp9        |
| P-STAT1 | 122992525 | 122992985 | 1,29 | ENSRNOG00000016316 | Mcm2       |
| P-STAT1 | 123960757 | 123961200 | 0,97 | ENSRNOG00000017743 | V1ra7      |
| P-STAT1 | 124056678 | 124057027 | 0,88 | ENSRNOG00000026073 | V1ra8      |
| P-STAT1 | 124818700 | 124819145 | 1,06 | ENSRNOG00000031028 | V1ra14     |
| P-STAT1 | 125322208 | 125322661 | 0,92 | ENSRNOG00000006824 | Hdac11     |
| P-STAT1 | 125657057 | 125657506 | 0,92 | ENSRNOG00000022466 | Chchd4     |
| P-STAT1 | 125657057 | 125657506 | 0,92 | ENSRNOG00000007519 | Tmem43     |
| P-STAT1 | 125703244 | 125703596 | 0,92 | ENSRNOG00000008274 | Xpc        |
| P-STAT1 | 126074751 | 126075191 | 1,29 | ENSRNOG00000010090 | RGD1305225 |
| P-STAT1 | 126103801 | 126104837 | 0,88 | ENSRNOG00000022155 | RGD1560289 |
| P-STAT1 | 131782820 | 131783259 | 1,48 | ENSRNOG00000005830 | Fam19a4    |
| P-STAT1 | 131784910 | 131785259 | 1,75 | ENSRNOG00000005830 | Fam19a4    |
| P-STAT1 | 131786455 | 131787292 | 1,02 | ENSRNOG00000005830 | Fam19a4    |
| P-STAT1 | 131900288 | 131901239 | 1,11 | ENSRNOG00000005851 | Tmf1       |
| P-STAT1 | 135572748 | 135573079 | 1,06 | ENSRNOG00000005433 | Shq1       |
| P-STAT1 | 143702303 | 143702831 | 1,11 | ENSRNOG00000007104 | Itpr1      |
| P-STAT1 | 148070325 | 148070659 | 0,97 | ENSRNOG00000005690 | Lmcd1      |
| P-STAT1 | 149161696 | 149162050 | 0,88 | ENSRNOG00000023077 | Cpne9      |
| P-STAT1 | 149261979 | 149262313 | 1,02 | ENSRNOG00000008597 | TADA3_RAT  |
| P-STAT1 | 149505859 | 149506224 | 1,02 | ENSRNOG00000010184 | LOC679934  |
| P-STAT1 | 149598536 | 149599181 | 0,92 | ENSRNOG00000042482 | Tatdn2     |
| P-STAT1 | 149630839 | 149631594 | 1,02 | ENSRNOG00000010349 | Ghrl       |
| P-STAT1 | 149653444 | 149653803 | 1,11 | ENSRNOG00000010628 | Sec13      |
| P-STAT1 | 150065419 | 150065881 | 0,97 | ENSRNOG00000005697 | Slc6a11    |
| P-STAT1 | 150427180 | 150427509 | 1,75 | ENSRNOG00000007420 | Hrh1       |
| P-STAT1 | 150810441 | 150810897 | 0,97 | ENSRNOG00000007486 | Atg7       |
| P-STAT1 | 152756512 | 152757461 | 0,83 | ENSRNOG00000029464 | Olr825     |
| P-STAT1 | 153061295 | 153061641 | 1,02 | ENSRNOG00000023340 | Tmem72     |
| P-STAT1 | 153501342 | 153502180 | 0,78 | ENSRNOG00000013589 | Q80YV8_RAT |
| P-STAT1 | 154236904 | 154237658 | 1,02 | ENSRNOG00000014578 | Fxyd4      |
| P-STAT1 | 154239252 | 154240126 | 0,97 | ENSRNOG00000014578 | Fxyd4      |

|         |           |           |      |                    |            |
|---------|-----------|-----------|------|--------------------|------------|
| P-STAT1 | 156279791 | 156280331 | 1,15 | ENSRNOG00000009742 | Rad52      |
| P-STAT1 | 156475475 | 156475861 | 0,97 | ENSRNOG00000010282 | Ninj2      |
| P-STAT1 | 157182002 | 157182865 | 1,15 | ENSRNOG00000042731 | Slc25a18   |
| P-STAT1 | 157233354 | 157233714 | 0,92 | ENSRNOG00000012394 | Bcl2l13    |
| P-STAT1 | 158101658 | 158102957 | 1,11 | ENSRNOG00000028896 | A2m        |
| P-STAT1 | 158367651 | 158368129 | 0,92 | ENSRNOG00000005599 | Mug2       |
| P-STAT1 | 158762680 | 158763136 | 1,02 | ENSRNOG00000015191 | Phc1       |
| P-STAT1 | 159047059 | 159047608 | 1,02 | ENSRNOG00000015411 | Apobec1    |
| P-STAT1 | 159460351 | 159460881 | 1,06 | ENSRNOG00000010018 | Clec4a3    |
| P-STAT1 | 159906160 | 159906708 | 0,92 | ENSRNOG00000010203 | Clec4e     |
| P-STAT1 | 159958205 | 159958563 | 1,02 | ENSRNOG00000028538 | Vom2r48    |
| P-STAT1 | 160837272 | 160837611 | 1,11 | ENSRNOG00000012828 | Emg1       |
| P-STAT1 | 160837272 | 160837611 | 1,11 | ENSRNOG00000043569 | snoU89     |
| P-STAT1 | 160838554 | 160839400 | 0,92 | ENSRNOG00000043569 | snoU89     |
| P-STAT1 | 160838554 | 160839400 | 0,92 | ENSRNOG00000012828 | Emg1       |
| P-STAT1 | 160908496 | 160909051 | 0,83 | ENSRNOG00000026309 | Lrrc23     |
| P-STAT1 | 160939215 | 160939576 | 1,02 | ENSRNOG00000015290 | Tpi1       |
| P-STAT1 | 161118645 | 161118990 | 1,34 | ENSRNOG00000017052 | RGD1304952 |
| P-STAT1 | 161126312 | 161126942 | 0,88 | ENSRNOG00000017066 | Zfp384     |
| P-STAT1 | 161167948 | 161168692 | 1,02 | ENSRNOG00000017399 | ACRBP_RAT  |
| P-STAT1 | 161170858 | 161171202 | 1,38 | ENSRNOG00000017399 | ACRBP_RAT  |
| P-STAT1 | 161288518 | 161288881 | 1,38 | ENSRNOG00000018630 | LOC685186  |
| P-STAT1 | 161330025 | 161330660 | 1,02 | ENSRNOG00000019219 | Vamp1      |
| P-STAT1 | 161357297 | 161357646 | 1,02 | ENSRNOG00000027466 | Cd27       |
| P-STAT1 | 161405078 | 161405631 | 1,02 | ENSRNOG00000031707 | Tuba3a     |
| P-STAT1 | 163236919 | 163237357 | 0,88 | ENSRNOG00000026930 | Ndufa9     |
| P-STAT1 | 163236919 | 163237357 | 0,88 | ENSRNOG00000019783 | Akap3      |
| P-STAT1 | 163237798 | 163238147 | 1,02 | ENSRNOG00000026930 | Ndufa9     |
| P-STAT1 | 163237798 | 163238147 | 1,02 | ENSRNOG00000019783 | Akap3      |
| P-STAT1 | 163239090 | 163239626 | 1,02 | ENSRNOG00000019783 | Akap3      |
| P-STAT1 | 163239090 | 163239626 | 1,02 | ENSRNOG00000026930 | Ndufa9     |
| P-STAT1 | 163468140 | 163468474 | 1,02 | ENSRNOG00000019855 | Fgf23      |
| P-STAT1 | 165445935 | 165446545 | 0,92 | ENSRNOG00000006264 | Itfg2      |
| P-STAT1 | 165711158 | 165711931 | 1,15 | ENSRNOG00000007310 | Klrb1a     |
| P-STAT1 | 166665160 | 166665910 | 1,15 | ENSRNOG00000037070 | Clec12b    |
| P-STAT1 | 166802577 | 166803030 | 1,34 | ENSRNOG00000008498 | Gabarapl1  |
| P-STAT1 | 166867797 | 166868372 | 1,38 | ENSRNOG00000043234 | Klrd1      |
| P-STAT1 | 166922192 | 166922971 | 1,57 | ENSRNOG00000009638 | Klrk1      |
| P-STAT1 | 166945482 | 166946051 | 0,88 | ENSRNOG00000033712 | Klrc3      |
| P-STAT1 | 167462402 | 167463672 | 0,74 | ENSRNOG00000028915 | Ly49si1    |
| P-STAT1 | 168507834 | 168508290 | 0,88 | ENSRNOG00000031551 | Ly49i6     |
| P-STAT1 | 169646784 | 169647440 | 1,02 | ENSRNOG00000005379 | Q04154_RAT |
| P-STAT1 | 169787384 | 169787762 | 1,11 | ENSRNOG00000028983 | RGD1559532 |
| P-STAT1 | 169857676 | 169857959 | 1,15 | ENSRNOG00000005383 | Prp15      |
| P-STAT1 | 169959455 | 169960809 | 1,71 | ENSRNOG00000042018 | RGD1306750 |
| P-STAT1 | 170059516 | 170060588 | 1,15 | ENSRNOG00000021430 | Tas2r124   |
| P-STAT1 | 171745081 | 171745647 | 1,11 | ENSRNOG00000007115 | Crebl2     |
| P-STAT1 | 172041284 | 172041823 | 1,11 | ENSRNOG00000008439 | Gprc5d     |
| P-STAT1 | 172210516 | 172211052 | 0,92 | ENSRNOG00000008518 | Gsg1       |

|         |           |           |      |                     |            |
|---------|-----------|-----------|------|---------------------|------------|
| P-STAT1 | 173566689 | 173567123 | 1,38 | ENSRNOG00000008870  | Atf7ip     |
| P-STAT1 | 173839370 | 173839732 | 0,88 | ENSRNOG00000005505  | Wbp11      |
| P-STAT1 | 173839370 | 173839732 | 0,88 | ENSRNOG00000005629  | RGD1560652 |
| P-STAT1 | 173987197 | 173987526 | 1,02 | ENSRNOG00000005809  | Arhgdib    |
| P-STAT1 | 176711218 | 176711846 | 0,92 | ENSRNOG000000034228 | Pik3c2g    |
| P-STAT1 | 177160692 | 177161130 | 0,92 | ENSRNOG00000008514  | Plcz1      |
| P-STAT1 | 177160692 | 177161130 | 0,92 | ENSRNOG00000008727  | Capza3     |
| P-STAT1 | 179854293 | 179854737 | 0,92 | ENSRNOG00000012417  | Iapp       |
| P-STAT1 | 179953120 | 179953669 | 1,11 | ENSRNOG00000012602  | Recql      |
| P-STAT1 | 179954215 | 179954965 | 1,52 | ENSRNOG00000012602  | Recql      |
| P-STAT1 | 179974280 | 179974719 | 0,88 | ENSRNOG00000028602  | Q6TXE0_RAT |
| P-STAT1 | 180021360 | 180022233 | 1,2  | ENSRNOG00000012783  | Gys2       |
| P-STAT1 | 183288428 | 183288782 | 0,92 | ENSRNOG000000032967 | Tuba3b     |
| P-STAT1 | 184687993 | 184688521 | 1,02 | ENSRNOG000000036925 | LOC691362  |
| P-STAT1 | 184687993 | 184688521 | 1,02 | ENSRNOG00000001844  | Klhdc5     |
| P-STAT1 | 185828134 | 185828591 | 0,97 | ENSRNOG00000001852  | RGD1310606 |
| P-STAT1 | 185830520 | 185831357 | 0,88 | ENSRNOG00000001852  | RGD1310606 |
| P-STAT1 | 491620    | 491950    | 1,1  | ENSRNOG00000017686  | Pi15       |
| P-STAT1 | 4770368   | 4770727   | 0,87 | ENSRNOG00000007829  | Lactb2     |
| P-STAT1 | 5195648   | 5196097   | 1,14 | ENSRNOG00000007975  | Ncoa2      |
| P-STAT1 | 7047293   | 7048052   | 1,1  | ENSRNOG00000005375  | RGD1564053 |
| P-STAT1 | 8881258   | 8882717   | 0,73 | ENSRNOG000000021702 | LOC500392  |
| P-STAT1 | 8885007   | 8885466   | 0,96 | ENSRNOG000000021702 | LOC500392  |
| P-STAT1 | 9239989   | 9240455   | 1,19 | ENSRNOG000000021663 | RGD1561849 |
| P-STAT1 | 9302435   | 9302863   | 1,37 | ENSRNOG00000007069  | Adhfe1     |
| P-STAT1 | 13367444  | 13368008  | 0,96 | ENSRNOG00000006833  | Rb1cc1     |
| P-STAT1 | 14873159  | 14873710  | 1,1  | ENSRNOG000000022323 | Tcea1      |
| P-STAT1 | 17361311  | 17362272  | 1,74 | ENSRNOG00000008871  | Rdhe2      |
| P-STAT1 | 22051447  | 22051793  | 1,23 | ENSRNOG00000005669  | Car8       |
| P-STAT1 | 22385517  | 22385871  | 0,91 | ENSRNOG00000005963  | Rab2a      |
| P-STAT1 | 22546785  | 22547164  | 1,19 | ENSRNOG00000006689  | Chd7       |
| P-STAT1 | 25004907  | 25005455  | 1,14 | ENSRNOG00000007964  | Tp53inp1   |
| P-STAT1 | 25809965  | 25810421  | 0,96 | ENSRNOG00000015160  | Gem        |
| P-STAT1 | 26239752  | 26240305  | 1,55 | ENSRNOG00000016180  | Ppm2c      |
| P-STAT1 | 29286507  | 29286836  | 1,42 | ENSRNOG00000006636  | Otud6b     |
| P-STAT1 | 30455845  | 30456194  | 0,91 | ENSRNOG00000007456  | Calb1      |
| P-STAT1 | 30522378  | 30523328  | 1,51 | ENSRNOG00000008236  | Decr1      |
| P-STAT1 | 32348933  | 32349421  | 1,1  | ENSRNOG00000005708  | MMP16_RAT  |
| P-STAT1 | 34416337  | 34417086  | 0,87 | ENSRNOG000000024903 | Slc7a13    |
| P-STAT1 | 34639377  | 34639655  | 0,91 | ENSRNOG00000007139  | Ttpa       |
| P-STAT1 | 34667475  | 34668024  | 1,01 | ENSRNOG00000007351  | Ggh        |
| P-STAT1 | 36594318  | 36594675  | 1,1  | ENSRNOG00000008782  | Sfrs18     |
| P-STAT1 | 39937896  | 39938262  | 1,33 | ENSRNOG00000007506  | Ndufaf4    |
| P-STAT1 | 40934926  | 40935295  | 1,19 | ENSRNOG00000008475  | Fut9       |
| P-STAT1 | 41593086  | 41593830  | 0,82 | ENSRNOG00000008626  | Manea      |
| P-STAT1 | 48610032  | 48610576  | 0,87 | ENSRNOG00000006170  | Bach2      |
| P-STAT1 | 51868139  | 51868641  | 0,87 | ENSRNOG00000009478  | RGD1359108 |
| P-STAT1 | 56706203  | 56706653  | 1,01 | ENSRNOG000000031013 | RGD1306195 |
| P-STAT1 | 58084609  | 58084970  | 1,1  | ENSRNOG00000006582  | Aptx       |

|         |          |          |      |                     |              |
|---------|----------|----------|------|---------------------|--------------|
| P-STAT1 | 58777597 | 58778167 | 1,05 | ENSRNOG00000012004  | Ubap1        |
| P-STAT1 | 58884367 | 58884896 | 1,01 | ENSRNOG00000013110  | Nudt2        |
| P-STAT1 | 58987447 | 58988176 | 0,82 | ENSRNOG00000039559  | LOC691024    |
| P-STAT1 | 58987447 | 58988176 | 0,82 | ENSRNOG00000013734  | Dnai1        |
| P-STAT1 | 58990186 | 58990743 | 1,1  | ENSRNOG00000039559  | LOC691024    |
| P-STAT1 | 59204752 | 59205204 | 1,1  | ENSRNOG00000039530  | Ccl27        |
| P-STAT1 | 59352847 | 59353491 | 0,87 | ENSRNOG00000022751  | LOC500445    |
| P-STAT1 | 59434316 | 59434845 | 0,87 | ENSRNOG00000000130  | Dnajb5       |
| P-STAT1 | 59524794 | 59525331 | 0,96 | ENSRNOG00000009535  | Stoml2       |
| P-STAT1 | 59966571 | 59967120 | 1,1  | ENSRNOG00000021546  | Sit1         |
| P-STAT1 | 60178746 | 60179096 | 1,19 | ENSRNOG00000015652  | Olr833       |
| P-STAT1 | 60180404 | 60180653 | 0,91 | ENSRNOG00000015652  | Olr833       |
| P-STAT1 | 60301491 | 60302038 | 0,96 | ENSRNOG00000031259  | Olr839       |
| P-STAT1 | 60446003 | 60446352 | 1,42 | ENSRNOG00000014831  | Ccin         |
| P-STAT1 | 60481056 | 60481784 | 0,87 | ENSRNOG00000014635  | Clta         |
| P-STAT1 | 60631952 | 60632511 | 1,01 | ENSRNOG00000013956  | Rnf38        |
| P-STAT1 | 61534195 | 61534640 | 1,28 | ENSRNOG00000012794  | B0BN46_RAT   |
| P-STAT1 | 61744610 | 61744946 | 1,33 | ENSRNOG00000012546  | Frmppd1      |
| P-STAT1 | 61967401 | 61967736 | 0,96 | ENSRNOG00000039278  | Mcart1       |
| P-STAT1 | 61968904 | 61969237 | 1,01 | ENSRNOG00000039278  | Mcart1       |
| P-STAT1 | 62310811 | 62311155 | 1,37 | ENSRNOG00000011497  | Aldh1b1      |
| P-STAT1 | 62693561 | 62693913 | 1,23 | ENSRNOG00000009724  | Tstd2        |
| P-STAT1 | 62965936 | 62966377 | 1,65 | ENSRNOG00000009436  | Hemgn        |
| P-STAT1 | 63122073 | 63122402 | 1,14 | ENSRNOG00000008922  | Trim14       |
| P-STAT1 | 63615715 | 63616080 | 0,87 | ENSRNOG00000008431  | Gabbr2       |
| P-STAT1 | 64092812 | 64093154 | 0,91 | ENSRNOG00000006345  | Sec61b       |
| P-STAT1 | 64961787 | 64962141 | 1,01 | ENSRNOG00000005841  | Txndc4       |
| P-STAT1 | 64961787 | 64962141 | 1,01 | ENSRNOG00000008632  | Invs         |
| P-STAT1 | 65164982 | 65165445 | 1,65 | ENSRNOG00000008618  | Tex10        |
| P-STAT1 | 65168536 | 65169027 | 1,01 | ENSRNOG00000008618  | Tex10        |
| P-STAT1 | 65981579 | 65982023 | 0,87 | ENSRNOG00000007575  | Lppr1        |
| P-STAT1 | 66255736 | 66256074 | 1,01 | ENSRNOG00000007395  | Baat         |
| P-STAT1 | 66372289 | 66372585 | 1,65 | ENSRNOG00000006087  | Rnf20        |
| P-STAT1 | 70006685 | 70007047 | 1,65 | ENSRNOG00000005666  | Olr841       |
| P-STAT1 | 70007995 | 70008629 | 1,14 | ENSRNOG00000005666  | Olr841       |
| P-STAT1 | 70398946 | 70399386 | 0,91 | ENSRNOG00000018357  | Olr853       |
| P-STAT1 | 70399931 | 70400285 | 0,91 | ENSRNOG00000018357  | Olr853       |
| P-STAT1 | 73254686 | 73255164 | 1,19 | ENSRNOG00000016137  | Rad23b       |
| P-STAT1 | 73450928 | 73451478 | 0,96 | ENSRNOG00000016299  | Klf4<i><sup> |
| P-STAT1 | 74645848 | 74646287 | 0,91 | ENSRNOG00000016641  | Actl7a       |
| P-STAT1 | 74647948 | 74648475 | 0,87 | ENSRNOG00000016641  | Actl7a       |
| P-STAT1 | 74647948 | 74648475 | 0,87 | ENSRNOG00000016621  | Actl7b       |
| P-STAT1 | 74650429 | 74650898 | 0,91 | ENSRNOG00000016641  | Actl7a       |
| P-STAT1 | 74650429 | 74650898 | 0,91 | ENSRNOG00000016621  | Actl7b       |
| P-STAT1 | 74706366 | 74706737 | 1,23 | ENSRNOG00000016725  | Ikbkap       |
| P-STAT1 | 74706366 | 74706737 | 1,23 | ENSRNOG00000010532  | LOC298018    |
| P-STAT1 | 74775419 | 74775663 | 1,01 | ENSRNOG00000010593  | Ctnnal1      |
| P-STAT1 | 75061223 | 75062174 | 1,19 | ENSRNOG00000030163  | RGD1562988   |
| P-STAT1 | 76986128 | 76986488 | 1,28 | ENSRNOG000000041764 | 5S_rRNA      |

|         |           |           |      |                     |            |
|---------|-----------|-----------|------|---------------------|------------|
| P-STAT1 | 77485805  | 77486142  | 2,06 | ENSRNOG00000029752  | Susd1      |
| P-STAT1 | 77922307  | 77922983  | 1,1  | ENSRNOG00000017132  | Snx30      |
| P-STAT1 | 79404497  | 79405026  | 1,05 | ENSRNOG00000029785  | Cdc26      |
| P-STAT1 | 79404497  | 79405026  | 1,05 | ENSRNOG00000014777  | Prpf4      |
| P-STAT1 | 79406645  | 79406979  | 1,19 | ENSRNOG00000029785  | Cdc26      |
| P-STAT1 | 79464984  | 79465433  | 1,19 | ENSRNOG00000014869  | Wdr31      |
| P-STAT1 | 79467103  | 79467442  | 0,87 | ENSRNOG00000015105  | Bspry      |
| P-STAT1 | 79501325  | 79501971  | 0,91 | ENSRNOG00000015195  | Hdhd3      |
| P-STAT1 | 79517408  | 79517872  | 1,1  | ENSRNOG00000015206  | Alad       |
| P-STAT1 | 79517408  | 79517872  | 1,1  | ENSRNOG00000024506  | LOC500475  |
| P-STAT1 | 80467122  | 80467565  | 1,01 | ENSRNOG00000001700  | Cip98      |
| P-STAT1 | 80513050  | 80513906  | 1,05 | ENSRNOG00000008163  | Atp6v1g1   |
| P-STAT1 | 80528027  | 80528356  | 0,91 | ENSRNOG00000008712  | RGD1304595 |
| P-STAT1 | 101732830 | 101733276 | 1,33 | ENSRNOG00000010484  | Zdhhc21    |
| P-STAT1 | 102165952 | 102166933 | 0,87 | ENSRNOG000000042603 | Ttc39b     |
| P-STAT1 | 102275811 | 102276279 | 1,19 | ENSRNOG00000010825  | Snapc3     |
| P-STAT1 | 102338740 | 102339204 | 1,14 | ENSRNOG00000011498  | Psip1      |
| P-STAT1 | 102376779 | 102377324 | 2,06 | ENSRNOG000000042123 | RGD1560884 |
| P-STAT1 | 109874768 | 109875217 | 0,87 | ENSRNOG000000033600 | Zfp352     |
| P-STAT1 | 111308149 | 111309184 | 1,23 | ENSRNOG000000006853 | Elavl2     |
| P-STAT1 | 116729752 | 116730119 | 1,05 | ENSRNOG000000031004 | Cyp2j4     |
| P-STAT1 | 116931008 | 116931466 | 0,96 | ENSRNOG000000026169 | RGD1560146 |
| P-STAT1 | 116935320 | 116935950 | 0,91 | ENSRNOG000000026169 | RGD1560146 |
| P-STAT1 | 118161263 | 118161820 | 1,37 | ENSRNOG000000006966 | Nfia       |
| P-STAT1 | 118162285 | 118162643 | 1,6  | ENSRNOG000000006966 | Nfia       |
| P-STAT1 | 120402956 | 120403311 | 1,19 | ENSRNOG000000009045 | Alg6       |
| P-STAT1 | 120526404 | 120526733 | 0,87 | ENSRNOG000000009116 | Itgb3bp    |
| P-STAT1 | 120526404 | 120526733 | 0,87 | ENSRNOG000000009782 | Efcab7     |
| P-STAT1 | 120592536 | 120592990 | 1,74 | ENSRNOG000000009889 | Pgm1       |
| P-STAT1 | 120593921 | 120594404 | 1,05 | ENSRNOG000000009889 | Pgm1       |
| P-STAT1 | 120594946 | 120595515 | 1,05 | ENSRNOG000000009889 | Pgm1       |
| P-STAT1 | 122154061 | 122154530 | 0,87 | ENSRNOG00000011968  | Dnajc6     |
| P-STAT1 | 123911030 | 123912184 | 0,82 | ENSRNOG000000023100 | Tctex1d1   |
| P-STAT1 | 123912845 | 123913380 | 1,14 | ENSRNOG000000023100 | Tctex1d1   |
| P-STAT1 | 125431159 | 125431603 | 1,1  | ENSRNOG000000007410 | Dab1       |
| P-STAT1 | 125830413 | 125830861 | 1,23 | ENSRNOG000000007697 | C8a        |
| P-STAT1 | 125831128 | 125831656 | 1,23 | ENSRNOG000000007697 | C8a        |
| P-STAT1 | 126072963 | 126073500 | 0,96 | ENSRNOG000000007706 | Prkaa2     |
| P-STAT1 | 127523434 | 127523904 | 0,91 | ENSRNOG000000006280 | Pcsk9      |
| P-STAT1 | 127553718 | 127554069 | 0,96 | ENSRNOG000000006543 | Bsnd       |
| P-STAT1 | 127694832 | 127695279 | 0,91 | ENSRNOG000000030914 | RGD1559493 |
| P-STAT1 | 127694832 | 127695279 | 0,91 | ENSRNOG000000007189 | Ttc22      |
| P-STAT1 | 128266402 | 128266956 | 1,1  | ENSRNOG000000009778 | RGD1310313 |
| P-STAT1 | 128267017 | 128267464 | 1,51 | ENSRNOG000000009778 | RGD1310313 |
| P-STAT1 | 128268347 | 128268577 | 1,1  | ENSRNOG000000009778 | RGD1310313 |
| P-STAT1 | 128404793 | 128405022 | 0,96 | ENSRNOG000000025019 | Dio1       |
| P-STAT1 | 128987291 | 128987620 | 0,96 | ENSRNOG00000012724  | CA123_RAT  |
| P-STAT1 | 128992230 | 128992482 | 0,87 | ENSRNOG00000012724  | CA123_RAT  |
| P-STAT1 | 129071326 | 129071855 | 1,01 | ENSRNOG000000043561 | SNORA2     |

|         |           |           |      |                    |            |
|---------|-----------|-----------|------|--------------------|------------|
| P-STAT1 | 129071326 | 129071855 | 1,01 | ENSRNOG00000011644 | Slc1a7     |
| P-STAT1 | 129073036 | 129073631 | 1,1  | ENSRNOG00000011644 | Slc1a7     |
| P-STAT1 | 130084764 | 130085364 | 0,91 | ENSRNOG00000027183 | Zfyve9     |
| P-STAT1 | 133467818 | 133468353 | 1,01 | ENSRNOG00000042950 | Slc5a9     |
| P-STAT1 | 133468908 | 133469492 | 1,65 | ENSRNOG00000042950 | Slc5a9     |
| P-STAT1 | 133515667 | 133516109 | 0,96 | ENSRNOG00000043194 | Skint1     |
| P-STAT1 | 135527677 | 135528136 | 0,96 | ENSRNOG00000043513 | Cyp4x1     |
| P-STAT1 | 135579499 | 135580058 | 1,37 | ENSRNOG00000008842 | Cyp4a8     |
| P-STAT1 | 135894283 | 135894659 | 1,42 | ENSRNOG00000030154 | Cyp4a2     |
| P-STAT1 | 135897280 | 135897857 | 1,23 | ENSRNOG00000009597 | Cyp4a1     |
| P-STAT1 | 135897280 | 135897857 | 1,23 | ENSRNOG00000030154 | Cyp4a2     |
| P-STAT1 | 135901509 | 135902463 | 1,42 | ENSRNOG00000009597 | Cyp4a1     |
| P-STAT1 | 136048464 | 136049003 | 1,01 | ENSRNOG00000010162 | LOC690079  |
| P-STAT1 | 136048464 | 136049003 | 1,01 | ENSRNOG00000010169 | Atpaf1     |
| P-STAT1 | 136257073 | 136257632 | 0,87 | ENSRNOG00000013642 | Lrrc41     |
| P-STAT1 | 136276418 | 136276777 | 0,96 | ENSRNOG00000012020 | Nsun4      |
| P-STAT1 | 136791722 | 136792727 | 0,91 | ENSRNOG00000016183 | Ipp        |
| P-STAT1 | 137001904 | 137002771 | 1,28 | ENSRNOG00000017233 | Mmachc     |
| P-STAT1 | 137001904 | 137002771 | 1,28 | ENSRNOG00000022953 | Ccdc163    |
| P-STAT1 | 137101395 | 137101749 | 1,14 | ENSRNOG00000017887 | Mutyh      |
| P-STAT1 | 137471900 | 137472238 | 0,91 | ENSRNOG00000034454 | SNORD38    |
| P-STAT1 | 137471900 | 137472238 | 0,91 | ENSRNOG00000034574 | SNORD38    |
| P-STAT1 | 137471900 | 137472238 | 0,91 | ENSRNOG00000035374 | SNORD46    |
| P-STAT1 | 137471900 | 137472238 | 0,91 | ENSRNOG00000018768 | Rps8       |
| P-STAT1 | 138346531 | 138347069 | 0,87 | ENSRNOG00000019609 | B4galt2    |
| P-STAT1 | 138349327 | 138350076 | 1,01 | ENSRNOG00000019609 | B4galt2    |
| P-STAT1 | 138652467 | 138652755 | 1,1  | ENSRNOG00000019956 | Kdm4a      |
| P-STAT1 | 138919749 | 138920073 | 1,1  | ENSRNOG00000034373 | U6         |
| P-STAT1 | 138919749 | 138920073 | 1,1  | ENSRNOG00000028415 | Cdc20      |
| P-STAT1 | 138966945 | 138967516 | 0,96 | ENSRNOG00000020173 | Tie1       |
| P-STAT1 | 138993446 | 138994007 | 1,01 | ENSRNOG00000020259 | RGD1305347 |
| P-STAT1 | 139167174 | 139167518 | 0,91 | ENSRNOG00000007161 | Olr857     |
| P-STAT1 | 139185539 | 139186168 | 1,92 | ENSRNOG00000007171 | Olr858     |
| P-STAT1 | 139409678 | 139410232 | 0,87 | ENSRNOG00000032927 | Olr867     |
| P-STAT1 | 139438914 | 139439546 | 1,05 | ENSRNOG00000030373 | Olr868     |
| P-STAT1 | 139804440 | 139805137 | 0,82 | ENSRNOG00000006658 | RGD1563015 |
| P-STAT1 | 139814055 | 139814712 | 0,87 | ENSRNOG00000007538 | Lepre1     |
| P-STAT1 | 139834588 | 139835057 | 1,01 | ENSRNOG00000007922 | Cldn19     |
| P-STAT1 | 139877086 | 139877551 | 1,1  | ENSRNOG00000023786 | Q3ZAV2_RAT |
| P-STAT1 | 140647464 | 140648013 | 1,23 | ENSRNOG00000009341 | Hivep3     |
| P-STAT1 | 140649526 | 140650085 | 1,14 | ENSRNOG00000009341 | Hivep3     |
| P-STAT1 | 140739544 | 140740572 | 1,1  | ENSRNOG00000009390 | Edn2       |
| P-STAT1 | 141445985 | 141446344 | 0,96 | ENSRNOG00000011171 | Rims3      |
| P-STAT1 | 141447699 | 141448048 | 1,42 | ENSRNOG00000011171 | Rims3      |
| P-STAT1 | 141448574 | 141448927 | 1,33 | ENSRNOG00000011171 | Rims3      |
| P-STAT1 | 141678545 | 141679126 | 1,37 | ENSRNOG00000012054 | Zmpste24   |
| P-STAT1 | 142276887 | 142277326 | 0,91 | ENSRNOG00000014008 | Mfsd2      |
| P-STAT1 | 142459010 | 142459579 | 1,23 | ENSRNOG00000014762 | Ppie       |
| P-STAT1 | 143022503 | 143022975 | 0,91 | ENSRNOG00000026646 | Ndufs5     |

|         |           |           |      |                    |            |
|---------|-----------|-----------|------|--------------------|------------|
| P-STAT1 | 143049444 | 143049973 | 1,51 | ENSRNOG00000026610 | Akirin1    |
| P-STAT1 | 145566306 | 145567200 | 0,91 | ENSRNOG00000009977 | Thrap3     |
| P-STAT1 | 146637741 | 146638077 | 1,01 | ENSRNOG00000014302 | Dlgap3     |
| P-STAT1 | 146801433 | 146802087 | 1,23 | ENSRNOG00000026910 | Gjb4       |
| P-STAT1 | 147930795 | 147931227 | 1,05 | ENSRNOG00000006004 | Phc2       |
| P-STAT1 | 147978343 | 147978897 | 0,87 | ENSRNOG00000005935 | A3galt2    |
| P-STAT1 | 148540263 | 148540802 | 0,82 | ENSRNOG00000008300 | Zbtb8a     |
| P-STAT1 | 148540263 | 148540802 | 0,82 | ENSRNOG00000044674 | SNORA70    |
| P-STAT1 | 148900664 | 148901025 | 1,01 | ENSRNOG00000009918 | KHDR1_RAT  |
| P-STAT1 | 149303582 | 149304373 | 1,01 | ENSRNOG00000012989 | Serinc2    |
| P-STAT1 | 149387220 | 149387588 | 1,14 | ENSRNOG00000012266 | Zcchc17    |
| P-STAT1 | 149387220 | 149387588 | 1,14 | ENSRNOG00000012219 | RGD1309198 |
| P-STAT1 | 151846236 | 151847023 | 0,82 | ENSRNOG00000008564 | Tmem222    |
| P-STAT1 | 151913266 | 151914210 | 0,73 | ENSRNOG00000009505 | Cd164l2    |
| P-STAT1 | 151913266 | 151914210 | 0,73 | ENSRNOG00000009540 | Gpr3       |
| P-STAT1 | 152507168 | 152507741 | 1,23 | ENSRNOG00000010396 | Eya3       |
| P-STAT1 | 152511817 | 152512073 | 1,14 | ENSRNOG00000010396 | Eya3       |
| P-STAT1 | 152931188 | 152931547 | 1,05 | ENSRNOG00000016249 | Ccdc21     |
| P-STAT1 | 153118908 | 153119277 | 0,91 | ENSRNOG00000016776 | Extl1      |
| P-STAT1 | 153153358 | 153154012 | 1,01 | ENSRNOG00000022288 | Pafah2     |
| P-STAT1 | 153225192 | 153225516 | 1,14 | ENSRNOG00000016810 | Stmn1      |
| P-STAT1 | 153692034 | 153692463 | 0,87 | ENSRNOG00000017279 | Tmem50a    |
| P-STAT1 | 154219211 | 154219565 | 1,97 | ENSRNOG00000018576 | Rcan3      |
| P-STAT1 | 154633161 | 154633961 | 0,91 | ENSRNOG00000007992 | Q4KM38_RAT |
| P-STAT1 | 154701697 | 154702361 | 1,65 | ENSRNOG00000009325 | Fuca1      |
| P-STAT1 | 154931803 | 154932434 | 1,14 | ENSRNOG00000026124 | Id3        |
| P-STAT1 | 155188656 | 155189211 | 0,82 | ENSRNOG00000012038 | Htr1d      |
| P-STAT1 | 155607611 | 155607959 | 0,91 | ENSRNOG00000012531 | Ephb2      |
| P-STAT1 | 156144140 | 156144977 | 1,28 | ENSRNOG00000013536 | Cdc42      |
| P-STAT1 | 156809579 | 156809921 | 0,91 | ENSRNOG00000014368 | Eif4g3     |
| P-STAT1 | 157232503 | 157232834 | 0,91 | ENSRNOG00000016322 | Camk2n1    |
| P-STAT1 | 157536599 | 157537157 | 0,91 | ENSRNOG00000027731 | Ubx3       |
| P-STAT1 | 157536599 | 157537157 | 0,91 | ENSRNOG00000016647 | Pla2g2c    |
| P-STAT1 | 157539888 | 157540393 | 1,01 | ENSRNOG00000027731 | Ubx3       |
| P-STAT1 | 157654129 | 157654977 | 1,1  | ENSRNOG00000034617 | U1         |
| P-STAT1 | 157654129 | 157654977 | 1,1  | ENSRNOG00000016945 | Pla2g2a    |
| P-STAT1 | 157795519 | 157795951 | 1,01 | ENSRNOG00000017401 | TMCO4_RAT  |
| P-STAT1 | 158152859 | 158153308 | 1,14 | ENSRNOG00000018097 | RGD1310427 |
| P-STAT1 | 158178013 | 158178302 | 0,91 | ENSRNOG00000018183 | Rbaf600    |
| P-STAT1 | 158178942 | 158179396 | 0,87 | ENSRNOG00000018183 | Rbaf600    |
| P-STAT1 | 159614063 | 159614411 | 0,91 | ENSRNOG00000006855 | Padi4      |
| P-STAT1 | 159760410 | 159761056 | 1,1  | ENSRNOG00000007574 | Padi2      |
| P-STAT1 | 160732612 | 160733071 | 0,87 | ENSRNOG00000013628 | Cela2a     |
| P-STAT1 | 162224056 | 162224585 | 1,19 | ENSRNOG00000015264 | Lrrc38     |
| P-STAT1 | 163762181 | 163762950 | 1,01 | ENSRNOG00000016782 | Tnfrsf8    |
| P-STAT1 | 165016089 | 165016613 | 1,51 | ENSRNOG00000007763 | Plod1      |
| P-STAT1 | 165016089 | 165016613 | 1,51 | ENSRNOG00000007968 | RGD1305350 |
| P-STAT1 | 165018416 | 165018667 | 1,19 | ENSRNOG00000007968 | RGD1305350 |
| P-STAT1 | 165167152 | 165167600 | 0,87 | ENSRNOG00000008619 | Agtrap     |

|         |           |           |      |                    |            |
|---------|-----------|-----------|------|--------------------|------------|
| P-STAT1 | 166531981 | 166532456 | 0,87 | ENSRNOG00000015850 | Rbp7       |
| P-STAT1 | 166761244 | 166762291 | 1,14 | ENSRNOG00000016846 | Pik3cd     |
| P-STAT1 | 166763223 | 166763817 | 0,96 | ENSRNOG00000016846 | Pik3cd     |
| P-STAT1 | 168062120 | 168062452 | 0,96 | ENSRNOG00000018289 | RGD1560648 |
| P-STAT1 | 168143267 | 168143718 | 1,05 | ENSRNOG00000018393 | Uts2       |
| P-STAT1 | 168186613 | 168187067 | 1,37 | ENSRNOG00000018413 | Per3       |
| P-STAT1 | 169225060 | 169225806 | 0,96 | ENSRNOG00000009046 | Phf13      |
| P-STAT1 | 169406385 | 169406934 | 1,33 | ENSRNOG00000010580 | Acot7      |
| P-STAT1 | 171868093 | 171868522 | 0,87 | ENSRNOG00000024012 | Pex10      |
| P-STAT1 | 172213890 | 172214164 | 1,55 | ENSRNOG00000016385 | Gabrd      |
| P-STAT1 | 172391442 | 172392072 | 0,91 | ENSRNOG00000016936 | Nadk       |
| P-STAT1 | 172645360 | 172645609 | 0,82 | ENSRNOG00000036869 | LOC680723  |
| P-STAT1 | 172645360 | 172645609 | 0,82 | ENSRNOG00000043331 | LOC680734  |
| P-STAT1 | 172947901 | 172948242 | 1,33 | ENSRNOG00000020199 | RGD1311517 |
| P-STAT1 | 173067137 | 173067481 | 1,23 | ENSRNOG00000021392 | Noc2l      |
| P-STAT1 | 173067137 | 173067481 | 1,23 | ENSRNOG00000020295 | RGD1311019 |
| P-STAT1 | 173072988 | 173073832 | 0,91 | ENSRNOG00000020302 | Klhl17     |
| P-STAT1 | 1842072   | 1842541   | 0,92 | ENSRNOG00000005705 | RGD1562284 |
| P-STAT1 | 1842787   | 1843226   | 1,57 | ENSRNOG00000005705 | RGD1562284 |
| P-STAT1 | 3389691   | 3390062   | 1,25 | ENSRNOG00000007106 | Q497A5_RAT |
| P-STAT1 | 6864976   | 6865633   | 1,11 | ENSRNOG00000004526 | Cox7a2l    |
| P-STAT1 | 7990341   | 7990957   | 1,02 | ENSRNOG00000035006 | U6         |
| P-STAT1 | 7990341   | 7990957   | 1,02 | ENSRNOG00000005151 | Dync2li1   |
| P-STAT1 | 8061772   | 8062314   | 1,15 | ENSRNOG00000005420 | Abcg8      |
| P-STAT1 | 8063392   | 8064533   | 0,79 | ENSRNOG00000005250 | Abcg5      |
| P-STAT1 | 8063392   | 8064533   | 0,79 | ENSRNOG00000005420 | Abcg8      |
| P-STAT1 | 8067094   | 8067426   | 1,02 | ENSRNOG00000005250 | Abcg5      |
| P-STAT1 | 8169611   | 8169963   | 0,92 | ENSRNOG00000005877 | LPPRC_RAT  |
| P-STAT1 | 8451552   | 8451902   | 0,97 | ENSRNOG00000007326 | Prepl      |
| P-STAT1 | 8451552   | 8451902   | 0,97 | ENSRNOG00000044064 | U6         |
| P-STAT1 | 9013818   | 9014158   | 1,15 | ENSRNOG00000024544 | Six3       |
| P-STAT1 | 10396114  | 10396557  | 1,2  | ENSRNOG00000015566 | Atp6v1e2   |
| P-STAT1 | 10410511  | 10410955  | 1,34 | ENSRNOG00000015415 | Rhoq       |
| P-STAT1 | 10471058  | 10471413  | 1,25 | ENSRNOG00000015215 | Cript      |
| P-STAT1 | 13161151  | 13161709  | 1,2  | ENSRNOG00000016783 | Fshr       |
| P-STAT1 | 20899597  | 20900221  | 1,2  | ENSRNOG00000005610 | Yipf4      |
| P-STAT1 | 20931276  | 20931637  | 1,15 | ENSRNOG00000005810 | Nlrc4      |
| P-STAT1 | 21150313  | 21150558  | 0,83 | ENSRNOG00000006340 | Memo1      |
| P-STAT1 | 22776700  | 22777927  | 0,79 | ENSRNOG00000026742 | Ypel5      |
| P-STAT1 | 23833347  | 23833786  | 0,88 | ENSRNOG00000008806 | CLIP4_RAT  |
| P-STAT1 | 23992902  | 23993501  | 0,92 | ENSRNOG00000026316 | Wdr43      |
| P-STAT1 | 24064158  | 24064858  | 1,11 | ENSRNOG00000004534 | Spdya      |
| P-STAT1 | 24101673  | 24102042  | 1,02 | ENSRNOG00000004612 | Ppp1cb     |
| P-STAT1 | 24294258  | 24294602  | 0,97 | ENSRNOG00000026037 | Phlpb      |
| P-STAT1 | 24992011  | 24992646  | 0,92 | ENSRNOG00000004927 | Supt7l     |
| P-STAT1 | 25246194  | 25247223  | 0,92 | ENSRNOG00000026578 | Dnajc5g    |
| P-STAT1 | 25254084  | 25254433  | 1,43 | ENSRNOG00000006204 | Slc30a3    |
| P-STAT1 | 25256095  | 25256554  | 1,25 | ENSRNOG00000006204 | Slc30a3    |
| P-STAT1 | 25297863  | 25298407  | 0,88 | ENSRNOG00000026474 | Cad        |

|         |           |           |      |                    |            |
|---------|-----------|-----------|------|--------------------|------------|
| P-STAT1 | 25297863  | 25298407  | 0,88 | ENSRNOG00000006556 | Slc5a6     |
| P-STAT1 | 26044898  | 26045543  | 1,34 | ENSRNOG00000024905 | MGC94915   |
| P-STAT1 | 32458025  | 32459004  | 1,11 | ENSRNOG00000028783 | Wdr35l     |
| P-STAT1 | 32459635  | 32460091  | 0,92 | ENSRNOG00000028783 | Wdr35l     |
| P-STAT1 | 33072727  | 33073057  | 0,97 | ENSRNOG00000004210 | Osr1       |
| P-STAT1 | 33865176  | 33865505  | 0,88 | ENSRNOG00000039551 | Rdh14      |
| P-STAT1 | 37785530  | 37785979  | 1,34 | ENSRNOG00000004084 | Fam84a     |
| P-STAT1 | 41117144  | 41117498  | 1,2  | ENSRNOG00000005344 | Nol10      |
| P-STAT1 | 41121965  | 41122326  | 1,02 | ENSRNOG00000005344 | Nol10      |
| P-STAT1 | 42294800  | 42295259  | 0,92 | ENSRNOG00000000216 | Klf11      |
| P-STAT1 | 44112862  | 44113396  | 1,02 | ENSRNOG00000007539 | Rsad2      |
| P-STAT1 | 48463956  | 48464413  | 1,57 | ENSRNOG00000005144 | Tmem18     |
| P-STAT1 | 49209064  | 49209633  | 0,88 | ENSRNOG00000006364 | Dld        |
| P-STAT1 | 49304019  | 49304358  | 0,88 | ENSRNOG00000006878 | Slc26a3    |
| P-STAT1 | 50479569  | 50479913  | 1,71 | ENSRNOG00000009385 | Pik3cg     |
| P-STAT1 | 52576155  | 52576479  | 1,11 | ENSRNOG00000011091 | Ferd3l     |
| P-STAT1 | 52604429  | 52604789  | 1,29 | ENSRNOG00000011101 | Twist1     |
| P-STAT1 | 54241621  | 54241955  | 0,97 | ENSRNOG00000004342 | Ahr        |
| P-STAT1 | 55139991  | 55140254  | 1,15 | ENSRNOG00000006199 | LOC493574  |
| P-STAT1 | 55896080  | 55896748  | 1,2  | ENSRNOG00000006588 | Meox2      |
| P-STAT1 | 60775290  | 60775684  | 1,11 | ENSRNOG00000006368 | Lrrn3      |
| P-STAT1 | 71790635  | 71791528  | 1,06 | ENSRNOG00000005765 | Ap4s1      |
| P-STAT1 | 72162076  | 72162430  | 0,92 | ENSRNOG00000006727 | RGD1309138 |
| P-STAT1 | 72176366  | 72176605  | 0,88 | ENSRNOG00000038990 | Gpr33      |
| P-STAT1 | 74478302  | 74478958  | 1,34 | ENSRNOG00000005053 | Egln3      |
| P-STAT1 | 75648512  | 75648841  | 1,06 | ENSRNOG00000007114 | Psma6      |
| P-STAT1 | 75810059  | 75810408  | 1,02 | ENSRNOG00000030869 | Aldoa1     |
| P-STAT1 | 77682742  | 77683471  | 1,39 | ENSRNOG00000031938 | LOC314140  |
| P-STAT1 | 78027059  | 78027408  | 1,02 | ENSRNOG00000022791 | RGD1560556 |
| P-STAT1 | 86316962  | 86317411  | 0,92 | ENSRNOG00000004218 | Klhl28     |
| P-STAT1 | 86530222  | 86530873  | 0,83 | ENSRNOG00000023093 | LOC689296  |
| P-STAT1 | 91192198  | 91192830  | 1,02 | ENSRNOG00000004425 | B0K005_RAT |
| P-STAT1 | 91723559  | 91724601  | 1,43 | ENSRNOG00000004826 | Sos2       |
| P-STAT1 | 91772856  | 91773885  | 0,97 | ENSRNOG00000004857 | L2hgdh     |
| P-STAT1 | 91772856  | 91773885  | 0,97 | ENSRNOG00000004893 | Atp5s      |
| P-STAT1 | 91869270  | 91869804  | 0,88 | ENSRNOG00000038720 | Cdkl1      |
| P-STAT1 | 92103228  | 92103586  | 1,11 | ENSRNOG00000005264 | Sav1       |
| P-STAT1 | 92105358  | 92105924  | 1,11 | ENSRNOG00000005264 | Sav1       |
| P-STAT1 | 93090635  | 93091270  | 1,25 | ENSRNOG00000007851 | Psma3      |
| P-STAT1 | 96066220  | 96066669  | 1,11 | ENSRNOG00000004873 | Prkch      |
| P-STAT1 | 96475811  | 96476145  | 1,06 | ENSRNOG00000009296 | Snapc1     |
| P-STAT1 | 97909447  | 97909991  | 1,02 | ENSRNOG00000021919 | Q5RJS2_RAT |
| P-STAT1 | 98239171  | 98239538  | 1,57 | ENSRNOG00000021628 | Wdr89      |
| P-STAT1 | 98240364  | 98240733  | 1,11 | ENSRNOG00000021628 | Wdr89      |
| P-STAT1 | 99405438  | 99405907  | 0,88 | ENSRNOG00000007364 | Rab15      |
| P-STAT1 | 99556710  | 99557364  | 0,88 | ENSRNOG00000008049 | LOC362131  |
| P-STAT1 | 101308426 | 101308875 | 1,89 | ENSRNOG00000028351 | Fam71d     |
| P-STAT1 | 101309768 | 101310812 | 1,29 | ENSRNOG00000028351 | Fam71d     |
| P-STAT1 | 101646341 | 101646895 | 1,29 | ENSRNOG00000010646 | Tmem229b   |

|         |           |           |      |                     |            |
|---------|-----------|-----------|------|---------------------|------------|
| P-STAT1 | 101661892 | 101662346 | 0,97 | ENSRNOG00000010650  | Plekhh1    |
| P-STAT1 | 101902001 | 101902347 | 1,29 | ENSRNOG00000011139  | Arg2       |
| P-STAT1 | 101961539 | 101962087 | 1,06 | ENSRNOG00000011902  | Rdh11      |
| P-STAT1 | 101964048 | 101964897 | 0,92 | ENSRNOG00000011902  | Rdh11      |
| P-STAT1 | 102067423 | 102067990 | 1,39 | ENSRNOG00000028111  | Zfyve26    |
| P-STAT1 | 102067423 | 102067990 | 1,39 | ENSRNOG00000012332  | Rad51l1    |
| P-STAT1 | 104404873 | 104405335 | 1,06 | ENSRNOG00000005052  | Slc39a9    |
| P-STAT1 | 104751115 | 104751647 | 1,39 | ENSRNOG00000005794  | Slc10a1    |
| P-STAT1 | 105162923 | 105163602 | 0,88 | ENSRNOG00000029871  | Slc8a3     |
| P-STAT1 | 107886309 | 107886576 | 0,92 | ENSRNOG00000009653  | B2GVA9_RAT |
| P-STAT1 | 108201958 | 108202307 | 0,97 | ENSRNOG00000010553  | Pnma1      |
| P-STAT1 | 108203053 | 108203727 | 1,02 | ENSRNOG00000010553  | Pnma1      |
| P-STAT1 | 108520034 | 108520381 | 1,29 | ENSRNOG00000011419  | Aldh6a1    |
| P-STAT1 | 108742818 | 108743153 | 0,88 | ENSRNOG00000027645  | Tmem90a    |
| P-STAT1 | 108993139 | 108993486 | 1,62 | ENSRNOG00000004382  | RGD1307597 |
| P-STAT1 | 109331399 | 109331855 | 1,34 | ENSRNOG00000006744  | Acyp1      |
| P-STAT1 | 109331399 | 109331855 | 1,34 | ENSRNOG00000027115  | Fam164c    |
| P-STAT1 | 109388124 | 109388465 | 1,66 | ENSRNOG00000007001  | Nek9       |
| P-STAT1 | 109708788 | 109709725 | 1,39 | ENSRNOG00000008224  | Jdp2       |
| P-STAT1 | 110852482 | 110853050 | 1,02 | ENSRNOG00000010567  | Angel1     |
| P-STAT1 | 111158651 | 111159116 | 0,92 | ENSRNOG00000011334  | Tmem63c    |
| P-STAT1 | 111679825 | 111680277 | 0,97 | ENSRNOG00000012314  | LOC688717  |
| P-STAT1 | 111679825 | 111680277 | 0,97 | ENSRNOG000000035400 | U6         |
| P-STAT1 | 115022588 | 115023025 | 1,02 | ENSRNOG000000003972 | Tshr       |
| P-STAT1 | 115213171 | 115214311 | 1,25 | ENSRNOG000000004300 | Gtf2a1     |
| P-STAT1 | 115369405 | 115370047 | 0,92 | ENSRNOG000000004458 | Ston2      |
| P-STAT1 | 122785598 | 122786132 | 1,25 | ENSRNOG000000003955 | Spata7     |
| P-STAT1 | 123765529 | 123765978 | 1,34 | ENSRNOG000000004709 | Foxn3      |
| P-STAT1 | 124099408 | 124099869 | 0,92 | ENSRNOG000000003831 | Tdp1       |
| P-STAT1 | 124376720 | 124377059 | 0,88 | ENSRNOG000000003951 | Psmc1      |
| P-STAT1 | 125003344 | 125003771 | 0,92 | ENSRNOG000000004362 | Rps6ka5    |
| P-STAT1 | 127646065 | 127646934 | 0,88 | ENSRNOG000000009012 | Asb2       |
| P-STAT1 | 127716130 | 127716589 | 1,2  | ENSRNOG000000009166 | Ddx24      |
| P-STAT1 | 127924584 | 127925533 | 1,11 | ENSRNOG000000009438 | Serpina6   |
| P-STAT1 | 127942129 | 127942696 | 1,76 | ENSRNOG000000026297 | LOC299271  |
| P-STAT1 | 128044497 | 128044970 | 1,25 | ENSRNOG00000011141  | Serpina11  |
| P-STAT1 | 128104701 | 128105050 | 0,92 | ENSRNOG000000042634 | Serpina12  |
| P-STAT1 | 128134236 | 128134582 | 0,97 | ENSRNOG000000009788 | Serpina4   |
| P-STAT1 | 128434324 | 128434786 | 1,11 | ENSRNOG00000010478  | LOC299282  |
| P-STAT1 | 128507480 | 128508044 | 1,25 | ENSRNOG000000029253 | LOC690435  |
| P-STAT1 | 129744041 | 129744376 | 0,97 | ENSRNOG000000004454 | Bdkrb2     |
| P-STAT1 | 129755956 | 129756500 | 1,15 | ENSRNOG000000004488 | Bdkrb1     |
| P-STAT1 | 132543855 | 132544527 | 1,06 | ENSRNOG000000006985 | Ccnk       |
| P-STAT1 | 132976759 | 132977531 | 0,92 | ENSRNOG00000014476  | Evl        |
| P-STAT1 | 133038435 | 133038864 | 1,71 | ENSRNOG00000011716  | Degs2      |
| P-STAT1 | 133130197 | 133130548 | 1,76 | ENSRNOG000000004339 | Yy1        |
| P-STAT1 | 133368411 | 133368660 | 1,52 | ENSRNOG000000004733 | Wdr25      |
| P-STAT1 | 133371980 | 133372309 | 1,02 | ENSRNOG000000004733 | Wdr25      |
| P-STAT1 | 135405727 | 135406291 | 0,97 | ENSRNOG000000007184 | RGD1305298 |

|         |           |           |      |                     |            |
|---------|-----------|-----------|------|---------------------|------------|
| P-STAT1 | 136137389 | 136138154 | 1,34 | ENSRNOG00000009675  | Cdc42bbp   |
| P-STAT1 | 136193223 | 136193767 | 0,97 | ENSRNOG00000010165  | Tnfaip2    |
| P-STAT1 | 136493142 | 136493490 | 1,25 | ENSRNOG00000011542  | RGD1304719 |
| P-STAT1 | 136658596 | 136659220 | 1,02 | ENSRNOG00000012653  | Ppp1r13b   |
| P-STAT1 | 137354581 | 137354814 | 0,83 | ENSRNOG00000013128  | RGD1310269 |
| P-STAT1 | 138008546 | 138009198 | 1,02 | ENSRNOG00000014595  | Brf1       |
| P-STAT1 | 138587312 | 138587861 | 1,39 | ENSRNOG00000037524  | Adam6      |
| P-STAT1 | 143311289 | 143311633 | 0,92 | ENSRNOG00000004268  | Zfp386     |
| P-STAT1 | 143343770 | 143344225 | 0,88 | ENSRNOG00000004317  | Vipr2      |
| P-STAT1 | 143783610 | 143784304 | 1,43 | ENSRNOG00000005003  | Ptprn2     |
| P-STAT1 | 1465502   | 1466156   | 1,65 | ENSRNOG00000003076  | Rbms2      |
| P-STAT1 | 1586381   | 1586723   | 0,89 | ENSRNOG00000003254  | Il23a      |
| P-STAT1 | 1699245   | 1699887   | 0,89 | ENSRNOG000000041561 | SNORA79    |
| P-STAT1 | 1699245   | 1699887   | 0,89 | ENSRNOG000000023480 | Obfc2b     |
| P-STAT1 | 1699245   | 1699887   | 0,89 | ENSRNOG000000023456 | Q5XIRO_RAT |
| P-STAT1 | 1779671   | 1779985   | 0,8  | ENSRNOG00000003892  | Myl6       |
| P-STAT1 | 1779671   | 1779985   | 0,8  | ENSRNOG000000028837 | RGD1560334 |
| P-STAT1 | 1919651   | 1919940   | 1,34 | ENSRNOG000000005517 | Rps26      |
| P-STAT1 | 2010475   | 2011106   | 0,89 | ENSRNOG000000006469 | Cdk2       |
| P-STAT1 | 2120587   | 2120956   | 0,94 | ENSRNOG000000030120 | Ormdl2     |
| P-STAT1 | 2120587   | 2120956   | 0,94 | ENSRNOG000000030520 | Sarnp      |
| P-STAT1 | 2122396   | 2122860   | 0,89 | ENSRNOG000000030120 | Ormdl2     |
| P-STAT1 | 2222570   | 2223132   | 1,03 | ENSRNOG000000007784 | Bloc1s1    |
| P-STAT1 | 2566574   | 2567030   | 0,94 | ENSRNOG000000043125 | Olr881     |
| P-STAT1 | 2643676   | 2645020   | 0,8  | ENSRNOG000000031250 | Olr883     |
| P-STAT1 | 3453204   | 3454161   | 0,94 | ENSRNOG000000032262 | Olr901     |
| P-STAT1 | 3654579   | 3654933   | 0,85 | ENSRNOG000000031666 | Olr907     |
| P-STAT1 | 3687834   | 3688902   | 0,76 | ENSRNOG000000029000 | Olr1845    |
| P-STAT1 | 3733471   | 3734005   | 0,98 | ENSRNOG000000031137 | Olr883     |
| P-STAT1 | 4080915   | 4081544   | 0,94 | ENSRNOG000000030529 | Olr921     |
| P-STAT1 | 4365177   | 4365537   | 1,52 | ENSRNOG000000029842 | Olr931     |
| P-STAT1 | 4777414   | 4778180   | 0,85 | ENSRNOG000000003404 | Olr947     |
| P-STAT1 | 4835380   | 4835743   | 1,43 | ENSRNOG000000032325 | Olr950     |
| P-STAT1 | 6051248   | 6051697   | 0,98 | ENSRNOG000000033727 | Olr990     |
| P-STAT1 | 7915374   | 7915823   | 1,56 | ENSRNOG000000031687 | Olr1057    |
| P-STAT1 | 8001036   | 8001403   | 0,89 | ENSRNOG000000031181 | Olr1060    |
| P-STAT1 | 8088195   | 8088754   | 1,16 | ENSRNOG000000030311 | Olr1063    |
| P-STAT1 | 8119687   | 8120233   | 1,03 | ENSRNOG000000030970 | Olr1065    |
| P-STAT1 | 8469620   | 8469958   | 0,85 | ENSRNOG000000008460 | Olr1072    |
| P-STAT1 | 9688263   | 9688610   | 0,85 | ENSRNOG000000005370 | S1pr4      |
| P-STAT1 | 10015402  | 10015751  | 1,07 | ENSRNOG000000020383 | Dapk3      |
| P-STAT1 | 10131423  | 10131880  | 1,65 | ENSRNOG000000019924 | Thop1      |
| P-STAT1 | 10365577  | 10366040  | 0,89 | ENSRNOG000000019552 | Lsm7       |
| P-STAT1 | 11165613  | 11166008  | 1,16 | ENSRNOG000000013604 | Gpx4       |
| P-STAT1 | 11262833  | 11263162  | 1,07 | ENSRNOG000000012379 | WDR18_RAT  |
| P-STAT1 | 11304515  | 11305064  | 0,94 | ENSRNOG000000011954 | Kiss1r     |
| P-STAT1 | 11471507  | 11471758  | 0,8  | ENSRNOG000000024879 | Polrmt     |
| P-STAT1 | 11642326  | 11643416  | 0,85 | ENSRNOG000000007960 | Theg       |
| P-STAT1 | 12043790  | 12044419  | 1,03 | ENSRNOG000000039449 | Olr1075    |

|         |          |          |      |                    |             |
|---------|----------|----------|------|--------------------|-------------|
| P-STAT1 | 12044515 | 12045094 | 1,74 | ENSRNOG00000039449 | Olr1075     |
| P-STAT1 | 12102737 | 12103079 | 0,98 | ENSRNOG00000007669 | Olr1077     |
| P-STAT1 | 12106422 | 12106896 | 0,89 | ENSRNOG00000042551 | Olr1078     |
| P-STAT1 | 12173048 | 12173590 | 0,89 | ENSRNOG00000039444 | Olr1081     |
| P-STAT1 | 12194655 | 12195198 | 1,12 | ENSRNOG00000031936 | Olr1082     |
| P-STAT1 | 12603479 | 12603959 | 0,8  | ENSRNOG00000028512 | Ilvbl       |
| P-STAT1 | 12740252 | 12740596 | 0,89 | ENSRNOG00000004346 | Notch3      |
| P-STAT1 | 12740978 | 12741617 | 0,8  | ENSRNOG00000004346 | Notch3      |
| P-STAT1 | 12857129 | 12857663 | 1,25 | ENSRNOG00000006770 | Brd4        |
| P-STAT1 | 12892221 | 12893065 | 0,94 | ENSRNOG00000006559 | Akap8       |
| P-STAT1 | 12969486 | 12969961 | 0,85 | ENSRNOG00000006167 | Rasal3      |
| P-STAT1 | 12971497 | 12972061 | 1,43 | ENSRNOG00000006167 | Rasal3      |
| P-STAT1 | 13600791 | 13601136 | 0,89 | ENSRNOG00000004786 | Cyp4f1      |
| P-STAT1 | 13776634 | 13777178 | 1,03 | ENSRNOG00000026582 | RGD1310212  |
| P-STAT1 | 14530037 | 14530666 | 1,12 | ENSRNOG00000026094 | Vom2r54     |
| P-STAT1 | 16249319 | 16249763 | 0,94 | ENSRNOG00000007648 | Rab11b      |
| P-STAT1 | 18610718 | 18611157 | 0,89 | ENSRNOG00000030950 | LOC691708   |
| P-STAT1 | 19727427 | 19727764 | 1,07 | ENSRNOG00000004303 | Timp3       |
| P-STAT1 | 20746172 | 20746529 | 1,16 | ENSRNOG00000006987 | RGD1563325  |
| P-STAT1 | 20746172 | 20746529 | 1,16 | ENSRNOG00000006998 | Fhl4        |
| P-STAT1 | 21458680 | 21459209 | 1,43 | ENSRNOG00000008061 | Nuak1       |
| P-STAT1 | 22277192 | 22277521 | 0,89 | ENSRNOG00000008174 | Appl2       |
| P-STAT1 | 22950665 | 22951036 | 0,98 | ENSRNOG00000008885 | Chst11      |
| P-STAT1 | 22951578 | 22952034 | 0,85 | ENSRNOG00000008885 | Chst11      |
| P-STAT1 | 23088967 | 23089319 | 2,1  | ENSRNOG00000029645 | Eid3        |
| P-STAT1 | 23249201 | 23249556 | 1,52 | ENSRNOG00000011072 | Hcfc2       |
| P-STAT1 | 23324917 | 23325156 | 1,16 | ENSRNOG00000027124 | Tdg         |
| P-STAT1 | 23324917 | 23325156 | 1,16 | ENSRNOG00000026982 | LOC691921   |
| P-STAT1 | 24174404 | 24174843 | 1,79 | ENSRNOG00000004302 | Pah         |
| P-STAT1 | 24845969 | 24846524 | 0,89 | ENSRNOG00000004682 | LOC10031087 |
| P-STAT1 | 24845969 | 24846524 | 0,89 | ENSRNOG00000004727 | Nup37       |
| P-STAT1 | 25199941 | 25200692 | 0,76 | ENSRNOG00000005487 | CHPT1_RAT   |
| P-STAT1 | 25404722 | 25405134 | 0,94 | ENSRNOG00000043412 | RGD1561102  |
| P-STAT1 | 25404722 | 25405134 | 0,94 | ENSRNOG00000005763 | Arl1        |
| P-STAT1 | 28112553 | 28113309 | 0,85 | ENSRNOG00000008797 | Tmpo        |
| P-STAT1 | 30191857 | 30192595 | 0,89 | ENSRNOG00000004148 | Pctk2       |
| P-STAT1 | 31349778 | 31350234 | 1,79 | ENSRNOG00000007407 | Ndufa12     |
| P-STAT1 | 36889952 | 36890186 | 1,03 | ENSRNOG00000023896 | Dusp6       |
| P-STAT1 | 41112034 | 41112381 | 1,12 | ENSRNOG00000004390 | Alx1        |
| P-STAT1 | 41498635 | 41499091 | 0,98 | ENSRNOG00000027468 | Slc6a15     |
| P-STAT1 | 45967531 | 45968173 | 0,89 | ENSRNOG00000004527 | Lin7a       |
| P-STAT1 | 46400479 | 46401436 | 0,85 | ENSRNOG00000032479 | Ptprq       |
| P-STAT1 | 50315091 | 50315445 | 1,03 | ENSRNOG00000026913 | Bbs10       |
| P-STAT1 | 50505757 | 50506106 | 1,12 | ENSRNOG00000003890 | Nap1l1      |
| P-STAT1 | 54021330 | 54021686 | 1,21 | ENSRNOG00000005278 | Trhde       |
| P-STAT1 | 54573967 | 54574416 | 1,03 | ENSRNOG00000003923 | Rab21       |
| P-STAT1 | 55883883 | 55884429 | 1,07 | ENSRNOG00000004909 | Cnot2       |
| P-STAT1 | 56583209 | 56584126 | 1,61 | ENSRNOG00000005790 | RGD1306474  |
| P-STAT1 | 56583209 | 56584126 | 1,61 | ENSRNOG00000034139 | B2RYD4_RAT  |

|         |           |           |      |                    |            |
|---------|-----------|-----------|------|--------------------|------------|
| P-STAT1 | 56587814  | 56588138  | 1,12 | ENSRNOG00000034139 | B2RYD4_RAT |
| P-STAT1 | 56611946  | 56612230  | 0,85 | ENSRNOG00000005825 | Lyz2       |
| P-STAT1 | 57058111  | 57058665  | 1,16 | ENSRNOG00000027622 | Slc35e3    |
| P-STAT1 | 57105388  | 57106027  | 1,03 | ENSRNOG00000006541 | Nup107     |
| P-STAT1 | 57621810  | 57622260  | 0,94 | ENSRNOG00000007468 | Ifng       |
| P-STAT1 | 60896863  | 60897710  | 0,98 | ENSRNOG00000005528 | Tbk1       |
| P-STAT1 | 62224804  | 62225233  | 0,89 | ENSRNOG00000004400 | Avpr1a     |
| P-STAT1 | 62962033  | 62962473  | 1,21 | ENSRNOG00000023202 | Usp15      |
| P-STAT1 | 65316038  | 65316690  | 1,03 | ENSRNOG00000007839 | Slc16a7    |
| P-STAT1 | 65906249  | 65907291  | 0,85 | ENSRNOG00000031425 | LOC500846  |
| P-STAT1 | 67478100  | 67478424  | 1,21 | ENSRNOG00000008050 | Stac3      |
| P-STAT1 | 67499964  | 67500313  | 1,43 | ENSRNOG00000008106 | Shmt2      |
| P-STAT1 | 67717936  | 67718185  | 1,25 | ENSRNOG00000004229 | Tac2       |
| P-STAT1 | 67833059  | 67833788  | 1,43 | ENSRNOG00000004391 | Rdh7       |
| P-STAT1 | 68287596  | 68288058  | 1,03 | ENSRNOG00000004936 | Sdc2       |
| P-STAT1 | 69522905  | 69523176  | 0,94 | ENSRNOG00000006870 | Mtdh       |
| P-STAT1 | 71479166  | 71479810  | 1,03 | ENSRNOG00000010807 | Cox6c      |
| P-STAT1 | 71698009  | 71698964  | 2,01 | ENSRNOG00000010078 | Spag1      |
| P-STAT1 | 72282875  | 72283319  | 1,43 | ENSRNOG00000031383 | LOC362901  |
| P-STAT1 | 72308963  | 72309406  | 1,12 | ENSRNOG00000008195 | 1433Z_RAT  |
| P-STAT1 | 73736850  | 73737326  | 1,56 | ENSRNOG00000006578 | Odf1       |
| P-STAT1 | 74425709  | 74426038  | 0,85 | ENSRNOG00000004697 | BAALC_RAT  |
| P-STAT1 | 75447892  | 75448351  | 0,85 | ENSRNOG00000004298 | Dpys       |
| P-STAT1 | 78452904  | 78453258  | 2,1  | ENSRNOG00000005854 | Angpt1     |
| P-STAT1 | 79045321  | 79045960  | 0,89 | ENSRNOG00000027690 | Eif3e      |
| P-STAT1 | 80297835  | 80298379  | 0,94 | ENSRNOG00000004681 | Eny2       |
| P-STAT1 | 80302731  | 80303304  | 1,34 | ENSRNOG00000024929 | Nudcd1     |
| P-STAT1 | 80513166  | 80513522  | 1,21 | ENSRNOG00000004220 | Ebag9      |
| P-STAT1 | 87080220  | 87080857  | 1,12 | ENSRNOG00000024998 | Trps1      |
| P-STAT1 | 90635585  | 90636113  | 0,89 | ENSRNOG00000008336 | Tnfrsf11b  |
| P-STAT1 | 90785531  | 90785909  | 1,03 | ENSRNOG00000008591 | Colec10    |
| P-STAT1 | 90942180  | 90942633  | 1,43 | ENSRNOG00000008615 | Mal2       |
| P-STAT1 | 91600070  | 91600545  | 0,94 | ENSRNOG00000034022 | Taf2       |
| P-STAT1 | 91602933  | 91603574  | 1,12 | ENSRNOG00000034022 | Taf2       |
| P-STAT1 | 91801601  | 91802529  | 0,89 | ENSRNOG00000026415 | Col14a1    |
| P-STAT1 | 93258540  | 93259096  | 0,89 | ENSRNOG00000004854 | Has2       |
| P-STAT1 | 94596578  | 94597037  | 0,85 | ENSRNOG00000005551 | Derl1      |
| P-STAT1 | 94597779  | 94598138  | 1,34 | ENSRNOG00000005551 | Derl1      |
| P-STAT1 | 94779132  | 94779586  | 0,94 | ENSRNOG00000006412 | Zhx1       |
| P-STAT1 | 94851119  | 94851573  | 1,43 | ENSRNOG00000025604 | Atad2      |
| P-STAT1 | 95125973  | 95126313  | 1,34 | ENSRNOG00000007980 | Anxa13     |
| P-STAT1 | 96163656  | 96164212  | 0,85 | ENSRNOG00000003964 | Nsmce2     |
| P-STAT1 | 96439706  | 96440435  | 1,43 | ENSRNOG00000004100 | Trib1      |
| P-STAT1 | 101124589 | 101125127 | 1,25 | ENSRNOG00000004982 | Gsdmc1     |
| P-STAT1 | 103148165 | 103148531 | 0,98 | ENSRNOG00000025528 | Efr3a      |
| P-STAT1 | 104475794 | 104476148 | 1,65 | ENSRNOG00000008209 | St3gal1    |
| P-STAT1 | 106538505 | 106538843 | 0,89 | ENSRNOG00000009539 | Khdrbs3    |
| P-STAT1 | 112831956 | 112832365 | 0,98 | ENSRNOG00000005929 | RGD1359378 |
| P-STAT1 | 112876761 | 112877615 | 1,12 | ENSRNOG00000026133 | Ly6d       |

|         |           |           |      |                    |            |
|---------|-----------|-----------|------|--------------------|------------|
| P-STAT1 | 112983312 | 112983766 | 0,8  | ENSRNOG00000032450 | C11B1_RAT  |
| P-STAT1 | 112986672 | 112987024 | 1,16 | ENSRNOG00000032450 | C11B1_RAT  |
| P-STAT1 | 113018077 | 113018626 | 0,94 | ENSRNOG00000006598 | Cyp11b3    |
| P-STAT1 | 113021903 | 113022952 | 0,67 | ENSRNOG00000006598 | Cyp11b3    |
| P-STAT1 | 113867672 | 113867911 | 0,98 | ENSRNOG00000007939 | Naprt1     |
| P-STAT1 | 113879723 | 113880477 | 1,16 | ENSRNOG00000021638 | Eef1d      |
| P-STAT1 | 113928702 | 113929131 | 1,03 | ENSRNOG00000008708 | Pycrl      |
| P-STAT1 | 113929992 | 113930436 | 1,52 | ENSRNOG00000008708 | Pycrl      |
| P-STAT1 | 114592733 | 114593095 | 0,85 | ENSRNOG00000025497 | Fbxl6      |
| P-STAT1 | 114628987 | 114629336 | 1,03 | ENSRNOG00000030334 | Adck5      |
| P-STAT1 | 114721418 | 114721747 | 0,94 | ENSRNOG00000015371 | B0BN92_RAT |
| P-STAT1 | 114721418 | 114721747 | 0,94 | ENSRNOG00000015450 | Ppp1r16a   |
| P-STAT1 | 114749173 | 114749526 | 2,63 | ENSRNOG00000015685 | Mfsd3      |
| P-STAT1 | 114949861 | 114950999 | 1,29 | ENSRNOG00000004484 | Commd5     |
| P-STAT1 | 114949861 | 114950999 | 1,29 | ENSRNOG00000004497 | Rpl8       |
| P-STAT1 | 115388338 | 115388670 | 1,25 | ENSRNOG00000004688 | Rbm9       |
| P-STAT1 | 116128760 | 116129089 | 0,89 | ENSRNOG00000006471 | Pvalb      |
| P-STAT1 | 116359057 | 116360303 | 0,98 | ENSRNOG00000000186 | Tst        |
| P-STAT1 | 116359057 | 116360303 | 0,98 | ENSRNOG00000000185 | Mpst       |
| P-STAT1 | 116531814 | 116532685 | 0,89 | ENSRNOG00000007350 | Rac2       |
| P-STAT1 | 117004119 | 117004480 | 0,85 | ENSRNOG00000010596 | Gcat       |
| P-STAT1 | 117211668 | 117211992 | 1,07 | ENSRNOG00000011507 | Pick1      |
| P-STAT1 | 117213371 | 117213738 | 1,21 | ENSRNOG00000011507 | Pick1      |
| P-STAT1 | 117326968 | 117327793 | 0,89 | ENSRNOG00000012886 | Maff       |
| P-STAT1 | 118429986 | 118430445 | 1,34 | ENSRNOG00000017434 | Mgat3      |
| P-STAT1 | 118544235 | 118544799 | 1,12 | ENSRNOG00000017847 | Rps19bp1   |
| P-STAT1 | 118848480 | 118848835 | 1,07 | ENSRNOG00000025344 | Enthd1     |
| P-STAT1 | 118850365 | 118851114 | 0,8  | ENSRNOG00000025344 | Enthd1     |
| P-STAT1 | 120079768 | 120080307 | 0,85 | ENSRNOG00000031789 | Q66H32_RAT |
| P-STAT1 | 120212093 | 120212447 | 1,03 | ENSRNOG00000024177 | Tob2       |
| P-STAT1 | 120219511 | 120219760 | 1,12 | ENSRNOG00000024128 | Aco2       |
| P-STAT1 | 120400311 | 120400848 | 1,29 | ENSRNOG00000005577 | Pppde2     |
| P-STAT1 | 120400311 | 120400848 | 1,29 | ENSRNOG00000006392 | Xrcc6      |
| P-STAT1 | 121124235 | 121125485 | 1,34 | ENSRNOG00000022932 | Serhl2     |
| P-STAT1 | 121814997 | 121815510 | 1,12 | ENSRNOG00000010834 | Mpped1     |
| P-STAT1 | 123334345 | 123334878 | 0,98 | ENSRNOG00000014637 | Atxn10     |
| P-STAT1 | 123860510 | 123861389 | 0,67 | ENSRNOG00000016148 | Gtse1      |
| P-STAT1 | 127124977 | 127125514 | 0,85 | ENSRNOG00000004591 | Alg12      |
| P-STAT1 | 127292947 | 127293481 | 1,34 | ENSRNOG00000032871 | Mlc1       |
| P-STAT1 | 127292947 | 127293481 | 1,34 | ENSRNOG00000031093 | Mov10l1    |
| P-STAT1 | 127422190 | 127422446 | 0,85 | ENSRNOG00000006028 | Tubgcp6    |
| P-STAT1 | 127631574 | 127632123 | 0,98 | ENSRNOG00000008694 | Miox       |
| P-STAT1 | 127747332 | 127747658 | 1,07 | ENSRNOG00000010438 | Cpt1b_v2   |
| P-STAT1 | 127751081 | 127751612 | 0,94 | ENSRNOG00000010438 | Cpt1b_v2   |
| P-STAT1 | 127751081 | 127751612 | 0,94 | ENSRNOG00000011404 | Chkb       |
| P-STAT1 | 128173491 | 128173850 | 1,43 | ENSRNOG00000014296 | Syt10      |
| P-STAT1 | 128175110 | 128175596 | 1,38 | ENSRNOG00000014296 | Syt10      |
| P-STAT1 | 130296521 | 130296882 | 0,89 | ENSRNOG00000037025 | Smgc       |
| P-STAT1 | 131111125 | 131111562 | 0,98 | ENSRNOG00000022844 | Pdzrn4     |

|         |           |           |      |                    |             |
|---------|-----------|-----------|------|--------------------|-------------|
| P-STAT1 | 131112621 | 131113185 | 0,89 | ENSRNOG00000022844 | Pdzrn4      |
| P-STAT1 | 133055614 | 133056278 | 1,07 | ENSRNOG00000022570 | Pus7l       |
| P-STAT1 | 133055614 | 133056278 | 1,07 | ENSRNOG00000005965 | Irak4       |
| P-STAT1 | 133102829 | 133103460 | 0,94 | ENSRNOG00000022507 | Twf1        |
| P-STAT1 | 135378186 | 135378939 | 1,25 | ENSRNOG00000006305 | Slc38a2     |
| P-STAT1 | 135380998 | 135381553 | 1,25 | ENSRNOG00000006305 | Slc38a2     |
| P-STAT1 | 135999863 | 136000407 | 0,85 | ENSRNOG00000022807 | Fam113b     |
| P-STAT1 | 136855375 | 136855733 | 1,65 | ENSRNOG00000010099 | Asb8        |
| P-STAT1 | 136997517 | 136998081 | 0,89 | ENSRNOG00000029545 | H1fnt       |
| P-STAT1 | 137052653 | 137053207 | 1,16 | ENSRNOG00000031284 | Olr1104     |
| P-STAT1 | 137078769 | 137079120 | 1,21 | ENSRNOG00000032839 | Olr1105     |
| P-STAT1 | 137227103 | 137227547 | 1,12 | ENSRNOG00000010811 | Lalba       |
| P-STAT1 | 137239717 | 137240166 | 1,07 | ENSRNOG00000031503 | Olr1111     |
| P-STAT1 | 137475724 | 137476050 | 1,12 | ENSRNOG00000031424 | Ccdc65      |
| P-STAT1 | 137545951 | 137546180 | 0,85 | ENSRNOG00000014393 | Wnt10b      |
| P-STAT1 | 137556905 | 137557452 | 0,85 | ENSRNOG00000014627 | Wnt1        |
| P-STAT1 | 138015444 | 138015670 | 0,85 | ENSRNOG00000029879 | Mcrs1       |
| P-STAT1 | 138015444 | 138015670 | 0,85 | ENSRNOG00000045199 | SNORA70     |
| P-STAT1 | 138334224 | 138334673 | 1,25 | ENSRNOG00000017685 | Aqp5        |
| P-STAT1 | 138338449 | 138338787 | 1,7  | ENSRNOG00000017685 | Aqp5        |
| P-STAT1 | 139299576 | 139299916 | 1,43 | ENSRNOG00000032395 | Tcfcp2      |
| P-STAT1 | 139406247 | 139406776 | 0,98 | ENSRNOG00000030718 | Smagp       |
| P-STAT1 | 139453295 | 139453744 | 1,29 | ENSRNOG00000004725 | Cela1       |
| P-STAT1 | 139454080 | 139454830 | 0,8  | ENSRNOG00000004725 | Cela1       |
| P-STAT1 | 139683223 | 139683673 | 1,07 | ENSRNOG00000005309 | Scn8a       |
| P-STAT1 | 140219047 | 140219381 | 1,7  | ENSRNOG00000008367 | Krt86       |
| P-STAT1 | 140270407 | 140270864 | 1,03 | ENSRNOG00000008436 | Krt85       |
| P-STAT1 | 140318348 | 140318793 | 1,87 | ENSRNOG00000009105 | Kb15        |
| P-STAT1 | 140329511 | 140329862 | 0,89 | ENSRNOG00000043203 | K2C75_RAT   |
| P-STAT1 | 140549208 | 140549557 | 1,25 | ENSRNOG00000028996 | Krt1        |
| P-STAT1 | 140570368 | 140570702 | 1,61 | ENSRNOG00000036865 | K2C1B_RAT   |
| P-STAT1 | 140883882 | 140884513 | 0,89 | ENSRNOG00000010977 | Igfbp6      |
| P-STAT1 | 141072542 | 141073291 | 1,47 | ENSRNOG00000012985 | Pfdn5       |
| P-STAT1 | 141215265 | 141215726 | 1,43 | ENSRNOG00000042094 | Prr13       |
| P-STAT1 | 141266965 | 141267576 | 1,21 | ENSRNOG00000042355 | TRBP2_RAT   |
| P-STAT1 | 141371789 | 141372126 | 1,07 | ENSRNOG00000015269 | Atf7        |
| P-STAT1 | 141697122 | 141697556 | 1,03 | ENSRNOG00000016116 | Hoxc12      |
| P-STAT1 | 141774167 | 141774513 | 0,89 | ENSRNOG00000036514 | rno-mir-615 |
| P-STAT1 | 141774167 | 141774513 | 0,89 | ENSRNOG00000016598 | Hoxc5       |
| P-STAT1 | 141776498 | 141777036 | 0,89 | ENSRNOG00000036514 | rno-mir-615 |
| P-STAT1 | 141776498 | 141777036 | 0,89 | ENSRNOG00000016598 | Hoxc5       |
| P-STAT1 | 141796324 | 141796954 | 0,98 | ENSRNOG00000016613 | Hoxc4       |
| P-STAT1 | 142221125 | 142221564 | 0,98 | ENSRNOG00000036834 | Gpr84       |
| P-STAT1 | 142252928 | 142253422 | 0,98 | ENSRNOG00000036833 | Zfp385a     |
| P-STAT1 | 142276496 | 142276865 | 1,16 | ENSRNOG00000036832 | Itga5       |
| P-STAT1 | 142439734 | 142440063 | 2,1  | ENSRNOG00000036827 | Ppp1r1a     |
| P-STAT1 | 112363    | 113006    | 1,15 | ENSRNOG00000029876 | Gucy1a2     |
| P-STAT1 | 908796    | 909365    | 0,92 | ENSRNOG00000022245 | MGC105560   |
| P-STAT1 | 2024595   | 2025445   | 1,01 | ENSRNOG00000007372 | Casp1       |

|         |          |          |      |                     |            |
|---------|----------|----------|------|---------------------|------------|
| P-STAT1 | 4157931  | 4158481  | 1,15 | ENSRNOG00000008478  | Mmp13      |
| P-STAT1 | 4332743  | 4333112  | 0,92 | ENSRNOG000000032353 | Mmp1a      |
| P-STAT1 | 4366407  | 4366773  | 0,88 | ENSRNOG000000032832 | Mmp10      |
| P-STAT1 | 4401886  | 4402243  | 2,3  | ENSRNOG000000009907 | Mmp8       |
| P-STAT1 | 4463194  | 4463547  | 0,92 | ENSRNOG000000021896 | Mmp20      |
| P-STAT1 | 4465578  | 4465927  | 1,71 | ENSRNOG000000021896 | Mmp20      |
| P-STAT1 | 4667572  | 4668324  | 0,92 | ENSRNOG000000010602 | Birc2      |
| P-STAT1 | 4670105  | 4670459  | 0,92 | ENSRNOG000000010602 | Birc2      |
| P-STAT1 | 10554303 | 10554753 | 1,15 | ENSRNOG000000005923 | Mtmr2      |
| P-STAT1 | 10555988 | 10556547 | 1,66 | ENSRNOG000000005923 | Mtmr2      |
| P-STAT1 | 10624836 | 10625303 | 1,11 | ENSRNOG000000024863 | Fam76b     |
| P-STAT1 | 10626091 | 10626942 | 1,11 | ENSRNOG000000006792 | Cep57      |
| P-STAT1 | 10626091 | 10626942 | 1,11 | ENSRNOG000000024863 | Fam76b     |
| P-STAT1 | 11647283 | 11648826 | 1,06 | ENSRNOG000000030318 | Gpr83      |
| P-STAT1 | 12039836 | 12040270 | 1,15 | ENSRNOG000000010480 | LOC500947  |
| P-STAT1 | 12082312 | 12082841 | 1,38 | ENSRNOG000000010496 | Med17      |
| P-STAT1 | 12084407 | 12084745 | 1,01 | ENSRNOG000000010496 | Med17      |
| P-STAT1 | 13095786 | 13096345 | 1,24 | ENSRNOG000000031522 | LOC689840  |
| P-STAT1 | 13286642 | 13286974 | 1,06 | ENSRNOG000000011585 | Fat3       |
| P-STAT1 | 14649867 | 14650216 | 1,01 | ENSRNOG000000031660 | LOC500948  |
| P-STAT1 | 16105759 | 16106188 | 0,88 | ENSRNOG000000033766 | Olr1115    |
| P-STAT1 | 16162742 | 16163576 | 0,88 | ENSRNOG000000032466 | Olr1117    |
| P-STAT1 | 16256456 | 16256912 | 1,06 | ENSRNOG000000034283 | Olr1119    |
| P-STAT1 | 16915917 | 16917000 | 0,78 | ENSRNOG000000030080 | Olr1124    |
| P-STAT1 | 17054337 | 17054713 | 0,97 | ENSRNOG000000029054 | Olr1128    |
| P-STAT1 | 17104573 | 17105116 | 1,11 | ENSRNOG000000039921 | Olr1130    |
| P-STAT1 | 17280074 | 17280518 | 1,11 | ENSRNOG000000033500 | Olr1137    |
| P-STAT1 | 17755318 | 17755754 | 1,38 | ENSRNOG000000030368 | Olr1149    |
| P-STAT1 | 18791314 | 18791663 | 1,34 | ENSRNOG000000032787 | Olr1177    |
| P-STAT1 | 19905730 | 19906100 | 1,2  | ENSRNOG000000040957 | SNORD105   |
| P-STAT1 | 19905730 | 19906100 | 1,2  | ENSRNOG000000020608 | Q5FVQ2_RAT |
| P-STAT1 | 19905730 | 19906100 | 1,2  | ENSRNOG000000020603 | Angptl6    |
| P-STAT1 | 20511173 | 20511537 | 0,88 | ENSRNOG000000007158 | TGT_RAT    |
| P-STAT1 | 20696092 | 20696951 | 1,47 | ENSRNOG000000009255 | RGD1309188 |
| P-STAT1 | 20700836 | 20701332 | 1,29 | ENSRNOG000000022043 | Yipf2      |
| P-STAT1 | 20968713 | 20969040 | 0,88 | ENSRNOG000000010652 | Dock6      |
| P-STAT1 | 21093723 | 21094072 | 1,57 | ENSRNOG000000013027 | Rgl3       |
| P-STAT1 | 26571951 | 26572605 | 1,06 | ENSRNOG000000032461 | Bin2a      |
| P-STAT1 | 31222654 | 31222903 | 0,88 | ENSRNOG000000008515 | Tmem45b    |
| P-STAT1 | 32479942 | 32480737 | 1,01 | ENSRNOG000000008941 | Ets1       |
| P-STAT1 | 35237966 | 35238395 | 1,15 | ENSRNOG000000011789 | Cdon       |
| P-STAT1 | 38043271 | 38043810 | 1,2  | ENSRNOG000000030391 | Ei24       |
| P-STAT1 | 38074674 | 38075448 | 1,01 | ENSRNOG000000006075 | Fez1       |
| P-STAT1 | 38460027 | 38460371 | 0,88 | ENSRNOG000000008757 | Tmem218    |
| P-STAT1 | 38654828 | 38655566 | 0,97 | ENSRNOG000000031347 | Robo4      |
| P-STAT1 | 38914067 | 38914410 | 0,97 | ENSRNOG000000031675 | Panx3      |
| P-STAT1 | 39003497 | 39003942 | 1,15 | ENSRNOG000000030895 | Olr1195    |
| P-STAT1 | 39342042 | 39342499 | 1,2  | ENSRNOG000000031123 | Olr1203    |
| P-STAT1 | 39343775 | 39344444 | 0,88 | ENSRNOG000000031123 | Olr1203    |

|         |          |          |      |                    |              |
|---------|----------|----------|------|--------------------|--------------|
| P-STAT1 | 39419570 | 39420623 | 1,01 | ENSRNOG00000031451 | Olr1206      |
| P-STAT1 | 39589568 | 39590215 | 1,01 | ENSRNOG00000030794 | Olr1213      |
| P-STAT1 | 40318637 | 40319099 | 0,88 | ENSRNOG00000031909 | Olr1218      |
| P-STAT1 | 40319940 | 40320795 | 1,06 | ENSRNOG00000031909 | Olr1218      |
| P-STAT1 | 40360112 | 40360553 | 1,06 | ENSRNOG00000030341 | Olr1222      |
| P-STAT1 | 40492991 | 40493947 | 0,83 | ENSRNOG00000033334 | Olr1230      |
| P-STAT1 | 40566783 | 40567261 | 0,97 | ENSRNOG00000025356 | Olr1236      |
| P-STAT1 | 40606423 | 40606795 | 1,43 | ENSRNOG00000034072 | Olr1240      |
| P-STAT1 | 40667274 | 40667630 | 0,88 | ENSRNOG00000030076 | Olr1244      |
| P-STAT1 | 40675710 | 40676461 | 0,83 | ENSRNOG00000029002 | Olr1245      |
| P-STAT1 | 40772310 | 40772867 | 0,92 | ENSRNOG00000034224 | Olr1252      |
| P-STAT1 | 40916453 | 40916782 | 0,92 | ENSRNOG00000032383 | Olr1259      |
| P-STAT1 | 41082262 | 41082599 | 1,34 | ENSRNOG00000031423 | Olr1265      |
| P-STAT1 | 41093198 | 41094149 | 0,83 | ENSRNOG00000031054 | Olr1266      |
| P-STAT1 | 41163727 | 41164179 | 1,01 | ENSRNOG00000012079 | Olr1271      |
| P-STAT1 | 41205061 | 41205699 | 0,97 | ENSRNOG00000032751 | Olr1274      |
| P-STAT1 | 41631202 | 41631616 | 0,97 | ENSRNOG00000030512 | Olr1292      |
| P-STAT1 | 41713819 | 41714468 | 0,92 | ENSRNOG00000005870 | Olr1297      |
| P-STAT1 | 42299347 | 42300011 | 1,06 | ENSRNOG00000039245 | Olr1301      |
| P-STAT1 | 42513510 | 42513860 | 1,38 | ENSRNOG00000029102 | Olr1311      |
| P-STAT1 | 42514125 | 42514783 | 0,97 | ENSRNOG00000029102 | Olr1311      |
| P-STAT1 | 42517075 | 42517704 | 0,88 | ENSRNOG00000029102 | Olr1311      |
| P-STAT1 | 42542939 | 42543391 | 0,92 | ENSRNOG00000031942 | Olr1313      |
| P-STAT1 | 42726173 | 42727275 | 1,24 | ENSRNOG00000043359 | Olr1321      |
| P-STAT1 | 42854195 | 42854714 | 1,01 | ENSRNOG00000032457 | Olr1328      |
| P-STAT1 | 42907119 | 42907757 | 1,06 | ENSRNOG00000029468 | Olr1332      |
| P-STAT1 | 43020871 | 43021320 | 1,2  | ENSRNOG00000042278 | Olr1339      |
| P-STAT1 | 43023087 | 43023650 | 0,83 | ENSRNOG00000042278 | Olr1339      |
| P-STAT1 | 43139283 | 43140132 | 0,97 | ENSRNOG00000006303 | Olr1341      |
| P-STAT1 | 43139283 | 43140132 | 0,97 | ENSRNOG00000006312 | Zfp202       |
| P-STAT1 | 43784820 | 43785054 | 1,8  | ENSRNOG00000034066 | RGD1559849   |
| P-STAT1 | 43784820 | 43785054 | 1,8  | ENSRNOG00000035145 | SNORD14      |
| P-STAT1 | 43784820 | 43785054 | 1,8  | ENSRNOG00000035153 | SNORD14      |
| P-STAT1 | 43784820 | 43785054 | 1,8  | ENSRNOG00000035684 | SNORD14      |
| P-STAT1 | 44566547 | 44566896 | 2,12 | ENSRNOG00000039200 | 2610203C20F  |
| P-STAT1 | 44566547 | 44566896 | 2,12 | ENSRNOG00000035550 | rno-mir-125b |
| P-STAT1 | 45239290 | 45239741 | 1,15 | ENSRNOG00000008305 | Sc5dl        |
| P-STAT1 | 47085308 | 47085657 | 1,29 | ENSRNOG00000007613 | C1qtnf5      |
| P-STAT1 | 47375705 | 47376071 | 0,97 | ENSRNOG00000011904 | Trappc4      |
| P-STAT1 | 48909657 | 48909986 | 1,06 | ENSRNOG00000017628 | Tagln        |
| P-STAT1 | 51884777 | 51885342 | 1,43 | ENSRNOG00000005930 | Nnmt         |
| P-STAT1 | 52357440 | 52357791 | 1,11 | ENSRNOG00000008058 | Tmprss5      |
| P-STAT1 | 52359290 | 52359744 | 0,88 | ENSRNOG00000008058 | Tmprss5      |
| P-STAT1 | 52801105 | 52801654 | 1,15 | ENSRNOG00000008595 | Ttc12        |
| P-STAT1 | 53851894 | 53852849 | 0,83 | ENSRNOG00000024346 | LOC363060    |
| P-STAT1 | 54100881 | 54101208 | 1,24 | ENSRNOG00000028416 | LOC689959    |
| P-STAT1 | 54102342 | 54103041 | 1,24 | ENSRNOG00000010524 | Cryab        |
| P-STAT1 | 54102342 | 54103041 | 1,24 | ENSRNOG00000028416 | LOC689959    |
| P-STAT1 | 54122311 | 54122846 | 1,24 | ENSRNOG00000010743 | Fdxacb1      |

|         |          |          |      |                    |            |
|---------|----------|----------|------|--------------------|------------|
| P-STAT1 | 54431408 | 54432062 | 0,83 | ENSRNOG00000011277 | Btg4       |
| P-STAT1 | 54534036 | 54534485 | 1,2  | ENSRNOG00000011500 | Pou2af1    |
| P-STAT1 | 54535261 | 54535517 | 0,83 | ENSRNOG00000011500 | Pou2af1    |
| P-STAT1 | 55399935 | 55400377 | 1,01 | ENSRNOG00000012237 | Q5WQV5_RA1 |
| P-STAT1 | 55533982 | 55534408 | 2,03 | ENSRNOG00000012470 | Zc3h12c    |
| P-STAT1 | 57176875 | 57177204 | 0,92 | ENSRNOG00000009008 | Rab39      |
| P-STAT1 | 57227952 | 57228286 | 0,97 | ENSRNOG00000009014 | Slc35f2    |
| P-STAT1 | 58290307 | 58290872 | 1,15 | ENSRNOG00000012803 | WDR61_RAT  |
| P-STAT1 | 58313637 | 58314017 | 1,38 | ENSRNOG00000023633 | Crabp1     |
| P-STAT1 | 58479897 | 58480350 | 0,88 | ENSRNOG00000013419 | Agphd1     |
| P-STAT1 | 58506015 | 58506479 | 1,06 | ENSRNOG00000013493 | Psma4      |
| P-STAT1 | 58535019 | 58535457 | 1,24 | ENSRNOG00000013610 | Chrna5     |
| P-STAT1 | 58536167 | 58536606 | 0,88 | ENSRNOG00000013610 | Chrna5     |
| P-STAT1 | 58538470 | 58539027 | 1,01 | ENSRNOG00000013610 | Chrna5     |
| P-STAT1 | 59689040 | 59689274 | 1,43 | ENSRNOG00000029395 | RGD1562839 |
| P-STAT1 | 59689040 | 59689274 | 1,43 | ENSRNOG00000016413 | Pstpip1    |
| P-STAT1 | 59692171 | 59692711 | 1,24 | ENSRNOG00000016413 | Pstpip1    |
| P-STAT1 | 60011026 | 60011377 | 0,97 | ENSRNOG00000016905 | Hmg20a     |
| P-STAT1 | 60017367 | 60017935 | 0,92 | ENSRNOG00000042519 | RGD1312026 |
| P-STAT1 | 60609151 | 60609484 | 1,29 | ENSRNOG00000017208 | Cspg4      |
| P-STAT1 | 60908828 | 60909093 | 1,61 | ENSRNOG00000018577 | Neil1      |
| P-STAT1 | 61006863 | 61007219 | 1,61 | ENSRNOG00000018689 | RGD1305464 |
| P-STAT1 | 61362094 | 61362618 | 1,84 | ENSRNOG00000019317 | Cplx3      |
| P-STAT1 | 61385257 | 61385794 | 0,88 | ENSRNOG00000019374 | Csk        |
| P-STAT1 | 61686327 | 61686833 | 0,97 | ENSRNOG00000007442 | Ubl7       |
| P-STAT1 | 61794772 | 61795048 | 0,83 | ENSRNOG00000008074 | Cyp11a1    |
| P-STAT1 | 62165633 | 62166271 | 0,97 | ENSRNOG00000008737 | Tbc1d21    |
| P-STAT1 | 62388859 | 62389408 | 0,97 | ENSRNOG00000009029 | Nptn       |
| P-STAT1 | 62556790 | 62557250 | 0,88 | ENSRNOG00000009332 | RGD1311874 |
| P-STAT1 | 63117946 | 63118602 | 1,06 | ENSRNOG00000026178 | Adpgk      |
| P-STAT1 | 63358961 | 63359590 | 1,38 | ENSRNOG00000010252 | Hexa       |
| P-STAT1 | 64633372 | 64633821 | 1,29 | ENSRNOG00000012015 | Lrrc49     |
| P-STAT1 | 66168688 | 66169822 | 1,15 | ENSRNOG00000014164 | Paqr5      |
| P-STAT1 | 66964074 | 66965340 | 1,34 | ENSRNOG00000007077 | Fem1b      |
| P-STAT1 | 67004914 | 67005243 | 1,43 | ENSRNOG00000038202 | Calml4     |
| P-STAT1 | 67565373 | 67566241 | 0,88 | ENSRNOG00000008340 | RGD1309779 |
| P-STAT1 | 68543673 | 68544237 | 1,29 | ENSRNOG00000010537 | Dis3l      |
| P-STAT1 | 69207377 | 69208226 | 1,43 | ENSRNOG00000026904 | NCKX1_RAT  |
| P-STAT1 | 69210607 | 69211142 | 0,92 | ENSRNOG00000026904 | NCKX1_RAT  |
| P-STAT1 | 69215362 | 69216174 | 1,01 | ENSRNOG00000012469 | RGD1359616 |
| P-STAT1 | 69267611 | 69268045 | 1,01 | ENSRNOG00000030232 | Ptplad1    |
| P-STAT1 | 69355477 | 69355946 | 0,92 | ENSRNOG00000033496 | Nope       |
| P-STAT1 | 69645392 | 69645737 | 1,2  | ENSRNOG00000014383 | RGD1311093 |
| P-STAT1 | 69645392 | 69645737 | 1,2  | ENSRNOG00000032339 | Rasl12     |
| P-STAT1 | 69708851 | 69709282 | 1,34 | ENSRNOG00000015019 | SPG21_RAT  |
| P-STAT1 | 70896049 | 70896365 | 1,24 | ENSRNOG00000017714 | Usp3       |
| P-STAT1 | 70897924 | 70898548 | 1,66 | ENSRNOG00000017714 | Usp3       |
| P-STAT1 | 71018076 | 71018750 | 1,24 | ENSRNOG00000017766 | Car12      |
| P-STAT1 | 71144763 | 71145443 | 0,97 | ENSRNOG00000027295 | Aph1b      |

|         |           |           |      |                     |            |
|---------|-----------|-----------|------|---------------------|------------|
| P-STAT1 | 71360327  | 71360677  | 0,92 | ENSRNOG00000018184  | Tpm1_v9    |
| P-STAT1 | 73895790  | 73896639  | 1,24 | ENSRNOG00000010362  | Anxa2      |
| P-STAT1 | 74474280  | 74474790  | 1,2  | ENSRNOG00000011086  | Gcnt3      |
| P-STAT1 | 74906534  | 74907762  | 0,83 | ENSRNOG00000012678  | Ccnb2      |
| P-STAT1 | 75690117  | 75690447  | 1,06 | ENSRNOG00000016042  | Aldh1a2    |
| P-STAT1 | 76243375  | 76243622  | 0,92 | ENSRNOG00000017439  | Cgnl1      |
| P-STAT1 | 77013542  | 77013906  | 1,47 | ENSRNOG00000006009  | Mns1       |
| P-STAT1 | 77432059  | 77432388  | 1,71 | ENSRNOG00000023957  | Prtg       |
| P-STAT1 | 77863377  | 77863801  | 0,88 | ENSRNOG00000023460  | Ecat1      |
| P-STAT1 | 78705121  | 78705650  | 2,26 | ENSRNOG00000007694  | UN13C_RAT  |
| P-STAT1 | 80171146  | 80171491  | 1,01 | ENSRNOG00000009308  | Bcl2l10    |
| P-STAT1 | 81198552  | 81198904  | 0,97 | ENSRNOG00000011251  | Hctrtr2    |
| P-STAT1 | 81462729  | 81463493  | 0,92 | ENSRNOG00000011925  | Fam83b     |
| P-STAT1 | 82498596  | 82499042  | 0,92 | ENSRNOG00000005970  | Lrrc1      |
| P-STAT1 | 82721923  | 82722351  | 1,11 | ENSRNOG00000006302  | Gclc       |
| P-STAT1 | 83084648  | 83085297  | 0,92 | ENSRNOG00000008214  | Fbxo9      |
| P-STAT1 | 83084648  | 83085297  | 0,92 | ENSRNOG00000008691  | Ick        |
| P-STAT1 | 83161311  | 83161865  | 0,92 | ENSRNOG00000030449  | Gsta4      |
| P-STAT1 | 83551862  | 83552411  | 1,38 | ENSRNOG00000009330  | Slc17a5    |
| P-STAT1 | 83863619  | 83864145  | 0,92 | ENSRNOG00000031132  | LOC367117  |
| P-STAT1 | 84817937  | 84818486  | 0,97 | ENSRNOG000000042903 | Cox7a2     |
| P-STAT1 | 84903219  | 84903454  | 0,83 | ENSRNOG00000011521  | Filip1     |
| P-STAT1 | 85522340  | 85522889  | 0,97 | ENSRNOG00000012479  | Impg1      |
| P-STAT1 | 86703079  | 86704435  | 0,88 | ENSRNOG00000013042  | Htr1b      |
| P-STAT1 | 88998448  | 88998829  | 1,01 | ENSRNOG00000009928  | Bckdhb     |
| P-STAT1 | 91073610  | 91074075  | 0,88 | ENSRNOG00000010694  | Tpbg       |
| P-STAT1 | 91829469  | 91829919  | 1,52 | ENSRNOG00000009515  | Pgm3       |
| P-STAT1 | 92148734  | 92149290  | 0,88 | ENSRNOG00000023861  | AP180_RAT  |
| P-STAT1 | 94042328  | 94042667  | 1,11 | ENSRNOG00000013229  | Mthfs      |
| P-STAT1 | 99592114  | 99592558  | 1,11 | ENSRNOG00000008519  | RGD1309079 |
| P-STAT1 | 101441562 | 101441988 | 1,01 | ENSRNOG00000011501  | Atp1b3     |
| P-STAT1 | 103606272 | 103606616 | 0,88 | ENSRNOG00000013794  | Rbp1       |
| P-STAT1 | 105521975 | 105522699 | 0,97 | ENSRNOG00000015389  | Stag1      |
| P-STAT1 | 106000027 | 106000286 | 0,97 | ENSRNOG00000015869  | Pccb       |
| P-STAT1 | 107330304 | 107330751 | 1,66 | ENSRNOG00000007865  | Ephb1      |
| P-STAT1 | 107470710 | 107471149 | 0,92 | ENSRNOG00000008210  | Ky         |
| P-STAT1 | 110500851 | 110501202 | 1,29 | ENSRNOG000000042432 | Nek11      |
| P-STAT1 | 110500851 | 110501202 | 1,29 | ENSRNOG00000013059  | Aste1      |
| P-STAT1 | 110742430 | 110742803 | 0,97 | ENSRNOG00000013669  | PI3R4_RAT  |
| P-STAT1 | 111588053 | 111588321 | 1,43 | ENSRNOG00000012073  | Abhd14b    |
| P-STAT1 | 111593095 | 111593524 | 0,88 | ENSRNOG00000012406  | Pcbp4      |
| P-STAT1 | 111593095 | 111593524 | 0,88 | ENSRNOG00000012073  | Abhd14b    |
| P-STAT1 | 111593095 | 111593524 | 0,88 | ENSRNOG00000011936  | ABHEA_RAT  |
| P-STAT1 | 111636175 | 111636521 | 1,34 | ENSRNOG00000037289  | Iqcf1      |
| P-STAT1 | 111653017 | 111653651 | 1,38 | ENSRNOG00000013164  | Iqcf5      |
| P-STAT1 | 111817383 | 111818032 | 1,01 | ENSRNOG000000042065 | RGD1562645 |
| P-STAT1 | 112778206 | 112778574 | 1,34 | ENSRNOG00000021899  | Tmem115    |
| P-STAT1 | 112791792 | 112792148 | 0,92 | ENSRNOG00000021602  | Zmynd10    |
| P-STAT1 | 112791792 | 112792148 | 0,92 | ENSRNOG00000021887  | Cyb561d2   |

|         |           |           |      |                    |             |
|---------|-----------|-----------|------|--------------------|-------------|
| P-STAT1 | 112809940 | 112810300 | 1,15 | ENSRNOG00000021528 | Tusc2       |
| P-STAT1 | 112820804 | 112821137 | 1,47 | ENSRNOG00000015858 | Hyal1       |
| P-STAT1 | 112825533 | 112826190 | 1,11 | ENSRNOG00000016093 | Hyal3       |
| P-STAT1 | 112830469 | 112830703 | 0,88 | ENSRNOG00000016150 | Ifrd2       |
| P-STAT1 | 112932373 | 112932709 | 0,92 | ENSRNOG00000017589 | Gnat1       |
| P-STAT1 | 112965459 | 112965996 | 1,01 | ENSRNOG00000017704 | Sema3f      |
| P-STAT1 | 113128884 | 113129821 | 0,83 | ENSRNOG00000018333 | Rbm6        |
| P-STAT1 | 113245154 | 113245698 | 1,01 | ENSRNOG00000029195 | Uba7        |
| P-STAT1 | 113880518 | 113881152 | 0,97 | ENSRNOG00000034005 | Celsr3      |
| P-STAT1 | 114001689 | 114002033 | 2,03 | ENSRNOG00000020655 | Ucn2        |
| P-STAT1 | 114010365 | 114010813 | 1,2  | ENSRNOG00000020656 | Pfkfb4      |
| P-STAT1 | 114065839 | 114066289 | 1,11 | ENSRNOG00000020667 | MGC94600    |
| P-STAT1 | 114190589 | 114191039 | 1,75 | ENSRNOG00000037199 | Spink8      |
| P-STAT1 | 114912132 | 114912381 | 0,88 | ENSRNOG00000020915 | Setd2       |
| P-STAT1 | 114912641 | 114912882 | 0,83 | ENSRNOG00000020915 | Setd2       |
| P-STAT1 | 115173193 | 115173822 | 0,88 | ENSRNOG00000031971 | Tessp2      |
| P-STAT1 | 115394361 | 115395027 | 1,06 | ENSRNOG00000037167 | Rtp3        |
| P-STAT1 | 115455096 | 115457076 | 1,47 | ENSRNOG00000033234 | Ccr12       |
| P-STAT1 | 115510145 | 115510711 | 1,01 | ENSRNOG00000021047 | Lrrfip2     |
| P-STAT1 | 118350680 | 118351041 | 1,11 | ENSRNOG00000008981 | RGD1561176  |
| P-STAT1 | 118790705 | 118791160 | 1,2  | ENSRNOG00000010196 | Glb1        |
| P-STAT1 | 119060861 | 119061330 | 1,11 | ENSRNOG00000010334 | Cnot10      |
| P-STAT1 | 122957472 | 122957830 | 0,92 | ENSRNOG00000010096 | Azi2        |
| P-STAT1 | 123048050 | 123048396 | 1,52 | ENSRNOG00000010149 | Cmc1        |
| P-STAT1 | 124546155 | 124546584 | 1,94 | ENSRNOG00000015049 | Scn5a       |
| P-STAT1 | 124693447 | 124693811 | 1,57 | ENSRNOG00000032473 | SCNAA_RAT   |
| P-STAT1 | 125049990 | 125050839 | 1,52 | ENSRNOG00000018509 | Cx3cr1      |
| P-STAT1 | 126369794 | 126370336 | 1,06 | ENSRNOG00000019262 | RGD1307844  |
| P-STAT1 | 126994643 | 126995118 | 1,29 | ENSRNOG00000037078 | LOC367191   |
| P-STAT1 | 127028516 | 127028850 | 0,97 | ENSRNOG00000044749 | 7SK         |
| P-STAT1 | 128245937 | 128246403 | 1,01 | ENSRNOG00000004837 | Limd1       |
| P-STAT1 | 128249428 | 128249770 | 1,57 | ENSRNOG00000004837 | Limd1       |
| P-STAT1 | 128299760 | 128300128 | 1,01 | ENSRNOG00000005149 | Sacm1l      |
| P-STAT1 | 128455005 | 128455469 | 0,88 | ENSRNOG00000006010 | Slc6a20     |
| P-STAT1 | 128891242 | 128891611 | 1,15 | ENSRNOG00000006755 | Ccr2<i><sup |
| P-STAT1 | 128892148 | 128892987 | 1,2  | ENSRNOG00000006755 | Ccr2<i><sup |
| P-STAT1 | 131238    | 131689    | 0,88 | ENSRNOG00000010597 | Slc5a7      |
| P-STAT1 | 4108609   | 4109293   | 1,43 | ENSRNOG00000010637 | Tbc1d5      |
| P-STAT1 | 7144552   | 7145252   | 0,97 | ENSRNOG00000011803 | Lrnf2       |
| P-STAT1 | 8186013   | 8186555   | 1,15 | ENSRNOG00000022859 | Trem1       |
| P-STAT1 | 9067665   | 9068028   | 1,11 | ENSRNOG00000015623 | Guca1b      |
| P-STAT1 | 9346189   | 9346641   | 1,2  | ENSRNOG00000016229 | RGD1305680  |
| P-STAT1 | 10013241  | 10013595  | 0,92 | ENSRNOG00000018057 | Mrpl2       |
| P-STAT1 | 10400904  | 10401137  | 0,88 | ENSRNOG00000019474 | Rsph9       |
| P-STAT1 | 10436596  | 10437084  | 0,88 | ENSRNOG00000019511 | Mrps18a     |
| P-STAT1 | 11042989  | 11043623  | 1,61 | ENSRNOG00000019900 | Dsm-1       |
| P-STAT1 | 11044069  | 11044618  | 1,11 | ENSRNOG00000019900 | Dsm-1       |
| P-STAT1 | 12582955  | 12583409  | 0,88 | ENSRNOG00000010232 | Enpp5       |
| P-STAT1 | 12999050  | 12999694  | 0,97 | ENSRNOG00000010592 | Slc25a27    |

|         |          |          |      |                    |            |
|---------|----------|----------|------|--------------------|------------|
| P-STAT1 | 15855636 | 15856180 | 0,88 | ENSRNOG00000030670 | LOC688536  |
| P-STAT1 | 15893092 | 15893441 | 0,97 | ENSRNOG00000034100 | LOC688459  |
| P-STAT1 | 15894593 | 15895330 | 0,92 | ENSRNOG00000034100 | LOC688459  |
| P-STAT1 | 16118680 | 16119224 | 0,88 | ENSRNOG00000034235 | LOC688536  |
| P-STAT1 | 16159111 | 16159640 | 1,01 | ENSRNOG00000042575 | LOC688459  |
| P-STAT1 | 17121507 | 17122079 | 0,88 | ENSRNOG00000039640 | Defb17     |
| P-STAT1 | 17932885 | 17933372 | 1,06 | ENSRNOG00000011642 | Tcfap2d    |
| P-STAT1 | 19522217 | 19522553 | 1,66 | ENSRNOG00000012509 | Il17f      |
| P-STAT1 | 20016219 | 20016748 | 0,92 | ENSRNOG00000029711 | GSTA5_RAT  |
| P-STAT1 | 29628651 | 29629083 | 0,92 | ENSRNOG00000011771 | Ptp4a1     |
| P-STAT1 | 32466264 | 32466817 | 0,92 | ENSRNOG00000012629 | Rab23      |
| P-STAT1 | 32493207 | 32493566 | 1,66 | ENSRNOG00000012709 | Bag2       |
| P-STAT1 | 33177250 | 33178176 | 0,83 | ENSRNOG00000013285 | Imp4       |
| P-STAT1 | 35304541 | 35305227 | 1,43 | ENSRNOG00000015417 | RGD1309220 |
| P-STAT1 | 35692706 | 35694140 | 0,97 | ENSRNOG00000016995 | Zap70      |
| P-STAT1 | 36376211 | 36376758 | 0,88 | ENSRNOG00000018102 | RGD1565095 |
| P-STAT1 | 36376211 | 36376758 | 0,88 | ENSRNOG00000018128 | Unc50      |
| P-STAT1 | 36812493 | 36813047 | 1,24 | ENSRNOG00000018376 | Tsga10     |
| P-STAT1 | 36842780 | 36843429 | 0,92 | ENSRNOG00000018467 | Mitd1      |
| P-STAT1 | 36897303 | 36897678 | 0,97 | ENSRNOG00000018534 | Lyg1       |
| P-STAT1 | 37044600 | 37045387 | 1,15 | ENSRNOG00000018623 | Rev1       |
| P-STAT1 | 37883248 | 37883792 | 0,97 | ENSRNOG00000012815 | Chst10     |
| P-STAT1 | 37883248 | 37883792 | 0,97 | ENSRNOG00000034482 | U6         |
| P-STAT1 | 38435151 | 38435401 | 1,29 | ENSRNOG00000013508 | Rpl31      |
| P-STAT1 | 39672446 | 39672921 | 1,48 | ENSRNOG00000015062 | Q70SJ5_RAT |
| P-STAT1 | 39939925 | 39940485 | 0,92 | ENSRNOG00000023129 | Mfsd9      |
| P-STAT1 | 42351301 | 42351940 | 0,88 | ENSRNOG00000016866 | Fhl2       |
| P-STAT1 | 42646334 | 42646822 | 0,97 | ENSRNOG00000017155 | Nck2       |
| P-STAT1 | 45868407 | 45868958 | 0,88 | ENSRNOG00000012924 | Tmem194b   |
| P-STAT1 | 47384400 | 47384764 | 1,48 | ENSRNOG00000025895 | Sdpr       |
| P-STAT1 | 47813020 | 47813374 | 1,43 | ENSRNOG00000016623 | Tmeff2     |
| P-STAT1 | 52841097 | 52841528 | 1,06 | ENSRNOG00000013257 | Hecw2      |
| P-STAT1 | 56692759 | 56693033 | 1,34 | ENSRNOG00000015354 | ADO_RAT    |
| P-STAT1 | 57307901 | 57308330 | 1,06 | ENSRNOG00000012473 | C0H5Y5_RAT |
| P-STAT1 | 57471001 | 57471651 | 1,24 | ENSRNOG00000024917 | Als2cr12   |
| P-STAT1 | 57739465 | 57740433 | 1,38 | ENSRNOG00000010486 | Mpp4       |
| P-STAT1 | 58472789 | 58473305 | 0,92 | ENSRNOG00000019107 | Q7TPL2_RAT |
| P-STAT1 | 58472789 | 58473305 | 0,92 | ENSRNOG00000022066 | Fam117b    |
| P-STAT1 | 59167344 | 59167968 | 1,01 | ENSRNOG00000014722 | Raph1      |
| P-STAT1 | 59340266 | 59340805 | 0,92 | ENSRNOG00000010283 | Cd28       |
| P-STAT1 | 59342835 | 59343174 | 0,92 | ENSRNOG00000010283 | Cd28       |
| P-STAT1 | 62738094 | 62738618 | 1,06 | ENSRNOG00000012961 | Klf7       |
| P-STAT1 | 63168127 | 63168871 | 0,97 | ENSRNOG00000013412 | Creb1      |
| P-STAT1 | 63703984 | 63704313 | 1,29 | ENSRNOG00000014790 | Cryge      |
| P-STAT1 | 63940321 | 63940762 | 0,92 | ENSRNOG00000015259 | Pth2r      |
| P-STAT1 | 71444178 | 71444544 | 1,61 | ENSRNOG00000015809 | Pecr       |
| P-STAT1 | 71444178 | 71444544 | 1,61 | ENSRNOG00000016091 | Tmem169    |
| P-STAT1 | 71837100 | 71837434 | 0,92 | ENSRNOG00000023385 | Rpl37a     |
| P-STAT1 | 72397614 | 72397963 | 1,43 | ENSRNOG00000017611 | Tnp1       |

|         |           |           |      |                    |            |
|---------|-----------|-----------|------|--------------------|------------|
| P-STAT1 | 73727270  | 73727821  | 1,43 | ENSRNOG00000015295 | Ctdsp1     |
| P-STAT1 | 74412414  | 74412653  | 0,92 | ENSRNOG00000018162 | Nhej1      |
| P-STAT1 | 74450242  | 74450784  | 0,88 | ENSRNOG00000018639 | Zfand2b    |
| P-STAT1 | 74470397  | 74470761  | 1,66 | ENSRNOG00000019052 | Ankzf1     |
| P-STAT1 | 74488276  | 74488810  | 1,66 | ENSRNOG00000019294 | Stk16      |
| P-STAT1 | 74516810  | 74517542  | 0,88 | ENSRNOG00000019506 | LOC689593  |
| P-STAT1 | 78770242  | 78770824  | 1,01 | ENSRNOG00000015055 | Scg2       |
| P-STAT1 | 81640002  | 81640383  | 0,88 | ENSRNOG00000014597 | Irs1       |
| P-STAT1 | 81641658  | 81642001  | 1,06 | ENSRNOG00000014597 | Irs1       |
| P-STAT1 | 81685533  | 81685974  | 1,01 | ENSRNOG00000014620 | Rhbdd1     |
| P-STAT1 | 82044454  | 82045382  | 1,01 | ENSRNOG00000015428 | RGD1310230 |
| P-STAT1 | 83428070  | 83428727  | 0,83 | ENSRNOG00000029735 | Pid1       |
| P-STAT1 | 84371857  | 84372394  | 1,24 | ENSRNOG00000022769 | Sp100      |
| P-STAT1 | 85124936  | 85125404  | 0,97 | ENSRNOG00000018273 | Ncl        |
| P-STAT1 | 85151838  | 85152707  | 1,11 | ENSRNOG00000018521 | Nmur1      |
| P-STAT1 | 85350051  | 85350466  | 1,01 | ENSRNOG00000018723 | Cops7b     |
| P-STAT1 | 85897673  | 85898222  | 1,71 | ENSRNOG00000030020 | Alpi       |
| P-STAT1 | 85923954  | 85924403  | 0,88 | ENSRNOG00000019375 | Akp3       |
| P-STAT1 | 85948939  | 85949298  | 0,92 | ENSRNOG00000019447 | Ecel1      |
| P-STAT1 | 85984600  | 85985029  | 0,97 | ENSRNOG00000029865 | RGD1563955 |
| P-STAT1 | 85992942  | 85993509  | 0,97 | ENSRNOG00000019527 | Chrnd      |
| P-STAT1 | 86011187  | 86011546  | 1,01 | ENSRNOG00000019602 | Chrng      |
| P-STAT1 | 86073803  | 86074402  | 0,88 | ENSRNOG00000015596 | Efhd1      |
| P-STAT1 | 86216700  | 86217049  | 0,92 | ENSRNOG00000016057 | Kcnj13     |
| P-STAT1 | 86329144  | 86329995  | 1,06 | ENSRNOG00000016653 | Ngef       |
| P-STAT1 | 86574387  | 86574846  | 2,35 | ENSRNOG00000017020 | Inpp5d     |
| P-STAT1 | 88708153  | 88708802  | 0,88 | ENSRNOG00000019476 | Centg2     |
| P-STAT1 | 89126189  | 89126439  | 1,48 | ENSRNOG00000019557 | Asb18      |
| P-STAT1 | 89800599  | 89800858  | 0,92 | ENSRNOG00000019635 | Cops8      |
| P-STAT1 | 90643103  | 90643777  | 0,83 | ENSRNOG00000020194 | Hes6       |
| P-STAT1 | 91697495  | 91697962  | 1,11 | ENSRNOG00000033406 | Olr1343    |
| P-STAT1 | 91790490  | 91791024  | 0,88 | ENSRNOG00000016546 | Olr1349    |
| P-STAT1 | 91794958  | 91795505  | 1,2  | ENSRNOG00000030424 | Olr1350    |
| P-STAT1 | 91805833  | 91806387  | 1,01 | ENSRNOG00000032545 | Olr1351    |
| P-STAT1 | 91820394  | 91821463  | 0,97 | ENSRNOG00000037404 | Olr1352    |
| P-STAT1 | 91862545  | 91862877  | 0,88 | ENSRNOG00000037402 | Myeov2     |
| P-STAT1 | 91864442  | 91864876  | 1,66 | ENSRNOG00000037402 | Myeov2     |
| P-STAT1 | 92576677  | 92577040  | 1,06 | ENSRNOG00000037376 | Mterfd2    |
| P-STAT1 | 92653686  | 92654335  | 0,88 | ENSRNOG00000023427 | Ano7       |
| P-STAT1 | 92753609  | 92753984  | 1,15 | ENSRNOG00000017952 | 02-wrz     |
| P-STAT1 | 93187326  | 93187701  | 0,92 | ENSRNOG00000019043 | Pdcd1      |
| P-STAT1 | 94816003  | 94816271  | 1,11 | ENSRNOG00000043322 | St8sia4    |
| P-STAT1 | 94818047  | 94818396  | 1,29 | ENSRNOG00000043322 | St8sia4    |
| P-STAT1 | 94922085  | 94923439  | 0,83 | ENSRNOG00000019128 | LOC501189  |
| P-STAT1 | 96628584  | 96629238  | 0,88 | ENSRNOG00000031146 | LOC367321  |
| P-STAT1 | 103298669 | 103299023 | 1,01 | ENSRNOG00000015439 | Man2a1     |
| P-STAT1 | 104652795 | 104653141 | 0,92 | ENSRNOG00000013461 | Ralbp1     |
| P-STAT1 | 106851775 | 106852256 | 1,15 | ENSRNOG00000017237 | Lama1      |
| P-STAT1 | 108510174 | 108510625 | 0,92 | ENSRNOG00000016719 | Zfp161     |

|         |           |           |      |                     |            |
|---------|-----------|-----------|------|---------------------|------------|
| P-STAT1 | 110055912 | 110056167 | 1,24 | ENSRNOG00000015906  | Tgif1      |
| P-STAT1 | 112515797 | 112516149 | 0,88 | ENSRNOG00000037227  | Yes1       |
| P-STAT1 | 6908902   | 6909255   | 1,54 | ENSRNOG00000000164  | Lamp2      |
| P-STAT1 | 7495708   | 7496176   | 0,96 | ENSRNOG000000007526 | Rhox9      |
| P-STAT1 | 7673653   | 7674357   | 0,91 | ENSRNOG000000027994 | Rhox4g     |
| P-STAT1 | 7674843   | 7675887   | 0,72 | ENSRNOG000000027994 | Rhox4g     |
| P-STAT1 | 7709389   | 7709738   | 0,91 | ENSRNOG000000040008 | RGD1560927 |
| P-STAT1 | 7723702   | 7724144   | 0,96 | ENSRNOG000000040005 | Ndufa1     |
| P-STAT1 | 12046804  | 12047376  | 1,4  | ENSRNOG000000005687 | Slc6a14    |
| P-STAT1 | 12629155  | 12629584  | 1,25 | ENSRNOG000000009893 | Uxt        |
| P-STAT1 | 12910718  | 12911002  | 0,87 | ENSRNOG000000009049 | Usp11      |
| P-STAT1 | 12918372  | 12919031  | 1,11 | ENSRNOG000000008578 | CDK16_RAT  |
| P-STAT1 | 12920025  | 12920369  | 1,73 | ENSRNOG000000008578 | CDK16_RAT  |
| P-STAT1 | 12988326  | 12988684  | 0,96 | ENSRNOG000000008329 | Ndufb11    |
| P-STAT1 | 12988326  | 12988684  | 0,96 | ENSRNOG000000035860 | U2         |
| P-STAT1 | 13336551  | 13337025  | 1,11 | ENSRNOG000000025428 | Rp2        |
| P-STAT1 | 21126334  | 21127103  | 1,2  | ENSRNOG000000039759 | Gpr34      |
| P-STAT1 | 21512767  | 21513016  | 0,91 | ENSRNOG000000023383 | Ddx3x      |
| P-STAT1 | 25478788  | 25479757  | 1,25 | ENSRNOG000000003611 | Dynlt3     |
| P-STAT1 | 25546931  | 25547365  | 0,91 | ENSRNOG000000003622 | Cybb       |
| P-STAT1 | 25991234  | 25991568  | 1,06 | ENSRNOG000000028887 | LOC691895  |
| P-STAT1 | 26377500  | 26378578  | 1,35 | ENSRNOG000000005387 | Rbm3       |
| P-STAT1 | 26604525  | 26605259  | 1,2  | ENSRNOG000000042470 | LOC679682  |
| P-STAT1 | 26617164  | 26617609  | 1,35 | ENSRNOG000000007112 | Pcsk1n     |
| P-STAT1 | 26652076  | 26652503  | 1,3  | ENSRNOG000000024801 | Slc35a2    |
| P-STAT1 | 26655088  | 26655432  | 1,2  | ENSRNOG000000024801 | Slc35a2    |
| P-STAT1 | 26709463  | 26710002  | 1,16 | ENSRNOG000000039544 | Kcnd1      |
| P-STAT1 | 29010167  | 29010623  | 1,06 | ENSRNOG000000002984 | Bmp15      |
| P-STAT1 | 34192913  | 34193462  | 0,91 | ENSRNOG000000005753 | Alg13      |
| P-STAT1 | 35142349  | 35142693  | 1,93 | ENSRNOG000000004330 | Chrdl1     |
| P-STAT1 | 37610784  | 37611228  | 1,16 | ENSRNOG000000031286 | Spin2a     |
| P-STAT1 | 38585752  | 38586201  | 1,59 | ENSRNOG000000003178 | Mageh1     |
| P-STAT1 | 41503209  | 41503657  | 1,01 | ENSRNOG000000003081 | Ribc1      |
| P-STAT1 | 41503209  | 41503657  | 1,01 | ENSRNOG000000003139 | SMC1A_RAT  |
| P-STAT1 | 41504313  | 41504667  | 1,2  | ENSRNOG000000003139 | SMC1A_RAT  |
| P-STAT1 | 41504313  | 41504667  | 1,2  | ENSRNOG000000003081 | Ribc1      |
| P-STAT1 | 42479188  | 42479544  | 0,96 | ENSRNOG000000003543 | Gpr143     |
| P-STAT1 | 46329817  | 46330181  | 1,88 | ENSRNOG000000004016 | Msl3l1     |
| P-STAT1 | 47331060  | 47331439  | 0,96 | ENSRNOG000000004249 | Tlr7       |
| P-STAT1 | 48567060  | 48567412  | 0,91 | ENSRNOG000000004275 | Egfl6      |
| P-STAT1 | 48664197  | 48664458  | 1,35 | ENSRNOG000000030443 | Rab9a      |
| P-STAT1 | 50814347  | 50814906  | 1,11 | ENSRNOG000000003554 | Piga       |
| P-STAT1 | 50973805  | 50974273  | 1,73 | ENSRNOG000000003674 | Pir        |
| P-STAT1 | 50973805  | 50974273  | 1,73 | ENSRNOG000000044075 | U6         |
| P-STAT1 | 51150219  | 51150567  | 1,64 | ENSRNOG000000003960 | Tmem27     |
| P-STAT1 | 51359358  | 51359715  | 1,83 | ENSRNOG000000038686 | Ap1s2      |
| P-STAT1 | 52690990  | 52691354  | 1,06 | ENSRNOG000000005157 | Rbbp7      |
| P-STAT1 | 55356872  | 55357501  | 2,02 | ENSRNOG000000027331 | PPE1_RAT   |
| P-STAT1 | 55657783  | 55658225  | 1,06 | ENSRNOG000000032472 | Gpr64      |

|         |           |           |      |                     |            |
|---------|-----------|-----------|------|---------------------|------------|
| P-STAT1 | 58705187  | 58705653  | 0,91 | ENSRNOG00000007644  | Mbtps2     |
| P-STAT1 | 61630698  | 61630966  | 1,35 | ENSRNOG00000003809  | Sat1       |
| P-STAT1 | 61632987  | 61633670  | 0,91 | ENSRNOG00000003809  | Sat1       |
| P-STAT1 | 63403888  | 63404247  | 1,44 | ENSRNOG00000026351  | LOC680489  |
| P-STAT1 | 72492858  | 72493510  | 1,16 | ENSRNOG00000034116  | Gk         |
| P-STAT1 | 79135014  | 79135368  | 1,16 | ENSRNOG00000043508  | Magebl1    |
| P-STAT1 | 81174320  | 81174875  | 1,44 | ENSRNOG00000012513  | Pdk3       |
| P-STAT1 | 81625943  | 81626401  | 1,06 | ENSRNOG00000006515  | Klhl15     |
| P-STAT1 | 85948389  | 85948933  | 1,3  | ENSRNOG00000005639  | Ar         |
| P-STAT1 | 87088548  | 87089515  | 2,26 | ENSRNOG00000033883  | Stard8     |
| P-STAT1 | 87159400  | 87159769  | 1,16 | ENSRNOG00000006877  | Efnb1      |
| P-STAT1 | 88488995  | 88489541  | 1,3  | ENSRNOG00000026267  | Igfbp1     |
| P-STAT1 | 88512172  | 88512816  | 1,16 | ENSRNOG00000038046  | LOC678749  |
| P-STAT1 | 88570354  | 88570713  | 1,35 | ENSRNOG00000026231  | Awat1      |
| P-STAT1 | 88626287  | 88626947  | 0,91 | ENSRNOG00000002838  | Pdzd11     |
| P-STAT1 | 88741152  | 88741501  | 1,2  | ENSRNOG00000002800  | Gdpd2      |
| P-STAT1 | 88743853  | 88744202  | 0,91 | ENSRNOG00000002800  | Gdpd2      |
| P-STAT1 | 88777055  | 88777517  | 1,06 | ENSRNOG00000002767  | Dlg3       |
| P-STAT1 | 89498038  | 89498287  | 1,4  | ENSRNOG00000003689  | Nono       |
| P-STAT1 | 89520569  | 89521098  | 1,01 | ENSRNOG00000003596  | Itgb1bp2   |
| P-STAT1 | 89718290  | 89718662  | 1,06 | ENSRNOG00000003359  | Ogt        |
| P-STAT1 | 90251891  | 90252960  | 0,72 | ENSRNOG00000003201  | Rps4x      |
| P-STAT1 | 90545623  | 90546874  | 1,49 | ENSRNOG00000003122  | Hdac8      |
| P-STAT1 | 90800489  | 90801738  | 1,93 | ENSRNOG000000037923 | Dmrtc1c    |
| P-STAT1 | 91826884  | 91827337  | 1,01 | ENSRNOG00000002832  | Slc16a2    |
| P-STAT1 | 91984498  | 91984832  | 1,44 | ENSRNOG00000002824  | Rnf12      |
| P-STAT1 | 91989354  | 91989578  | 0,96 | ENSRNOG00000002824  | Rnf12      |
| P-STAT1 | 92699778  | 92700152  | 1,25 | ENSRNOG00000002751  | Zdhhc15    |
| P-STAT1 | 93150055  | 93150837  | 1,35 | ENSRNOG00000002662  | RGD1562502 |
| P-STAT1 | 94051354  | 94051711  | 1,54 | ENSRNOG00000002550  | Atrx       |
| P-STAT1 | 94804268  | 94804613  | 1,25 | ENSRNOG00000037845  | Cysltr1    |
| P-STAT1 | 94805176  | 94805521  | 0,96 | ENSRNOG00000037845  | Cysltr1    |
| P-STAT1 | 121439353 | 121439692 | 1,44 | ENSRNOG00000003786  | Tspan6     |
| P-STAT1 | 121624507 | 121625054 | 1,06 | ENSRNOG00000026961  | Xkrx       |
| P-STAT1 | 121773333 | 121774068 | 1,68 | ENSRNOG00000001506  | Tmem35     |
| P-STAT1 | 121786634 | 121786983 | 1,25 | ENSRNOG00000033335  | Cenpi      |
| P-STAT1 | 122213489 | 122214048 | 0,87 | ENSRNOG00000037707  | Armxc6     |
| P-STAT1 | 122213489 | 122214048 | 0,87 | ENSRNOG00000025730  | Armxc3     |
| P-STAT1 | 122628890 | 122629631 | 1,3  | ENSRNOG00000037698  | RGD1561307 |
| P-STAT1 | 123323066 | 123323315 | 1,01 | ENSRNOG00000032729  | Bex2       |
| P-STAT1 | 123533386 | 123534327 | 1,2  | ENSRNOG00000033844  | Bex1       |
| P-STAT1 | 123533386 | 123534327 | 1,2  | ENSRNOG00000037645  | LOC680319  |
| P-STAT1 | 123553488 | 123553890 | 0,91 | ENSRNOG00000034198  | Wbp5       |
| P-STAT1 | 123586642 | 123586996 | 1,83 | ENSRNOG00000028822  | Ngfrap1    |
| P-STAT1 | 128247559 | 128247916 | 0,91 | ENSRNOG00000025166  | Prps1      |
| P-STAT1 | 134397298 | 134397644 | 1,35 | ENSRNOG00000003984  | Apln       |
| P-STAT1 | 134397993 | 134398673 | 1,3  | ENSRNOG00000003984  | Apln       |
| P-STAT1 | 134624665 | 134625109 | 1,3  | ENSRNOG00000005012  | Q5M811_RAT |
| P-STAT1 | 136515605 | 136516134 | 1,01 | ENSRNOG00000029322  | Olr1767    |

|         |           |           |      |                     |            |
|---------|-----------|-----------|------|---------------------|------------|
| P-STAT1 | 136517556 | 136518493 | 1,78 | ENSRNOG00000029322  | Olr1767    |
| P-STAT1 | 137757790 | 137758242 | 1,01 | ENSRNOG00000002529  | LOC302495  |
| P-STAT1 | 138859033 | 138859267 | 1,06 | ENSRNOG000000032629 | MGC114492  |
| P-STAT1 | 139078640 | 139079102 | 0,91 | ENSRNOG00000002413  | Gpc4       |
| P-STAT1 | 140059385 | 140060026 | 1,25 | ENSRNOG00000002379  | Plac1      |
| P-STAT1 | 141315012 | 141315389 | 1,64 | ENSRNOG00000000875  | Fhl1       |
| P-STAT1 | 141684598 | 141685399 | 1,59 | ENSRNOG00000000873  | Brs3       |
| P-STAT1 | 141923524 | 141924081 | 1,06 | ENSRNOG00000000871  | Cd40lg     |
| P-STAT1 | 141925359 | 141925698 | 1,49 | ENSRNOG00000000871  | Cd40lg     |
| P-STAT1 | 142069193 | 142069543 | 0,96 | ENSRNOG00000000869  | Arhgef6    |
| P-STAT1 | 142537095 | 142537454 | 1,06 | ENSRNOG00000027658  | Gpr101     |
| P-STAT1 | 142538815 | 142539376 | 0,91 | ENSRNOG00000027658  | Gpr101     |
| P-STAT1 | 147896604 | 147897058 | 1,25 | ENSRNOG00000026265  | MGC114529  |
| P-STAT1 | 149959042 | 149959493 | 0,91 | ENSRNOG00000023016  | MGC114427  |
| P-STAT1 | 158334123 | 158334557 | 0,96 | ENSRNOG00000016533  | Gabre      |
| P-STAT1 | 159058622 | 159058971 | 1,4  | ENSRNOG00000025999  | Pnma3      |
| P-STAT1 | 159236759 | 159237313 | 1,06 | ENSRNOG00000018419  | Zfp275     |
| P-STAT1 | 159558368 | 159559037 | 1,64 | ENSRNOG00000017923  | Pnck       |
| P-STAT1 | 159611986 | 159613036 | 0,96 | ENSRNOG00000018857  | Abcd1      |
| P-STAT1 | 159838049 | 159838593 | 1,2  | ENSRNOG00000037273  | Arhgap4    |
| P-STAT1 | 160218460 | 160218799 | 1,25 | ENSRNOG00000037253  | Fam3a      |
| P-STAT1 | 160340949 | 160341498 | 1,06 | ENSRNOG00000036551  | SNORA70    |
| P-STAT1 | 160340949 | 160341498 | 1,06 | ENSRNOG00000027149  | Rpl10      |
| P-STAT3 | 5743645   | 5743979   | 1,23 | ENSRNOG00000014290  | Grm1       |
| P-STAT3 | 7617864   | 7618524   | 1,23 | ENSRNOG00000011058  | Utrn       |
| P-STAT3 | 13106993  | 13108048  | 1,06 | ENSRNOG00000012476  | Reps1      |
| P-STAT3 | 20998585  | 20999318  | 1    | ENSRNOG00000013304  | Arg1       |
| P-STAT3 | 21983752  | 21984091  | 1,28 | ENSRNOG00000016089  | Taar6      |
| P-STAT3 | 29296783  | 29297327  | 1,23 | ENSRNOG00000011622  | Echdc1     |
| P-STAT3 | 29770425  | 29770884  | 1,34 | ENSRNOG00000014485  | Pdcd6      |
| P-STAT3 | 35142783  | 35144036  | 1,12 | ENSRNOG00000019489  | RGD1305235 |
| P-STAT3 | 35523486  | 35524745  | 2,01 | ENSRNOG00000019358  | Esr1       |
| P-STAT3 | 41869263  | 41869507  | 1,67 | ENSRNOG00000019048  | Sod2       |
| P-STAT3 | 42113515  | 42114079  | 1,28 | ENSRNOG00000014160  | Tcp1       |
| P-STAT3 | 42113515  | 42114079  | 1,28 | ENSRNOG00000023140  | Q4KLL1_RAT |
| P-STAT3 | 49770944  | 49771273  | 1,4  | ENSRNOG00000013671  | Vom2r9     |
| P-STAT3 | 57121323  | 57121770  | 1,23 | ENSRNOG00000034119  | V1re26     |
| P-STAT3 | 63837074  | 63838228  | 1    | ENSRNOG00000011468  | Tsen34     |
| P-STAT3 | 63837074  | 63838228  | 1    | ENSRNOG00000038794  | Leng4      |
| P-STAT3 | 65743176  | 65744005  | 1,28 | ENSRNOG00000015254  | Olr3       |
| P-STAT3 | 67652637  | 67653181  | 1,28 | ENSRNOG00000016687  | RGD1565772 |
| P-STAT3 | 67652637  | 67653181  | 1,28 | ENSRNOG00000042414  | Nat14      |
| P-STAT3 | 68026092  | 68026621  | 1,51 | ENSRNOG00000018250  | Tnni3      |
| P-STAT3 | 68974230  | 68974579  | 1,28 | ENSRNOG00000018458  | Ncr1       |
| P-STAT3 | 72831478  | 72832337  | 1,56 | ENSRNOG00000038445  | RGD1561909 |
| P-STAT3 | 72888531  | 72889875  | 1,17 | ENSRNOG00000043328  | Chmp2a     |
| P-STAT3 | 76436568  | 76436932  | 1,51 | ENSRNOG00000001494  | Napa       |
| P-STAT3 | 76738731  | 76739390  | 1,28 | ENSRNOG00000015376  | Npas1      |
| P-STAT3 | 77164222  | 77165481  | 1,4  | ENSRNOG00000016434  | Prkd2      |

|         |          |          |      |                    |            |
|---------|----------|----------|------|--------------------|------------|
| P-STAT3 | 77166338 | 77167207 | 1,06 | ENSRNOG00000016434 | Prkd2      |
| P-STAT3 | 78234789 | 78235638 | 1,12 | ENSRNOG00000013395 | Pglyrp1    |
| P-STAT3 | 78914801 | 78915760 | 0,84 | ENSRNOG00000018101 | KLC3_RAT   |
| P-STAT3 | 78916446 | 78917011 | 1,56 | ENSRNOG00000018101 | KLC3_RAT   |
| P-STAT3 | 79008925 | 79009466 | 1,28 | ENSRNOG00000018454 | Apoe       |
| P-STAT3 | 79137915 | 79138339 | 1,28 | ENSRNOG00000043416 | Bcl3       |
| P-STAT3 | 79575926 | 79576905 | 1,17 | ENSRNOG00000019427 | RGD1311676 |
| P-STAT3 | 79812649 | 79813096 | 1,51 | ENSRNOG00000019844 | Irgq       |
| P-STAT3 | 80825603 | 80826340 | 1,79 | ENSRNOG00000037798 | LOC685046  |
| P-STAT3 | 80825603 | 80826340 | 1,79 | ENSRNOG00000020596 | Atp5sl     |
| P-STAT3 | 80830406 | 80831030 | 1,51 | ENSRNOG00000020606 | B3gnt8     |
| P-STAT3 | 80832463 | 80833108 | 1,51 | ENSRNOG00000020606 | B3gnt8     |
| P-STAT3 | 81266886 | 81267341 | 1,28 | ENSRNOG00000033680 | Cyp2b1     |
| P-STAT3 | 83435808 | 83436157 | 1,23 | ENSRNOG00000032034 | Supt5h     |
| P-STAT3 | 83968585 | 83969354 | 1,12 | ENSRNOG00000020380 | Lgals7     |
| P-STAT3 | 85237170 | 85237497 | 1,34 | ENSRNOG00000033023 | LOC688574  |
| P-STAT3 | 85237170 | 85237497 | 1,34 | ENSRNOG00000020821 | Clip3      |
| P-STAT3 | 85259535 | 85260290 | 1    | ENSRNOG00000020830 | RGD1304580 |
| P-STAT3 | 85415224 | 85415583 | 1,34 | ENSRNOG00000020864 | Kirrel2    |
| P-STAT3 | 85415224 | 85415583 | 1,34 | ENSRNOG00000020873 | Nphs1      |
| P-STAT3 | 85486473 | 85487228 | 1,17 | ENSRNOG00000024880 | Ovol3      |
| P-STAT3 | 85486473 | 85487228 | 1,17 | ENSRNOG00000020781 | Tbcb       |
| P-STAT3 | 85494191 | 85494825 | 1,51 | ENSRNOG00000020799 | Polr2i     |
| P-STAT3 | 85600215 | 85600544 | 1,4  | ENSRNOG00000024625 | RGD1565712 |
| P-STAT3 | 85796704 | 85797246 | 1,56 | ENSRNOG00000021015 | Sbsn       |
| P-STAT3 | 86119920 | 86120571 | 1,12 | ENSRNOG00000021095 | Fxyd3      |
| P-STAT3 | 86172445 | 86172994 | 1,28 | ENSRNOG00000021102 | Scn1b      |
| P-STAT3 | 88314263 | 88315012 | 1,34 | ENSRNOG00000021573 | Dpy19l3    |
| P-STAT3 | 90698476 | 90699414 | 1,28 | ENSRNOG00000027724 | Plekhf1    |
| P-STAT3 | 94204719 | 94205168 | 1,28 | ENSRNOG00000018742 | Klk11      |
| P-STAT3 | 94210669 | 94211417 | 2,07 | ENSRNOG00000030281 | Klk10      |
| P-STAT3 | 94242388 | 94242917 | 1,73 | ENSRNOG00000018664 | Klk7       |
| P-STAT3 | 95327445 | 95328400 | 1,12 | ENSRNOG00000020318 | Pnkp       |
| P-STAT3 | 95447942 | 95448391 | 1,62 | ENSRNOG00000026163 | Cpt1c      |
| P-STAT3 | 95600999 | 95602497 | 1    | ENSRNOG00000034855 | SNORD33    |
| P-STAT3 | 95600999 | 95602497 | 1    | ENSRNOG00000035279 | SNORD33    |
| P-STAT3 | 95600999 | 95602497 | 1    | ENSRNOG00000036062 | SNORD34    |
| P-STAT3 | 95600999 | 95602497 | 1    | ENSRNOG00000035241 | SNORD35    |
| P-STAT3 | 95600999 | 95602497 | 1    | ENSRNOG00000020595 | Rps11      |
| P-STAT3 | 95600999 | 95602497 | 1    | ENSRNOG00000035072 | SNORD35    |
| P-STAT3 | 95689390 | 95690806 | 1,4  | ENSRNOG00000020686 | Dkk1l      |
| P-STAT3 | 95689390 | 95690806 | 1,4  | ENSRNOG00000020695 | Tead2      |
| P-STAT3 | 96084908 | 96085454 | 1,23 | ENSRNOG00000020990 | Fgf21      |
| P-STAT3 | 96084908 | 96085454 | 1,23 | ENSRNOG00000020995 | Fut1       |
| P-STAT3 | 96084908 | 96085454 | 1,23 | ENSRNOG00000024678 | Izumo1     |
| P-STAT3 | 96094028 | 96094972 | 1,12 | ENSRNOG00000021004 | Rasip1     |
| P-STAT3 | 96149563 | 96149997 | 1,23 | ENSRNOG00000021016 | Ntn5       |
| P-STAT3 | 96183114 | 96184253 | 1,06 | ENSRNOG00000021032 | Sphk2      |
| P-STAT3 | 96183114 | 96184253 | 1,06 | ENSRNOG00000021035 | Rpl18      |

|         |           |           |      |                     |             |
|---------|-----------|-----------|------|---------------------|-------------|
| P-STAT3 | 96193362  | 96194326  | 0,95 | ENSRNOG00000021037  | Spaca4      |
| P-STAT3 | 96704528  | 96705840  | 1,12 | ENSRNOG00000021130  | ABCC8_RAT   |
| P-STAT3 | 99443112  | 99443773  | 1,12 | ENSRNOG00000014706  | Dbx1        |
| P-STAT3 | 99445121  | 99445650  | 1,51 | ENSRNOG00000014706  | Dbx1        |
| P-STAT3 | 108956177 | 108956621 | 1,67 | ENSRNOG00000010803  | Gabra5      |
| P-STAT3 | 130883998 | 130884354 | 1,34 | ENSRNOG00000011160  | Sv2b        |
| P-STAT3 | 135514002 | 135514258 | 1,45 | ENSRNOG00000015086  | Plin        |
| P-STAT3 | 135618839 | 135619198 | 1,62 | ENSRNOG00000014610  | Anpep       |
| P-STAT3 | 136074635 | 136075879 | 0,89 | ENSRNOG00000013553  | NGRN_RAT    |
| P-STAT3 | 136083346 | 136083680 | 1,23 | ENSRNOG00000013149  | Vps33b      |
| P-STAT3 | 136086121 | 136086670 | 1,12 | ENSRNOG00000013149  | Vps33b      |
| P-STAT3 | 140875449 | 140875912 | 1,23 | ENSRNOG00000013223  | FAAA_RAT    |
| P-STAT3 | 146752878 | 146753317 | 1,23 | ENSRNOG00000018322  | Picalm      |
| P-STAT3 | 146754476 | 146754932 | 1,28 | ENSRNOG00000018322  | Picalm      |
| P-STAT3 | 154944082 | 154944613 | 1,56 | ENSRNOG00000012788  | Clns1a      |
| P-STAT3 | 156142610 | 156143904 | 0,95 | ENSRNOG00000042782  | RGD1561870  |
| P-STAT3 | 156699411 | 156700371 | 1,23 | ENSRNOG00000036859  | Gdpd5       |
| P-STAT3 | 157030642 | 157031611 | 1,06 | ENSRNOG00000017976  | Slco2b1     |
| P-STAT3 | 158917637 | 158918391 | 1,12 | ENSRNOG00000019560  | Pde2a       |
| P-STAT3 | 159292872 | 159293534 | 1,28 | ENSRNOG00000019730  | Inpp1l      |
| P-STAT3 | 159472226 | 159473291 | 0,95 | ENSRNOG00000020150  | Il18bp      |
| P-STAT3 | 160187222 | 160188224 | 1,84 | ENSRNOG00000018517  | Trim21      |
| P-STAT3 | 160220540 | 160221196 | 1,17 | ENSRNOG00000018512  | Olr44       |
| P-STAT3 | 160485645 | 160486194 | 1,28 | ENSRNOG00000015444  | Olr49       |
| P-STAT3 | 160976103 | 160977352 | 0,84 | ENSRNOG00000015785  | Olr85       |
| P-STAT3 | 161688580 | 161689457 | 1,12 | ENSRNOG000000031983 | Olr130      |
| P-STAT3 | 161690285 | 161690859 | 1,23 | ENSRNOG000000031983 | Olr130      |
| P-STAT3 | 162882593 | 162883442 | 1    | ENSRNOG00000017366  | Olr192      |
| P-STAT3 | 163951141 | 163951500 | 1,34 | ENSRNOG000000033440 | Olr209      |
| P-STAT3 | 165542715 | 165543181 | 1,28 | ENSRNOG000000028802 | Olr250      |
| P-STAT3 | 165956839 | 165957971 | 1,06 | ENSRNOG000000033306 | Olr268      |
| P-STAT3 | 165999243 | 165999883 | 1,34 | ENSRNOG000000028923 | Olr270      |
| P-STAT3 | 166407837 | 166408279 | 1,23 | ENSRNOG00000015221  | Eif3f       |
| P-STAT3 | 166407837 | 166408279 | 1,23 | ENSRNOG00000015082  | Nlrp10      |
| P-STAT3 | 167768388 | 167769415 | 1,12 | ENSRNOG00000010017  | Wee1        |
| P-STAT3 | 169964239 | 169965588 | 1,12 | ENSRNOG00000016343  | Dkk3        |
| P-STAT3 | 170073702 | 170074442 | 1,23 | ENSRNOG00000016244  | Mical2      |
| P-STAT3 | 172777434 | 172778172 | 1,45 | ENSRNOG00000011074  | Calcb       |
| P-STAT3 | 176341558 | 176342670 | 0,84 | ENSRNOG00000017751  | Arl6ip1     |
| P-STAT3 | 178972660 | 178973009 | 1,62 | ENSRNOG00000027505  | Abca15      |
| P-STAT3 | 181055640 | 181056314 | 1,34 | ENSRNOG00000019112  | Chp2        |
| P-STAT3 | 184410405 | 184411439 | 1,23 | ENSRNOG000000042706 | LOC10027184 |
| P-STAT3 | 184794365 | 184795311 | 1,12 | ENSRNOG00000016635  | LOC361646   |
| P-STAT3 | 185454432 | 185454883 | 1,28 | ENSRNOG00000017429  | Lat         |
| P-STAT3 | 185713314 | 185713743 | 1,23 | ENSRNOG00000018761  | Eif3c       |
| P-STAT3 | 185713314 | 185713743 | 1,23 | ENSRNOG000000035425 | U6          |
| P-STAT3 | 185852815 | 185853149 | 1,23 | ENSRNOG00000019369  | Giyd2       |
| P-STAT3 | 186478111 | 186478980 | 1,17 | ENSRNOG00000017804  | 01-wrz      |
| P-STAT3 | 186541757 | 186542313 | 1,23 | ENSRNOG000000030632 | Sephs2      |

|         |           |           |      |                    |             |
|---------|-----------|-----------|------|--------------------|-------------|
| P-STAT3 | 186877962 | 186878821 | 1,79 | ENSRNOG00000028771 | LOC691909   |
| P-STAT3 | 187121916 | 187122447 | 1,34 | ENSRNOG00000019302 | Stx4        |
| P-STAT3 | 187159339 | 187159666 | 1,34 | ENSRNOG00000016683 | Znf668      |
| P-STAT3 | 187159339 | 187159666 | 1,34 | ENSRNOG00000026115 | Znf646      |
| P-STAT3 | 187465370 | 187465840 | 1,34 | ENSRNOG00000019851 | CX6A2_RAT   |
| P-STAT3 | 198963181 | 198963640 | 1,28 | ENSRNOG00000006962 | Stk32c      |
| P-STAT3 | 198986383 | 198986927 | 1,23 | ENSRNOG00000017538 | Lrrc27      |
| P-STAT3 | 201276300 | 201276944 | 1,12 | ENSRNOG00000015152 | Pkp3        |
| P-STAT3 | 201485181 | 201486115 | 1,17 | ENSRNOG00000017927 | Drd4        |
| P-STAT3 | 201646027 | 201646476 | 1,4  | ENSRNOG00000019199 | Efcab4a     |
| P-STAT3 | 201649703 | 201650352 | 1,34 | ENSRNOG00000019215 | Cd151       |
| P-STAT3 | 202682099 | 202682452 | 1,34 | ENSRNOG00000020245 | Syt8        |
| P-STAT3 | 202824954 | 202825393 | 1,23 | ENSRNOG00000040350 | rno-mir-675 |
| P-STAT3 | 202824954 | 202825393 | 1,23 | ENSRNOG00000020367 | Mir675      |
| P-STAT3 | 204244213 | 204244705 | 1,23 | ENSRNOG00000020776 | Dhcr7       |
| P-STAT3 | 205368309 | 205369540 | 1,06 | ENSRNOG00000020918 | Ccnd1       |
| P-STAT3 | 205771918 | 205772562 | 1,34 | ENSRNOG00000013448 | Mrgprd      |
| P-STAT3 | 206736925 | 206738170 | 1,23 | ENSRNOG00000021724 | Ptprcap     |
| P-STAT3 | 206747005 | 206747854 | 1,12 | ENSRNOG00000021689 | Rps6kb2     |
| P-STAT3 | 207208572 | 207209403 | 0,95 | ENSRNOG00000019356 | LOC688721   |
| P-STAT3 | 207524806 | 207525840 | 1,73 | ENSRNOG00000019832 | Bbs1        |
| P-STAT3 | 207643306 | 207644260 | 1,17 | ENSRNOG00000020025 | Slc29a2     |
| P-STAT3 | 207659137 | 207660192 | 1,23 | ENSRNOG00000020110 | B3gnt1      |
| P-STAT3 | 207659137 | 207660192 | 1,23 | ENSRNOG00000020117 | Brms1       |
| P-STAT3 | 207669322 | 207670371 | 1,79 | ENSRNOG00000020133 | Rin1        |
| P-STAT3 | 208068430 | 208068857 | 2,07 | ENSRNOG00000020551 | Bles03      |
| P-STAT3 | 208111533 | 208112320 | 1,34 | ENSRNOG00000027096 | Ctsw        |
| P-STAT3 | 208311697 | 208312664 | 1,23 | ENSRNOG00000020742 | Pcnxl3      |
| P-STAT3 | 208311697 | 208312664 | 1,23 | ENSRNOG00000020773 | Map3k11     |
| P-STAT3 | 208548146 | 208549303 | 1,56 | ENSRNOG00000020892 | Dpf2        |
| P-STAT3 | 208681276 | 208681750 | 1,23 | ENSRNOG00000020950 | Syvn1       |
| P-STAT3 | 208882767 | 208883006 | 1,28 | ENSRNOG00000021000 | NALDL_RAT   |
| P-STAT3 | 209055434 | 209056178 | 1,12 | ENSRNOG00000043503 | Ehd1        |
| P-STAT3 | 209583348 | 209583697 | 1,67 | ENSRNOG00000021132 | RGD1309710  |
| P-STAT3 | 209589106 | 209590673 | 1,12 | ENSRNOG00000021125 | Prdx5       |
| P-STAT3 | 209668641 | 209669391 | 1,12 | ENSRNOG00000023023 | Trpt1       |
| P-STAT3 | 209668641 | 209669391 | 1,12 | ENSRNOG00000021158 | Nudt22      |
| P-STAT3 | 209668641 | 209669391 | 1,12 | ENSRNOG00000043060 | Dnajc4      |
| P-STAT3 | 209771339 | 209772918 | 1    | ENSRNOG00000022428 | Flrt1       |
| P-STAT3 | 211409219 | 211409863 | 1,12 | ENSRNOG00000018847 | Stx5        |
| P-STAT3 | 211427597 | 211428361 | 1    | ENSRNOG00000019069 | Nxf1        |
| P-STAT3 | 212696185 | 212696721 | 1,28 | ENSRNOG00000020531 | Fen1        |
| P-STAT3 | 213097375 | 213097715 | 1,51 | ENSRNOG00000020704 | Dak         |
| P-STAT3 | 214597340 | 214598994 | 1    | ENSRNOG00000021013 | Stx3        |
| P-STAT3 | 215577346 | 215577690 | 1,45 | ENSRNOG00000012067 | Fam111a     |
| P-STAT3 | 216123812 | 216124293 | 1,28 | ENSRNOG00000031007 | Olr347      |
| P-STAT3 | 216307825 | 216308571 | 1,12 | ENSRNOG00000031830 | Olr357      |
| P-STAT3 | 222229372 | 222230311 | 1    | ENSRNOG00000012156 | Ostf1       |
| P-STAT3 | 222229372 | 222230311 | 1    | ENSRNOG00000012665 | LOC499330   |

|         |           |           |      |                    |              |
|---------|-----------|-----------|------|--------------------|--------------|
| P-STAT3 | 227964775 | 227965208 | 1,4  | ENSRNOG00000015232 | Pip5k1b      |
| P-STAT3 | 232603868 | 232604312 | 1,4  | ENSRNOG00000015137 | RGD1310039   |
| P-STAT3 | 233776792 | 233777248 | 1,28 | ENSRNOG00000011308 | Uhrf2        |
| P-STAT3 | 238571356 | 238571710 | 1,34 | ENSRNOG00000022839 | Ifit3        |
| P-STAT3 | 238890705 | 238892394 | 0,84 | ENSRNOG00000018929 | Kif20b       |
| P-STAT3 | 241948464 | 241949513 | 1    | ENSRNOG00000016750 | Cyp26a1      |
| P-STAT3 | 246963863 | 246964842 | 1,23 | ENSRNOG00000026065 | Slit1        |
| P-STAT3 | 249081986 | 249082520 | 1,28 | ENSRNOG00000012684 | Bloc1s2      |
| P-STAT3 | 249601545 | 249603197 | 0,95 | ENSRNOG00000014234 | Hif1an       |
| P-STAT3 | 249601545 | 249603197 | 0,95 | ENSRNOG00000014078 | Ndufb8       |
| P-STAT3 | 250056785 | 250058236 | 1,67 | ENSRNOG00000014650 | Sema4g       |
| P-STAT3 | 250254951 | 250255310 | 1,23 | ENSRNOG00000016120 | Tlx1         |
| P-STAT3 | 251351805 | 251352357 | 1,23 | ENSRNOG00000019124 | Elovl3       |
| P-STAT3 | 251556857 | 251557701 | 1,12 | ENSRNOG00000019574 | CUED2_RAT    |
| P-STAT3 | 251556857 | 251557701 | 1,12 | ENSRNOG00000040448 | rno-mir-146b |
| P-STAT3 | 252409585 | 252410222 | 1,17 | ENSRNOG00000020304 | Pdcd11       |
| P-STAT3 | 252460422 | 252461162 | 1,12 | ENSRNOG00000020325 | Calhm2       |
| P-STAT3 | 252909251 | 252909883 | 1,28 | ENSRNOG00000020376 | Obfc1        |
| P-STAT3 | 253060412 | 253061236 | 1,51 | ENSRNOG00000012110 | Col17a1      |
| P-STAT3 | 262554359 | 262555513 | 1,34 | ENSRNOG00000016659 | Habp2        |
| P-STAT3 | 264874530 | 264876280 | 1    | ENSRNOG00000017438 | Gfra1        |
| P-STAT3 | 10491088  | 10491412  | 1,66 | ENSRNOG00000002895 | Nagpa        |
| P-STAT3 | 10492081  | 10492430  | 1,22 | ENSRNOG00000002895 | Nagpa        |
| P-STAT3 | 10646021  | 10646705  | 1,11 | ENSRNOG00000003065 | N-pac        |
| P-STAT3 | 11068623  | 11069319  | 1,16 | ENSRNOG00000004608 | Magmas       |
| P-STAT3 | 11920630  | 11921079  | 1,27 | ENSRNOG00000007576 | Znf597       |
| P-STAT3 | 13287902  | 13288366  | 1,38 | ENSRNOG00000005336 | Prss27       |
| P-STAT3 | 13475429  | 13475883  | 1,72 | ENSRNOG00000007436 | LOC10015822  |
| P-STAT3 | 13475429  | 13475883  | 1,72 | ENSRNOG00000045099 | U6           |
| P-STAT3 | 13669646  | 13670076  | 1,33 | ENSRNOG00000008703 | Rnps1        |
| P-STAT3 | 13971072  | 13971341  | 1,38 | ENSRNOG00000014179 | Rps2         |
| P-STAT3 | 13971072  | 13971341  | 1,38 | ENSRNOG00000040534 | SNORA64      |
| P-STAT3 | 14141650  | 14142179  | 1,33 | ENSRNOG00000015749 | Nme3         |
| P-STAT3 | 14141650  | 14142179  | 1,33 | ENSRNOG00000015479 | Mrps34       |
| P-STAT3 | 14145431  | 14147000  | 0,83 | ENSRNOG00000015749 | Nme3         |
| P-STAT3 | 14145431  | 14147000  | 0,83 | ENSRNOG00000024867 | RGD1304924   |
| P-STAT3 | 14488726  | 14489065  | 1,33 | ENSRNOG00000024455 | Gnptg        |
| P-STAT3 | 14488726  | 14489065  | 1,33 | ENSRNOG00000017858 | RGD1565744   |
| P-STAT3 | 14995641  | 14996065  | 1,22 | ENSRNOG00000019174 | Chtf18       |
| P-STAT3 | 14995641  | 14996065  | 1,22 | ENSRNOG00000023639 | Rpusd1       |
| P-STAT3 | 15080767  | 15081293  | 1,49 | ENSRNOG00000022248 | Fbxl16       |
| P-STAT3 | 15091409  | 15091934  | 1,27 | ENSRNOG00000019729 | Jmjd8        |
| P-STAT3 | 15098864  | 15099713  | 1,38 | ENSRNOG00000019798 | Stub1        |
| P-STAT3 | 15100709  | 15102143  | 1,05 | ENSRNOG00000019798 | Stub1        |
| P-STAT3 | 15100709  | 15102143  | 1,05 | ENSRNOG00000019921 | Rhbdl1       |
| P-STAT3 | 15113290  | 15114045  | 1,33 | ENSRNOG00000019930 | Rhot2        |
| P-STAT3 | 15584455  | 15585015  | 1,11 | ENSRNOG00000029886 | Hba-a2       |
| P-STAT3 | 18474108  | 18474457  | 1,49 | ENSRNOG00000032417 | GBRP_RAT     |
| P-STAT3 | 25763622  | 25764073  | 1,22 | ENSRNOG00000003202 | Hmmr         |

|         |          |          |      |                      |            |
|---------|----------|----------|------|----------------------|------------|
| P-STAT3 | 25763622 | 25764073 | 1,22 | ENSRNOG00000003225   | Nudcd2     |
| P-STAT3 | 25763622 | 25764073 | 1,22 | ENSRNOG000000041833  | U4         |
| P-STAT3 | 34141404 | 34141840 | 1,22 | ENSRNOG000000031138  | Irgm       |
| P-STAT3 | 37097780 | 37098214 | 1,38 | ENSRNOG000000022076  | Agxt2l2    |
| P-STAT3 | 40590325 | 40591164 | 1,11 | ENSRNOG000000011892  | Slc36a2    |
| P-STAT3 | 44093615 | 44094164 | 1,27 | ENSRNOG000000002845  | LOC691286  |
| P-STAT3 | 44461501 | 44461861 | 1,22 | ENSRNOG000000031194  | Olr1431    |
| P-STAT3 | 45056657 | 45057197 | 1,38 | ENSRNOG000000032501  | Olr1458    |
| P-STAT3 | 45471064 | 45471932 | 1,22 | ENSRNOG000000022725  | RGD1306000 |
| P-STAT3 | 45508684 | 45509037 | 1,22 | ENSRNOG000000002944  | RGD1304587 |
| P-STAT3 | 47739247 | 47739700 | 1,22 | ENSRNOG000000002523  | Epn2       |
| P-STAT3 | 53775601 | 53776150 | 1,55 | ENSRNOG000000002987  | Myh1       |
| P-STAT3 | 54408728 | 54409477 | 1,11 | ENSRNOG000000003633  | Rcvrn      |
| P-STAT3 | 55132673 | 55134043 | 1    | ENSRNOG000000003947  | Ntn1       |
| P-STAT3 | 55715931 | 55716474 | 1,27 | ENSRNOG000000004566  | Arhgef15   |
| P-STAT3 | 55847608 | 55848957 | 1,11 | ENSRNOG000000006989  | Vamp2      |
| P-STAT3 | 56202228 | 56203187 | 1,11 | ENSRNOG0000000037613 | Jmjd3      |
| P-STAT3 | 56397563 | 56398898 | 1,05 | ENSRNOG000000010520  | Wdr79      |
| P-STAT3 | 56397563 | 56398898 | 1,05 | ENSRNOG000000010756  | Tp53       |
| P-STAT3 | 56754923 | 56755577 | 1,27 | ENSRNOG000000016360  | Gps2       |
| P-STAT3 | 56896610 | 56897034 | 1,27 | ENSRNOG000000018693  | Asgr1      |
| P-STAT3 | 57529085 | 57529546 | 1,11 | ENSRNOG000000003815  | Slc25a11   |
| P-STAT3 | 57582136 | 57582585 | 1,33 | ENSRNOG0000000035300 | U3         |
| P-STAT3 | 57582136 | 57582585 | 1,33 | ENSRNOG0000000037418 | Inca1      |
| P-STAT3 | 59197315 | 59198164 | 1    | ENSRNOG000000014953  | Fbxo39     |
| P-STAT3 | 59376588 | 59376917 | 1,99 | ENSRNOG000000015801  | Spns2      |
| P-STAT3 | 59852308 | 59852967 | 1,11 | ENSRNOG000000017912  | Atp2a3     |
| P-STAT3 | 62756153 | 62756482 | 1,49 | ENSRNOG000000003233  | Serpinf2   |
| P-STAT3 | 62758197 | 62758746 | 1,27 | ENSRNOG000000003233  | Serpinf2   |
| P-STAT3 | 62771240 | 62772362 | 1,05 | ENSRNOG000000003243  | Wdr81      |
| P-STAT3 | 64532055 | 64533212 | 1    | ENSRNOG000000010337  | Slc13a2    |
| P-STAT3 | 64607448 | 64607808 | 1,44 | ENSRNOG000000010031  | Q7TQ11_RAT |
| P-STAT3 | 64607448 | 64607808 | 1,44 | ENSRNOG000000010244  | Sarm1      |
| P-STAT3 | 64865760 | 64866099 | 1,33 | ENSRNOG000000022582  | Fam58b     |
| P-STAT3 | 65443038 | 65443362 | 1,33 | ENSRNOG000000012929  | Wsb1       |
| P-STAT3 | 65778354 | 65779016 | 1,11 | ENSRNOG000000014135  | Rab11fip4  |
| P-STAT3 | 65778354 | 65779016 | 1,11 | ENSRNOG0000000045307 | U6         |
| P-STAT3 | 71550498 | 71551287 | 1,22 | ENSRNOG000000010335  | Mmp28      |
| P-STAT3 | 71550498 | 71551287 | 1,22 | ENSRNOG000000010604  | Taf15      |
| P-STAT3 | 71745040 | 71745588 | 1,38 | ENSRNOG000000011205  | Ccl3       |
| P-STAT3 | 73147127 | 73147681 | 1,22 | ENSRNOG000000027860  | Ggnbp2     |
| P-STAT3 | 75081742 | 75082417 | 1,11 | ENSRNOG000000004549  | Dhx40      |
| P-STAT3 | 75884018 | 75884452 | 1,33 | ENSRNOG000000007496  | Mtmr4      |
| P-STAT3 | 82852821 | 82853248 | 1,61 | ENSRNOG000000002828  | Tob1       |
| P-STAT3 | 84283817 | 84284297 | 1,83 | ENSRNOG000000005392  | Ngfr       |
| P-STAT3 | 85190385 | 85191334 | 1,22 | ENSRNOG000000023881  | Skap1      |
| P-STAT3 | 85193248 | 85194197 | 1,05 | ENSRNOG000000023881  | Skap1      |
| P-STAT3 | 86322878 | 86323704 | 1,16 | ENSRNOG000000011475  | Snip       |
| P-STAT3 | 86750080 | 86751660 | 1    | ENSRNOG000000021536  | Plxdc1     |

|         |           |           |      |                     |            |
|---------|-----------|-----------|------|---------------------|------------|
| P-STAT3 | 87526929  | 87527362  | 1,22 | ENSRNOG00000009066  | Thra       |
| P-STAT3 | 87935986  | 87936655  | 1,11 | ENSRNOG00000010665  | Ccr7       |
| P-STAT3 | 88488714  | 88489271  | 1,22 | ENSRNOG00000013896  | Krt40      |
| P-STAT3 | 89044513  | 89045073  | 1,22 | ENSRNOG000000031805 | Krt1-5     |
| P-STAT3 | 89060898  | 89061547  | 1,16 | ENSRNOG00000014070  | Krt13      |
| P-STAT3 | 89148245  | 89148695  | 1,44 | ENSRNOG00000003899  | Krt14      |
| P-STAT3 | 89177116  | 89178050  | 1,11 | ENSRNOG00000014441  | Krt16      |
| P-STAT3 | 89199335  | 89200007  | 1,11 | ENSRNOG00000034087  | Krt42      |
| P-STAT3 | 89517049  | 89517776  | 1,11 | ENSRNOG00000017496  | Cnp        |
| P-STAT3 | 89650915  | 89651464  | 1,27 | ENSRNOG00000018364  | Gcn5l2     |
| P-STAT3 | 89650915  | 89651464  | 1,27 | ENSRNOG000000036819 | Hspb9      |
| P-STAT3 | 89742590  | 89743044  | 1,22 | ENSRNOG00000019075  | Stat5b     |
| P-STAT3 | 90572658  | 90573807  | 0,94 | ENSRNOG00000020701  | Brca1      |
| P-STAT3 | 90572658  | 90573807  | 0,94 | ENSRNOG00000020730  | Nbr1       |
| P-STAT3 | 90827517  | 90828270  | 1,22 | ENSRNOG00000020792  | Etv4       |
| P-STAT3 | 91041235  | 91041589  | 1,49 | ENSRNOG00000036796  | RGD1565533 |
| P-STAT3 | 91470424  | 91471269  | 1,38 | ENSRNOG00000020951  | Slc4a1     |
| P-STAT3 | 91813662  | 91814107  | 1,22 | ENSRNOG00000002748  | Ccdc43     |
| P-STAT3 | 92407231  | 92408185  | 1,22 | ENSRNOG00000003275  | RGD1359156 |
| P-STAT3 | 92552705  | 92553477  | 1,33 | ENSRNOG000000028569 | Arhgap27   |
| P-STAT3 | 95557690  | 95558163  | 1,22 | ENSRNOG000000025448 | Limd2      |
| P-STAT3 | 95654331  | 95654780  | 1,66 | ENSRNOG000000034533 | SNORA51    |
| P-STAT3 | 95654331  | 95654780  | 1,66 | ENSRNOG000000009857 | RRMJ3_RAT  |
| P-STAT3 | 99107037  | 99107791  | 1,38 | ENSRNOG000000042738 | Prkar1a    |
| P-STAT3 | 103246849 | 103247578 | 1,16 | ENSRNOG000000002793 | Sstr2      |
| P-STAT3 | 105706806 | 105707753 | 1    | ENSRNOG000000003918 | Slc25a19   |
| P-STAT3 | 105819673 | 105820217 | 1,66 | ENSRNOG000000003990 | Grb2       |
| P-STAT3 | 105918699 | 105919028 | 1,66 | ENSRNOG000000004310 | Caskin2    |
| P-STAT3 | 106244891 | 106245645 | 1,05 | ENSRNOG000000008256 | Mrpl38     |
| P-STAT3 | 106246886 | 106247272 | 1,27 | ENSRNOG000000008256 | Mrpl38     |
| P-STAT3 | 106356651 | 106357520 | 1,22 | ENSRNOG000000009343 | Evpl       |
| P-STAT3 | 106813850 | 106814679 | 1,61 | ENSRNOG00000012083  | St6galnac2 |
| P-STAT3 | 106953776 | 106954134 | 1,27 | ENSRNOG000000000247 | Mfsd11     |
| P-STAT3 | 107958261 | 107958830 | 1,22 | ENSRNOG000000002946 | Socs3      |
| P-STAT3 | 109779709 | 109780247 | 1,11 | ENSRNOG000000036701 | Actg1      |
| P-STAT3 | 109786944 | 109787288 | 1,44 | ENSRNOG000000036700 | Fscn2      |
| P-STAT3 | 109995988 | 109996837 | 1,27 | ENSRNOG000000036685 | Npb        |
| P-STAT3 | 109999467 | 110000313 | 1,11 | ENSRNOG000000036685 | Npb        |
| P-STAT3 | 110012269 | 110012589 | 1,33 | ENSRNOG000000036684 | Pcyt2      |
| P-STAT3 | 110039601 | 110040645 | 1    | ENSRNOG000000036682 | Pycr1      |
| P-STAT3 | 110039601 | 110040645 | 1    | ENSRNOG000000036681 | Myadml2    |
| P-STAT3 | 110282348 | 110282705 | 1,22 | ENSRNOG000000036673 | Sectm1b    |
| P-STAT3 | 2179735   | 2180479   | 1,16 | ENSRNOG000000000718 | Cggbp1     |
| P-STAT3 | 15800113  | 15800650  | 1,28 | ENSRNOG000000001573 | Usp25      |
| P-STAT3 | 28105898  | 28107436  | 1,22 | ENSRNOG000000001575 | Grik1      |
| P-STAT3 | 28774573  | 28775142  | 1,22 | ENSRNOG000000040064 | Krtap16-5  |
| P-STAT3 | 29298558  | 29298902  | 1,33 | ENSRNOG000000043017 | Krtap7-1   |
| P-STAT3 | 32312663  | 32313606  | 1,22 | ENSRNOG000000001986 | LOC498063  |
| P-STAT3 | 34879225  | 34879754  | 1,22 | ENSRNOG000000001662 | Dyrk1a     |

|         |          |          |      |                     |            |
|---------|----------|----------|------|---------------------|------------|
| P-STAT3 | 37461416 | 37461855 | 1,39 | ENSRNOG00000001959  | Mx1        |
| P-STAT3 | 37616412 | 37617239 | 1,22 | ENSRNOG00000001976  | Tmprss2    |
| P-STAT3 | 41965568 | 41966660 | 1,16 | ENSRNOG000000039704 | Olr1538    |
| P-STAT3 | 42093346 | 42093888 | 1,39 | ENSRNOG000000029721 | Olr1543    |
| P-STAT3 | 64975147 | 64975686 | 1,22 | ENSRNOG000000026085 | Rabl3      |
| P-STAT3 | 66152897 | 66153521 | 1,28 | ENSRNOG00000002265  | Casr       |
| P-STAT3 | 67946562 | 67947000 | 1,61 | ENSRNOG00000002187  | Ropn1      |
| P-STAT3 | 68192434 | 68193063 | 1,11 | ENSRNOG00000001706  | Kalrn      |
| P-STAT3 | 68195985 | 68196324 | 2,72 | ENSRNOG00000001706  | Kalrn      |
| P-STAT3 | 70201182 | 70201531 | 1,39 | ENSRNOG00000001757  | Tm4sf19    |
| P-STAT3 | 82425235 | 82425586 | 1,33 | ENSRNOG00000001748  | Polr2h     |
| P-STAT3 | 82425235 | 82425586 | 1,33 | ENSRNOG00000001742  | Clcn2      |
| P-STAT3 | 82832397 | 82832851 | 1,22 | ENSRNOG000000023271 | PARL_RAT   |
| P-STAT3 | 84747144 | 84747483 | 1,28 | ENSRNOG000000021891 | Zdhhc8     |
| P-STAT3 | 84997817 | 84998156 | 1,55 | ENSRNOG00000001839  | Vpreb2     |
| P-STAT3 | 85079239 | 85079789 | 1,28 | ENSRNOG000000037997 | Tssk2      |
| P-STAT3 | 85079239 | 85079789 | 1,28 | ENSRNOG000000032856 | Tssk1      |
| P-STAT3 | 85079239 | 85079789 | 1,28 | ENSRNOG000000029216 | Dgcr2      |
| P-STAT3 | 85443247 | 85443792 | 1,28 | ENSRNOG00000001873  | P2rx6      |
| P-STAT3 | 85851030 | 85851764 | 1,28 | ENSRNOG00000001861  | Ydjc       |
| P-STAT3 | 86146997 | 86147346 | 1,61 | ENSRNOG00000001845  | Top3b      |
| P-STAT3 | 86146997 | 86147346 | 1,61 | ENSRNOG000000043140 | Vpreb1     |
| P-STAT3 | 8980283  | 8981232  | 1,09 | ENSRNOG000000039832 | Gpcr12     |
| P-STAT3 | 9136739  | 9137296  | 1,26 | ENSRNOG00000000969  | Cyp3a18    |
| P-STAT3 | 9802669  | 9803038  | 1,37 | ENSRNOG00000000991  | Arpc1b     |
| P-STAT3 | 9803294  | 9804118  | 0,99 | ENSRNOG00000000991  | Arpc1b     |
| P-STAT3 | 11342743 | 11343476 | 1,2  | ENSRNOG000000024605 | LOC498145  |
| P-STAT3 | 14509627 | 14509956 | 1,26 | ENSRNOG00000001250  | Lfng       |
| P-STAT3 | 14577981 | 14578830 | 0,99 | ENSRNOG00000001252  | Chst12     |
| P-STAT3 | 14692083 | 14693132 | 0,99 | ENSRNOG00000001253  | Eif3s9     |
| P-STAT3 | 15803298 | 15803727 | 1,2  | ENSRNOG00000001290  | Cox19      |
| P-STAT3 | 16521785 | 16522188 | 1,2  | ENSRNOG000000028651 | RGD1566386 |
| P-STAT3 | 16817606 | 16817940 | 1,7  | ENSRNOG00000001324  | Asmt       |
| P-STAT3 | 16821841 | 16823265 | 0,99 | ENSRNOG00000001324  | Asmt       |
| P-STAT3 | 16821841 | 16823265 | 0,99 | ENSRNOG000000028211 | LOC288526  |
| P-STAT3 | 16821841 | 16823265 | 0,99 | ENSRNOG000000028166 | Asmtl      |
| P-STAT3 | 16832340 | 16833287 | 1,15 | ENSRNOG00000001325  | Il3ra      |
| P-STAT3 | 19585983 | 19586434 | 1,64 | ENSRNOG00000001410  | Gigyf1     |
| P-STAT3 | 19690591 | 19691450 | 0,99 | ENSRNOG00000001402  | Lrch4      |
| P-STAT3 | 19690591 | 19691450 | 0,99 | ENSRNOG000000024922 | Fbxo24     |
| P-STAT3 | 20820920 | 20821975 | 0,99 | ENSRNOG00000001419  | Cldn15     |
| P-STAT3 | 21542776 | 21543225 | 1,2  | ENSRNOG00000001425  | Sh2b2      |
| P-STAT3 | 22470372 | 22470706 | 1,31 | ENSRNOG00000001451  | Fkbp6      |
| P-STAT3 | 23174812 | 23175368 | 1,48 | ENSRNOG000000021856 | Lat2       |
| P-STAT3 | 27573503 | 27574357 | 0,99 | ENSRNOG000000042384 | Kctd7      |
| P-STAT3 | 27894865 | 27896019 | 1,04 | ENSRNOG000000038495 | 14-wrz     |
| P-STAT3 | 28739152 | 28739606 | 1,2  | ENSRNOG00000000938  | Ran        |
| P-STAT3 | 33122276 | 33122900 | 1,15 | ENSRNOG00000001019  | Tect2      |
| P-STAT3 | 33607667 | 33608308 | 1,31 | ENSRNOG00000001080  | Arl6ip4    |

|         |          |          |      |                     |          |
|---------|----------|----------|------|---------------------|----------|
| P-STAT3 | 33783403 | 33784452 | 1,04 | ENSRNOG000000038002 | Ccdc62   |
| P-STAT3 | 34548333 | 34548964 | 1,59 | ENSRNOG00000001338  | Hpd      |
| P-STAT3 | 35116650 | 35117181 | 1,2  | ENSRNOG00000001296  | P2rx7    |
| P-STAT3 | 35120554 | 35121383 | 1,37 | ENSRNOG00000001296  | P2rx7    |
| P-STAT3 | 36147975 | 36148706 | 1,04 | ENSRNOG00000001347  | Adam1a   |
| P-STAT3 | 36797192 | 36797641 | 1,15 | ENSRNOG00000024462  | Oas1d    |
| P-STAT3 | 37296054 | 37297572 | 1,31 | ENSRNOG00000001391  | Sdsl     |
| P-STAT3 | 42761707 | 42762374 | 1,31 | ENSRNOG00000001177  | Acads    |
| P-STAT3 | 42969184 | 42970356 | 1,26 | ENSRNOG00000001187  | Oasl     |
| P-STAT3 | 43225750 | 43226497 | 1,31 | ENSRNOG00000001195  | Trpv4    |
| P-STAT3 | 43370781 | 43371221 | 1,42 | ENSRNOG00000000691  | Foxn4    |
| P-STAT3 | 43532792 | 43533126 | 1,2  | ENSRNOG00000000692  | Ung      |
| P-STAT3 | 43841990 | 43843337 | 1,26 | ENSRNOG00000000699  | Selplg   |
| P-STAT3 | 46033284 | 46033640 | 1,42 | ENSRNOG00000037483  | Ep400    |
| P-STAT3 | 46164512 | 46164841 | 1,31 | ENSRNOG00000037480  | Ddx51    |
| P-STAT3 | 18233607 | 18234193 | 1,24 | ENSRNOG00000029841  | Cdh19    |
| P-STAT3 | 38182255 | 38182814 | 1,41 | ENSRNOG00000021586  | Gpr39    |
| P-STAT3 | 46276228 | 46276877 | 1,13 | ENSRNOG00000028368  | Etnk2    |
| P-STAT3 | 47148153 | 47149484 | 1,07 | ENSRNOG00000003336  | Mybph    |
| P-STAT3 | 48093975 | 48095136 | 1,24 | ENSRNOG00000005277  | Ptprv    |
| P-STAT3 | 48093975 | 48095136 | 1,24 | ENSRNOG00000005807  | Ptpn7    |
| P-STAT3 | 48320921 | 48321754 | 1,13 | ENSRNOG00000007185  | Lmod1    |
| P-STAT3 | 57603654 | 57604062 | 1,29 | ENSRNOG00000003545  | Uchl5    |
| P-STAT3 | 57603654 | 57604062 | 1,29 | ENSRNOG00000043601  | snoU109  |
| P-STAT3 | 58629766 | 58630727 | 1,13 | ENSRNOG00000003959  | Rgs18    |
| P-STAT3 | 66374375 | 66374737 | 1,24 | ENSRNOG00000002454  | Rnf2     |
| P-STAT3 | 75271073 | 75271712 | 1,41 | ENSRNOG00000002468  | Tnr      |
| P-STAT3 | 75570809 | 75571463 | 1,13 | ENSRNOG00000002548  | Tnn      |
| P-STAT3 | 76592433 | 76593078 | 1,35 | ENSRNOG00000035904  | SNORD74  |
| P-STAT3 | 76592433 | 76593078 | 1,35 | ENSRNOG00000041615  | SNORD75  |
| P-STAT3 | 76592433 | 76593078 | 1,35 | ENSRNOG00000040819  | SNORD24  |
| P-STAT3 | 76592433 | 76593078 | 1,35 | ENSRNOG00000040499  | SNORD44  |
| P-STAT3 | 76592433 | 76593078 | 1,35 | ENSRNOG00000040783  | SNORD78  |
| P-STAT3 | 76592433 | 76593078 | 1,35 | ENSRNOG00000040595  | SNORD79  |
| P-STAT3 | 76592433 | 76593078 | 1,35 | ENSRNOG00000035336  | SNORD77  |
| P-STAT3 | 76592433 | 76593078 | 1,35 | ENSRNOG00000035760  | SNORD47  |
| P-STAT3 | 76592433 | 76593078 | 1,35 | ENSRNOG00000034422  | SNORD81  |
| P-STAT3 | 77481609 | 77481965 | 1,86 | ENSRNOG00000002978  | Faslg    |
| P-STAT3 | 80071356 | 80072507 | 1,01 | ENSRNOG00000002884  | Blzf1    |
| P-STAT3 | 81515930 | 81516399 | 1,13 | ENSRNOG00000003298  | Cd247    |
| P-STAT3 | 81515930 | 81516399 | 1,13 | ENSRNOG00000044631  | 5S_rRNA  |
| P-STAT3 | 81974060 | 81974926 | 1,07 | ENSRNOG00000003790  | Mael     |
| P-STAT3 | 82328870 | 82329234 | 1,24 | ENSRNOG00000025119  | Fmo9     |
| P-STAT3 | 83354567 | 83354921 | 1,24 | ENSRNOG00000004642  | Lmx1a    |
| P-STAT3 | 86865299 | 86865747 | 1,24 | ENSRNOG00000024382  | Fcgr3a   |
| P-STAT3 | 87136445 | 87137692 | 0,9  | ENSRNOG00000038372  | Ndufs2   |
| P-STAT3 | 87136445 | 87137692 | 0,9  | ENSRNOG00000003538  | Adamts4  |
| P-STAT3 | 87291010 | 87291466 | 1,41 | ENSRNOG00000004192  | Arhgap30 |
| P-STAT3 | 88055810 | 88056149 | 1,29 | ENSRNOG00000005166  | Nhlh1    |

|         |           |           |      |                     |            |
|---------|-----------|-----------|------|---------------------|------------|
| P-STAT3 | 88486111  | 88486960  | 1,29 | ENSRNOG00000008054  | Igsf9      |
| P-STAT3 | 96582838  | 96583574  | 1,13 | ENSRNOG00000003247  | RGD1305572 |
| P-STAT3 | 96663549  | 96665128  | 0,9  | ENSRNOG00000003286  | Lefty1     |
| P-STAT3 | 98828020  | 98828691  | 1,24 | ENSRNOG00000003562  | Susd4      |
| P-STAT3 | 100838080 | 100839028 | 1,07 | ENSRNOG000000037850 | Mosc2      |
| P-STAT3 | 103082441 | 103083177 | 1,13 | ENSRNOG00000002501  | RGD1309586 |
| P-STAT3 | 109220028 | 109220402 | 1,97 | ENSRNOG00000006470  | Camk1g     |
| P-STAT3 | 920258    | 921117    | 1,17 | ENSRNOG00000028855  | Vom2r71    |
| P-STAT3 | 1913102   | 1913953   | 1,4  | ENSRNOG00000000065  | Pde6b      |
| P-STAT3 | 3007134   | 3007590   | 1,29 | ENSRNOG00000002073  | Brdt       |
| P-STAT3 | 5612709   | 5613148   | 1,68 | ENSRNOG00000022032  | Abcg3l2    |
| P-STAT3 | 6288645   | 6289194   | 1,57 | ENSRNOG00000030216  | Abcg3l1    |
| P-STAT3 | 6541776   | 6542334   | 1,29 | ENSRNOG00000002154  | Mepe       |
| P-STAT3 | 6858809   | 6859363   | 1,23 | ENSRNOG00000002210  | Hsd17b11   |
| P-STAT3 | 12800125  | 12800701  | 1,62 | ENSRNOG00000002004  | Prdm8      |
| P-STAT3 | 14872533  | 14873061  | 1,4  | ENSRNOG00000002070  | Mrpl1      |
| P-STAT3 | 17556186  | 17557314  | 1,17 | ENSRNOG00000002433  | G3bp2      |
| P-STAT3 | 17598748  | 17599202  | 1,34 | ENSRNOG00000002506  | CDKL2_RAT  |
| P-STAT3 | 20164121  | 20164855  | 1,17 | ENSRNOG00000003119  | Gc         |
| P-STAT3 | 20738271  | 20738796  | 1,45 | ENSRNOG00000003134  | Slc4a4     |
| P-STAT3 | 22454119  | 22454580  | 1,23 | ENSRNOG00000001980  | Ugt2b36    |
| P-STAT3 | 26618182  | 26619045  | 1,06 | ENSRNOG00000001912  | Srd5a2l2   |
| P-STAT3 | 33150194  | 33150834  | 1,17 | ENSRNOG00000002074  | Rest       |
| P-STAT3 | 37755650  | 37756895  | 0,95 | ENSRNOG00000002278  | Tec        |
| P-STAT3 | 38110147  | 38110676  | 1,34 | ENSRNOG00000002302  | CORIN_RAT  |
| P-STAT3 | 39046730  | 39047074  | 1,29 | ENSRNOG00000002336  | Gabra4     |
| P-STAT3 | 39047511  | 39047964  | 1,29 | ENSRNOG00000002336  | Gabra4     |
| P-STAT3 | 39568439  | 39569179  | 1,12 | ENSRNOG00000002349  | Gabra2     |
| P-STAT3 | 81355990  | 81356337  | 1,51 | ENSRNOG00000009572  | Hgfac      |
| P-STAT3 | 81356681  | 81357332  | 1,45 | ENSRNOG00000009572  | Hgfac      |
| P-STAT3 | 82762989  | 82764175  | 1,01 | ENSRNOG00000017259  | Tacc3      |
| P-STAT3 | 82762989  | 82764175  | 1,01 | ENSRNOG00000037162  | Slbp       |
| P-STAT3 | 82764831  | 82765395  | 1,45 | ENSRNOG00000037162  | Slbp       |
| P-STAT3 | 82764831  | 82765395  | 1,45 | ENSRNOG00000017259  | Tacc3      |
| P-STAT3 | 85607612  | 85608456  | 1,4  | ENSRNOG00000008716  | Nefh       |
| P-STAT3 | 89542380  | 89543025  | 1,23 | ENSRNOG00000005141  | Hus1       |
| P-STAT3 | 92358110  | 92359443  | 0,95 | ENSRNOG00000037621  | RGD1309870 |
| P-STAT3 | 97908319  | 97908753  | 1,23 | ENSRNOG00000005326  | Cnrip1     |
| P-STAT3 | 104449284 | 104450073 | 1,12 | ENSRNOG00000037532  | LOC690352  |
| P-STAT3 | 104574275 | 104574849 | 1,12 | ENSRNOG00000005601  | Pex13      |
| P-STAT3 | 110169035 | 110169664 | 1,12 | ENSRNOG00000003712  | Smek2      |
| P-STAT3 | 3786497   | 3787257   | 1,23 | ENSRNOG00000027171  | Ndst2      |
| P-STAT3 | 3866452   | 3867121   | 1,23 | ENSRNOG00000040122  | Myoz1      |
| P-STAT3 | 18685284  | 18685928  | 1,4  | ENSRNOG00000007817  | Kctd6      |
| P-STAT3 | 19081536  | 19081990  | 1,18 | ENSRNOG00000009470  | Flnb       |
| P-STAT3 | 21571975  | 21572607  | 1,12 | ENSRNOG00000009481  | Ddhd1      |
| P-STAT3 | 22615266  | 22615613  | 1,68 | ENSRNOG00000009785  | B2RZ50_RAT |
| P-STAT3 | 27347451  | 27347993  | 1,12 | ENSRNOG00000010389  | Ndrp2      |
| P-STAT3 | 27347451  | 27347993  | 1,12 | ENSRNOG00000025473  | Tppp2      |

|         |          |          |      |                    |             |
|---------|----------|----------|------|--------------------|-------------|
| P-STAT3 | 33037443 | 33038097 | 1,29 | ENSRNOG00000016828 | Cmtm5       |
| P-STAT3 | 33067146 | 33067901 | 1,29 | ENSRNOG00000025757 | Myh6        |
| P-STAT3 | 33722850 | 33723279 | 1,23 | ENSRNOG00000019438 | Rnf31       |
| P-STAT3 | 33722850 | 33723279 | 1,23 | ENSRNOG00000019162 | Fam158a     |
| P-STAT3 | 33754268 | 33754622 | 1,23 | ENSRNOG00000019503 | Rec8        |
| P-STAT3 | 33948131 | 33949275 | 1,29 | ENSRNOG00000020401 | Adcy4       |
| P-STAT3 | 33955429 | 33956460 | 1,18 | ENSRNOG00000020465 | Ripk3       |
| P-STAT3 | 34028806 | 34029260 | 1,23 | ENSRNOG00000020503 | Cbln3       |
| P-STAT3 | 34028806 | 34029260 | 1,23 | ENSRNOG00000020506 | RGD1565688  |
| P-STAT3 | 42091635 | 42091887 | 1,4  | ENSRNOG00000010042 | Wdfy2       |
| P-STAT3 | 45379907 | 45380459 | 1,23 | ENSRNOG00000016177 | Scara3      |
| P-STAT3 | 46173050 | 46173621 | 1,34 | ENSRNOG00000009522 | Adra1a<i><s |
| P-STAT3 | 46779725 | 46780081 | 1,29 | ENSRNOG00000011548 | Ebf2        |
| P-STAT3 | 49848542 | 49849097 | 1,34 | ENSRNOG00000015495 | Slc25a37    |
| P-STAT3 | 50183680 | 50184344 | 1,23 | ENSRNOG00000017373 | Rhobtb2     |
| P-STAT3 | 53651205 | 53651964 | 1,46 | ENSRNOG00000015042 | Cysltr2     |
| P-STAT3 | 61060647 | 61061419 | 1,01 | ENSRNOG00000013101 | Pcdh8       |
| P-STAT3 | 70770100 | 70770346 | 1,34 | ENSRNOG00000013306 | Pcdh20      |
| P-STAT3 | 79774249 | 79774850 | 1,23 | ENSRNOG00000031100 | Klhl1       |
| P-STAT3 | 82881120 | 82882168 | 1,12 | ENSRNOG00000009125 | Dis3        |
| P-STAT3 | 82881120 | 82882168 | 1,12 | ENSRNOG00000009208 | Pibf1       |
| P-STAT3 | 90012687 | 90013726 | 1,18 | ENSRNOG00000010058 | Spry2       |
| P-STAT3 | 6311700  | 6312254  | 1,29 | ENSRNOG00000017369 | Mustn1      |
| P-STAT3 | 6556080  | 6556419  | 1,24 | ENSRNOG00000018358 | Nt5dc2      |
| P-STAT3 | 7480639  | 7480978  | 1,52 | ENSRNOG00000019718 | Galntl2     |
| P-STAT3 | 17687052 | 17687391 | 1,35 | ENSRNOG00000011912 | Tmem38a     |
| P-STAT3 | 18634358 | 18636392 | 1,12 | ENSRNOG00000017552 | Mrpl34      |
| P-STAT3 | 18634358 | 18636392 | 1,12 | ENSRNOG00000039417 | Dda1        |
| P-STAT3 | 18634358 | 18636392 | 1,12 | ENSRNOG00000000054 | Abhd8       |
| P-STAT3 | 18726315 | 18726684 | 1,52 | ENSRNOG00000017949 | Fam125a     |
| P-STAT3 | 18808764 | 18809310 | 1,24 | ENSRNOG00000023317 | Glt25d1     |
| P-STAT3 | 19166824 | 19167771 | 1,01 | ENSRNOG00000019228 | Pik3r2      |
| P-STAT3 | 19397188 | 19398637 | 0,9  | ENSRNOG00000019824 | Eil         |
| P-STAT3 | 19457826 | 19458080 | 1,29 | ENSRNOG00000020088 | Klhl26      |
| P-STAT3 | 22241718 | 22242267 | 1,29 | ENSRNOG00000011826 | Lzts1       |
| P-STAT3 | 24920812 | 24921385 | 1,35 | ENSRNOG00000014185 | Tktl2       |
| P-STAT3 | 25498673 | 25499027 | 1,35 | ENSRNOG00000026310 | 01-mar      |
| P-STAT3 | 36132882 | 36134078 | 1,18 | ENSRNOG00000013167 | RGD1564519  |
| P-STAT3 | 47624733 | 47625382 | 1,29 | ENSRNOG00000030889 | Cldn22      |
| P-STAT3 | 49084179 | 49084745 | 1,24 | ENSRNOG00000010633 | Acsl1       |
| P-STAT3 | 55387664 | 55388020 | 1,24 | ENSRNOG00000000109 | Fgf20       |
| P-STAT3 | 60564341 | 60564785 | 1,52 | ENSRNOG00000011474 | Ppp1r3b     |
| P-STAT3 | 70336133 | 70336472 | 1,41 | ENSRNOG00000014275 | Q7TQ77_RAT  |
| P-STAT3 | 80826258 | 80826803 | 1,24 | ENSRNOG00000026740 | LOC290876   |
| P-STAT3 | 80999448 | 80999782 | 1,57 | ENSRNOG00000018543 | Atp4b       |
| P-STAT3 | 81471500 | 81472751 | 1,18 | ENSRNOG00000028426 | Mcf2l       |
| P-STAT3 | 5521947  | 5523529  | 1,18 | ENSRNOG00000018489 | Olr1653     |
| P-STAT3 | 14832076 | 14833418 | 0,9  | ENSRNOG00000011423 | Pitx1       |
| P-STAT3 | 15150134 | 15151099 | 1,13 | ENSRNOG00000013564 | Dok3        |

|         |          |          |      |                    |             |
|---------|----------|----------|------|--------------------|-------------|
| P-STAT3 | 15152149 | 15152883 | 1,13 | ENSRNOG00000013564 | Dok3        |
| P-STAT3 | 15153249 | 15154423 | 1,18 | ENSRNOG00000013564 | Dok3        |
| P-STAT3 | 15349340 | 15350770 | 1,07 | ENSRNOG00000016539 | Q5BK70_RAT  |
| P-STAT3 | 16051506 | 16051865 | 1,35 | ENSRNOG00000017607 | Faf2        |
| P-STAT3 | 16232682 | 16233056 | 1,52 | ENSRNOG00000000104 | Thoc3       |
| P-STAT3 | 19999143 | 19999878 | 1,3  | ENSRNOG00000011119 | Spin1       |
| P-STAT3 | 37060338 | 37061487 | 1,13 | ENSRNOG00000039265 | LOC682709   |
| P-STAT3 | 37087092 | 37087746 | 1,24 | ENSRNOG00000017445 | Tubb2b      |
| P-STAT3 | 48513239 | 48513968 | 1,18 | ENSRNOG00000033233 | LOC684647   |
| P-STAT3 | 48513239 | 48513968 | 1,18 | ENSRNOG00000022146 | RGD1564767  |
| P-STAT3 | 48513239 | 48513968 | 1,18 | ENSRNOG00000032907 | LOC679950   |
| P-STAT3 | 50113270 | 50113892 | 1,24 | ENSRNOG00000030142 | Hist1h4b    |
| P-STAT3 | 50238413 | 50238979 | 1,24 | ENSRNOG00000017947 | Znf184      |
| P-STAT3 | 50360528 | 50361477 | 1,24 | ENSRNOG00000018073 | Hist1h1b    |
| P-STAT3 | 55016324 | 55016673 | 1,86 | ENSRNOG00000013454 | Rala        |
| P-STAT3 | 77776890 | 77777455 | 1,18 | ENSRNOG00000017967 | Asb13       |
| P-STAT3 | 78238974 | 78239507 | 1,24 | ENSRNOG00000018911 | Pfkfb3      |
| P-STAT3 | 87845570 | 87846118 | 1,35 | ENSRNOG00000018087 | Vim         |
| P-STAT3 | 92799770 | 92800337 | 1,24 | ENSRNOG00000022021 | Spag6l      |
| P-STAT3 | 2081544  | 2082387  | 1,01 | ENSRNOG00000029370 | Abhd3       |
| P-STAT3 | 11936265 | 11936594 | 1,84 | ENSRNOG00000039969 | Dsc2        |
| P-STAT3 | 26872809 | 26873169 | 1,29 | ENSRNOG00000025489 | Pkd2l2      |
| P-STAT3 | 29320206 | 29320955 | 1,01 | ENSRNOG00000017849 | Apbb3       |
| P-STAT3 | 29375120 | 29375972 | 1,12 | ENSRNOG00000042688 | RGD1563066  |
| P-STAT3 | 29375120 | 29375972 | 1,12 | ENSRNOG00000017819 | Cd14        |
| P-STAT3 | 29444139 | 29444494 | 1,34 | ENSRNOG00000017571 | Ndufa2      |
| P-STAT3 | 29444139 | 29444494 | 1,34 | ENSRNOG00000017251 | Ik          |
| P-STAT3 | 30106240 | 30106869 | 1,34 | ENSRNOG00000020095 | Pcdhb3      |
| P-STAT3 | 30641916 | 30642670 | 1,34 | ENSRNOG00000030352 | Pcdhga9     |
| P-STAT3 | 31176111 | 31177497 | 1,17 | ENSRNOG00000019276 | RGD735029   |
| P-STAT3 | 39559909 | 39561485 | 0,95 | ENSRNOG00000016675 | Kcnn2       |
| P-STAT3 | 40674327 | 40674677 | 1,34 | ENSRNOG00000003575 | Mospd4      |
| P-STAT3 | 40928216 | 40928655 | 1,23 | ENSRNOG00000000158 | Cdo1        |
| P-STAT3 | 44818458 | 44819214 | 1,06 | ENSRNOG00000024671 | Dmxf1       |
| P-STAT3 | 48639573 | 48639910 | 1,29 | ENSRNOG00000017832 | Snx2        |
| P-STAT3 | 48898184 | 48898833 | 1,29 | ENSRNOG00000017416 | Ppic        |
| P-STAT3 | 54347771 | 54348120 | 1,68 | ENSRNOG00000019733 | Slc27a6     |
| P-STAT3 | 56678887 | 56679736 | 1,68 | ENSRNOG00000019014 | Ndst1       |
| P-STAT3 | 63993308 | 63993962 | 1,23 | ENSRNOG00000017954 | Slmo1       |
| P-STAT3 | 77134010 | 77135149 | 1,34 | ENSRNOG00000042693 | LOC10019220 |
| P-STAT3 | 78873690 | 78874239 | 1,56 | ENSRNOG00000016654 | Galr1       |
| P-STAT3 | 78877231 | 78877655 | 2,24 | ENSRNOG00000016654 | Galr1       |
| P-STAT3 | 10165174 | 10165533 | 1,38 | ENSRNOG00000013216 | RGD1305215  |
| P-STAT3 | 10165174 | 10165533 | 1,38 | ENSRNOG00000013460 | Zfp319      |
| P-STAT3 | 10477246 | 10478988 | 1,11 | ENSRNOG00000014963 | GPR56_RAT   |
| P-STAT3 | 10618064 | 10618908 | 1,22 | ENSRNOG00000016190 | Coq9        |
| P-STAT3 | 10618064 | 10618908 | 1,22 | ENSRNOG00000016234 | Ciapi1      |
| P-STAT3 | 10642778 | 10643513 | 1    | ENSRNOG00000016278 | Ccl17       |
| P-STAT3 | 11302687 | 11303807 | 0,83 | ENSRNOG00000019004 | Mt4         |

|         |           |           |      |                    |            |
|---------|-----------|-----------|------|--------------------|------------|
| P-STAT3 | 11412261  | 11413204  | 0,94 | ENSRNOG00000042983 | CPSF5_RAT  |
| P-STAT3 | 11412261  | 11413204  | 0,94 | ENSRNOG00000019288 | Ogfod1     |
| P-STAT3 | 11908203  | 11908747  | 1,22 | ENSRNOG00000025710 | Ces7       |
| P-STAT3 | 13962281  | 13963407  | 1,22 | ENSRNOG00000014117 | Hmox1      |
| P-STAT3 | 19275182  | 19276348  | 1    | ENSRNOG00000013907 | Sall1      |
| P-STAT3 | 19696592  | 19697725  | 1    | ENSRNOG00000014124 | Nod2       |
| P-STAT3 | 23068144  | 23068478  | 1,88 | ENSRNOG00000017546 | Mylk3      |
| P-STAT3 | 25777156  | 25777681  | 1,22 | ENSRNOG00000006049 | Rfx1       |
| P-STAT3 | 26162298  | 26163444  | 0,83 | ENSRNOG00000004094 | Ptger1     |
| P-STAT3 | 26534772  | 26535666  | 1,22 | ENSRNOG00000003580 | Ucp1       |
| P-STAT3 | 35094193  | 35095258  | 0,94 | ENSRNOG00000015588 | Nol3       |
| P-STAT3 | 35105403  | 35105763  | 1,27 | ENSRNOG00000015625 | MGC116202  |
| P-STAT3 | 35119547  | 35120306  | 1,22 | ENSRNOG00000015800 | Elmo3      |
| P-STAT3 | 35535653  | 35537012  | 1,27 | ENSRNOG00000017867 | RGD1561415 |
| P-STAT3 | 35535653  | 35537012  | 1,27 | ENSRNOG00000038973 | Acd        |
| P-STAT3 | 35819997  | 35820729  | 1,22 | ENSRNOG00000019757 | Dpep3      |
| P-STAT3 | 36032844  | 36033268  | 1,38 | ENSRNOG00000019943 | Slc7a6     |
| P-STAT3 | 40675573  | 40676333  | 1    | ENSRNOG00000017602 | Il34       |
| P-STAT3 | 49920919  | 49921579  | 1,11 | ENSRNOG00000015904 | Wfdc1      |
| P-STAT3 | 51096811  | 51097993  | 0,83 | ENSRNOG00000017869 | Irf8       |
| P-STAT3 | 51099658  | 51100731  | 1,05 | ENSRNOG00000017869 | Irf8       |
| P-STAT3 | 54975859  | 54976624  | 1,27 | ENSRNOG00000019024 | Trim67     |
| P-STAT3 | 54976960  | 54977949  | 1    | ENSRNOG00000019024 | Trim67     |
| P-STAT3 | 55031119  | 55032074  | 1    | ENSRNOG00000019205 | Gnpat      |
| P-STAT3 | 55037199  | 55037848  | 1,11 | ENSRNOG00000019169 | RGD1562218 |
| P-STAT3 | 55265115  | 55266148  | 1    | ENSRNOG00000019779 | DISC1_RAT  |
| P-STAT3 | 23942525  | 23943663  | 0,89 | ENSRNOG00000011200 | Bhmt       |
| P-STAT3 | 23942525  | 23943663  | 0,89 | ENSRNOG00000033895 | Q6TUI3_RAT |
| P-STAT3 | 29258593  | 29259262  | 1,12 | ENSRNOG00000015472 | Tmem174    |
| P-STAT3 | 32674984  | 32676436  | 0,84 | ENSRNOG00000018903 | P85A_RAT   |
| P-STAT3 | 36434388  | 36434759  | 1,23 | ENSRNOG00000010254 | Htr1a      |
| P-STAT3 | 41675867  | 41676325  | 1,23 | ENSRNOG00000011623 | Rab3c      |
| P-STAT3 | 44180984  | 44181680  | 1,34 | ENSRNOG00000009980 | Ppap2a     |
| P-STAT3 | 45078371  | 45080212  | 1,51 | ENSRNOG00000010992 | Hspb3      |
| P-STAT3 | 46946272  | 46947036  | 1,17 | ENSRNOG00000011797 | Mocs2      |
| P-STAT3 | 48544183  | 48544731  | 1,28 | ENSRNOG00000031115 | LOC499530  |
| P-STAT3 | 55856795  | 55857239  | 1,23 | ENSRNOG00000013886 | Fyb        |
| P-STAT3 | 55859283  | 55859765  | 1,23 | ENSRNOG00000013886 | Fyb        |
| P-STAT3 | 95332118  | 95332866  | 1,34 | ENSRNOG00000011705 | Stmn2      |
| P-STAT3 | 96353949  | 96354279  | 1,34 | ENSRNOG00000011973 | Il7        |
| P-STAT3 | 96355328  | 96356697  | 1,01 | ENSRNOG00000011973 | Il7        |
| P-STAT3 | 105082020 | 105082370 | 1,23 | ENSRNOG00000011913 | Cp         |
| P-STAT3 | 115303360 | 115303721 | 1,23 | ENSRNOG00000028156 | Pld1       |
| P-STAT3 | 120326694 | 120327543 | 1,01 | ENSRNOG00000011938 | FXR1_RAT   |
| P-STAT3 | 123068417 | 123069574 | 1,01 | ENSRNOG00000015423 | Ccna2      |
| P-STAT3 | 142804367 | 142804831 | 1,23 | ENSRNOG00000013660 | Cog6       |
| P-STAT3 | 144014101 | 144014734 | 1,56 | ENSRNOG00000000091 | Smad9      |
| P-STAT3 | 157366975 | 157368131 | 0,95 | ENSRNOG00000037853 | Rarres1    |
| P-STAT3 | 163600811 | 163601569 | 1,12 | ENSRNOG00000031067 | SUIS_RAT   |

|         |           |           |      |                     |           |
|---------|-----------|-----------|------|---------------------|-----------|
| P-STAT3 | 173818153 | 173818608 | 1,23 | ENSRNOG00000012302  | Gucy1a3   |
| P-STAT3 | 174053387 | 174054135 | 1,12 | ENSRNOG00000012982  | Map9      |
| P-STAT3 | 174644891 | 174645345 | 1,23 | ENSRNOG00000025608  | Lrat      |
| P-STAT3 | 174645678 | 174646336 | 1,17 | ENSRNOG00000025608  | Lrat      |
| P-STAT3 | 180332005 | 180333059 | 1,45 | ENSRNOG00000019412  | Rhbg      |
| P-STAT3 | 180746335 | 180746815 | 1,28 | ENSRNOG00000020027  | Arhgef2   |
| P-STAT3 | 181249544 | 181250293 | 1,23 | ENSRNOG00000020500  | Clk2      |
| P-STAT3 | 181715916 | 181716985 | 0,95 | ENSRNOG00000020706  | Kcnn3     |
| P-STAT3 | 182494283 | 182494732 | 1,34 | ENSRNOG00000016138  | Crtc2     |
| P-STAT3 | 182649807 | 182651036 | 1,12 | ENSRNOG00000015421  | Slc27a3   |
| P-STAT3 | 182804237 | 182805217 | 1,12 | ENSRNOG00000012053  | S100a16   |
| P-STAT3 | 182882826 | 182883275 | 1,28 | ENSRNOG00000011821  | S100a4    |
| P-STAT3 | 192460487 | 192461251 | 1,51 | ENSRNOG00000018076  | Fmo5      |
| P-STAT3 | 198164065 | 198164694 | 1,28 | ENSRNOG00000016835  | Sycp1     |
| P-STAT3 | 198960464 | 198960897 | 1,34 | ENSRNOG00000019211  | Olfml3    |
| P-STAT3 | 203510594 | 203511061 | 1,51 | ENSRNOG00000019017  | Gstm6     |
| P-STAT3 | 203610163 | 203611077 | 1,06 | ENSRNOG00000019221  | Gstm4     |
| P-STAT3 | 203610163 | 203611077 | 1,06 | ENSRNOG00000034838  | SNORD47   |
| P-STAT3 | 209625941 | 209627081 | 1,17 | ENSRNOG00000017310  | Rnpc3     |
| P-STAT3 | 219288320 | 219288860 | 1,28 | ENSRNOG00000013798  | Fnbp1l    |
| P-STAT3 | 225185229 | 225185666 | 1,4  | ENSRNOG00000010875  | LOC691931 |
| P-STAT3 | 226576903 | 226577442 | 1,23 | ENSRNOG00000010681  | Pitx2     |
| P-STAT3 | 238984385 | 238984731 | 1,4  | ENSRNOG00000016223  | Pdha2     |
| P-STAT3 | 243152711 | 243153272 | 1,23 | ENSRNOG00000014059  | Odf2l     |
| P-STAT3 | 244431610 | 244432064 | 1,34 | ENSRNOG00000015260  | Lpar3     |
| P-STAT3 | 244648339 | 244649090 | 1,12 | ENSRNOG00000015573  | Ctbs      |
| P-STAT3 | 244848918 | 244849366 | 1,23 | ENSRNOG00000016432  | LOC56764  |
| P-STAT3 | 252239436 | 252240891 | 1,45 | ENSRNOG00000028348  | Lhx8      |
| P-STAT3 | 646797    | 648231    | 1,06 | ENSRNOG00000000749  | Olr1693   |
| P-STAT3 | 1333989   | 1335231   | 1,22 | ENSRNOG00000028849  | Olr1734   |
| P-STAT3 | 1416243   | 1416789   | 1,33 | ENSRNOG00000000763  | RT1-M3-1  |
| P-STAT3 | 1461573   | 1462012   | 1,39 | ENSRNOG00000029420  | Olr1744   |
| P-STAT3 | 1793649   | 1794783   | 1,06 | ENSRNOG00000000782  | Trim10    |
| P-STAT3 | 1793649   | 1794783   | 1,06 | ENSRNOG000000031689 | Trim15    |
| P-STAT3 | 2102985   | 2104214   | 1,72 | ENSRNOG00000000786  | Rpp21     |
| P-STAT3 | 2645168   | 2645820   | 1,28 | ENSRNOG00000042949  | LOC684097 |
| P-STAT3 | 2806910   | 2807385   | 1,33 | ENSRNOG00000000795  | RT1-N3    |
| P-STAT3 | 3025493   | 3025936   | 1,45 | ENSRNOG00000030157  | Dhx16     |
| P-STAT3 | 3226495   | 3227124   | 1,22 | ENSRNOG00000000833  | Vars2     |
| P-STAT3 | 3632256   | 3632790   | 1,28 | ENSRNOG00000000840  | Atp6v1g2  |
| P-STAT3 | 3657265   | 3657823   | 1,17 | ENSRNOG00000000838  | Lta       |
| P-STAT3 | 3657265   | 3657823   | 1,17 | ENSRNOG00000000837  | Tnf       |
| P-STAT3 | 3658516   | 3658883   | 1,45 | ENSRNOG00000000838  | Lta       |
| P-STAT3 | 3658516   | 3658883   | 1,45 | ENSRNOG00000000837  | Tnf       |
| P-STAT3 | 3660724   | 3661863   | 1,17 | ENSRNOG00000000837  | Tnf       |
| P-STAT3 | 3711602   | 3712747   | 1    | ENSRNOG00000000854  | Ncr3      |
| P-STAT3 | 3711602   | 3712747   | 1    | ENSRNOG00000000853  | Aif1      |
| P-STAT3 | 3724448   | 3725498   | 1,33 | ENSRNOG00000000852  | Bat2      |
| P-STAT3 | 3724448   | 3725498   | 1,33 | ENSRNOG00000034497  | SNORA38   |

|         |          |          |      |                    |            |
|---------|----------|----------|------|--------------------|------------|
| P-STAT3 | 3755184  | 3755738  | 1,28 | ENSRNOG00000000851 | Bat3       |
| P-STAT3 | 3755184  | 3755738  | 1,28 | ENSRNOG00000000850 | Apom       |
| P-STAT3 | 3767767  | 3768929  | 1    | ENSRNOG00000027516 | Ly6g5b     |
| P-STAT3 | 3767767  | 3768929  | 1    | ENSRNOG00000000848 | Bat4       |
| P-STAT3 | 3809416  | 3810351  | 1,17 | ENSRNOG00000027157 | Ly6g6e     |
| P-STAT3 | 3809416  | 3810351  | 1,17 | ENSRNOG00000000844 | Ly6g6d     |
| P-STAT3 | 3830701  | 3831649  | 1,17 | ENSRNOG00000000842 | Ddah2      |
| P-STAT3 | 3874151  | 3875000  | 1,39 | ENSRNOG00000000860 | G7c        |
| P-STAT3 | 3876376  | 3878152  | 1,06 | ENSRNOG00000000860 | G7c        |
| P-STAT3 | 4201206  | 4201955  | 1,72 | ENSRNOG00000000432 | Fkbpl      |
| P-STAT3 | 4201206  | 4201955  | 1,72 | ENSRNOG00000000431 | Atf6b      |
| P-STAT3 | 4255661  | 4256395  | 1,22 | ENSRNOG00000000439 | Ager       |
| P-STAT3 | 4300643  | 4301792  | 0,95 | ENSRNOG00000030729 | Q6MG90_RAT |
| P-STAT3 | 4797743  | 4798292  | 1,39 | ENSRNOG00000000459 | Psmb9      |
| P-STAT3 | 4804166  | 4805000  | 1,28 | ENSRNOG00000000457 | Tap1       |
| P-STAT3 | 5093593  | 5094032  | 1,39 | ENSRNOG00000000473 | Pfdn6      |
| P-STAT3 | 5119401  | 5120349  | 1,22 | ENSRNOG00000029500 | Tapbp      |
| P-STAT3 | 5119401  | 5120349  | 1,22 | ENSRNOG00000000476 | Zbtb22     |
| P-STAT3 | 5123427  | 5124276  | 1,17 | ENSRNOG00000000476 | Zbtb22     |
| P-STAT3 | 5440710  | 5441148  | 1,33 | ENSRNOG00000025864 | Q4KM57_RAT |
| P-STAT3 | 5942145  | 5942774  | 1,22 | ENSRNOG00000000491 | Spdef      |
| P-STAT3 | 7815591  | 7816424  | 1,17 | ENSRNOG00000000529 | Pim1       |
| P-STAT3 | 8031412  | 8031860  | 1,22 | ENSRNOG00000000531 | LOC689755  |
| P-STAT3 | 10293612 | 10294745 | 1,22 | ENSRNOG00000001189 | Snf1lk     |
| P-STAT3 | 11222439 | 11223173 | 1,28 | ENSRNOG00000042636 | LOC687622  |
| P-STAT3 | 11266965 | 11267640 | 1,5  | ENSRNOG00000042797 | LOC690460  |
| P-STAT3 | 12601902 | 12603041 | 1,06 | ENSRNOG00000012714 | RGD1564149 |
| P-STAT3 | 12604182 | 12604536 | 1,28 | ENSRNOG00000012714 | RGD1564149 |
| P-STAT3 | 12604182 | 12604536 | 1,28 | ENSRNOG00000001276 | Pcnt       |
| P-STAT3 | 13192509 | 13192881 | 1,28 | ENSRNOG00000006589 | Mif        |
| P-STAT3 | 14173068 | 14173322 | 1,28 | ENSRNOG00000001313 | Gnaz       |
| P-STAT3 | 25410033 | 25410372 | 1,39 | ENSRNOG00000000386 | Pbld       |
| P-STAT3 | 28721687 | 28722258 | 1,61 | ENSRNOG00000000561 | Pald       |
| P-STAT3 | 29518717 | 29519471 | 1,17 | ENSRNOG00000024413 | Neurog3    |
| P-STAT3 | 29836337 | 29837576 | 1    | ENSRNOG00000000395 | LOC606294  |
| P-STAT3 | 44526003 | 44527232 | 1    | ENSRNOG00000000583 | Cdc216     |
| P-STAT3 | 47081052 | 47081486 | 1,22 | ENSRNOG00000000316 | Sobp       |
| P-STAT3 | 47081052 | 47081486 | 1,22 | ENSRNOG00000026080 | LOC688390  |
| P-STAT3 | 3256045  | 3256408  | 1,91 | ENSRNOG00000009286 | Noxa1      |
| P-STAT3 | 3378623  | 3378968  | 1,63 | ENSRNOG00000010019 | Fam166a    |
| P-STAT3 | 3378623  | 3378968  | 1,63 | ENSRNOG00000009377 | Cobra1     |
| P-STAT3 | 3562814  | 3564073  | 1,01 | ENSRNOG00000013102 | Entpd2     |
| P-STAT3 | 3570430  | 3571949  | 0,95 | ENSRNOG00000013895 | Npdc1      |
| P-STAT3 | 3637420  | 3637749  | 1,35 | ENSRNOG00000015550 | Ptgds      |
| P-STAT3 | 3675613  | 3677356  | 1,29 | ENSRNOG00000028701 | C8g        |
| P-STAT3 | 3793834  | 3794262  | 1,29 | ENSRNOG00000017044 | LOC499754  |
| P-STAT3 | 3793834  | 3794262  | 1,29 | ENSRNOG00000028254 | Tmem141    |
| P-STAT3 | 4558676  | 4559530  | 1,12 | ENSRNOG00000026775 | Pmpca      |
| P-STAT3 | 5199123  | 5200771  | 0,9  | ENSRNOG00000008810 | Nelf       |

|         |          |          |      |                     |            |
|---------|----------|----------|------|---------------------|------------|
| P-STAT3 | 5803952  | 5804294  | 1,68 | ENSRNOG00000005031  | Surf6      |
| P-STAT3 | 5803952  | 5804294  | 1,68 | ENSRNOG00000005071  | RGD1563311 |
| P-STAT3 | 5803952  | 5804294  | 1,68 | ENSRNOG000000035951 | SNORD24    |
| P-STAT3 | 5807544  | 5808305  | 1,29 | ENSRNOG00000005059  | Med22      |
| P-STAT3 | 5807544  | 5808305  | 1,29 | ENSRNOG00000005071  | RGD1563311 |
| P-STAT3 | 5807544  | 5808305  | 1,29 | ENSRNOG000000035951 | SNORD24    |
| P-STAT3 | 5807544  | 5808305  | 1,29 | ENSRNOG000000036176 | snR47      |
| P-STAT3 | 5807544  | 5808305  | 1,29 | ENSRNOG000000034505 | SNORD36    |
| P-STAT3 | 5807544  | 5808305  | 1,29 | ENSRNOG000000044935 | SNORD36    |
| P-STAT3 | 5903402  | 5904366  | 1,01 | ENSRNOG00000005840  | RGD1311501 |
| P-STAT3 | 6822649  | 6823088  | 1,24 | ENSRNOG00000008749  | Col5a1     |
| P-STAT3 | 7455080  | 7456324  | 1,07 | ENSRNOG00000010164  | Mrps2      |
| P-STAT3 | 7455080  | 7456324  | 1,07 | ENSRNOG00000010152  | RGD1306233 |
| P-STAT3 | 10988162 | 10988611 | 1,29 | ENSRNOG00000009769  | Lamc3      |
| P-STAT3 | 11292356 | 11293023 | 1,4  | ENSRNOG00000010217  | Bat2l      |
| P-STAT3 | 11513992 | 11514744 | 1,29 | ENSRNOG00000013973  | Lcn2       |
| P-STAT3 | 11949286 | 11950918 | 1,18 | ENSRNOG000000022312 | Lrsam1     |
| P-STAT3 | 11949286 | 11950918 | 1,18 | ENSRNOG000000016220 | LOC499782  |
| P-STAT3 | 11949286 | 11950918 | 1,18 | ENSRNOG000000034563 | SNORA65    |
| P-STAT3 | 13845881 | 13846440 | 1,4  | ENSRNOG000000018687 | Fbxw2      |
| P-STAT3 | 14357558 | 14358110 | 1,12 | ENSRNOG000000018991 | GELS_RAT   |
| P-STAT3 | 15341313 | 15342572 | 1,52 | ENSRNOG000000007415 | Ptgs1      |
| P-STAT3 | 15827978 | 15828327 | 1,29 | ENSRNOG000000029701 | Olr401     |
| P-STAT3 | 16445154 | 16445416 | 1,52 | ENSRNOG000000007962 | Olr419     |
| P-STAT3 | 16610819 | 16611183 | 1,68 | ENSRNOG000000007986 | Olr425     |
| P-STAT3 | 17190569 | 17191324 | 1,18 | ENSRNOG000000009340 | Zbtb6      |
| P-STAT3 | 32958213 | 32958591 | 1,29 | ENSRNOG000000004673 | Rbm43      |
| P-STAT3 | 37067341 | 37067915 | 1,12 | ENSRNOG000000005369 | Kcnj3      |
| P-STAT3 | 40101759 | 40102128 | 1,35 | ENSRNOG000000004828 | Acvr1c     |
| P-STAT3 | 41918888 | 41919753 | 1,01 | ENSRNOG000000006241 | 07-mar     |
| P-STAT3 | 44615005 | 44615557 | 1,24 | ENSRNOG000000007359 | Gca        |
| P-STAT3 | 51813378 | 51813711 | 1,24 | ENSRNOG000000007461 | Kbtbd10    |
| P-STAT3 | 52789672 | 52790217 | 1,24 | ENSRNOG000000000007 | Gad1       |
| P-STAT3 | 57325071 | 57325709 | 1,29 | ENSRNOG000000001578 | Hoxd4      |
| P-STAT3 | 69095329 | 69095970 | 1,24 | ENSRNOG000000029632 | Olr463     |
| P-STAT3 | 69114110 | 69115039 | 1,18 | ENSRNOG000000009634 | Olr465     |
| P-STAT3 | 69165155 | 69165509 | 1,24 | ENSRNOG000000009659 | Olr468     |
| P-STAT3 | 69382834 | 69383494 | 1,12 | ENSRNOG000000009744 | Olr484     |
| P-STAT3 | 69397534 | 69397986 | 1,24 | ENSRNOG000000009747 | Olr485     |
| P-STAT3 | 69585789 | 69586479 | 1,35 | ENSRNOG000000033333 | Olr499     |
| P-STAT3 | 69750403 | 69750980 | 1,29 | ENSRNOG000000032960 | Olr510     |
| P-STAT3 | 69855746 | 69856446 | 1,12 | ENSRNOG000000032722 | Olr515     |
| P-STAT3 | 69965815 | 69967105 | 1,07 | ENSRNOG000000029222 | Olr518     |
| P-STAT3 | 70400542 | 70401440 | 1,12 | ENSRNOG000000043454 | Olr535     |
| P-STAT3 | 71330826 | 71332198 | 1,01 | ENSRNOG000000032163 | Olr575     |
| P-STAT3 | 71340054 | 71341224 | 1,24 | ENSRNOG000000010127 | Olr576     |
| P-STAT3 | 71355088 | 71355568 | 1,24 | ENSRNOG000000021658 | Olr577     |
| P-STAT3 | 71625881 | 71626839 | 1,12 | ENSRNOG000000031257 | Olr595     |
| P-STAT3 | 71907791 | 71908230 | 1,24 | ENSRNOG000000005950 | Olr608     |

|         |           |           |      |                     |            |
|---------|-----------|-----------|------|---------------------|------------|
| P-STAT3 | 71947048  | 71947499  | 1,35 | ENSRNOG00000005966  | Olr610     |
| P-STAT3 | 72152347  | 72153501  | 1,12 | ENSRNOG000000032423 | Olr623     |
| P-STAT3 | 72320923  | 72322115  | 1,18 | ENSRNOG00000006024  | Olr630     |
| P-STAT3 | 72731396  | 72732359  | 0,95 | ENSRNOG000000028917 | Olr651     |
| P-STAT3 | 73451940  | 73453085  | 1,12 | ENSRNOG000000033104 | Olr681     |
| P-STAT3 | 73572427  | 73572778  | 1,52 | ENSRNOG000000030125 | Olr689     |
| P-STAT3 | 74035951  | 74036604  | 1,29 | ENSRNOG000000030804 | Olr709     |
| P-STAT3 | 75210262  | 75210918  | 1,24 | ENSRNOG000000008682 | Mtch2      |
| P-STAT3 | 78420912  | 78421344  | 1,63 | ENSRNOG000000021678 | Alkbh3     |
| P-STAT3 | 90076052  | 90076491  | 1,4  | ENSRNOG000000012262 | Depdc7     |
| P-STAT3 | 90629117  | 90630068  | 0,9  | ENSRNOG000000013437 | LOC691083  |
| P-STAT3 | 96849452  | 96849996  | 1,57 | ENSRNOG000000004920 | Olr750     |
| P-STAT3 | 97182695  | 97183357  | 1,35 | ENSRNOG000000032543 | Olr768     |
| P-STAT3 | 97233991  | 97234300  | 1,4  | ENSRNOG000000026885 | Olr771     |
| P-STAT3 | 103434302 | 103434860 | 2,25 | ENSRNOG000000005404 | Rasgrp1    |
| P-STAT3 | 105745270 | 105745704 | 1,24 | ENSRNOG000000012648 | Ppp1r14d   |
| P-STAT3 | 106528886 | 106530419 | 1,35 | ENSRNOG000000007447 | Pla2g4b    |
| P-STAT3 | 107931405 | 107932167 | 1,35 | ENSRNOG000000043002 | Lcmt2      |
| P-STAT3 | 107931405 | 107932167 | 1,35 | ENSRNOG000000012166 | Q5FVI8_RAT |
| P-STAT3 | 108150494 | 108151138 | 1,57 | ENSRNOG000000014436 | Hisppd2a   |
| P-STAT3 | 109092452 | 109093286 | 1,12 | ENSRNOG000000018005 | Duoxa1     |
| P-STAT3 | 109092452 | 109093286 | 1,12 | ENSRNOG000000033348 | DUOX1_RAT  |
| P-STAT3 | 114072460 | 114073008 | 1,35 | ENSRNOG000000010128 | S27A2_RAT  |
| P-STAT3 | 116566831 | 116567532 | 1,35 | ENSRNOG000000017647 | Zc3h8      |
| P-STAT3 | 118911956 | 118912223 | 1,4  | ENSRNOG000000021249 | RGD1561852 |
| P-STAT3 | 128935397 | 128935973 | 1,29 | ENSRNOG000000004874 | Flrt3      |
| P-STAT3 | 137150813 | 137151445 | 1,12 | ENSRNOG000000004641 | Sstr4      |
| P-STAT3 | 137654908 | 137655657 | 0,95 | ENSRNOG000000005195 | Cst3       |
| P-STAT3 | 142327749 | 142328382 | 1,35 | ENSRNOG000000005118 | Fam110a    |
| P-STAT3 | 142329738 | 142330780 | 0,9  | ENSRNOG000000005118 | Fam110a    |
| P-STAT3 | 142787818 | 142788553 | 1,46 | ENSRNOG000000023477 | Defb23     |
| P-STAT3 | 143503341 | 143503716 | 1,68 | ENSRNOG000000009406 | Tm9sf4     |
| P-STAT3 | 143577188 | 143577818 | 1,24 | ENSRNOG000000026770 | Tsply3     |
| P-STAT3 | 145755273 | 145755937 | 1,29 | ENSRNOG000000041537 | U2         |
| P-STAT3 | 145755273 | 145755937 | 1,29 | ENSRNOG000000025443 | Map1lc3a   |
| P-STAT3 | 146550188 | 146550837 | 1,24 | ENSRNOG000000019736 | Nfs1       |
| P-STAT3 | 146550188 | 146550837 | 1,24 | ENSRNOG000000019823 | LOC679572  |
| P-STAT3 | 146550188 | 146550837 | 1,24 | ENSRNOG000000032925 | Q6GVH0_RAT |
| P-STAT3 | 148861731 | 148862380 | 1,18 | ENSRNOG000000012956 | Tgm2       |
| P-STAT3 | 154407217 | 154408211 | 1,46 | ENSRNOG000000027432 | R3hdml     |
| P-STAT3 | 154771142 | 154771991 | 1,12 | ENSRNOG000000010816 | Kcnk15     |
| P-STAT3 | 155162605 | 155163269 | 1,18 | ENSRNOG000000028779 | Wfdc15b    |
| P-STAT3 | 155464469 | 155464843 | 1,4  | ENSRNOG000000014297 | Sdc4       |
| P-STAT3 | 155579096 | 155579845 | 1,68 | ENSRNOG000000014739 | Wfdc2      |
| P-STAT3 | 155796999 | 155797473 | 1,29 | ENSRNOG000000015131 | Ube2c      |
| P-STAT3 | 155807149 | 155807913 | 1,29 | ENSRNOG000000015155 | Tnnc2      |
| P-STAT3 | 155985167 | 155986237 | 1,24 | ENSRNOG000000017539 | Mmp9       |
| P-STAT3 | 158448351 | 158448817 | 1,91 | ENSRNOG000000008283 | B4galt5    |
| P-STAT3 | 158639959 | 158641303 | 1,12 | ENSRNOG000000009207 | Spata2     |

|         |           |           |      |                     |            |
|---------|-----------|-----------|------|---------------------|------------|
| P-STAT3 | 158821941 | 158822390 | 1,97 | ENSRNOG00000025114  | Cebpb      |
| P-STAT3 | 159447684 | 159448337 | 1,12 | ENSRNOG00000012144  | Kcng1      |
| P-STAT3 | 162920888 | 162921947 | 1,01 | ENSRNOG00000004372  | Cbln4      |
| P-STAT3 | 163158396 | 163158947 | 1,4  | ENSRNOG00000004451  | Mc3r       |
| P-STAT3 | 165032129 | 165032675 | 1,01 | ENSRNOG00000028384  | Npepl1     |
| P-STAT3 | 463017    | 463662    | 1,84 | ENSRNOG00000010278  | Il6        |
| P-STAT3 | 2716496   | 2717327   | 0,95 | ENSRNOG00000007066  | Htr5a      |
| P-STAT3 | 5928457   | 5928791   | 1,22 | ENSRNOG00000010077  | Smarcd3    |
| P-STAT3 | 6009873   | 6010627   | 1,22 | ENSRNOG00000024885  | Asb10      |
| P-STAT3 | 6190265   | 6192088   | 1,11 | ENSRNOG00000009872  | Kcnh2      |
| P-STAT3 | 9233808   | 9234183   | 1,22 | ENSRNOG00000012932  | LOC499980  |
| P-STAT3 | 9236041   | 9236590   | 1,34 | ENSRNOG00000012932  | LOC499980  |
| P-STAT3 | 22711088  | 22711547  | 1,39 | ENSRNOG00000008602  | Steap4     |
| P-STAT3 | 39149838  | 39150787  | 1,11 | ENSRNOG00000031207  | LOC500035  |
| P-STAT3 | 47542308  | 47542760  | 1,56 | ENSRNOG00000029610  | Kcnd2      |
| P-STAT3 | 50657299  | 50658160  | 1,11 | ENSRNOG00000005698  | Ndufa5     |
| P-STAT3 | 50657299  | 50658160  | 1,11 | ENSRNOG00000006365  | Q4V8G1_RAT |
| P-STAT3 | 56228010  | 56228969  | 1,06 | ENSRNOG00000006197  | Calu       |
| P-STAT3 | 70901864  | 70902927  | 1    | ENSRNOG00000005444  | LOC502758  |
| P-STAT3 | 70970938  | 70971488  | 1,22 | ENSRNOG000000031828 | Olr820     |
| P-STAT3 | 76078282  | 76079017  | 1    | ENSRNOG000000026874 | RGD1304879 |
| P-STAT3 | 76528772  | 76529316  | 1,22 | ENSRNOG000000007707 | Znf467     |
| P-STAT3 | 76528772  | 76529316  | 1,22 | ENSRNOG000000025848 | Sspo       |
| P-STAT3 | 78037579  | 78038310  | 1,34 | ENSRNOG000000009768 | Npy        |
| P-STAT3 | 80542537  | 80544462  | 0,84 | ENSRNOG000000042748 | RGD1564419 |
| P-STAT3 | 83088398  | 83088848  | 1,56 | ENSRNOG00000010205  | MGC95152   |
| P-STAT3 | 85999570  | 86000124  | 1,45 | ENSRNOG000000030230 | V1rc20     |
| P-STAT3 | 86171555  | 86172401  | 1,11 | ENSRNOG000000006436 | Spty2d1    |
| P-STAT3 | 86171555  | 86172401  | 1,11 | ENSRNOG000000031323 | V1rc6      |
| P-STAT3 | 89723661  | 89724628  | 1,11 | ENSRNOG000000008656 | Snca       |
| P-STAT3 | 96419087  | 96420039  | 1,11 | ENSRNOG000000030085 | V1rc15     |
| P-STAT3 | 97804393  | 97804937  | 1,17 | ENSRNOG000000007740 | Tacstd2    |
| P-STAT3 | 104145203 | 104146635 | 0,95 | ENSRNOG000000006491 | RGD1561816 |
| P-STAT3 | 105746502 | 105747384 | 1,22 | ENSRNOG00000013520  | RGD1560523 |
| P-STAT3 | 117529952 | 117530485 | 1,28 | ENSRNOG00000010833  | Mthfd2     |
| P-STAT3 | 120884253 | 120885102 | 1,11 | ENSRNOG00000017838  | Q5I287_RAT |
| P-STAT3 | 125656073 | 125657106 | 1,11 | ENSRNOG000000022466 | Chchd4     |
| P-STAT3 | 125656073 | 125657106 | 1,11 | ENSRNOG000000007519 | Tmem43     |
| P-STAT3 | 125874313 | 125875244 | 1,17 | ENSRNOG000000009019 | Slc6a6     |
| P-STAT3 | 126001233 | 126001681 | 1,84 | ENSRNOG000000009726 | Grip2      |
| P-STAT3 | 142099098 | 142100141 | 1,11 | ENSRNOG000000005954 | Il5ra      |
| P-STAT3 | 148325927 | 148327616 | 1,11 | ENSRNOG000000005806 | Oxtr       |
| P-STAT3 | 149212345 | 149212689 | 1,56 | ENSRNOG000000009175 | Jagn1      |
| P-STAT3 | 149212345 | 149212689 | 1,56 | ENSRNOG000000035344 | U2         |
| P-STAT3 | 149371094 | 149372030 | 1,22 | ENSRNOG000000009414 | Creld1     |
| P-STAT3 | 149525117 | 149525378 | 1,28 | ENSRNOG00000010258  | Vhl        |
| P-STAT3 | 150245810 | 150246139 | 1,34 | ENSRNOG000000006527 | Slc6a1     |
| P-STAT3 | 152996523 | 152997174 | 1,5  | ENSRNOG000000023465 | LOC500300  |
| P-STAT3 | 158958933 | 158959402 | 1,78 | ENSRNOG00000015505  | Mfap5      |

|         |           |           |      |                    |            |
|---------|-----------|-----------|------|--------------------|------------|
| P-STAT3 | 159464203 | 159464841 | 1,39 | ENSRNOG00000010018 | Clec4a3    |
| P-STAT3 | 161445195 | 161445669 | 1,89 | ENSRNOG00000019368 | Scnn1a     |
| P-STAT3 | 162507307 | 162507765 | 1,11 | ENSRNOG00000019716 | Ntf3       |
| P-STAT3 | 163402711 | 163403342 | 1,73 | ENSRNOG00000019836 | Fgf6       |
| P-STAT3 | 166664629 | 166665329 | 1,39 | ENSRNOG00000037070 | Clec12b    |
| P-STAT3 | 167720257 | 167720634 | 1,34 | ENSRNOG00000033793 | LOC497796  |
| P-STAT3 | 168766729 | 168767309 | 1,22 | ENSRNOG00000033260 | Klra5      |
| P-STAT3 | 169610007 | 169610558 | 1,34 | ENSRNOG00000042164 | Sgp158     |
| P-STAT3 | 183287342 | 183287895 | 1,34 | ENSRNOG00000032967 | Tuba3b     |
| P-STAT3 | 183288632 | 183289895 | 1,11 | ENSRNOG00000032967 | Tuba3b     |
| P-STAT3 | 184558072 | 184559036 | 1    | ENSRNOG00000026864 | LOC690784  |
| P-STAT3 | 184636518 | 184637062 | 1,34 | ENSRNOG00000001840 | Rep15      |
| P-STAT3 | 185828342 | 185828794 | 1,34 | ENSRNOG00000001852 | RGD1310606 |
| P-STAT3 | 4843075   | 4844025   | 1,11 | ENSRNOG00000007892 | Tram1      |
| P-STAT3 | 9088781   | 9089332   | 1,39 | ENSRNOG00000006980 | Vcpip1     |
| P-STAT3 | 13637596  | 13638060  | 1,22 | ENSRNOG00000007640 | Npbwr1     |
| P-STAT3 | 14736314  | 14736663  | 1,66 | ENSRNOG00000008100 | Rgs20      |
| P-STAT3 | 14870233  | 14871692  | 1,11 | ENSRNOG00000022323 | Tcea1      |
| P-STAT3 | 16150326  | 16150675  | 1,33 | ENSRNOG00000027276 | Xkr4       |
| P-STAT3 | 19260642  | 19261201  | 1,39 | ENSRNOG00000009114 | Fam110b    |
| P-STAT3 | 19822709  | 19823540  | 1,11 | ENSRNOG00000009683 | Sdcbp      |
| P-STAT3 | 26046091  | 26046619  | 1,28 | ENSRNOG00000015562 | Cdh17      |
| P-STAT3 | 40302297  | 40302851  | 1,28 | ENSRNOG00000007680 | Fhl5       |
| P-STAT3 | 40934726  | 40935295  | 1,33 | ENSRNOG00000008475 | Fut9       |
| P-STAT3 | 51151122  | 51151568  | 1,33 | ENSRNOG00000008288 | Akirin2    |
| P-STAT3 | 57894760  | 57895232  | 1,22 | ENSRNOG00000042246 | LOC690918  |
| P-STAT3 | 58310248  | 58310973  | 1,39 | ENSRNOG00000008252 | Spink4     |
| P-STAT3 | 59192867  | 59193321  | 1,22 | ENSRNOG00000015068 | Il11ra1    |
| P-STAT3 | 59243402  | 59244189  | 1,28 | ENSRNOG00000034290 | Ccl21b     |
| P-STAT3 | 59524477  | 59525441  | 1,11 | ENSRNOG00000009535 | Stoml2     |
| P-STAT3 | 60040640  | 60041172  | 1,22 | ENSRNOG00000016452 | Creb3      |
| P-STAT3 | 60040640  | 60041172  | 1,22 | ENSRNOG00000016630 | Tln1       |
| P-STAT3 | 64096033  | 64096967  | 1,05 | ENSRNOG00000006369 | Alg2       |
| P-STAT3 | 64096033  | 64096967  | 1,05 | ENSRNOG00000006345 | Sec61b     |
| P-STAT3 | 65225894  | 65226470  | 1,28 | ENSRNOG00000008159 | RGD1308165 |
| P-STAT3 | 66424023  | 66424452  | 1,28 | ENSRNOG00000005368 | Ppp3r2     |
| P-STAT3 | 77263406  | 77264371  | 0,94 | ENSRNOG00000015644 | Ugcg       |
| P-STAT3 | 79402963  | 79403409  | 1,44 | ENSRNOG00000029785 | Cdc26      |
| P-STAT3 | 79402963  | 79403409  | 1,44 | ENSRNOG00000014777 | Prpf4      |
| P-STAT3 | 79466803  | 79467059  | 1,33 | ENSRNOG00000015105 | Bspry      |
| P-STAT3 | 80367127  | 80367486  | 1,33 | ENSRNOG00000008005 | Akna       |
| P-STAT3 | 106538671 | 106540120 | 1    | ENSRNOG00000008169 | Slc24a2    |
| P-STAT3 | 107734153 | 107734577 | 1,5  | ENSRNOG00000005772 | Ptplad2    |
| P-STAT3 | 126073361 | 126073915 | 1,22 | ENSRNOG00000007706 | Prkaa2     |
| P-STAT3 | 135351439 | 135352001 | 1,33 | ENSRNOG00000007775 | Cmpk1      |
| P-STAT3 | 137101179 | 137101534 | 1,78 | ENSRNOG00000017887 | Mutyh      |
| P-STAT3 | 138349732 | 138350271 | 1,78 | ENSRNOG00000019609 | B4galt2    |
| P-STAT3 | 138917277 | 138917630 | 1,22 | ENSRNOG00000028415 | Cdc20      |
| P-STAT3 | 139814167 | 139814620 | 1,22 | ENSRNOG00000007538 | Lepre1     |

|         |           |           |      |                    |            |
|---------|-----------|-----------|------|--------------------|------------|
| P-STAT3 | 141125039 | 141126017 | 1,5  | ENSRNOG00000009906 | Sifnl1     |
| P-STAT3 | 144018046 | 144019328 | 0,89 | ENSRNOG00000007174 | RGD1559610 |
| P-STAT3 | 144839743 | 144840469 | 1,11 | ENSRNOG00000008992 | GRIK3_RAT  |
| P-STAT3 | 145626308 | 145627417 | 1,22 | ENSRNOG00000010237 | Map7d1     |
| P-STAT3 | 145626308 | 145627417 | 1,22 | ENSRNOG00000010550 | Trappc3    |
| P-STAT3 | 145691600 | 145692446 | 1,11 | ENSRNOG00000010849 | Adprhl2    |
| P-STAT3 | 146756530 | 146757474 | 1,11 | ENSRNOG00000014357 | Gja4       |
| P-STAT3 | 146802038 | 146802589 | 1,28 | ENSRNOG00000026910 | Gjb4       |
| P-STAT3 | 147845512 | 147845997 | 1,22 | ENSRNOG00000042455 | Tlr12      |
| P-STAT3 | 147976744 | 147977273 | 1,16 | ENSRNOG00000005935 | A3galt2    |
| P-STAT3 | 147978048 | 147979692 | 1    | ENSRNOG00000005935 | A3galt2    |
| P-STAT3 | 148279787 | 148280451 | 1,28 | ENSRNOG00000006979 | HPCA_RAT   |
| P-STAT3 | 149388810 | 149389592 | 1,28 | ENSRNOG00000012266 | Zcchc17    |
| P-STAT3 | 149388810 | 149389592 | 1,28 | ENSRNOG00000012219 | RGD1309198 |
| P-STAT3 | 151274620 | 151275559 | 0,89 | ENSRNOG00000042411 | Rps6ka1    |
| P-STAT3 | 151859150 | 151859782 | 1,5  | ENSRNOG00000008600 | Sytl1      |
| P-STAT3 | 151916125 | 151916590 | 1,28 | ENSRNOG00000009540 | Gpr3       |
| P-STAT3 | 151916125 | 151916590 | 1,28 | ENSRNOG00000009505 | Cd164l2    |
| P-STAT3 | 152507692 | 152508241 | 1,22 | ENSRNOG00000010396 | Eya3       |
| P-STAT3 | 152880460 | 152881399 | 1    | ENSRNOG00000015967 | Sh3bgrl3   |
| P-STAT3 | 153154581 | 153155107 | 1,66 | ENSRNOG00000022288 | Pafah2     |
| P-STAT3 | 153263564 | 153264413 | 1    | ENSRNOG00000022054 | Paqr7      |
| P-STAT3 | 153263564 | 153264413 | 1    | ENSRNOG00000022030 | LOC689656  |
| P-STAT3 | 154395007 | 154395366 | 1,33 | ENSRNOG00000026676 | LOC500567  |
| P-STAT3 | 154700817 | 154701846 | 1    | ENSRNOG00000009325 | Fuca1      |
| P-STAT3 | 154975535 | 154975889 | 1,22 | ENSRNOG00000011794 | Q5BK74_RAT |
| P-STAT3 | 154976643 | 154977582 | 1,22 | ENSRNOG00000011794 | Q5BK74_RAT |
| P-STAT3 | 155661782 | 155663330 | 1,16 | ENSRNOG00000012804 | C1qc       |
| P-STAT3 | 157532289 | 157533014 | 1,33 | ENSRNOG00000016647 | Pla2g2c    |
| P-STAT3 | 158402209 | 158403058 | 1,55 | ENSRNOG00000042417 | Iffo2      |
| P-STAT3 | 159937428 | 159937953 | 1,11 | ENSRNOG00000008427 | Necap2     |
| P-STAT3 | 160624289 | 160624653 | 1,55 | ENSRNOG00000012274 | Ddi2       |
| P-STAT3 | 162175673 | 162176132 | 1,33 | ENSRNOG00000014961 | Pdpm       |
| P-STAT3 | 165062766 | 165063191 | 1,33 | ENSRNOG00000008141 | Nppb       |
| P-STAT3 | 167354061 | 167354625 | 1,55 | ENSRNOG00000021355 | Car6       |
| P-STAT3 | 168068751 | 168069594 | 1,05 | ENSRNOG00000036942 | Q4V895_RAT |
| P-STAT3 | 169297743 | 169299513 | 1,22 | ENSRNOG00000022694 | Plekhg5    |
| P-STAT3 | 169342274 | 169343523 | 1,44 | ENSRNOG00000021814 | Tnfrsf25   |
| P-STAT3 | 169384905 | 169385234 | 1,22 | ENSRNOG00000010270 | Espn       |
| P-STAT3 | 169384905 | 169385234 | 1,22 | ENSRNOG00000010490 | Hes2       |
| P-STAT3 | 171082394 | 171082928 | 1,11 | ENSRNOG00000024707 | Tp73       |
| P-STAT3 | 171474216 | 171475145 | 1,05 | ENSRNOG00000012586 | Actrt2     |
| P-STAT3 | 171764214 | 171765463 | 1    | ENSRNOG00000013850 | Hes5       |
| P-STAT3 | 171764214 | 171765463 | 1    | ENSRNOG00000014044 | Pank4      |
| P-STAT3 | 171885155 | 171886410 | 0,89 | ENSRNOG00000014642 | Morn1      |
| P-STAT3 | 172171344 | 172172095 | 1,11 | ENSRNOG00000015480 | Prkcz      |
| P-STAT3 | 172392023 | 172392968 | 0,83 | ENSRNOG00000016936 | Nadk       |
| P-STAT3 | 172727360 | 172727717 | 1,33 | ENSRNOG00000022455 | Gltpd1     |
| P-STAT3 | 172727360 | 172727717 | 1,33 | ENSRNOG00000019712 | Cpsf3l     |

|         |           |           |      |                    |             |
|---------|-----------|-----------|------|--------------------|-------------|
| P-STAT3 | 172749064 | 172749621 | 1,33 | ENSRNOG00000022354 | Pusl1       |
| P-STAT3 | 172749064 | 172749621 | 1,33 | ENSRNOG00000022307 | Acap3       |
| P-STAT3 | 172866719 | 172867083 | 1,28 | ENSRNOG00000022012 | LOC500598   |
| P-STAT3 | 173066427 | 173067481 | 1,28 | ENSRNOG00000021392 | Noc2l       |
| P-STAT3 | 173066427 | 173067481 | 1,28 | ENSRNOG00000020295 | RGD1311019  |
| P-STAT3 | 7183312   | 7183995   | 1,07 | ENSRNOG00000043468 | Mta3        |
| P-STAT3 | 8385178   | 8385622   | 1,24 | ENSRNOG00000007006 | Slc3a1      |
| P-STAT3 | 9012017   | 9012346   | 1,41 | ENSRNOG00000024544 | Six3        |
| P-STAT3 | 11355231  | 11355995  | 1,13 | ENSRNOG00000016110 | Kcnk12      |
| P-STAT3 | 21452459  | 21453114  | 1,35 | ENSRNOG00000027042 | Srd5a2      |
| P-STAT3 | 39496373  | 39496918  | 1,3  | ENSRNOG00000004110 | Trib2       |
| P-STAT3 | 41454032  | 41454396  | 1,41 | ENSRNOG00000005492 | Hpcal1      |
| P-STAT3 | 46551224  | 46551685  | 1,24 | ENSRNOG00000008950 | Adi1        |
| P-STAT3 | 48266849  | 48267413  | 1,13 | ENSRNOG00000004928 | Sntg2       |
| P-STAT3 | 54692852  | 54693212  | 1,41 | ENSRNOG00000005023 | Agr2        |
| P-STAT3 | 54878462  | 54879011  | 1,13 | ENSRNOG00000005623 | Ankmy2      |
| P-STAT3 | 57673874  | 57675021  | 1,13 | ENSRNOG00000006867 | Etv1        |
| P-STAT3 | 59216028  | 59217388  | 1,01 | ENSRNOG00000004282 | Arl4a       |
| P-STAT3 | 63713182  | 63713434  | 1,41 | ENSRNOG00000004067 | Nrcam       |
| P-STAT3 | 75647902  | 75648356  | 1,69 | ENSRNOG00000007114 | Psma6       |
| P-STAT3 | 75650164  | 75650928  | 1,24 | ENSRNOG00000007114 | Psma6       |
| P-STAT3 | 75731426  | 75731856  | 1,35 | ENSRNOG00000007390 | Nfkbia      |
| P-STAT3 | 75812111  | 75812471  | 1,69 | ENSRNOG00000030869 | Aldoa1      |
| P-STAT3 | 78012504  | 78013238  | 1,24 | ENSRNOG00000009284 | Foxa1       |
| P-STAT3 | 78854022  | 78854861  | 1,07 | ENSRNOG00000022697 | Clec14a     |
| P-STAT3 | 99000368  | 99001417  | 1,18 | ENSRNOG00000006472 | Hspa2       |
| P-STAT3 | 99380301  | 99380535  | 1,46 | ENSRNOG00000038455 | Gpx2        |
| P-STAT3 | 99403677  | 99404036  | 1,3  | ENSRNOG00000007364 | Rab15       |
| P-STAT3 | 101498860 | 101499122 | 1,3  | ENSRNOG00000009080 | Atp6v1d     |
| P-STAT3 | 109265853 | 109266801 | 1,13 | ENSRNOG00000006467 | Eif2b2      |
| P-STAT3 | 124379040 | 124379870 | 1,3  | ENSRNOG00000040566 | SNORA40     |
| P-STAT3 | 124379040 | 124379870 | 1,3  | ENSRNOG00000003951 | Psmc1       |
| P-STAT3 | 127031556 | 127032283 | 1,3  | ENSRNOG00000033970 | Moap1       |
| P-STAT3 | 127031556 | 127032283 | 1,3  | ENSRNOG00000008108 | Ubr7        |
| P-STAT3 | 128045112 | 128045946 | 1,07 | ENSRNOG00000011141 | Serpina11   |
| P-STAT3 | 128954991 | 128955818 | 1,69 | ENSRNOG00000011044 | Clmn        |
| P-STAT3 | 132823484 | 132824114 | 1,18 | ENSRNOG00000043143 | Eml1        |
| P-STAT3 | 133178541 | 133179784 | 1,18 | ENSRNOG00000004351 | Slc25a29    |
| P-STAT3 | 133178541 | 133179784 | 1,18 | ENSRNOG00000035618 | rno-mir-345 |
| P-STAT3 | 133233616 | 133234075 | 1,24 | ENSRNOG00000004359 | Wars        |
| P-STAT3 | 133371980 | 133372516 | 1,69 | ENSRNOG00000004733 | Wdr25       |
| P-STAT3 | 135608639 | 135609392 | 1,18 | ENSRNOG00000008035 | Cinp        |
| P-STAT3 | 136029548 | 136030933 | 1,3  | ENSRNOG00000009050 | Amn         |
| P-STAT3 | 136196305 | 136197464 | 1,24 | ENSRNOG00000010165 | Tnfaip2     |
| P-STAT3 | 136600418 | 136601057 | 1,3  | ENSRNOG00000012185 | Zfyve21     |
| P-STAT3 | 136910127 | 136910486 | 1,24 | ENSRNOG00000012843 | Aspg        |
| P-STAT3 | 137805703 | 137806545 | 1,18 | ENSRNOG00000037559 | Ahnak2      |
| P-STAT3 | 137805703 | 137806545 | 1,18 | ENSRNOG00000013690 | RGD1307315  |
| P-STAT3 | 3295505   | 3296155   | 1,22 | ENSRNOG00000029671 | Olr894      |

|         |          |          |      |                    |             |
|---------|----------|----------|------|--------------------|-------------|
| P-STAT3 | 4117079  | 4117639  | 1,28 | ENSRNOG00000030890 | Olr922      |
| P-STAT3 | 4365671  | 4366897  | 1,33 | ENSRNOG00000029842 | Olr931      |
| P-STAT3 | 5105641  | 5107074  | 1,17 | ENSRNOG00000033811 | Olr960      |
| P-STAT3 | 5105641  | 5107074  | 1,17 | ENSRNOG00000031403 | Olr960      |
| P-STAT3 | 5982108  | 5982574  | 1,22 | ENSRNOG00000029629 | Olr987      |
| P-STAT3 | 7082664  | 7083538  | 1,11 | ENSRNOG00000029518 | Olr1024     |
| P-STAT3 | 8000123  | 8001403  | 1,06 | ENSRNOG00000031181 | Olr1060     |
| P-STAT3 | 9688058  | 9688507  | 1,44 | ENSRNOG00000005370 | S1pr4       |
| P-STAT3 | 9691914  | 9692371  | 1,33 | ENSRNOG00000004793 | Ncln        |
| P-STAT3 | 9691914  | 9692371  | 1,33 | ENSRNOG00000005370 | S1pr4       |
| P-STAT3 | 9706218  | 9706847  | 1,17 | ENSRNOG00000004695 | BrunoI5     |
| P-STAT3 | 9826825  | 9827867  | 0,94 | ENSRNOG00000039861 | LOC690617   |
| P-STAT3 | 9828300  | 9828964  | 1,22 | ENSRNOG00000039861 | LOC690617   |
| P-STAT3 | 9829321  | 9830784  | 1,22 | ENSRNOG00000039861 | LOC690617   |
| P-STAT3 | 9839096  | 9839635  | 1,22 | ENSRNOG00000039858 | RGD1307722  |
| P-STAT3 | 9946990  | 9948238  | 1,17 | ENSRNOG00000020431 | Matk        |
| P-STAT3 | 10016217 | 10016751 | 1,28 | ENSRNOG00000020383 | Dapk3       |
| P-STAT3 | 10019495 | 10020246 | 1,28 | ENSRNOG00000035271 | SNORD37     |
| P-STAT3 | 10019495 | 10020246 | 1,28 | ENSRNOG00000020383 | Dapk3       |
| P-STAT3 | 10021282 | 10022110 | 1,39 | ENSRNOG00000020266 | Eef2        |
| P-STAT3 | 10021282 | 10022110 | 1,39 | ENSRNOG00000035271 | SNORD37     |
| P-STAT3 | 10021282 | 10022110 | 1,39 | ENSRNOG00000020383 | Dapk3       |
| P-STAT3 | 10365775 | 10366225 | 1,33 | ENSRNOG00000019552 | Lsm7        |
| P-STAT3 | 10365775 | 10366225 | 1,33 | ENSRNOG00000033794 | Sppl2b      |
| P-STAT3 | 10822627 | 10823282 | 1,11 | ENSRNOG00000028956 | B2RZ64_RAT  |
| P-STAT3 | 10959140 | 10959684 | 1,33 | ENSRNOG00000031387 | Dazap1      |
| P-STAT3 | 10959140 | 10959684 | 1,33 | ENSRNOG00000024577 | Gamt        |
| P-STAT3 | 11338662 | 11339117 | 1,5  | ENSRNOG00000029814 | Prtn3       |
| P-STAT3 | 11401057 | 11402306 | 1    | ENSRNOG00000010423 | LOC500797   |
| P-STAT3 | 11516810 | 11517849 | 1,11 | ENSRNOG00000008414 | Bsg         |
| P-STAT3 | 11552326 | 11553385 | 1,17 | ENSRNOG00000008296 | LOC691093   |
| P-STAT3 | 11580778 | 11581142 | 1,44 | ENSRNOG00000008030 | Shc2        |
| P-STAT3 | 11692265 | 11692604 | 1,28 | ENSRNOG00000000177 | Ppap2c      |
| P-STAT3 | 12855608 | 12855952 | 1,39 | ENSRNOG00000006770 | Brd4        |
| P-STAT3 | 12923314 | 12923548 | 1,5  | ENSRNOG00000006355 | Akap8l      |
| P-STAT3 | 13600791 | 13601136 | 1,56 | ENSRNOG00000004786 | Cyp4f1      |
| P-STAT3 | 23406611 | 23407056 | 1,22 | ENSRNOG00000026793 | Nt5dc3      |
| P-STAT3 | 24846374 | 24847118 | 1,28 | ENSRNOG00000004727 | Nup37       |
| P-STAT3 | 24846374 | 24847118 | 1,28 | ENSRNOG00000004682 | LOC10031087 |
| P-STAT3 | 30313791 | 30314545 | 1,11 | ENSRNOG00000004367 | Elk3        |
| P-STAT3 | 30718063 | 30718422 | 1,33 | ENSRNOG00000005573 | RGD1565947  |
| P-STAT3 | 38140910 | 38141374 | 1,28 | ENSRNOG00000006749 | Tmtc3       |
| P-STAT3 | 57143884 | 57144126 | 1,56 | ENSRNOG00000007273 | LOC366898   |
| P-STAT3 | 57143884 | 57144126 | 1,56 | ENSRNOG00000007048 | Rap1b       |
| P-STAT3 | 60671661 | 60673090 | 1    | ENSRNOG00000004919 | Q32KJ5_RAT  |
| P-STAT3 | 60954876 | 60955522 | 1,22 | ENSRNOG00000023824 | RGD1561648  |
| P-STAT3 | 67137776 | 67138739 | 1,11 | ENSRNOG00000029465 | RGD1564851  |
| P-STAT3 | 71479676 | 71480109 | 1,33 | ENSRNOG00000010807 | Cox6c       |
| P-STAT3 | 77510585 | 77510957 | 1,28 | ENSRNOG00000007999 | Abra        |

|         |           |           |      |                     |            |
|---------|-----------|-----------|------|---------------------|------------|
| P-STAT3 | 79264804  | 79265547  | 1,22 | ENSRNOG00000005123  | Ttc35      |
| P-STAT3 | 94689136  | 94689690  | 1,56 | ENSRNOG00000006251  | Fam83a     |
| P-STAT3 | 103145571 | 103146005 | 1,22 | ENSRNOG000000025528 | Efr3a      |
| P-STAT3 | 110865546 | 110865895 | 1,28 | ENSRNOG00000008533  | Eif2c2     |
| P-STAT3 | 111461221 | 111461781 | 1,44 | ENSRNOG00000007628  | Ptp4a3     |
| P-STAT3 | 113150198 | 113150902 | 1,11 | ENSRNOG00000007091  | Ly6e       |
| P-STAT3 | 113621132 | 113621581 | 1,22 | ENSRNOG00000007500  | Top1mt     |
| P-STAT3 | 113933684 | 113934111 | 1,39 | ENSRNOG00000009020  | Tsta3      |
| P-STAT3 | 114373630 | 114373966 | 1,33 | ENSRNOG00000012348  | Exosc4     |
| P-STAT3 | 114501342 | 114501991 | 1,17 | ENSRNOG00000021812  | Scx        |
| P-STAT3 | 114503870 | 114504194 | 1,5  | ENSRNOG00000021812  | Scx        |
| P-STAT3 | 114574818 | 114575367 | 1,44 | ENSRNOG00000025594  | Scrt1      |
| P-STAT3 | 114590633 | 114593095 | 1,06 | ENSRNOG00000025497  | Fbxl6      |
| P-STAT3 | 114590633 | 114593095 | 1,06 | ENSRNOG00000032561  | A3KN99_RAT |
| P-STAT3 | 114628072 | 114628716 | 1,28 | ENSRNOG00000030334  | Adck5      |
| P-STAT3 | 114662248 | 114662697 | 1,28 | ENSRNOG00000030705  | Cpsf1      |
| P-STAT3 | 116165615 | 116166266 | 1,33 | ENSRNOG00000006940  | Ncf4       |
| P-STAT3 | 116375510 | 116376349 | 1,39 | ENSRNOG00000000231  | RGD1311154 |
| P-STAT3 | 116531736 | 116532766 | 1,39 | ENSRNOG00000007350  | Rac2       |
| P-STAT3 | 116807728 | 116808257 | 1,22 | ENSRNOG00000008517  | Cdc42ep1   |
| P-STAT3 | 118537764 | 118538822 | 1,94 | ENSRNOG00000017801  | Atf4       |
| P-STAT3 | 118578509 | 118578948 | 1,22 | ENSRNOG00000029914  | Cacna1i    |
| P-STAT3 | 120522906 | 120523468 | 1,22 | ENSRNOG00000007400  | Sreb2      |
| P-STAT3 | 120618651 | 120619278 | 1,39 | ENSRNOG00000023262  | Cenpm      |
| P-STAT3 | 121597044 | 121597593 | 1,78 | ENSRNOG00000010549  | Tspo       |
| P-STAT3 | 121751187 | 121751731 | 1,28 | ENSRNOG00000010617  | Scube1     |
| P-STAT3 | 127125862 | 127126406 | 1,28 | ENSRNOG00000004591  | Alg12      |
| P-STAT3 | 127628933 | 127629687 | 1    | ENSRNOG00000008694  | Miox       |
| P-STAT3 | 137239797 | 137241245 | 1,39 | ENSRNOG00000031503  | Olr1111    |
| P-STAT3 | 138440556 | 138441892 | 1,28 | ENSRNOG00000034268  | Smarcd1    |
| P-STAT3 | 138969482 | 138969936 | 1,33 | ENSRNOG00000032162  | Atf1       |
| P-STAT3 | 139685926 | 139686520 | 1,39 | ENSRNOG00000005309  | Scn8a      |
| P-STAT3 | 140287403 | 140287732 | 1,67 | ENSRNOG00000008819  | Krt84      |
| P-STAT3 | 140308604 | 140309168 | 1,22 | ENSRNOG00000033403  | Krt82      |
| P-STAT3 | 140317664 | 140318609 | 1,11 | ENSRNOG00000009105  | Kb15       |
| P-STAT3 | 140320664 | 140321093 | 1,28 | ENSRNOG00000009105  | Kb15       |
| P-STAT3 | 140328796 | 140329360 | 1,22 | ENSRNOG00000043203  | K2C75_RAT  |
| P-STAT3 | 140566463 | 140567002 | 1,44 | ENSRNOG00000036865  | K2C1B_RAT  |
| P-STAT3 | 140589812 | 140590181 | 1,39 | ENSRNOG00000031785  | Krt76      |
| P-STAT3 | 141422193 | 141423775 | 0,89 | ENSRNOG00000015320  | Atp5g2     |
| P-STAT3 | 142400305 | 142401038 | 1,11 | ENSRNOG00000036828  | Pde1b      |
| P-STAT3 | 142438429 | 142438781 | 1,28 | ENSRNOG00000036827  | Ppp1r1a    |
| P-STAT3 | 4158521   | 4159065   | 1,51 | ENSRNOG00000008478  | Mmp13      |
| P-STAT3 | 4522413   | 4523062   | 1,28 | ENSRNOG00000010507  | Mmp7       |
| P-STAT3 | 5783269   | 5783832   | 1,23 | ENSRNOG00000006831  | Pgr        |
| P-STAT3 | 11646674  | 11647538  | 1,06 | ENSRNOG00000030318  | Gpr83      |
| P-STAT3 | 13282820  | 13283879  | 0,89 | ENSRNOG00000011585  | Fat3       |
| P-STAT3 | 15731895  | 15732934  | 1    | ENSRNOG00000026643  | Chordc1    |
| P-STAT3 | 16542274  | 16543554  | 1,23 | ENSRNOG00000006363  | Mbd3l1     |

|         |           |           |      |                    |            |
|---------|-----------|-----------|------|--------------------|------------|
| P-STAT3 | 16918160  | 16918913  | 1,06 | ENSRNOG00000030080 | Olr1124    |
| P-STAT3 | 17543293  | 17543858  | 1,28 | ENSRNOG00000033670 | Olr1145    |
| P-STAT3 | 18406718  | 18407789  | 1,39 | ENSRNOG00000031235 | Olr1165    |
| P-STAT3 | 20023978  | 20025122  | 1,17 | ENSRNOG00000020659 | Mrpl4      |
| P-STAT3 | 20648985  | 20649536  | 1,23 | ENSRNOG00000031129 | Carm1      |
| P-STAT3 | 21028932  | 21029857  | 1,23 | ENSRNOG00000011747 | Tmem205    |
| P-STAT3 | 21028932  | 21029857  | 1,23 | ENSRNOG00000011799 | RGD1308031 |
| P-STAT3 | 21057736  | 21058448  | 1,11 | ENSRNOG00000012604 | RGD1308026 |
| P-STAT3 | 32103954  | 32105002  | 1,06 | ENSRNOG00000033796 | Kcnj5      |
| P-STAT3 | 35237151  | 35237723  | 1,23 | ENSRNOG00000011789 | Cdon       |
| P-STAT3 | 38655517  | 38656071  | 1,11 | ENSRNOG00000031347 | Robo4      |
| P-STAT3 | 38773105  | 38774317  | 1,06 | ENSRNOG00000033217 | Esam       |
| P-STAT3 | 38798518  | 38799057  | 1,34 | ENSRNOG00000010688 | Nrgn       |
| P-STAT3 | 40553107  | 40554154  | 1,17 | ENSRNOG00000029246 | Olr1235    |
| P-STAT3 | 48064673  | 48065034  | 1,34 | ENSRNOG00000016221 | Scn2b      |
| P-STAT3 | 48270699  | 48271051  | 1,73 | ENSRNOG00000016397 | Tmprss13   |
| P-STAT3 | 49254408  | 49254875  | 1,28 | ENSRNOG00000018436 | Apoa5      |
| P-STAT3 | 49254408  | 49254875  | 1,28 | ENSRNOG00000018481 | Zfp259     |
| P-STAT3 | 60908738  | 60909093  | 1,23 | ENSRNOG00000018577 | Neil1      |
| P-STAT3 | 61360772  | 61361121  | 1,34 | ENSRNOG00000019317 | Cplx3      |
| P-STAT3 | 61375425  | 61375858  | 2,17 | ENSRNOG00000019355 | Lman1l     |
| P-STAT3 | 61384964  | 61385393  | 1,28 | ENSRNOG00000019374 | Csk        |
| P-STAT3 | 66960935  | 66961365  | 1,23 | ENSRNOG00000007077 | Fem1b      |
| P-STAT3 | 67127034  | 67127293  | 1,51 | ENSRNOG00000034272 | Pias1      |
| P-STAT3 | 67543359  | 67544007  | 1,67 | ENSRNOG00000007926 | Map2k5     |
| P-STAT3 | 71145181  | 71146405  | 0,95 | ENSRNOG00000027295 | Aph1b      |
| P-STAT3 | 79644875  | 79645345  | 1,45 | ENSRNOG00000008095 | Onecut1    |
| P-STAT3 | 82605871  | 82606220  | 1,51 | ENSRNOG00000006224 | Khlh31     |
| P-STAT3 | 86960747  | 86961591  | 1,11 | ENSRNOG00000023794 | LOC679805  |
| P-STAT3 | 91828890  | 91829250  | 1,73 | ENSRNOG00000009515 | Pgm3       |
| P-STAT3 | 93013897  | 93014526  | 1,39 | ENSRNOG00000010685 | Tbx18      |
| P-STAT3 | 94043626  | 94044262  | 1,17 | ENSRNOG00000013229 | Mthfs      |
| P-STAT3 | 103602667 | 103603214 | 1,95 | ENSRNOG00000013794 | Rbp1       |
| P-STAT3 | 105999727 | 106000209 | 1,39 | ENSRNOG00000015869 | Pccb       |
| P-STAT3 | 111409446 | 111409801 | 1,23 | ENSRNOG00000037295 | Wdr51a     |
| P-STAT3 | 112780250 | 112781359 | 1,28 | ENSRNOG00000021899 | Tmem115    |
| P-STAT3 | 112797868 | 112798328 | 1,28 | ENSRNOG00000021548 | Rassf1     |
| P-STAT3 | 112835555 | 112835814 | 2,06 | ENSRNOG00000016150 | Ifrd2      |
| P-STAT3 | 112853502 | 112854496 | 1    | ENSRNOG00000016512 | Sema3b     |
| P-STAT3 | 112931983 | 112932709 | 1,45 | ENSRNOG00000017589 | Gnat1      |
| P-STAT3 | 113312907 | 113314135 | 0,95 | ENSRNOG00000037229 | Gmppb      |
| P-STAT3 | 113603041 | 113603481 | 1,73 | ENSRNOG00000031965 | Impdh2     |
| P-STAT3 | 114065452 | 114066289 | 1,06 | ENSRNOG00000020667 | MGC94600   |
| P-STAT3 | 114218269 | 114218508 | 1,45 | ENSRNOG00000020733 | Camp       |
| P-STAT3 | 115035766 | 115036311 | 1,23 | ENSRNOG00000027880 | Nbeal2     |
| P-STAT3 | 115035766 | 115036311 | 1,23 | ENSRNOG00000020946 | Ccdc12     |
| P-STAT3 | 115418365 | 115418810 | 1,23 | ENSRNOG00000031779 | Ltf        |
| P-STAT3 | 118790070 | 118791464 | 1,39 | ENSRNOG00000010196 | Glb1       |
| P-STAT3 | 124321463 | 124322306 | 0,89 | ENSRNOG00000014168 | Xylb       |

|         |           |           |      |                    |            |
|---------|-----------|-----------|------|--------------------|------------|
| P-STAT3 | 124939645 | 124940708 | 1,45 | ENSRNOG00000033433 | Csrnp1     |
| P-STAT3 | 124941970 | 124942305 | 1,67 | ENSRNOG00000033433 | Csrnp1     |
| P-STAT3 | 126369584 | 126370738 | 0,84 | ENSRNOG00000019262 | RGD1307844 |
| P-STAT3 | 126952532 | 126952979 | 1,23 | ENSRNOG00000019492 | RGD1304827 |
| P-STAT3 | 127019202 | 127019572 | 1,23 | ENSRNOG00000019481 | Cyp8b1     |
| P-STAT3 | 127027166 | 127027995 | 1,67 | ENSRNOG00000044749 | 7SK        |
| P-STAT3 | 127987717 | 127988791 | 1,17 | ENSRNOG00000004743 | Cdcp1      |
| P-STAT3 | 133760    | 134319    | 1,29 | ENSRNOG00000010597 | Slc5a7     |
| P-STAT3 | 9065480   | 9065834   | 1,63 | ENSRNOG00000015623 | Guca1b     |
| P-STAT3 | 9135829   | 9136168   | 1,29 | ENSRNOG00000022598 | Trerf1     |
| P-STAT3 | 9866763   | 9867462   | 1,12 | ENSRNOG00000018397 | RGD620382  |
| P-STAT3 | 11041894  | 11043426  | 1,07 | ENSRNOG00000019900 | Dsm-1      |
| P-STAT3 | 11045762  | 11047001  | 1,35 | ENSRNOG00000019900 | Dsm-1      |
| P-STAT3 | 13323269  | 13323909  | 1,4  | ENSRNOG00000011154 | Gpr116     |
| P-STAT3 | 20071315  | 20071757  | 1,63 | ENSRNOG00000013484 | Gsta1      |
| P-STAT3 | 20071315  | 20071757  | 1,63 | ENSRNOG00000031078 | RGD1566137 |
| P-STAT3 | 32492827  | 32493566  | 1,57 | ENSRNOG00000012709 | Bag2       |
| P-STAT3 | 33180025  | 33180600  | 1,4  | ENSRNOG00000013285 | Imp4       |
| P-STAT3 | 33180025  | 33180600  | 1,4  | ENSRNOG00000013234 | B2GV96_RAT |
| P-STAT3 | 33193755  | 33194099  | 1,46 | ENSRNOG00000013415 | Ptpn18     |
| P-STAT3 | 35493453  | 35494102  | 1,4  | ENSRNOG00000023995 | Ankrd39    |
| P-STAT3 | 36821905  | 36822955  | 1,18 | ENSRNOG00000018464 | Lipt1      |
| P-STAT3 | 42237217  | 42237872  | 1,12 | ENSRNOG00000016446 | Gpr45      |
| P-STAT3 | 57082169  | 57082520  | 1,24 | ENSRNOG00000025768 | Clk1       |
| P-STAT3 | 57657655  | 57658184  | 1,85 | ENSRNOG00000012637 | Als2cr11   |
| P-STAT3 | 63790972  | 63791935  | 1,01 | ENSRNOG00000015020 | Idh1       |
| P-STAT3 | 63942148  | 63942677  | 1,24 | ENSRNOG00000015259 | Pth2r      |
| P-STAT3 | 73604385  | 73605110  | 1,24 | ENSRNOG00000014391 | Gpbar1     |
| P-STAT3 | 73876875  | 73877415  | 1,69 | ENSRNOG00000016361 | Plcd4      |
| P-STAT3 | 74038407  | 74039271  | 1,24 | ENSRNOG00000017188 | Cyp27a1    |
| P-STAT3 | 78198774  | 78199543  | 1,29 | ENSRNOG00000015039 | Kcne4      |
| P-STAT3 | 85899397  | 85899833  | 1,74 | ENSRNOG00000030020 | Alpi       |
| P-STAT3 | 85986976  | 85987728  | 1,4  | ENSRNOG00000029865 | RGD1563955 |
| P-STAT3 | 85994565  | 85994896  | 1,24 | ENSRNOG00000019527 | Chrnd      |
| P-STAT3 | 86330220  | 86330582  | 1,52 | ENSRNOG00000016653 | Ngef       |
| P-STAT3 | 92255648  | 92255877  | 1,35 | ENSRNOG00000024030 | Gpr35      |
| P-STAT3 | 92436668  | 92437127  | 1,24 | ENSRNOG00000023557 | RGD1563692 |
| P-STAT3 | 92623197  | 92624528  | 0,96 | ENSRNOG00000016888 | Pask       |
| P-STAT3 | 92623197  | 92624528  | 0,96 | ENSRNOG00000016974 | Ppp1r7     |
| P-STAT3 | 92751933  | 92752380  | 1,29 | ENSRNOG00000017952 | 02-wrz     |
| P-STAT3 | 110186595 | 110186929 | 1,35 | ENSRNOG00000015733 | Mrlc2      |
| P-STAT3 | 110188025 | 110188469 | 1,35 | ENSRNOG00000015733 | Mrlc2      |
| P-STAT3 | 25991624  | 25992268  | 1,39 | ENSRNOG00000028887 | LOC691895  |
| P-STAT3 | 26654115  | 26654755  | 1,39 | ENSRNOG00000024801 | Slc35a2    |
| P-STAT3 | 26890432  | 26890774  | 1,68 | ENSRNOG00000022417 | Prickle3   |
| P-STAT3 | 34841290  | 34842044  | 1,16 | ENSRNOG00000004676 | Pak3       |
| P-STAT3 | 41488471  | 41488820  | 1,97 | ENSRNOG00000003049 | HCD2_RAT   |
| P-STAT3 | 50813722  | 50814906  | 1,04 | ENSRNOG00000003554 | Piga       |
| P-STAT3 | 88590499  | 88590844  | 1,45 | ENSRNOG00000002953 | P2ry4      |

|         |           |           |      |                     |              |
|---------|-----------|-----------|------|---------------------|--------------|
| P-STAT3 | 89448904  | 89449242  | 1,33 | ENSRNOG00000003746  | CXB1_RAT     |
| P-STAT3 | 91129381  | 91129835  | 1,27 | ENSRNOG00000003025  | Nap1l2       |
| P-STAT3 | 92943865  | 92944814  | 1,16 | ENSRNOG000000021400 | Magee2       |
| P-STAT3 | 93150675  | 93151014  | 1,85 | ENSRNOG000000002662 | RGD1562502   |
| P-STAT3 | 94353424  | 94353953  | 2,02 | ENSRNOG000000002453 | Taf9b        |
| P-STAT3 | 95644740  | 95645389  | 1,56 | ENSRNOG000000002365 | Itm2a        |
| P-STAT3 | 96114456  | 96116191  | 1,27 | ENSRNOG000000023637 | RGD1559589   |
| P-STAT3 | 96116548  | 96117190  | 1,39 | ENSRNOG000000023637 | RGD1559589   |
| P-STAT3 | 96196274  | 96197371  | 1,45 | ENSRNOG000000037827 | RGD1561552   |
| P-STAT3 | 113925692 | 113926857 | 1,21 | ENSRNOG000000042823 | RGD1561230   |
| P-STAT3 | 121439056 | 121439402 | 1,27 | ENSRNOG000000003786 | Tspan6       |
| P-STAT3 | 121621874 | 121622208 | 1,33 | ENSRNOG000000026961 | Xkrx         |
| P-STAT3 | 121773939 | 121774375 | 1,45 | ENSRNOG000000001506 | Tmem35       |
| P-STAT3 | 122065025 | 122065481 | 1,56 | ENSRNOG000000037711 | LOC501618    |
| P-STAT3 | 136310507 | 136310754 | 1,33 | ENSRNOG000000007600 | Igsf1        |
| P-STAT3 | 150886841 | 150887413 | 1,33 | ENSRNOG000000012560 | Ctag2        |
| P-STAT3 | 159337413 | 159337880 | 1,16 | ENSRNOG000000017312 | Trex2        |
| P-STAT3 | 159536814 | 159537158 | 1,97 | ENSRNOG000000025298 | Dusp9        |
| P-STAT3 | 159899489 | 159900815 | 1,1  | ENSRNOG000000037264 | Hcfc1        |
| P-STAT3 | 160217660 | 160218287 | 1,45 | ENSRNOG000000037253 | Fam3a        |
| P-STAT5 | 13973297  | 13973847  | 1,5  | ENSRNOG000000011994 | Perp         |
| P-STAT5 | 21083218  | 21084207  | 1,37 | ENSRNOG000000013791 | Enpp3        |
| P-STAT5 | 21330173  | 21330531  | 2,31 | ENSRNOG000000015036 | Ctgf         |
| P-STAT5 | 21912618  | 21913412  | 1,37 | ENSRNOG000000032144 | Taar7g       |
| P-STAT5 | 26785615  | 26786104  | 1,56 | ENSRNOG000000021478 | Tpd52l1      |
| P-STAT5 | 30390559  | 30391203  | 1,5  | ENSRNOG000000026501 | Slc6a19      |
| P-STAT5 | 46944142  | 46944976  | 1,37 | ENSRNOG000000012229 | T            |
| P-STAT5 | 56516085  | 56516639  | 1,56 | ENSRNOG000000010994 | Has1<i><sup> |
| P-STAT5 | 65742951  | 65744005  | 1,68 | ENSRNOG000000015254 | Olr3         |
| P-STAT5 | 65771385  | 65771853  | 1,5  | ENSRNOG000000015263 | Olr5         |
| P-STAT5 | 65795573  | 65796322  | 1,56 | ENSRNOG000000015289 | Olr7         |
| P-STAT5 | 67582597  | 67582951  | 1,68 | ENSRNOG000000016608 | Znf579       |
| P-STAT5 | 67794190  | 67794520  | 1,62 | ENSRNOG000000033173 | Fam71e2      |
| P-STAT5 | 76511036  | 76512104  | 1,12 | ENSRNOG000000021390 | Meis3        |
| P-STAT5 | 77164027  | 77164481  | 1,62 | ENSRNOG000000016434 | Prkd2        |
| P-STAT5 | 77234009  | 77234967  | 1,56 | ENSRNOG000000016756 | Ptgir        |
| P-STAT5 | 78134988  | 78135544  | 1,56 | ENSRNOG000000017721 | Psg19        |
| P-STAT5 | 78403630  | 78404708  | 1,12 | ENSRNOG000000014788 | Q4V8E8_RAT   |
| P-STAT5 | 78916446  | 78917221  | 1,37 | ENSRNOG000000018101 | KLC3_RAT     |
| P-STAT5 | 79000148  | 79000692  | 2,06 | ENSRNOG000000018426 | Apoc1        |
| P-STAT5 | 80383527  | 80384009  | 1,62 | ENSRNOG000000020310 | Grik5        |
| P-STAT5 | 80386066  | 80386495  | 1,5  | ENSRNOG000000020310 | Grik5        |
| P-STAT5 | 80386066  | 80386495  | 1,5  | ENSRNOG000000020362 | Znf574       |
| P-STAT5 | 80685853  | 80686492  | 1,87 | ENSRNOG000000020546 | Lipe<i><sup> |
| P-STAT5 | 80830406  | 80831292  | 1,62 | ENSRNOG000000020606 | B3gnt8       |
| P-STAT5 | 82228603  | 82229583  | 1,31 | ENSRNOG000000028891 | Cyp2t1       |
| P-STAT5 | 82578518  | 82578867  | 1,62 | ENSRNOG000000018369 | Prx          |
| P-STAT5 | 82623523  | 82623762  | 1,37 | ENSRNOG000000018390 | Pld3         |
| P-STAT5 | 83968495  | 83969354  | 1,56 | ENSRNOG000000020380 | Lgals7       |

|         |           |           |      |                    |            |
|---------|-----------|-----------|------|--------------------|------------|
| P-STAT5 | 85236970  | 85237422  | 1,81 | ENSRNOG00000033023 | LOC688574  |
| P-STAT5 | 85236970  | 85237422  | 1,81 | ENSRNOG00000020821 | Clip3      |
| P-STAT5 | 85318051  | 85318600  | 2,12 | ENSRNOG00000020839 | Lrfn3      |
| P-STAT5 | 85515289  | 85515558  | 1,5  | ENSRNOG00000001503 | Capns1     |
| P-STAT5 | 85516759  | 85517921  | 1,93 | ENSRNOG00000001503 | Capns1     |
| P-STAT5 | 85599715  | 85600668  | 1,37 | ENSRNOG00000024625 | RGD1565712 |
| P-STAT5 | 85599715  | 85600668  | 1,37 | ENSRNOG00000020922 | Hspb6      |
| P-STAT5 | 85636521  | 85637186  | 1,31 | ENSRNOG00000020961 | Mll4       |
| P-STAT5 | 85636521  | 85637186  | 1,31 | ENSRNOG00000042465 | Zbtb32     |
| P-STAT5 | 85704785  | 85705191  | 1,68 | ENSRNOG00000024278 | Rbm42      |
| P-STAT5 | 85796104  | 85797166  | 1,68 | ENSRNOG00000021015 | Sbsn       |
| P-STAT5 | 86097807  | 86098572  | 1,25 | ENSRNOG00000021067 | Fxyd7      |
| P-STAT5 | 86097807  | 86098572  | 1,25 | ENSRNOG00000021079 | Fxyd1      |
| P-STAT5 | 86097807  | 86098572  | 1,25 | ENSRNOG00000021087 | Lgi4       |
| P-STAT5 | 86121327  | 86122076  | 1,25 | ENSRNOG00000021095 | Fxyd3      |
| P-STAT5 | 86655744  | 86656026  | 1,75 | ENSRNOG00000021119 | Pdcd2l     |
| P-STAT5 | 93805909  | 93806837  | 1,5  | ENSRNOG00000017681 | Lim2       |
| P-STAT5 | 94240482  | 94240926  | 1,56 | ENSRNOG00000018664 | Klk7       |
| P-STAT5 | 94242468  | 94243032  | 1,68 | ENSRNOG00000018664 | Klk7       |
| P-STAT5 | 94322307  | 94322656  | 2,06 | ENSRNOG00000018864 | Klk4       |
| P-STAT5 | 94384442  | 94384896  | 1,56 | ENSRNOG00000029266 | Klk1c10    |
| P-STAT5 | 94459128  | 94459402  | 1,43 | ENSRNOG00000033086 | Gk11       |
| P-STAT5 | 94692285  | 94693943  | 1,37 | ENSRNOG00000029221 | Klk1b3     |
| P-STAT5 | 94940232  | 94941389  | 1,19 | ENSRNOG00000019424 | Aspdh      |
| P-STAT5 | 94940232  | 94941389  | 1,19 | ENSRNOG00000019442 | Josd2      |
| P-STAT5 | 94942540  | 94943639  | 1,31 | ENSRNOG00000019442 | Josd2      |
| P-STAT5 | 94942540  | 94943639  | 1,31 | ENSRNOG00000019424 | Aspdh      |
| P-STAT5 | 95448637  | 95449271  | 1,75 | ENSRNOG00000026163 | Cpt1c      |
| P-STAT5 | 95485550  | 95486514  | 1,12 | ENSRNOG00000037247 | Rras       |
| P-STAT5 | 95654293  | 95655440  | 1    | ENSRNOG00000020681 | Pth2       |
| P-STAT5 | 95800885  | 95802264  | 1,19 | ENSRNOG00000020719 | Hrc        |
| P-STAT5 | 95869777  | 95870306  | 1,81 | ENSRNOG00000020763 | Snrnp70    |
| P-STAT5 | 95903189  | 95904268  | 1,31 | ENSRNOG00000020812 | Gys1       |
| P-STAT5 | 96265101  | 96265465  | 1,56 | ENSRNOG00000021048 | 5E5_RAT    |
| P-STAT5 | 96265101  | 96265465  | 1,56 | ENSRNOG00000021046 | Sult2b1    |
| P-STAT5 | 99802348  | 99802698  | 1,68 | ENSRNOG00000015675 | Nell1      |
| P-STAT5 | 130883883 | 130884837 | 1,31 | ENSRNOG00000011160 | Sv2b       |
| P-STAT5 | 134631327 | 134632089 | 1,19 | ENSRNOG00000018151 | Isg20      |
| P-STAT5 | 135618349 | 135619198 | 1,25 | ENSRNOG00000014610 | Anpep      |
| P-STAT5 | 135896212 | 135896977 | 1,56 | ENSRNOG00000013949 | Idh2       |
| P-STAT5 | 136160882 | 136161241 | 1,68 | ENSRNOG00000012357 | Unc45a     |
| P-STAT5 | 136160882 | 136161241 | 1,68 | ENSRNOG00000012236 | Hddc3      |
| P-STAT5 | 137103897 | 137104341 | 1,81 | ENSRNOG00000011011 | Nmb        |
| P-STAT5 | 144629432 | 144630073 | 1,37 | ENSRNOG00000016496 | Ctsc       |
| P-STAT5 | 154986833 | 154987283 | 1,93 | ENSRNOG00000013358 | Aqp11      |
| P-STAT5 | 156145456 | 156146010 | 1,81 | ENSRNOG00000042782 | RGD1561870 |
| P-STAT5 | 157086059 | 157086503 | 1,75 | ENSRNOG00000030788 | Olr36      |
| P-STAT5 | 158301494 | 158303053 | 1    | ENSRNOG00000025075 | Relt       |
| P-STAT5 | 158376410 | 158376843 | 1,62 | ENSRNOG00000019192 | Arhgef17   |

|         |           |           |      |                    |             |
|---------|-----------|-----------|------|--------------------|-------------|
| P-STAT5 | 158921160 | 158921627 | 1,5  | ENSRNOG00000019560 | Pde2a       |
| P-STAT5 | 159272547 | 159273103 | 1,75 | ENSRNOG00000019706 | Phox2a      |
| P-STAT5 | 159546026 | 159546572 | 1,5  | ENSRNOG00000020175 | Rnf121      |
| P-STAT5 | 160485770 | 160486532 | 0,94 | ENSRNOG00000015444 | Olr49       |
| P-STAT5 | 160490019 | 160490353 | 1,75 | ENSRNOG00000015444 | Olr49       |
| P-STAT5 | 160761702 | 160762351 | 1,56 | ENSRNOG00000015649 | Olr68       |
| P-STAT5 | 160825800 | 160826144 | 1,68 | ENSRNOG00000015689 | Olr74       |
| P-STAT5 | 161201432 | 161201860 | 1,56 | ENSRNOG00000030169 | Olr103      |
| P-STAT5 | 161645758 | 161646015 | 1,62 | ENSRNOG00000030879 | Hbg1        |
| P-STAT5 | 162247639 | 162248383 | 1,31 | ENSRNOG00000017239 | Olr156      |
| P-STAT5 | 162422615 | 162422978 | 1,56 | ENSRNOG00000032268 | Olr165      |
| P-STAT5 | 163080627 | 163081069 | 1,68 | ENSRNOG00000025819 | Olr202      |
| P-STAT5 | 163300563 | 163301117 | 1,56 | ENSRNOG00000018020 | Apbb1       |
| P-STAT5 | 163516229 | 163516898 | 1,62 | ENSRNOG00000031643 | Dchs1       |
| P-STAT5 | 164256534 | 164256873 | 2    | ENSRNOG00000029142 | Olr226      |
| P-STAT5 | 165593708 | 165594349 | 1,31 | ENSRNOG00000036787 | Olr252      |
| P-STAT5 | 170073702 | 170075048 | 1,31 | ENSRNOG00000016244 | Mical2      |
| P-STAT5 | 177728926 | 177729375 | 1,56 | ENSRNOG00000015716 | Gp2         |
| P-STAT5 | 178971860 | 178972809 | 1,5  | ENSRNOG00000027505 | Abca15      |
| P-STAT5 | 182327216 | 182327465 | 1,37 | ENSRNOG00000014652 | Aqp8        |
| P-STAT5 | 184410605 | 184411229 | 2,25 | ENSRNOG00000042706 | LOC10027184 |
| P-STAT5 | 185454432 | 185455362 | 1,37 | ENSRNOG00000017429 | Lat         |
| P-STAT5 | 185457457 | 185458685 | 1,25 | ENSRNOG00000017429 | Lat         |
| P-STAT5 | 185489817 | 185490051 | 1,37 | ENSRNOG00000017994 | Nfatc2ip    |
| P-STAT5 | 185970639 | 185971885 | 1,56 | ENSRNOG00000019813 | Ppp4c       |
| P-STAT5 | 186042381 | 186043539 | 1,43 | ENSRNOG00000019960 | Ino80e      |
| P-STAT5 | 186042381 | 186043539 | 1,43 | ENSRNOG00000029061 | Hirip3      |
| P-STAT5 | 186457904 | 186459047 | 1,19 | ENSRNOG00000017201 | Cd2bp2      |
| P-STAT5 | 186477616 | 186478267 | 1,31 | ENSRNOG00000017804 | 01-wrz      |
| P-STAT5 | 186871922 | 186872696 | 1,31 | ENSRNOG00000018840 | Rnf40       |
| P-STAT5 | 186878362 | 186878896 | 1,62 | ENSRNOG00000028771 | LOC691909   |
| P-STAT5 | 187195113 | 187195557 | 1,56 | ENSRNOG00000019585 | Myst1       |
| P-STAT5 | 187215005 | 187215857 | 1,25 | ENSRNOG00000019616 | Prss8       |
| P-STAT5 | 191627495 | 191628025 | 1,62 | ENSRNOG00000015902 | Cpxm2       |
| P-STAT5 | 192082047 | 192082396 | 1,75 | ENSRNOG00000017097 | Lhpp        |
| P-STAT5 | 198864418 | 198865689 | 1,06 | ENSRNOG00000027582 | Dpysl4      |
| P-STAT5 | 199879052 | 199879481 | 1,87 | ENSRNOG00000018337 | Caly        |
| P-STAT5 | 199967858 | 199968915 | 1,56 | ENSRNOG00000018955 | Olr286      |
| P-STAT5 | 200326050 | 200326496 | 1,75 | ENSRNOG00000031626 | Olr297      |
| P-STAT5 | 200941441 | 200942185 | 1,87 | ENSRNOG00000024073 | LOC502372   |
| P-STAT5 | 201275395 | 201275754 | 1,62 | ENSRNOG00000015152 | Pkp3        |
| P-STAT5 | 201276205 | 201277039 | 1,43 | ENSRNOG00000015152 | Pkp3        |
| P-STAT5 | 201627084 | 201627516 | 1,62 | ENSRNOG00000018450 | Slc25a22    |
| P-STAT5 | 201645932 | 201646773 | 1,19 | ENSRNOG00000019199 | Efcab4a     |
| P-STAT5 | 201658423 | 201659692 | 1,12 | ENSRNOG00000029810 | Tspan4      |
| P-STAT5 | 202198358 | 202198507 | 1,93 | ENSRNOG00000020044 | Hcca2       |
| P-STAT5 | 202825242 | 202825583 | 1,68 | ENSRNOG00000040350 | rno-mir-675 |
| P-STAT5 | 202825242 | 202825583 | 1,68 | ENSRNOG00000020367 | Mir675      |
| P-STAT5 | 204171253 | 204171887 | 1,62 | ENSRNOG00000020735 | Mrgpre      |

|         |           |           |      |                    |            |
|---------|-----------|-----------|------|--------------------|------------|
| P-STAT5 | 204984760 | 204985289 | 1,68 | ENSRNOG00000020857 | Ppfia1     |
| P-STAT5 | 205289194 | 205289643 | 1,81 | ENSRNOG00000020890 | Q9JK55_RAT |
| P-STAT5 | 206457317 | 206457771 | 1,56 | ENSRNOG00000017512 | Aldh3b1    |
| P-STAT5 | 206457317 | 206457771 | 1,56 | ENSRNOG00000017703 | Unc93b1    |
| P-STAT5 | 206735265 | 206735824 | 1,56 | ENSRNOG00000021724 | Ptprcap    |
| P-STAT5 | 206735265 | 206735824 | 1,56 | ENSRNOG00000032303 | RL35A_RAT  |
| P-STAT5 | 206857719 | 206858379 | 1,31 | ENSRNOG00000018878 | Ssh3       |
| P-STAT5 | 207015957 | 207016805 | 1,56 | ENSRNOG00000019220 | Rhod       |
| P-STAT5 | 207208572 | 207209212 | 1,81 | ENSRNOG00000019356 | LOC688721  |
| P-STAT5 | 207669127 | 207669571 | 1,75 | ENSRNOG00000020133 | Rin1       |
| P-STAT5 | 207729690 | 207730057 | 1,81 | ENSRNOG00000020253 | RAB1B_RAT  |
| P-STAT5 | 207927495 | 207928467 | 1,31 | ENSRNOG00000020412 | Sf3b2      |
| P-STAT5 | 207927495 | 207928467 | 1,31 | ENSRNOG00000028743 | Gal3st3    |
| P-STAT5 | 207992269 | 207992801 | 1,5  | ENSRNOG00000020455 | Cst6       |
| P-STAT5 | 208558409 | 208559202 | 1,12 | ENSRNOG00000020904 | Cdc42ep2   |
| P-STAT5 | 208904111 | 208904665 | 1,75 | ENSRNOG00000021007 | Snx15      |
| P-STAT5 | 209054136 | 209054980 | 1,68 | ENSRNOG00000043503 | Ehd1       |
| P-STAT5 | 209079996 | 209080725 | 1,25 | ENSRNOG00000027456 | Cdc42bpg   |
| P-STAT5 | 209118605 | 209120056 | 1,56 | ENSRNOG00000021061 | Map4k2     |
| P-STAT5 | 209583348 | 209584604 | 1,37 | ENSRNOG00000021132 | RGD1309710 |
| P-STAT5 | 209599355 | 209599793 | 2    | ENSRNOG00000021139 | Esrra      |
| P-STAT5 | 210341190 | 210342223 | 1,56 | ENSRNOG00000021207 | Lgals12    |
| P-STAT5 | 210341190 | 210342223 | 1,56 | ENSRNOG00000023528 | Hrasls5    |
| P-STAT5 | 213233232 | 213234266 | 1,12 | ENSRNOG00000020872 | Cd5        |
| P-STAT5 | 226569137 | 226569981 | 1,56 | ENSRNOG00000030572 | Smc5       |
| P-STAT5 | 228097198 | 228097652 | 1,68 | ENSRNOG00000025476 | RGD1359349 |
| P-STAT5 | 232994719 | 232995323 | 1,68 | ENSRNOG00000015868 | Ins16      |
| P-STAT5 | 247073954 | 247074460 | 1,93 | ENSRNOG00000017230 | Cox15      |
| P-STAT5 | 250057281 | 250058441 | 1,25 | ENSRNOG00000014650 | Sema4g     |
| P-STAT5 | 261482678 | 261483212 | 1,81 | ENSRNOG00000015671 | Tectb      |
| P-STAT5 | 262554359 | 262554698 | 1,68 | ENSRNOG00000016659 | Habp2      |
| P-STAT5 | 4114764   | 4115433   | 1,33 | ENSRNOG00000002294 | Snx29      |
| P-STAT5 | 10562658  | 10563092  | 1,84 | ENSRNOG00000002930 | Ppl        |
| P-STAT5 | 10810040  | 10810389  | 1,52 | ENSRNOG00000003234 | Mgrn1      |
| P-STAT5 | 10810040  | 10810389  | 1,52 | ENSRNOG00000003324 | LOC363543  |
| P-STAT5 | 10810040  | 10810389  | 1,52 | ENSRNOG00000027368 | Fam100a    |
| P-STAT5 | 11069270  | 11069814  | 1,46 | ENSRNOG00000004608 | Magmas     |
| P-STAT5 | 11767364  | 11768213  | 1,33 | ENSRNOG00000006873 | Dnase1     |
| P-STAT5 | 11911760  | 11912129  | 1,52 | ENSRNOG00000007280 | NAT15_RAT  |
| P-STAT5 | 13003522  | 13004839  | 2,03 | ENSRNOG00000004122 | Kremen2    |
| P-STAT5 | 13003522  | 13004839  | 2,03 | ENSRNOG00000042258 | RGD1561157 |
| P-STAT5 | 13099708  | 13100247  | 1,65 | ENSRNOG00000029279 | Prss33     |
| P-STAT5 | 13287902  | 13288366  | 1,78 | ENSRNOG00000005336 | Prss27     |
| P-STAT5 | 13945723  | 13946760  | 1,27 | ENSRNOG00000025117 | Noxo1      |
| P-STAT5 | 13945723  | 13946760  | 1,27 | ENSRNOG00000012620 | Syngn3     |
| P-STAT5 | 14009081  | 14009840  | 1,46 | ENSRNOG00000014672 | Hs3st6     |
| P-STAT5 | 14058622  | 14059357  | 2,03 | ENSRNOG00000014711 | LOC681837  |
| P-STAT5 | 14141352  | 14142179  | 1,97 | ENSRNOG00000015749 | Nme3       |
| P-STAT5 | 14141352  | 14142179  | 1,97 | ENSRNOG00000015479 | Mrps34     |

|         |          |          |      |                     |           |
|---------|----------|----------|------|---------------------|-----------|
| P-STAT5 | 14614364 | 14615137 | 1,9  | ENSRNOG00000018701  | Tpsg1     |
| P-STAT5 | 14718827 | 14719459 | 1,33 | ENSRNOG00000018792  | Tekt4     |
| P-STAT5 | 14993516 | 14994345 | 1,14 | ENSRNOG00000023639  | Rpusd1    |
| P-STAT5 | 15093302 | 15094153 | 1,2  | ENSRNOG00000019729  | Jmjd8     |
| P-STAT5 | 15112995 | 15113840 | 1,58 | ENSRNOG00000019930  | Rhot2     |
| P-STAT5 | 15204830 | 15206080 | 1,52 | ENSRNOG00000020140  | Pigq      |
| P-STAT5 | 18473798 | 18474352 | 1,84 | ENSRNOG00000032417  | GBRP_RAT  |
| P-STAT5 | 35069476 | 35070357 | 1,2  | ENSRNOG00000002511  | Flt4      |
| P-STAT5 | 37124941 | 37125515 | 1,71 | ENSRNOG00000003645  | Hnrnpab   |
| P-STAT5 | 38751391 | 38752405 | 1,01 | ENSRNOG00000016596  | Hspa4     |
| P-STAT5 | 38751391 | 38752405 | 1,01 | ENSRNOG00000027662  | Gm5978    |
| P-STAT5 | 38886553 | 38886906 | 1,71 | ENSRNOG00000007218  | Leap2     |
| P-STAT5 | 44461316 | 44461861 | 1,65 | ENSRNOG00000031194  | Olr1431   |
| P-STAT5 | 44937658 | 44938795 | 1,27 | ENSRNOG00000031114  | Olr1451   |
| P-STAT5 | 44945755 | 44946219 | 1,71 | ENSRNOG00000033492  | Olr1452   |
| P-STAT5 | 44974864 | 44975328 | 1,58 | ENSRNOG00000029615  | Olr1453   |
| P-STAT5 | 44983535 | 44983986 | 1,71 | ENSRNOG00000031322  | Olr1454   |
| P-STAT5 | 45016316 | 45016974 | 1,71 | ENSRNOG00000033053  | Olr1456   |
| P-STAT5 | 45236837 | 45237788 | 1,65 | ENSRNOG00000043419  | Hist3h2ba |
| P-STAT5 | 46170882 | 46172153 | 1,39 | ENSRNOG00000003332  | Nt5m      |
| P-STAT5 | 46964299 | 46964933 | 1,39 | ENSRNOG00000005275  | Shmt1     |
| P-STAT5 | 47423013 | 47423972 | 1,08 | ENSRNOG00000002342  | Aldh3a2   |
| P-STAT5 | 55847933 | 55848267 | 1,58 | ENSRNOG00000006989  | Vamp2     |
| P-STAT5 | 56381648 | 56382807 | 1,58 | ENSRNOG00000010320  | Efnb3     |
| P-STAT5 | 57195219 | 57196259 | 1,01 | ENSRNOG00000019183  | Alox15    |
| P-STAT5 | 59320733 | 59321594 | 1,33 | ENSRNOG00000015210  | Ggt6      |
| P-STAT5 | 59320733 | 59321594 | 1,33 | ENSRNOG00000015236  | Mybbp1a   |
| P-STAT5 | 60108607 | 60109156 | 1,52 | ENSRNOG00000019486  | Trpv1     |
| P-STAT5 | 60713404 | 60714451 | 1,08 | ENSRNOG00000033558  | Olr1486   |
| P-STAT5 | 61306616 | 61307647 | 1,39 | ENSRNOG00000019898  | Olr1507   |
| P-STAT5 | 62756153 | 62756889 | 1,33 | ENSRNOG00000003233  | Serpinf2  |
| P-STAT5 | 62834178 | 62834570 | 1,58 | ENSRNOG00000037268  | Scarf1    |
| P-STAT5 | 62906548 | 62907177 | 1,97 | ENSRNOG00000003846  | Pitpna    |
| P-STAT5 | 63265299 | 63265947 | 1,71 | ENSRNOG00000006454  | Rph3al    |
| P-STAT5 | 64443711 | 64444159 | 1,65 | ENSRNOG00000023381  | LOC497959 |
| P-STAT5 | 65443038 | 65443362 | 1,58 | ENSRNOG00000012929  | Wsb1      |
| P-STAT5 | 65779243 | 65779793 | 1,84 | ENSRNOG00000014135  | Rab11fip4 |
| P-STAT5 | 65779243 | 65779793 | 1,84 | ENSRNOG000000045307 | U6        |
| P-STAT5 | 67403646 | 67403980 | 1,65 | ENSRNOG00000003971  | Gosr1     |
| P-STAT5 | 67501422 | 67502130 | 1,33 | ENSRNOG00000022239  | Tusc5     |
| P-STAT5 | 71104961 | 71105510 | 1,71 | ENSRNOG00000008264  | Fndc8     |
| P-STAT5 | 71930259 | 71930633 | 1,65 | ENSRNOG00000037097  | Expi      |
| P-STAT5 | 71974178 | 71974629 | 1,9  | ENSRNOG00000002542  | Heatr6    |
| P-STAT5 | 82852821 | 82853453 | 1,71 | ENSRNOG00000002828  | Tob1      |
| P-STAT5 | 83945821 | 83946559 | 1,39 | ENSRNOG00000004404  | Tac4      |
| P-STAT5 | 85737690 | 85738043 | 1,9  | ENSRNOG00000023551  | Sp6       |
| P-STAT5 | 88291882 | 88292441 | 1,71 | ENSRNOG00000030170  | Krt10     |
| P-STAT5 | 88330014 | 88330573 | 1,52 | ENSRNOG00000011986  | Krt12     |
| P-STAT5 | 88945433 | 88945787 | 1,84 | ENSRNOG00000013071  | Krt33a    |

|         |           |           |      |                     |            |
|---------|-----------|-----------|------|---------------------|------------|
| P-STAT5 | 88985593  | 88986140  | 1,58 | ENSRNOG00000013523  | Krt31      |
| P-STAT5 | 89060898  | 89061237  | 1,52 | ENSRNOG00000014070  | Krt13      |
| P-STAT5 | 89177711  | 89179097  | 1,58 | ENSRNOG00000014441  | Krt16      |
| P-STAT5 | 89297089  | 89297358  | 1,58 | ENSRNOG00000014819  | Hap1       |
| P-STAT5 | 89791622  | 89792170  | 1,52 | ENSRNOG00000019496  | Stat5a     |
| P-STAT5 | 92290682  | 92291126  | 1,65 | ENSRNOG00000003203  | Hexim1     |
| P-STAT5 | 92554744  | 92555378  | 1,58 | ENSRNOG00000028569  | Arhgap27   |
| P-STAT5 | 92800679  | 92801526  | 1,33 | ENSRNOG00000028436  | Rprml      |
| P-STAT5 | 92903293  | 92904242  | 1,01 | ENSRNOG00000003807  | Wnt9b      |
| P-STAT5 | 93367982  | 93368546  | 1,78 | ENSRNOG00000005104  | Imp5       |
| P-STAT5 | 106078282 | 106078670 | 1,52 | ENSRNOG00000033152  | RS18_RAT   |
| P-STAT5 | 106078282 | 106078670 | 1,52 | ENSRNOG00000005580  | Itgb4      |
| P-STAT5 | 107016936 | 107018062 | 0,95 | ENSRNOG00000024954  | Mgat5b     |
| P-STAT5 | 108432296 | 108432848 | 1,52 | ENSRNOG00000003259  | C1qtnf1    |
| P-STAT5 | 110056443 | 110056808 | 1,58 | ENSRNOG00000036680  | RGD1307119 |
| P-STAT5 | 110159393 | 110160138 | 1,71 | ENSRNOG00000036677  | Slc16a3    |
| P-STAT5 | 110395312 | 110395761 | 1,52 | ENSRNOG00000036669  | Uts2r      |
| P-STAT5 | 24327028  | 24327489  | 1,53 | ENSRNOG00000001551  | Atp5j      |
| P-STAT5 | 28105483  | 28106329  | 1,47 | ENSRNOG00000001575  | Grik1      |
| P-STAT5 | 28370421  | 28370775  | 1,9  | ENSRNOG00000027691  | Cldn17     |
| P-STAT5 | 29298238  | 29298902  | 1,41 | ENSRNOG00000043017  | Krtap7-1   |
| P-STAT5 | 33787505  | 33788272  | 1,47 | ENSRNOG00000001699  | Setd4      |
| P-STAT5 | 33787505  | 33788272  | 1,47 | ENSRNOG000000032165 | Cbr1       |
| P-STAT5 | 34151483  | 34151922  | 2,14 | ENSRNOG00000001691  | Cldn14     |
| P-STAT5 | 37464571  | 37465020  | 1,71 | ENSRNOG00000001959  | Mx1        |
| P-STAT5 | 56587050  | 56588113  | 0,98 | ENSRNOG00000002151  | TAGL3_RAT  |
| P-STAT5 | 57459954  | 57460516  | 1,47 | ENSRNOG00000039048  | Cd200r1    |
| P-STAT5 | 64970245  | 64970594  | 1,53 | ENSRNOG00000026008  | Gtf2e1     |
| P-STAT5 | 66152777  | 66153241  | 1,59 | ENSRNOG00000002265  | Casr       |
| P-STAT5 | 70107643  | 70108197  | 1,59 | ENSRNOG00000025055  | Zdhhc19    |
| P-STAT5 | 72377085  | 72378150  | 1,47 | ENSRNOG00000038539  | Lrrc15     |
| P-STAT5 | 79622316  | 79623769  | 1,16 | ENSRNOG00000021992  | Rtp1       |
| P-STAT5 | 80845046  | 80845495  | 1,47 | ENSRNOG00000001785  | Etv5       |
| P-STAT5 | 82532158  | 82532712  | 1,59 | ENSRNOG00000001715  | Ece2       |
| P-STAT5 | 82532158  | 82532712  | 1,59 | ENSRNOG00000001712  | Alg3       |
| P-STAT5 | 82591010  | 82591772  | 1,47 | ENSRNOG00000001709  | Ap2m1      |
| P-STAT5 | 82832397  | 82832951  | 1,47 | ENSRNOG00000023271  | PARL_RAT   |
| P-STAT5 | 82978403  | 82978762  | 1,59 | ENSRNOG00000001911  | Map6d1     |
| P-STAT5 | 1290508   | 1291558   | 0,95 | ENSRNOG00000001072  | Lass4      |
| P-STAT5 | 2489391   | 2490136   | 1,52 | ENSRNOG00000028259  | RGD1565374 |
| P-STAT5 | 2531273   | 2531647   | 1,72 | ENSRNOG00000000988  | Xab2       |
| P-STAT5 | 9780877   | 9781884   | 0,95 | ENSRNOG00000000990  | Pdap1      |
| P-STAT5 | 9950714   | 9951252   | 1,65 | ENSRNOG00000000999  | LOC690516  |
| P-STAT5 | 11006612  | 11007171  | 1,65 | ENSRNOG00000001036  | Rsph10b2   |
| P-STAT5 | 11075573  | 11076017  | 1,72 | ENSRNOG00000001050  | Eif2ak1    |
| P-STAT5 | 11343943  | 11344677  | 1,46 | ENSRNOG00000024605  | LOC498145  |
| P-STAT5 | 11590651  | 11590914  | 1,65 | ENSRNOG00000001089  | Zdhhc4     |
| P-STAT5 | 15659376  | 15659947  | 1,59 | ENSRNOG00000032917  | Zfand2a    |
| P-STAT5 | 16294362  | 16296128  | 1,84 | ENSRNOG00000032693  | LOC498155  |

|         |           |           |      |                     |            |
|---------|-----------|-----------|------|---------------------|------------|
| P-STAT5 | 16638821  | 16639586  | 1,27 | ENSRNOG00000039282  | MGC112692  |
| P-STAT5 | 16817491  | 16818950  | 1,78 | ENSRNOG00000001324  | Asmt       |
| P-STAT5 | 16817491  | 16818950  | 1,78 | ENSRNOG000000028166 | Asmtl      |
| P-STAT5 | 16832833  | 16833287  | 2,03 | ENSRNOG00000001325  | Il3ra      |
| P-STAT5 | 17282043  | 17282289  | 1,59 | ENSRNOG000000008372 | Vamp7      |
| P-STAT5 | 19586180  | 19586749  | 1,52 | ENSRNOG00000001410  | Gigyf1     |
| P-STAT5 | 19680516  | 19681261  | 1,46 | ENSRNOG000000025001 | Pcolce     |
| P-STAT5 | 21802238  | 21802380  | 1,97 | ENSRNOG00000001432  | Dtx2       |
| P-STAT5 | 22264030  | 22264374  | 1,84 | ENSRNOG00000001444  | Ccl26      |
| P-STAT5 | 29035632  | 29036387  | 1,91 | ENSRNOG000000000934 | Piwil1     |
| P-STAT5 | 32742258  | 32743189  | 1,4  | ENSRNOG00000001011  | Fam101a    |
| P-STAT5 | 33122366  | 33122900  | 1,78 | ENSRNOG00000001019  | Tect2      |
| P-STAT5 | 34213792  | 34214361  | 1,33 | ENSRNOG000000008544 | B3gnt4     |
| P-STAT5 | 34548736  | 34549387  | 2,16 | ENSRNOG00000001338  | Hpd        |
| P-STAT5 | 35390460  | 35390901  | 1,52 | ENSRNOG000000031731 | RGD1310861 |
| P-STAT5 | 36300491  | 36301571  | 1,02 | ENSRNOG00000001351  | Trafd1     |
| P-STAT5 | 36796890  | 36797641  | 1,4  | ENSRNOG000000024462 | Oas1d      |
| P-STAT5 | 39458279  | 39459389  | 1,65 | ENSRNOG00000001124  | Rnft2      |
| P-STAT5 | 39868428  | 39869187  | 1,33 | ENSRNOG00000001130  | Nos1       |
| P-STAT5 | 40430228  | 40430657  | 1,72 | ENSRNOG00000001135  | Wsb2       |
| P-STAT5 | 41407295  | 41408105  | 1,52 | ENSRNOG000000022392 | Hspb8      |
| P-STAT5 | 43012512  | 43013046  | 1,52 | ENSRNOG000000028814 | Oasl2      |
| P-STAT5 | 43370674  | 43371308  | 1,78 | ENSRNOG000000000691 | Foxn4      |
| P-STAT5 | 46033284  | 46034321  | 1,21 | ENSRNOG000000037483 | Ep400      |
| P-STAT5 | 31606598  | 31607168  | 1,63 | ENSRNOG000000007261 | Gli2       |
| P-STAT5 | 38441875  | 38442511  | 1,51 | ENSRNOG000000003453 | Lypd1      |
| P-STAT5 | 45529659  | 45529988  | 1,57 | ENSRNOG000000030515 | NFASC_RAT  |
| P-STAT5 | 48127401  | 48128159  | 1,32 | ENSRNOG000000006237 | Gpr37l1    |
| P-STAT5 | 48961613  | 48962242  | 1,51 | ENSRNOG000000010076 | Pkp1       |
| P-STAT5 | 49056819  | 49058423  | 1,26 | ENSRNOG000000010204 | Tmem9      |
| P-STAT5 | 53406598  | 53407169  | 1,76 | ENSRNOG000000013312 | Kcnt2      |
| P-STAT5 | 64620718  | 64621192  | 1,7  | ENSRNOG000000002517 | Pdc        |
| P-STAT5 | 67802625  | 67803159  | 1,7  | ENSRNOG000000028016 | Ncf2       |
| P-STAT5 | 68435158  | 68435681  | 1,51 | ENSRNOG000000002691 | RGD1305609 |
| P-STAT5 | 72784263  | 72785205  | 1,45 | ENSRNOG000000005229 | Sec16b     |
| P-STAT5 | 75613978  | 75614532  | 1,51 | ENSRNOG000000002569 | Mrps14     |
| P-STAT5 | 79823079  | 79823730  | 2,07 | ENSRNOG000000002776 | Sell       |
| P-STAT5 | 80694938  | 80695469  | 1,63 | ENSRNOG000000002964 | Xcl1       |
| P-STAT5 | 87267097  | 87267741  | 1,51 | ENSRNOG000000004022 | Klhdc9     |
| P-STAT5 | 87291010  | 87291466  | 1,57 | ENSRNOG000000004192 | Arhgap30   |
| P-STAT5 | 88055715  | 88056769  | 1,57 | ENSRNOG000000005166 | Nhlh1      |
| P-STAT5 | 88501379  | 88502033  | 1,32 | ENSRNOG000000008301 | Tagln2     |
| P-STAT5 | 99340194  | 99340729  | 2,01 | ENSRNOG000000003730 | LOC682999  |
| P-STAT5 | 99340194  | 99340729  | 2,01 | ENSRNOG000000003664 | RGD1307161 |
| P-STAT5 | 103082829 | 103083899 | 1,07 | ENSRNOG000000002501 | RGD1309586 |
| P-STAT5 | 106991927 | 106992816 | 1,19 | ENSRNOG000000003767 | Rps6kc1    |
| P-STAT5 | 638742    | 639710    | 1,61 | ENSRNOG000000033073 | Vom2r68    |
| P-STAT5 | 1913715   | 1914149   | 1,91 | ENSRNOG000000000065 | Pde6b      |
| P-STAT5 | 5615469   | 5616304   | 1,05 | ENSRNOG000000022032 | Abcg3l2    |

|         |           |           |      |                     |            |
|---------|-----------|-----------|------|---------------------|------------|
| P-STAT5 | 6540274   | 6540929   | 1,54 | ENSRNOG00000002154  | Mepe       |
| P-STAT5 | 6681019   | 6681653   | 1,42 | ENSRNOG00000002168  | Dspp       |
| P-STAT5 | 10076747  | 10077101  | 1,48 | ENSRNOG00000002165  | Fam175a    |
| P-STAT5 | 11887215  | 11888247  | 1,24 | ENSRNOG00000002361  | Prkg2      |
| P-STAT5 | 38107651  | 38108100  | 1,48 | ENSRNOG00000002302  | CORIN_RAT  |
| P-STAT5 | 39047416  | 39047859  | 1,67 | ENSRNOG00000002336  | Gabra4     |
| P-STAT5 | 45473136  | 45473584  | 1,48 | ENSRNOG00000002553  | RGD1311122 |
| P-STAT5 | 80450196  | 80450838  | 1,91 | ENSRNOG00000007599  | Afap1      |
| P-STAT5 | 80813082  | 80813947  | 0,99 | ENSRNOG00000008474  | Acox3      |
| P-STAT5 | 80813082  | 80813947  | 0,99 | ENSRNOG00000008898  | RGD1308380 |
| P-STAT5 | 81112362  | 81113391  | 1,3  | ENSRNOG00000009299  | Adra2c     |
| P-STAT5 | 82976825  | 82977989  | 1,05 | ENSRNOG00000006033  | SPON2_RAT  |
| P-STAT5 | 84136354  | 84136888  | 1,54 | ENSRNOG00000019361  | Inpp5j     |
| P-STAT5 | 84579050  | 84579405  | 1,54 | ENSRNOG00000004168  | Slc35e4    |
| P-STAT5 | 84664150  | 84664715  | 1,36 | ENSRNOG00000004555  | Sec14l4    |
| P-STAT5 | 84749975  | 84750824  | 1,3  | ENSRNOG00000004672  | Sec14l2    |
| P-STAT5 | 84784990  | 84785554  | 2,04 | ENSRNOG00000005218  | Sf3a1      |
| P-STAT5 | 86524988  | 86525817  | 1,3  | ENSRNOG00000013720  | Aebp1      |
| P-STAT5 | 86616022  | 86616446  | 1,48 | ENSRNOG00000014785  | Ykt6       |
| P-STAT5 | 87414707  | 87415539  | 1,36 | ENSRNOG00000008154  | Ramp3      |
| P-STAT5 | 92358390  | 92358756  | 1,54 | ENSRNOG000000037621 | RGD1309870 |
| P-STAT5 | 98152277  | 98153141  | 1,42 | ENSRNOG00000005982  | C1d        |
| P-STAT5 | 104446629 | 104448158 | 1,85 | ENSRNOG000000037532 | LOC690352  |
| P-STAT5 | 2618891   | 2619225   | 1,5  | ENSRNOG00000013112  | Dusp13     |
| P-STAT5 | 3828108   | 3829057   | 1,13 | ENSRNOG00000009274  | Fut11      |
| P-STAT5 | 3869497   | 3870233   | 1,57 | ENSRNOG000000040122 | Myoz1      |
| P-STAT5 | 4857331   | 4857754   | 1,5  | ENSRNOG00000000341  | Nid2       |
| P-STAT5 | 5673131   | 5673675   | 1,63 | ENSRNOG00000018148  | Cd99l2     |
| P-STAT5 | 6934668   | 6935335   | 1,57 | ENSRNOG00000014661  | LOC305691  |
| P-STAT5 | 9369080   | 9369841   | 1,32 | ENSRNOG00000006649  | Thrb       |
| P-STAT5 | 18518062  | 18518816  | 1,19 | ENSRNOG00000007320  | Fam3d      |
| P-STAT5 | 20065760  | 20066389  | 2,07 | ENSRNOG000000031307 | Ptgdr1     |
| P-STAT5 | 20066460  | 20067493  | 1,32 | ENSRNOG000000031307 | Ptgdr1     |
| P-STAT5 | 22614562  | 22615503  | 1,82 | ENSRNOG00000009785  | B2RZ50_RAT |
| P-STAT5 | 26461075  | 26461537  | 1,63 | ENSRNOG00000012497  | Olr1626    |
| P-STAT5 | 26612664  | 26613013  | 1,5  | ENSRNOG000000033349 | Olr1632    |
| P-STAT5 | 27036331  | 27036883  | 1,5  | ENSRNOG000000042612 | Rnase12    |
| P-STAT5 | 27051575  | 27051929  | 1,82 | ENSRNOG000000025640 | Olr1637    |
| P-STAT5 | 27114234  | 27115189  | 1,44 | ENSRNOG000000025597 | Rnase6     |
| P-STAT5 | 27259872  | 27260441  | 2,13 | ENSRNOG000000032879 | Rnase17    |
| P-STAT5 | 27272787  | 27273137  | 1,94 | ENSRNOG000000031445 | Ear11      |
| P-STAT5 | 27476226  | 27476777  | 2,13 | ENSRNOG00000011615  | Olr1638    |
| P-STAT5 | 32671133  | 32671880  | 1,76 | ENSRNOG00000013317  | RGD1565222 |
| P-STAT5 | 33035371  | 33035700  | 1,88 | ENSRNOG00000016804  | Il25       |
| P-STAT5 | 33035371  | 33035700  | 1,88 | ENSRNOG00000016828  | Cmtm5      |
| P-STAT5 | 33754183  | 33754622  | 1,38 | ENSRNOG00000019503  | Rec8       |
| P-STAT5 | 34167631  | 34168180  | 1,5  | ENSRNOG000000024785 | Mcpt4      |
| P-STAT5 | 34481533  | 34481851  | 1,44 | ENSRNOG000000032717 | Mcpt10     |
| P-STAT5 | 35178661  | 35179290  | 1,63 | ENSRNOG000000030018 | Gzmc       |

|         |           |           |      |                    |             |
|---------|-----------|-----------|------|--------------------|-------------|
| P-STAT5 | 35178661  | 35179290  | 1,63 | ENSRNOG00000041132 | SNORA17     |
| P-STAT5 | 36465776  | 36466126  | 1,57 | ENSRNOG00000009278 | Ift88       |
| P-STAT5 | 36764068  | 36765382  | 1,57 | ENSRNOG00000010544 | Lats2       |
| P-STAT5 | 36865898  | 36866831  | 1,32 | ENSRNOG00000021847 | SKA3_RAT    |
| P-STAT5 | 36865898  | 36866831  | 1,32 | ENSRNOG00000010855 | Mrp63       |
| P-STAT5 | 39867649  | 39868025  | 1,63 | ENSRNOG00000013876 | Mipep       |
| P-STAT5 | 45380010  | 45380576  | 1,63 | ENSRNOG00000016177 | Scara3      |
| P-STAT5 | 46172865  | 46173919  | 1,57 | ENSRNOG00000009522 | Adra1a<i><s |
| P-STAT5 | 47635987  | 47636346  | 1,76 | ENSRNOG00000013658 | Nefl        |
| P-STAT5 | 49857634  | 49858190  | 1,38 | ENSRNOG00000021823 | Herv-frd    |
| P-STAT5 | 54208618  | 54209159  | 1,57 | ENSRNOG00000025239 | Nudt15      |
| P-STAT5 | 56031956  | 56032700  | 1,44 | ENSRNOG00000010319 | Lcp1        |
| P-STAT5 | 61265323  | 61266202  | 1,57 | ENSRNOG00000013280 | Olfm4       |
| P-STAT5 | 79771340  | 79772688  | 1,13 | ENSRNOG00000031100 | Klhl1       |
| P-STAT5 | 106308239 | 106309663 | 1,57 | ENSRNOG00000011511 | Stk24       |
| P-STAT5 | 109300922 | 109301366 | 1,82 | ENSRNOG00000009288 | Fgf14       |
| P-STAT5 | 5061104   | 5061653   | 1,57 | ENSRNOG00000031287 | Cacna2d3    |
| P-STAT5 | 6358722   | 6359146   | 1,75 | ENSRNOG00000017689 | Itih3       |
| P-STAT5 | 6780292   | 6781266   | 1,07 | ENSRNOG00000019273 | Capn7       |
| P-STAT5 | 7615198   | 7615451   | 1,57 | ENSRNOG00000039786 | Msemb       |
| P-STAT5 | 9711364   | 9713214   | 1,44 | ENSRNOG00000020270 | Anxa8       |
| P-STAT5 | 9787380   | 9787909   | 1,57 | ENSRNOG00000020282 | Ppyr1       |
| P-STAT5 | 10009540  | 10010577  | 1    | ENSRNOG00000010401 | Fam25a      |
| P-STAT5 | 10034255  | 10034607  | 1,57 | ENSRNOG00000010437 | Sncg        |
| P-STAT5 | 17686059  | 17687311  | 1,19 | ENSRNOG00000011912 | Tmem38a     |
| P-STAT5 | 17686059  | 17687311  | 1,19 | ENSRNOG00000042037 | LOC688495   |
| P-STAT5 | 18430002  | 18430346  | 1,75 | ENSRNOG00000016256 | Myo9b       |
| P-STAT5 | 18554557  | 18555024  | 1,69 | ENSRNOG00000017071 | MGC94542    |
| P-STAT5 | 18790261  | 18791230  | 1,13 | ENSRNOG00000018326 | Pgls        |
| P-STAT5 | 19043177  | 19043509  | 1,57 | ENSRNOG00000040987 | SNORA68     |
| P-STAT5 | 19043177  | 19043509  | 1,57 | ENSRNOG00000018822 | Slc5a5      |
| P-STAT5 | 19044075  | 19045627  | 1    | ENSRNOG00000040987 | SNORA68     |
| P-STAT5 | 19044075  | 19045627  | 1    | ENSRNOG00000018822 | Slc5a5      |
| P-STAT5 | 19105184  | 19106013  | 1,69 | ENSRNOG00000019009 | Arrdc2      |
| P-STAT5 | 19167029  | 19167676  | 1,57 | ENSRNOG00000019228 | Pik3r2      |
| P-STAT5 | 19406871  | 19407541  | 1,44 | ENSRNOG00000019944 | Fkbp8       |
| P-STAT5 | 19426613  | 19427147  | 1,63 | ENSRNOG00000019990 | RGD1566239  |
| P-STAT5 | 19837447  | 19838288  | 1,19 | ENSRNOG00000042237 | Tm6sf2      |
| P-STAT5 | 20100672  | 20101306  | 1,5  | ENSRNOG00000027257 | Gmip        |
| P-STAT5 | 47627139  | 47627588  | 1,57 | ENSRNOG00000030889 | Cldn22      |
| P-STAT5 | 47627139  | 47627588  | 1,57 | ENSRNOG00000031521 | RGD1562043  |
| P-STAT5 | 50244661  | 50244905  | 1,69 | ENSRNOG00000014118 | Klkb1       |
| P-STAT5 | 62355125  | 62355587  | 1,63 | ENSRNOG00000015182 | Ppp2cb      |
| P-STAT5 | 80999448  | 80999782  | 1,63 | ENSRNOG00000018543 | Atp4b       |
| P-STAT5 | 81107081  | 81107420  | 1,5  | ENSRNOG00000019473 | Dcun1d2     |
| P-STAT5 | 9343040   | 9343521   | 1,6  | ENSRNOG00000017946 | Ctsq        |
| P-STAT5 | 14282974  | 14283818  | 1,29 | ENSRNOG00000011984 | Cxcl14      |
| P-STAT5 | 15072386  | 15072727  | 1,6  | ENSRNOG00000021886 | B4galt7     |
| P-STAT5 | 15151050  | 15151693  | 1,54 | ENSRNOG00000013564 | Dok3        |

|         |          |          |      |                    |            |
|---------|----------|----------|------|--------------------|------------|
| P-STAT5 | 15211309 | 15212420 | 1,17 | ENSRNOG00000021447 | Prr7       |
| P-STAT5 | 15251880 | 15252439 | 1,97 | ENSRNOG00000015139 | F12        |
| P-STAT5 | 15349918 | 15350687 | 1,48 | ENSRNOG00000016539 | Q5BK70_RAT |
| P-STAT5 | 20264267 | 20265196 | 1,23 | ENSRNOG00000030027 | Fbxw17     |
| P-STAT5 | 23693942 | 23694391 | 1,85 | ENSRNOG00000016468 | Tpmt       |
| P-STAT5 | 50119833 | 50120374 | 1,48 | ENSRNOG00000032499 | LOC682649  |
| P-STAT5 | 50119833 | 50120374 | 1,48 | ENSRNOG00000030526 | LOC680312  |
| P-STAT5 | 50544785 | 50545324 | 1,54 | ENSRNOG00000027810 | Olr1657    |
| P-STAT5 | 51205874 | 51206408 | 1,36 | ENSRNOG00000018622 | Trim27     |
| P-STAT5 | 75587927 | 75589097 | 1,11 | ENSRNOG00000016885 | Klf6       |
| P-STAT5 | 84352943 | 84353552 | 1,29 | ENSRNOG00000017981 | Mcm10      |
| P-STAT5 | 16371434 | 16372073 | 1,31 | ENSRNOG00000015301 | Elp2       |
| P-STAT5 | 25010827 | 25011162 | 1,5  | ENSRNOG00000029939 | Gypc       |
| P-STAT5 | 25035018 | 25035467 | 1,75 | ENSRNOG00000025687 | LOC498836  |
| P-STAT5 | 26872809 | 26873669 | 1,43 | ENSRNOG00000025489 | Pkd2l2     |
| P-STAT5 | 28483922 | 28484561 | 1,31 | ENSRNOG00000032878 | LOC681300  |
| P-STAT5 | 29320421 | 29321250 | 1,5  | ENSRNOG00000017849 | Apbb3      |
| P-STAT5 | 30150304 | 30151439 | 1,25 | ENSRNOG00000029244 | Pcdhb6     |
| P-STAT5 | 30316253 | 30317225 | 1,56 | ENSRNOG00000033123 | Pcdhb20    |
| P-STAT5 | 30635422 | 30636064 | 1,37 | ENSRNOG00000027277 | Pcdhga8    |
| P-STAT5 | 30635422 | 30636064 | 1,37 | ENSRNOG00000039457 | LOC680448  |
| P-STAT5 | 30641502 | 30642582 | 1,06 | ENSRNOG00000030352 | Pcdhga9    |
| P-STAT5 | 30645633 | 30646662 | 1,31 | ENSRNOG00000039455 | Pcdhgb6    |
| P-STAT5 | 30645633 | 30646662 | 1,31 | ENSRNOG00000030352 | Pcdhga9    |
| P-STAT5 | 30660236 | 30660767 | 1,62 | ENSRNOG00000039454 | Pcdhgb7    |
| P-STAT5 | 30660236 | 30660767 | 1,62 | ENSRNOG00000027232 | Pcdhga11   |
| P-STAT5 | 30670725 | 30671169 | 1,5  | ENSRNOG00000019799 | Pcdhgc3    |
| P-STAT5 | 30674055 | 30674589 | 1,56 | ENSRNOG00000019799 | Pcdhgc3    |
| P-STAT5 | 35781013 | 35781367 | 1,5  | ENSRNOG00000027103 | Gpr151     |
| P-STAT5 | 71002779 | 71003513 | 1,37 | ENSRNOG00000015275 | Ska1       |
| P-STAT5 | 71002779 | 71003513 | 1,37 | ENSRNOG00000014614 | Cxxc1      |
| P-STAT5 | 71587852 | 71588281 | 1,56 | ENSRNOG00000044215 | SCARNA18   |
| P-STAT5 | 71587852 | 71588281 | 1,56 | ENSRNOG00000045060 | SCARNA17   |
| P-STAT5 | 71587852 | 71588281 | 1,56 | ENSRNOG00000013766 | Acaa2      |
| P-STAT5 | 71815095 | 71815648 | 1,62 | ENSRNOG00000018694 | Lipg       |
| P-STAT5 | 77044764 | 77045428 | 2,06 | ENSRNOG00000017667 | Adnp2      |
| P-STAT5 | 78873600 | 78874239 | 1,56 | ENSRNOG00000016654 | Galr1      |
| P-STAT5 | 312052   | 313006   | 1,51 | ENSRNOG00000012343 | Pdp2       |
| P-STAT5 | 10164867 | 10165533 | 2,2  | ENSRNOG00000013216 | RGD1305215 |
| P-STAT5 | 10164867 | 10165533 | 2,2  | ENSRNOG00000013460 | Zfp319     |
| P-STAT5 | 10606723 | 10607857 | 1,7  | ENSRNOG00000015720 | Polr2c     |
| P-STAT5 | 21889215 | 21890224 | 1,57 | ENSRNOG00000015666 | Abcc12     |
| P-STAT5 | 23125166 | 23125733 | 1,32 | ENSRNOG00000024043 | Orc6l      |
| P-STAT5 | 23125166 | 23125733 | 1,32 | ENSRNOG00000017612 | Vps35      |
| P-STAT5 | 23126681 | 23127516 | 1,32 | ENSRNOG00000024043 | Orc6l      |
| P-STAT5 | 23193060 | 23193319 | 1,51 | ENSRNOG00000017868 | Olr1666    |
| P-STAT5 | 25822956 | 25823210 | 1,57 | ENSRNOG00000005619 | RGD1310262 |
| P-STAT5 | 26438319 | 26438671 | 1,76 | ENSRNOG00000003755 | Clgn       |
| P-STAT5 | 26499361 | 26499888 | 2,02 | ENSRNOG00000003695 | RGD1310572 |

|         |           |           |      |                    |             |
|---------|-----------|-----------|------|--------------------|-------------|
| P-STAT5 | 35139891  | 35140225  | 2,08 | ENSRNOG00000015974 | Tmem208     |
| P-STAT5 | 49587946  | 49588495  | 1,51 | ENSRNOG00000014415 | Hsbp1       |
| P-STAT5 | 49633836  | 49634355  | 1,51 | ENSRNOG00000014522 | Mlycd       |
| P-STAT5 | 50131979  | 50132672  | 1,32 | ENSRNOG00000016257 | Cotl1       |
| P-STAT5 | 53738884  | 53739825  | 1,39 | ENSRNOG00000038193 | B6ZGR5_RAT  |
| P-STAT5 | 53738884  | 53739825  | 1,39 | ENSRNOG00000017209 | Tubb3       |
| P-STAT5 | 54183688  | 54184274  | 1,64 | ENSRNOG00000017993 | Abcb10      |
| P-STAT5 | 56213519  | 56214178  | 1,64 | ENSRNOG00000019937 | Kcnk1       |
| P-STAT5 | 31144076  | 31145090  | 1,49 | ENSRNOG00000018067 | Smn1        |
| P-STAT5 | 32675099  | 32676436  | 1,24 | ENSRNOG00000018903 | P85A_RAT    |
| P-STAT5 | 33604773  | 33605002  | 1,61 | ENSRNOG00000010266 | Cd180       |
| P-STAT5 | 41673510  | 41674049  | 1,92 | ENSRNOG00000011623 | Rab3c       |
| P-STAT5 | 44704148  | 44704798  | 1,73 | ENSRNOG00000039582 | RGD1561161  |
| P-STAT5 | 53400980  | 53401939  | 1,42 | ENSRNOG00000014550 | RGD1308448  |
| P-STAT5 | 55859208  | 55859853  | 1,3  | ENSRNOG00000013886 | Fyb         |
| P-STAT5 | 60391141  | 60391890  | 1,92 | ENSRNOG00000023126 | Rxfp3       |
| P-STAT5 | 92165717  | 92166256  | 1,79 | ENSRNOG00000023829 | LOC365732   |
| P-STAT5 | 92165717  | 92166256  | 1,79 | ENSRNOG00000022511 | tGap1       |
| P-STAT5 | 96353844  | 96354199  | 1,67 | ENSRNOG00000011973 | Ii7         |
| P-STAT5 | 127830012 | 127830457 | 1,67 | ENSRNOG00000013569 | Q7TNZ0_RAT  |
| P-STAT5 | 144014186 | 144014946 | 1,55 | ENSRNOG00000000091 | Smad9       |
| P-STAT5 | 145734797 | 145735741 | 1,55 | ENSRNOG00000025908 | Eif3i-ps1   |
| P-STAT5 | 175614843 | 175615920 | 1,3  | ENSRNOG00000009822 | Tlr2        |
| P-STAT5 | 179172470 | 179173340 | 1,18 | ENSRNOG00000016408 | Kirrel      |
| P-STAT5 | 180109594 | 180110562 | 1,05 | ENSRNOG00000018870 | Hapln2      |
| P-STAT5 | 181400053 | 181400510 | 1,55 | ENSRNOG00000036423 | rno-mir-92b |
| P-STAT5 | 181400053 | 181400510 | 1,55 | ENSRNOG00000020539 | B2GV31_RAT  |
| P-STAT5 | 181445365 | 181445839 | 1,61 | ENSRNOG00000020554 | Rag1ap1     |
| P-STAT5 | 181711755 | 181712212 | 1,49 | ENSRNOG00000020706 | Kcnn3       |
| P-STAT5 | 181716031 | 181716585 | 1,49 | ENSRNOG00000020706 | Kcnn3       |
| P-STAT5 | 189314182 | 189314519 | 1,79 | ENSRNOG00000043445 | RGD1562059  |
| P-STAT5 | 189854140 | 189855375 | 1,11 | ENSRNOG00000021012 | Rfx5        |
| P-STAT5 | 190165349 | 190166138 | 1,61 | ENSRNOG00000021116 | Bnipl       |
| P-STAT5 | 190198777 | 190199311 | 1,79 | ENSRNOG00000021131 | Fam63a      |
| P-STAT5 | 190532776 | 190533505 | 1,67 | ENSRNOG00000021166 | Ecm1        |
| P-STAT5 | 190972810 | 190973267 | 1,49 | ENSRNOG00000021181 | Sf3b4       |
| P-STAT5 | 192189288 | 192189760 | 1,55 | ENSRNOG00000017664 | Olr390      |
| P-STAT5 | 192852031 | 192852484 | 2,1  | ENSRNOG00000018835 | Notch2      |
| P-STAT5 | 201154045 | 201154729 | 1,55 | ENSRNOG00000015788 | Adora3      |
| P-STAT5 | 203498232 | 203498966 | 1,67 | ENSRNOG00000018937 | Gstm7       |
| P-STAT5 | 203510594 | 203511533 | 1,11 | ENSRNOG00000019017 | Gstm6       |
| P-STAT5 | 203552329 | 203553213 | 1,61 | ENSRNOG00000019094 | Gstm2       |
| P-STAT5 | 204668434 | 204669023 | 1,67 | ENSRNOG00000027522 | LOC691448   |
| P-STAT5 | 232763928 | 232764576 | 1,36 | ENSRNOG00000014490 | Bdh2        |
| P-STAT5 | 243151911 | 243153580 | 0,99 | ENSRNOG00000014059 | Odf2l       |
| P-STAT5 | 244431015 | 244431957 | 1,67 | ENSRNOG00000015260 | Lpar3       |
| P-STAT5 | 250649740 | 250650573 | 1,73 | ENSRNOG00000042880 | Gipc2       |
| P-STAT5 | 427106    | 427772    | 1,33 | ENSRNOG00000033616 | Olr1687     |
| P-STAT5 | 788655    | 789089    | 1,52 | ENSRNOG00000040159 | Olr1705     |

|         |          |          |      |                     |              |
|---------|----------|----------|------|---------------------|--------------|
| P-STAT5 | 788655   | 789089   | 1,52 | ENSRNOG00000000741  | LOC686477    |
| P-STAT5 | 1461573  | 1462012  | 1,52 | ENSRNOG000000029420 | Olr1744      |
| P-STAT5 | 1703250  | 1703710  | 1,52 | ENSRNOG000000000781 | Rnf39        |
| P-STAT5 | 2644868  | 2645417  | 1,84 | ENSRNOG000000042949 | LOC684097    |
| P-STAT5 | 2785623  | 2786569  | 1,14 | ENSRNOG000000029386 | RT1-N1       |
| P-STAT5 | 2794431  | 2795295  | 1,39 | ENSRNOG000000032664 | RT1-O1       |
| P-STAT5 | 2794431  | 2795295  | 1,39 | ENSRNOG000000029001 | RT1-S2       |
| P-STAT5 | 2829008  | 2830109  | 1,2  | ENSRNOG000000042905 | RT1-T24-4    |
| P-STAT5 | 3226495  | 3226931  | 1,96 | ENSRNOG000000000833 | Vars2        |
| P-STAT5 | 3468246  | 3469216  | 1,27 | ENSRNOG000000030251 | RT1-CE10     |
| P-STAT5 | 3538565  | 3539108  | 1,77 | ENSRNOG000000039744 | RT1-CE4      |
| P-STAT5 | 3578705  | 3579344  | 1,52 | ENSRNOG000000029579 | RT1-CE2      |
| P-STAT5 | 3596792  | 3597321  | 1,77 | ENSRNOG000000021604 | RT1-CE12     |
| P-STAT5 | 3627320  | 3627879  | 1,71 | ENSRNOG000000000839 | Nfkbil1      |
| P-STAT5 | 3627320  | 3627879  | 1,71 | ENSRNOG000000000840 | Atp6v1g2     |
| P-STAT5 | 3627320  | 3627879  | 1,71 | ENSRNOG000000000841 | Bat1         |
| P-STAT5 | 3627320  | 3627879  | 1,71 | ENSRNOG000000034667 | SNORD83      |
| P-STAT5 | 3657265  | 3657823  | 1,84 | ENSRNOG000000000838 | Lta          |
| P-STAT5 | 3657265  | 3657823  | 1,84 | ENSRNOG000000000837 | Tnf          |
| P-STAT5 | 3766580  | 3767919  | 1,14 | ENSRNOG000000027516 | Ly6g5b       |
| P-STAT5 | 3766580  | 3767919  | 1,14 | ENSRNOG000000000848 | Bat4         |
| P-STAT5 | 3768580  | 3768929  | 1,65 | ENSRNOG000000027516 | Ly6g5b       |
| P-STAT5 | 3768580  | 3768929  | 1,65 | ENSRNOG000000000848 | Bat4         |
| P-STAT5 | 3830701  | 3831649  | 1,2  | ENSRNOG000000000842 | Ddah2        |
| P-STAT5 | 4032702  | 4033412  | 1,39 | ENSRNOG000000030630 | Ehmt2        |
| P-STAT5 | 4403202  | 4404471  | 1,39 | ENSRNOG000000029340 | Btnl8        |
| P-STAT5 | 4760924  | 4761827  | 1,84 | ENSRNOG000000000454 | RT1-DOb      |
| P-STAT5 | 4954166  | 4955215  | 1,14 | ENSRNOG000000000463 | Col11a2      |
| P-STAT5 | 4962543  | 4963006  | 1,9  | ENSRNOG000000035653 | rno-mir-219- |
| P-STAT5 | 4962543  | 4963006  | 1,9  | ENSRNOG000000000466 | Hsd17b8      |
| P-STAT5 | 4962543  | 4963006  | 1,9  | ENSRNOG000000000464 | Rxrb         |
| P-STAT5 | 5054354  | 5054693  | 1,58 | ENSRNOG000000038999 | RT1-A1       |
| P-STAT5 | 5057560  | 5057829  | 1,96 | ENSRNOG000000038999 | RT1-A1       |
| P-STAT5 | 5081493  | 5082222  | 1,39 | ENSRNOG000000044418 | U6           |
| P-STAT5 | 5081493  | 5082222  | 1,39 | ENSRNOG000000028505 | Rps18        |
| P-STAT5 | 5094789  | 5095538  | 1,14 | ENSRNOG000000000473 | Pfdn6        |
| P-STAT5 | 5098405  | 5099608  | 1,27 | ENSRNOG000000000473 | Pfdn6        |
| P-STAT5 | 5098405  | 5099608  | 1,27 | ENSRNOG000000031171 | Wdr46        |
| P-STAT5 | 5100308  | 5101066  | 1,08 | ENSRNOG000000031171 | Wdr46        |
| P-STAT5 | 5962552  | 5963691  | 0,95 | ENSRNOG000000029402 | LOC499407    |
| P-STAT5 | 7376347  | 7377112  | 1,39 | ENSRNOG000000000521 | Cdkn1a       |
| P-STAT5 | 8031412  | 8032745  | 1,65 | ENSRNOG000000000531 | LOC689755    |
| P-STAT5 | 9221613  | 9222574  | 1,58 | ENSRNOG000000001152 | GLP1R_RAT    |
| P-STAT5 | 9226175  | 9226738  | 1,65 | ENSRNOG000000001152 | GLP1R_RAT    |
| P-STAT5 | 9511740  | 9512512  | 1,71 | ENSRNOG000000001162 | Tff2         |
| P-STAT5 | 9533868  | 9534797  | 0,95 | ENSRNOG000000001164 | Tff1         |
| P-STAT5 | 11174986 | 11175515 | 1,84 | ENSRNOG000000042329 | LOC690375    |
| P-STAT5 | 11180991 | 11181555 | 1,58 | ENSRNOG000000042383 | LOC690386    |
| P-STAT5 | 11219365 | 11220055 | 1,58 | ENSRNOG000000042636 | LOC687622    |

|         |          |          |      |                    |            |
|---------|----------|----------|------|--------------------|------------|
| P-STAT5 | 11222519 | 11223073 | 2,73 | ENSRNOG00000042636 | LOC687622  |
| P-STAT5 | 11263239 | 11263492 | 1,84 | ENSRNOG00000042797 | LOC690460  |
| P-STAT5 | 13191909 | 13192456 | 1,84 | ENSRNOG00000006589 | Mif        |
| P-STAT5 | 14173068 | 14173322 | 1,58 | ENSRNOG00000001313 | Gnaz       |
| P-STAT5 | 17281293 | 17281724 | 1,58 | ENSRNOG00000000607 | RGD1559903 |
| P-STAT5 | 27485920 | 27486267 | 2,03 | ENSRNOG00000000572 | Chst3      |
| P-STAT5 | 29840228 | 29840777 | 1,58 | ENSRNOG00000000395 | LOC606294  |
| P-STAT5 | 43075029 | 43075458 | 1,71 | ENSRNOG00000042125 | Lama4      |
| P-STAT5 | 46574436 | 46575322 | 1,33 | ENSRNOG00000037647 | Ostm1      |
| P-STAT5 | 46769422 | 46769858 | 1,65 | ENSRNOG00000000315 | LOC365595  |
| P-STAT5 | 46769422 | 46769858 | 1,65 | ENSRNOG00000026110 | Scml4      |
| P-STAT5 | 3038685  | 3038949  | 1,36 | ENSRNOG00000004560 | Cacna1b    |
| P-STAT5 | 3339160  | 3340209  | 1,3  | ENSRNOG00000009354 | Nrarp      |
| P-STAT5 | 3437107  | 3437541  | 1,61 | ENSRNOG00000011093 | B2RZ20_RAT |
| P-STAT5 | 3437107  | 3437541  | 1,61 | ENSRNOG00000011295 | Anapc2     |
| P-STAT5 | 3567342  | 3567979  | 2,11 | ENSRNOG00000013895 | Npdc1      |
| P-STAT5 | 3856682  | 3857530  | 1,3  | ENSRNOG00000042407 | Lcn13      |
| P-STAT5 | 3886977  | 3887516  | 1,86 | ENSRNOG00000033758 | Lcn11      |
| P-STAT5 | 5807544  | 5808088  | 1,55 | ENSRNOG00000005059 | Med22      |
| P-STAT5 | 5807544  | 5808088  | 1,55 | ENSRNOG00000005071 | RGD1563311 |
| P-STAT5 | 5807544  | 5808088  | 1,55 | ENSRNOG00000035951 | SNORD24    |
| P-STAT5 | 5807544  | 5808088  | 1,55 | ENSRNOG00000036176 | snR47      |
| P-STAT5 | 5807544  | 5808088  | 1,55 | ENSRNOG00000034505 | SNORD36    |
| P-STAT5 | 5807544  | 5808088  | 1,55 | ENSRNOG00000044935 | SNORD36    |
| P-STAT5 | 5903820  | 5905121  | 1,05 | ENSRNOG00000005840 | RGD1311501 |
| P-STAT5 | 7020417  | 7020947  | 1,74 | ENSRNOG00000009342 | Fcnb       |
| P-STAT5 | 7642760  | 7644107  | 1,43 | ENSRNOG00000011470 | Tsc1       |
| P-STAT5 | 9458040  | 9459494  | 1,18 | ENSRNOG00000018457 | Ppp2r4     |
| P-STAT5 | 10912989 | 10913333 | 1,61 | ENSRNOG00000009532 | Qrfp       |
| P-STAT5 | 10986632 | 10987601 | 1,24 | ENSRNOG00000009769 | Lamc3      |
| P-STAT5 | 11289021 | 11289650 | 1,86 | ENSRNOG00000010217 | Bat2l      |
| P-STAT5 | 13436158 | 13436612 | 1,49 | ENSRNOG00000017583 | Mapkap1    |
| P-STAT5 | 13845578 | 13846550 | 1,12 | ENSRNOG00000018687 | Fbxw2      |
| P-STAT5 | 14165456 | 14166369 | 1,67 | ENSRNOG00000022033 | RGD1308742 |
| P-STAT5 | 14165456 | 14166369 | 1,67 | ENSRNOG00000022015 | Cep110     |
| P-STAT5 | 14478658 | 14479474 | 1,24 | ENSRNOG00000039210 | LOC502618  |
| P-STAT5 | 15341118 | 15341857 | 1,12 | ENSRNOG00000007415 | Ptgs1      |
| P-STAT5 | 16421585 | 16422017 | 1,8  | ENSRNOG00000007954 | Olr417     |
| P-STAT5 | 16610729 | 16611068 | 1,49 | ENSRNOG00000007986 | Olr425     |
| P-STAT5 | 34262654 | 34262893 | 1,49 | ENSRNOG00000027447 | Stam2      |
| P-STAT5 | 37068450 | 37069190 | 2,11 | ENSRNOG00000005369 | Kcnj3      |
| P-STAT5 | 41183910 | 41184801 | 1,18 | ENSRNOG00000005743 | Dapl1      |
| P-STAT5 | 41363649 | 41363973 | 1,67 | ENSRNOG00000025394 | TANC1_RAT  |
| P-STAT5 | 53378242 | 53378594 | 1,92 | ENSRNOG00000009620 | Cybrd1     |
| P-STAT5 | 55817050 | 55817579 | 1,49 | ENSRNOG00000018657 | Q5I0K6_RAT |
| P-STAT5 | 68113125 | 68114574 | 1,18 | ENSRNOG00000021513 | Rtn4rl2    |
| P-STAT5 | 68365967 | 68366430 | 1,43 | ENSRNOG00000009227 | Aplnr      |
| P-STAT5 | 68426889 | 68427532 | 1,49 | ENSRNOG00000028266 | Lrrc55     |
| P-STAT5 | 73900320 | 73901469 | 0,93 | ENSRNOG00000031282 | Olr704     |

|         |           |           |      |                     |            |
|---------|-----------|-----------|------|---------------------|------------|
| P-STAT5 | 75618270  | 75619331  | 1,24 | ENSRNOG00000014429  | Arfgap2    |
| P-STAT5 | 76018940  | 76020230  | 2,11 | ENSRNOG00000016325  | F2         |
| P-STAT5 | 76791401  | 76792194  | 1,18 | ENSRNOG00000006938  | Mapk8ip1   |
| P-STAT5 | 76794045  | 76794922  | 0,99 | ENSRNOG00000006938  | Mapk8ip1   |
| P-STAT5 | 77876507  | 77876946  | 1,49 | ENSRNOG00000000047  | Cd82       |
| P-STAT5 | 89438574  | 89439033  | 1,49 | ENSRNOG00000042821  | Cd59       |
| P-STAT5 | 91124028  | 91125323  | 1,24 | ENSRNOG00000004410  | Pax6       |
| P-STAT5 | 91716099  | 91717248  | 1,3  | ENSRNOG00000022178  | Dcdc5      |
| P-STAT5 | 99864866  | 99865422  | 1,49 | ENSRNOG00000008337  | Gjd2       |
| P-STAT5 | 106528886 | 106530328 | 1,49 | ENSRNOG00000007447  | Pla2g4b    |
| P-STAT5 | 106946851 | 106947402 | 1,55 | ENSRNOG00000008609  | Capn3      |
| P-STAT5 | 112367342 | 112367690 | 1,74 | ENSRNOG00000005158  | Slc24a5    |
| P-STAT5 | 112423934 | 112424673 | 1,86 | ENSRNOG00000005258  | Myef2      |
| P-STAT5 | 112978794 | 112979254 | 1,55 | ENSRNOG00000008452  | Eid1       |
| P-STAT5 | 116566981 | 116567914 | 1,43 | ENSRNOG00000017647  | Zc3h8      |
| P-STAT5 | 116730296 | 116730627 | 1,98 | ENSRNOG00000018491  | B0BMY5_RAT |
| P-STAT5 | 117620894 | 117621393 | 1,55 | ENSRNOG00000006753  | Tgm3       |
| P-STAT5 | 118538434 | 118538763 | 2,23 | ENSRNOG00000021240  | Atrn       |
| P-STAT5 | 118714323 | 118715385 | 1,43 | ENSRNOG00000021241  | Gfra4      |
| P-STAT5 | 118911956 | 118912494 | 1,55 | ENSRNOG00000021249  | RGD1561852 |
| P-STAT5 | 119705100 | 119705634 | 1,98 | ENSRNOG00000021260  | Prnd       |
| P-STAT5 | 120147264 | 120147818 | 1,61 | ENSRNOG00000021266  | Prokr2     |
| P-STAT5 | 133100446 | 133100595 | 1,92 | ENSRNOG00000007972  | RBBP9_RAT  |
| P-STAT5 | 133100446 | 133100595 | 1,92 | ENSRNOG00000027574  | RGD1561178 |
| P-STAT5 | 133100446 | 133100595 | 1,92 | ENSRNOG00000008411  | Sec23b     |
| P-STAT5 | 137151111 | 137151445 | 1,67 | ENSRNOG00000004641  | Sstr4      |
| P-STAT5 | 138286438 | 138287394 | 1,55 | ENSRNOG00000005489  | LOC678760  |
| P-STAT5 | 142786432 | 142786881 | 1,55 | ENSRNOG00000023477  | Defb23     |
| P-STAT5 | 143099788 | 143101118 | 1,55 | ENSRNOG00000007827  | Cox4i2     |
| P-STAT5 | 143297177 | 143297641 | 1,67 | ENSRNOG00000008534  | B4F7B7_RAT |
| P-STAT5 | 143579268 | 143579886 | 1,8  | ENSRNOG00000026770  | Tsply3     |
| P-STAT5 | 145755273 | 145756253 | 2,17 | ENSRNOG00000025443  | Map1lc3a   |
| P-STAT5 | 145755273 | 145756253 | 2,17 | ENSRNOG000000041537 | U2         |
| P-STAT5 | 146115643 | 146116629 | 1,86 | ENSRNOG00000018997  | Myh7b      |
| P-STAT5 | 149353703 | 149354257 | 1,49 | ENSRNOG00000023989  | Actr5      |
| P-STAT5 | 151578329 | 151578568 | 1,8  | ENSRNOG00000027988  | Zhx3       |
| P-STAT5 | 154407552 | 154408106 | 1,12 | ENSRNOG00000027432  | R3hdml     |
| P-STAT5 | 155122358 | 155122804 | 1,55 | ENSRNOG00000013760  | Wfdc5      |
| P-STAT5 | 155293642 | 155294271 | 1,61 | ENSRNOG00000029508  | Slpil2     |
| P-STAT5 | 155632969 | 155633938 | 1,43 | ENSRNOG00000031823  | Wfdc6b     |
| P-STAT5 | 155686300 | 155686559 | 1,36 | ENSRNOG00000026067  | Wfdc10     |
| P-STAT5 | 155807364 | 155807913 | 1,49 | ENSRNOG00000015155  | Tnnc2      |
| P-STAT5 | 157300139 | 157301093 | 0,93 | ENSRNOG00000006052  | Sulf2      |
| P-STAT5 | 158163112 | 158163661 | 1,86 | ENSRNOG00000008081  | Ddx27      |
| P-STAT5 | 158448351 | 158448923 | 2,11 | ENSRNOG00000008283  | B4galt5    |
| P-STAT5 | 158793736 | 158794405 | 1,61 | ENSRNOG00000025580  | Ube2v1     |
| P-STAT5 | 158822061 | 158822510 | 1,49 | ENSRNOG00000025114  | Cebpb      |
| P-STAT5 | 162925033 | 162925472 | 1,49 | ENSRNOG00000004372  | Cbln4      |
| P-STAT5 | 163158610 | 163159552 | 1,49 | ENSRNOG00000004451  | Mc3r       |

|         |           |           |      |                    |             |
|---------|-----------|-----------|------|--------------------|-------------|
| P-STAT5 | 163284485 | 163285339 | 1,12 | ENSRNOG00000004775 | Cstf1       |
| P-STAT5 | 163378470 | 163379010 | 1,55 | ENSRNOG00000005235 | RGD1307805  |
| P-STAT5 | 164139274 | 164140923 | 1,92 | ENSRNOG00000006184 | Pmepa1      |
| P-STAT5 | 170326520 | 170327064 | 1,55 | ENSRNOG00000012722 | Ppdpf       |
| P-STAT5 | 170501633 | 170502671 | 0,93 | ENSRNOG00000014235 | Lime1       |
| P-STAT5 | 170567087 | 170567841 | 1,86 | ENSRNOG00000014592 | Btbd4       |
| P-STAT5 | 2197747   | 2198276   | 1,55 | ENSRNOG00000006120 | Shh         |
| P-STAT5 | 2716696   | 2717225   | 1,74 | ENSRNOG00000007066 | Htr5a       |
| P-STAT5 | 5928457   | 5928986   | 1,92 | ENSRNOG00000010077 | Smarcd3     |
| P-STAT5 | 6115639   | 6116093   | 1,86 | ENSRNOG00000008017 | Cdk5        |
| P-STAT5 | 6425273   | 6425925   | 1,61 | ENSRNOG00000010453 | Klhl7       |
| P-STAT5 | 15568002  | 15568543  | 1,68 | ENSRNOG00000033531 | Cacna2d1    |
| P-STAT5 | 16781231  | 16781660  | 2,05 | ENSRNOG00000006631 | Sema3e      |
| P-STAT5 | 47541929  | 47542855  | 1,68 | ENSRNOG00000029610 | Kcnd2       |
| P-STAT5 | 54903808  | 54904259  | 1,61 | ENSRNOG00000021468 | Grm8        |
| P-STAT5 | 57545680  | 57546653  | 1,43 | ENSRNOG00000010725 | Cpa1        |
| P-STAT5 | 62244668  | 62245818  | 1,49 | ENSRNOG00000026965 | Tmem140     |
| P-STAT5 | 62265695  | 62267129  | 1,18 | ENSRNOG00000026958 | LOC500077   |
| P-STAT5 | 62727802  | 62728476  | 1,06 | ENSRNOG00000011184 | Slc13a4     |
| P-STAT5 | 68046663  | 68047354  | 1,8  | ENSRNOG00000012195 | Tas2r108    |
| P-STAT5 | 70260913  | 70261382  | 1,55 | ENSRNOG00000031457 | Olr802      |
| P-STAT5 | 70272664  | 70273333  | 1,49 | ENSRNOG00000029329 | Olr803      |
| P-STAT5 | 70674519  | 70674773  | 1,43 | ENSRNOG00000029299 | Olr808      |
| P-STAT5 | 76078282  | 76078746  | 1,74 | ENSRNOG00000026874 | RGD1304879  |
| P-STAT5 | 76528772  | 76529415  | 1,68 | ENSRNOG00000007707 | Znf467      |
| P-STAT5 | 76528772  | 76529415  | 1,68 | ENSRNOG00000025848 | Sspo        |
| P-STAT5 | 76919540  | 76920469  | 1,43 | ENSRNOG00000008465 | Tmem176b    |
| P-STAT5 | 76919540  | 76920469  | 1,43 | ENSRNOG00000023708 | Tmem176a    |
| P-STAT5 | 83452060  | 83453209  | 0,99 | ENSRNOG00000010629 | Nod1        |
| P-STAT5 | 83452060  | 83453209  | 0,99 | ENSRNOG00000040470 | SNORA17     |
| P-STAT5 | 84132176  | 84133345  | 1,3  | ENSRNOG00000011808 | Ghrhr       |
| P-STAT5 | 106148469 | 106148909 | 1,92 | ENSRNOG00000014753 | Tcf7l1      |
| P-STAT5 | 116609441 | 116610301 | 1,43 | ENSRNOG00000005853 | Tacr1       |
| P-STAT5 | 117930309 | 117931168 | 1,12 | ENSRNOG00000013573 | Atp6v1b1    |
| P-STAT5 | 118753066 | 118753875 | 1,06 | ENSRNOG00000015076 | Cyp26b1     |
| P-STAT5 | 121700169 | 121701143 | 1,74 | ENSRNOG00000009347 | Arhgap25    |
| P-STAT5 | 122972402 | 122972761 | 1,55 | ENSRNOG00000016255 | Podxl2      |
| P-STAT5 | 126000958 | 126001681 | 1,61 | ENSRNOG00000009726 | Grip2       |
| P-STAT5 | 126101114 | 126101481 | 1,49 | ENSRNOG00000022155 | RGD1560289  |
| P-STAT5 | 131785025 | 131785583 | 1,61 | ENSRNOG00000005830 | Fam19a4     |
| P-STAT5 | 148293896 | 148295135 | 1,24 | ENSRNOG00000005798 | Cav3        |
| P-STAT5 | 149321137 | 149321991 | 1,49 | ENSRNOG00000009153 | Cidec       |
| P-STAT5 | 149348628 | 149348972 | 1,49 | ENSRNOG00000009204 | Il17re      |
| P-STAT5 | 159005418 | 159006272 | 1,74 | ENSRNOG00000015478 | aicda       |
| P-STAT5 | 159336678 | 159337036 | 1,49 | ENSRNOG00000009211 | C3ar1       |
| P-STAT5 | 160712625 | 160713152 | 1,49 | ENSRNOG00000011796 | C1r         |
| P-STAT5 | 160988371 | 160989042 | 1,43 | ENSRNOG00000016143 | Gpr162      |
| P-STAT5 | 161041438 | 161042297 | 1,74 | ENSRNOG00000021334 | Lag3        |
| P-STAT5 | 161041438 | 161042297 | 1,74 | ENSRNOG00000037131 | A230083G16f |

|         |           |           |      |                    |            |
|---------|-----------|-----------|------|--------------------|------------|
| P-STAT5 | 161113929 | 161114402 | 1,49 | ENSRNOG00000017052 | RGD1304952 |
| P-STAT5 | 161118645 | 161118990 | 2,48 | ENSRNOG00000017052 | RGD1304952 |
| P-STAT5 | 161260908 | 161261352 | 1,61 | ENSRNOG00000018533 | Iffo1      |
| P-STAT5 | 161263507 | 161264051 | 1,61 | ENSRNOG00000018533 | Iffo1      |
| P-STAT5 | 161444520 | 161446049 | 1,37 | ENSRNOG00000019368 | Scnn1a     |
| P-STAT5 | 165387506 | 165387744 | 1,55 | ENSRNOG00000028517 | MGC94282   |
| P-STAT5 | 165819853 | 165820482 | 1,55 | ENSRNOG00000032553 | RGD1562831 |
| P-STAT5 | 168504615 | 168504874 | 1,37 | ENSRNOG00000031551 | Ly49i6     |
| P-STAT5 | 170512095 | 170512819 | 1,37 | ENSRNOG00000021313 | Grpcb      |
| P-STAT5 | 170804553 | 170804812 | 1,37 | ENSRNOG00000032724 | Tas2r109   |
| P-STAT5 | 171670972 | 171671706 | 1,3  | ENSRNOG00000006628 | Dusp16     |
| P-STAT5 | 184214374 | 184214698 | 1,49 | ENSRNOG00000001817 | Tm7sf3     |
| P-STAT5 | 14054502  | 14055138  | 1,32 | ENSRNOG00000007647 | Oprk1      |
| P-STAT5 | 16928833  | 16929095  | 1,76 | ENSRNOG00000008180 | Lyn        |
| P-STAT5 | 19260642  | 19260981  | 2,01 | ENSRNOG00000009114 | Fam110b    |
| P-STAT5 | 22485475  | 22486335  | 1,26 | ENSRNOG00000032172 | RGD1566027 |
| P-STAT5 | 57686234  | 57687183  | 1,57 | ENSRNOG00000024539 | Ndufb6     |
| P-STAT5 | 58313769  | 58314098  | 1,7  | ENSRNOG00000008252 | Spink4     |
| P-STAT5 | 59140928  | 59141380  | 1,51 | ENSRNOG00000039556 | RGD1306576 |
| P-STAT5 | 59243402  | 59243904  | 1,95 | ENSRNOG00000034290 | Ccl21b     |
| P-STAT5 | 59925903  | 59926888  | 1,13 | ENSRNOG00000017485 | Cd72       |
| P-STAT5 | 59969252  | 59970371  | 0,94 | ENSRNOG00000017253 | Ccdc107    |
| P-STAT5 | 59969252  | 59970371  | 0,94 | ENSRNOG00000021546 | Sit1       |
| P-STAT5 | 60041123  | 60041669  | 1,45 | ENSRNOG00000016452 | Creb3      |
| P-STAT5 | 60041123  | 60041669  | 1,45 | ENSRNOG00000016630 | Tln1       |
| P-STAT5 | 60178447  | 60179486  | 1,13 | ENSRNOG00000015652 | Olr833     |
| P-STAT5 | 60315616  | 60316066  | 1,57 | ENSRNOG00000030761 | Olr840     |
| P-STAT5 | 62310896  | 62311338  | 1,76 | ENSRNOG00000011497 | Aldh1b1    |
| P-STAT5 | 66368738  | 66369301  | 1,7  | ENSRNOG00000006087 | Rnf20      |
| P-STAT5 | 74647049  | 74647881  | 1,32 | ENSRNOG00000016621 | Actl7b     |
| P-STAT5 | 74647049  | 74647881  | 1,32 | ENSRNOG00000016641 | Actl7a     |
| P-STAT5 | 79152914  | 79153551  | 1,57 | ENSRNOG00000013609 | Zfp37      |
| P-STAT5 | 79623629  | 79625504  | 1,38 | ENSRNOG00000043997 | U4         |
| P-STAT5 | 105735742 | 105736588 | 1,19 | ENSRNOG00000007060 | Adfp       |
| P-STAT5 | 107734028 | 107734779 | 1,45 | ENSRNOG00000005772 | Ptplad2    |
| P-STAT5 | 116510726 | 116511085 | 1,57 | ENSRNOG00000042224 | Cyp2j10    |
| P-STAT5 | 129420530 | 129421314 | 1,13 | ENSRNOG00000010636 | RGD1305274 |
| P-STAT5 | 135461936 | 135462964 | 1,32 | ENSRNOG00000008161 | Pdzk1ip1   |
| P-STAT5 | 136189741 | 136190183 | 1,57 | ENSRNOG00000010835 | Dmbx1      |
| P-STAT5 | 138008927 | 138009534 | 1,63 | ENSRNOG00000019407 | Dmap1      |
| P-STAT5 | 138350617 | 138351081 | 1,95 | ENSRNOG00000019609 | B4galt2    |
| P-STAT5 | 138360136 | 138360805 | 1,82 | ENSRNOG00000019735 | Dph2       |
| P-STAT5 | 138738157 | 138739601 | 1,63 | ENSRNOG00000019977 | Ptprf      |
| P-STAT5 | 138917187 | 138917630 | 1,57 | ENSRNOG00000028415 | Cdc20      |
| P-STAT5 | 139167174 | 139167733 | 1,76 | ENSRNOG00000007161 | Olr857     |
| P-STAT5 | 139350472 | 139351808 | 1,26 | ENSRNOG00000032760 | Olr865     |
| P-STAT5 | 141447184 | 141448303 | 1,26 | ENSRNOG00000011171 | Rims3      |
| P-STAT5 | 141589898 | 141590457 | 1,63 | ENSRNOG00000011421 | Smap2      |
| P-STAT5 | 143022683 | 143023381 | 1,19 | ENSRNOG00000026646 | Ndufs5     |

|         |           |           |      |                    |            |
|---------|-----------|-----------|------|--------------------|------------|
| P-STAT5 | 143104521 | 143105057 | 1,51 | ENSRNOG00000026592 | Rhbdl2     |
| P-STAT5 | 144182413 | 144182946 | 1,51 | ENSRNOG00000042421 | RGD1559909 |
| P-STAT5 | 144182413 | 144182946 | 1,51 | ENSRNOG00000025424 | Yrdc       |
| P-STAT5 | 146635248 | 146635581 | 1,7  | ENSRNOG00000014302 | Dlgap3     |
| P-STAT5 | 146802950 | 146803994 | 1,89 | ENSRNOG00000014408 | Gjb5       |
| P-STAT5 | 146802950 | 146803994 | 1,89 | ENSRNOG00000026910 | Gjb4       |
| P-STAT5 | 148650642 | 148651407 | 1,19 | ENSRNOG00000008693 | Tssk3      |
| P-STAT5 | 151443270 | 151443817 | 1,51 | ENSRNOG00000007021 | ZDH18_RAT  |
| P-STAT5 | 151859150 | 151859782 | 1,7  | ENSRNOG00000008600 | Sytl1      |
| P-STAT5 | 152766849 | 152767399 | 1,95 | ENSRNOG00000015384 | Lin28      |
| P-STAT5 | 152992584 | 152993055 | 1,95 | ENSRNOG00000016392 | Znf593     |
| P-STAT5 | 153263654 | 153264507 | 1,26 | ENSRNOG00000022054 | Paqr7      |
| P-STAT5 | 153263654 | 153264507 | 1,26 | ENSRNOG00000022030 | LOC689656  |
| P-STAT5 | 153462962 | 153463791 | 1,51 | ENSRNOG00000017087 | Man1c1     |
| P-STAT5 | 154218502 | 154218951 | 1,89 | ENSRNOG00000018576 | Rcan3      |
| P-STAT5 | 154262024 | 154262673 | 1,7  | ENSRNOG00000037165 | Npal3      |
| P-STAT5 | 154262024 | 154262673 | 1,7  | ENSRNOG00000031448 | MGC114440  |
| P-STAT5 | 155188656 | 155189596 | 1,26 | ENSRNOG00000012038 | Htr1d      |
| P-STAT5 | 155656515 | 155656984 | 1,63 | ENSRNOG00000012749 | C1qb       |
| P-STAT5 | 157538258 | 157538697 | 1,51 | ENSRNOG00000027731 | Ubx3       |
| P-STAT5 | 157792504 | 157792755 | 1,51 | ENSRNOG00000017401 | TMCO4_RAT  |
| P-STAT5 | 158150523 | 158150866 | 1,51 | ENSRNOG00000018097 | RGD1310427 |
| P-STAT5 | 158401719 | 158402465 | 1,07 | ENSRNOG00000042417 | Iffo2      |
| P-STAT5 | 160067596 | 160068220 | 1,51 | ENSRNOG00000023346 | RGD1561421 |
| P-STAT5 | 160183406 | 160184361 | 1,26 | ENSRNOG00000009222 | Epha2      |
| P-STAT5 | 160624199 | 160624760 | 1,57 | ENSRNOG00000012274 | Ddi2       |
| P-STAT5 | 160754278 | 160754722 | 1,51 | ENSRNOG00000013745 | Ctrc       |
| P-STAT5 | 165062766 | 165063416 | 2,01 | ENSRNOG00000008141 | Nppb       |
| P-STAT5 | 165229785 | 165230349 | 1,57 | ENSRNOG00000009217 | Fbxo6      |
| P-STAT5 | 167201742 | 167202476 | 1,51 | ENSRNOG00000017528 | Gpr157     |
| P-STAT5 | 167353984 | 167354625 | 1,51 | ENSRNOG00000021355 | Car6       |
| P-STAT5 | 168139408 | 168139748 | 1,51 | ENSRNOG00000018393 | Uts2       |
| P-STAT5 | 169217440 | 169218090 | 1,32 | ENSRNOG00000026840 | Thap3      |
| P-STAT5 | 169259305 | 169260269 | 1,76 | ENSRNOG00000009595 | Hkr3       |
| P-STAT5 | 169299058 | 169299513 | 1,7  | ENSRNOG00000022694 | Plekhg5    |
| P-STAT5 | 169384605 | 169385149 | 1,95 | ENSRNOG00000010270 | Espn       |
| P-STAT5 | 169384605 | 169385149 | 1,95 | ENSRNOG00000010490 | Hes2       |
| P-STAT5 | 169682865 | 169683922 | 1,26 | ENSRNOG00000023112 | LOC500594  |
| P-STAT5 | 172730978 | 172731422 | 1,82 | ENSRNOG00000022455 | Gltpd1     |
| P-STAT5 | 173063922 | 173065276 | 1,26 | ENSRNOG00000020295 | RGD1311019 |
| P-STAT5 | 2557397   | 2557855   | 2    | ENSRNOG00000040287 | Cyp1b1     |
| P-STAT5 | 3885486   | 3885950   | 1,81 | ENSRNOG00000007907 | Tmem178    |
| P-STAT5 | 7213692   | 7214642   | 1,31 | ENSRNOG00000031263 | Hhao       |
| P-STAT5 | 10394602  | 10395359  | 1,31 | ENSRNOG00000015566 | Atp6v1e2   |
| P-STAT5 | 10409779  | 10410073  | 1,69 | ENSRNOG00000015559 | LOC500613  |
| P-STAT5 | 10409779  | 10410073  | 1,69 | ENSRNOG00000015415 | Rhoq       |
| P-STAT5 | 10550024  | 10550570  | 1,56 | ENSRNOG00000028504 | Socs5      |
| P-STAT5 | 22666321  | 22666775  | 2,25 | ENSRNOG00000039902 | LOC683626  |
| P-STAT5 | 25440832  | 25441976  | 1,5  | ENSRNOG00000008047 | Khk        |

|         |           |           |      |                    |            |
|---------|-----------|-----------|------|--------------------|------------|
| P-STAT5 | 25910883  | 25911217  | 1,5  | ENSRNOG00000009905 | RGD1559683 |
| P-STAT5 | 25910883  | 25911217  | 1,5  | ENSRNOG00000009967 | Otof       |
| P-STAT5 | 26343003  | 26343437  | 1,5  | ENSRNOG00000011394 | Kif3c      |
| P-STAT5 | 40296769  | 40297303  | 1,69 | ENSRNOG00000004377 | Lpin1      |
| P-STAT5 | 49209895  | 49210139  | 1,5  | ENSRNOG00000006364 | Dld        |
| P-STAT5 | 55895503  | 55896129  | 1,5  | ENSRNOG00000006588 | Meox2      |
| P-STAT5 | 75812111  | 75812471  | 1,81 | ENSRNOG00000030869 | Aldoa1     |
| P-STAT5 | 78803674  | 78804424  | 1,31 | ENSRNOG00000022714 | Sstr1      |
| P-STAT5 | 101726558 | 101726892 | 1,37 | ENSRNOG00000010914 | Pigh       |
| P-STAT5 | 105163148 | 105163998 | 1,19 | ENSRNOG00000029871 | Slc8a3     |
| P-STAT5 | 107803230 | 107803779 | 1,5  | ENSRNOG00000009448 | Papln      |
| P-STAT5 | 108928761 | 108929021 | 1,81 | ENSRNOG00000012094 | Ltbp2      |
| P-STAT5 | 109334745 | 109334994 | 1,44 | ENSRNOG00000027115 | Fam164c    |
| P-STAT5 | 109708170 | 109709135 | 0,94 | ENSRNOG00000008224 | Jdp2       |
| P-STAT5 | 124379445 | 124379870 | 1,5  | ENSRNOG00000040566 | SNORA40    |
| P-STAT5 | 124379445 | 124379870 | 1,5  | ENSRNOG00000003951 | Psmc1      |
| P-STAT5 | 128043597 | 128044446 | 1,31 | ENSRNOG00000011141 | Serpina11  |
| P-STAT5 | 128954991 | 128955818 | 1,5  | ENSRNOG00000011044 | Clmn       |
| P-STAT5 | 129741949 | 129742475 | 1,75 | ENSRNOG00000004454 | Bdkrb2     |
| P-STAT5 | 133038530 | 133038864 | 1,5  | ENSRNOG00000011716 | Degs2      |
| P-STAT5 | 133191913 | 133192267 | 1,69 | ENSRNOG00000003020 | Hdmcp      |
| P-STAT5 | 133233126 | 133234075 | 0,94 | ENSRNOG00000004359 | Wars       |
| P-STAT5 | 133239880 | 133240250 | 1,5  | ENSRNOG00000029037 | RGD1566027 |
| P-STAT5 | 135403772 | 135404221 | 1,62 | ENSRNOG00000007184 | RGD1305298 |
| P-STAT5 | 135723048 | 135723949 | 1,94 | ENSRNOG00000008056 | Ankrd9     |
| P-STAT5 | 135856935 | 135857790 | 1,19 | ENSRNOG00000042191 | Rcor1      |
| P-STAT5 | 137349991 | 137350439 | 1,56 | ENSRNOG00000013128 | RGD1310269 |
| P-STAT5 | 143307866 | 143308588 | 1,69 | ENSRNOG00000004268 | Zfp386     |
| P-STAT5 | 1290669   | 1291708   | 1,89 | ENSRNOG00000031993 | Prim1      |
| P-STAT5 | 1659436   | 1659881   | 1,7  | ENSRNOG00000029571 | Coq10a     |
| P-STAT5 | 2101276   | 2102330   | 1,13 | ENSRNOG00000006844 | Dnajc14    |
| P-STAT5 | 2275321   | 2275690   | 1,51 | ENSRNOG00000007927 | Mettl7b    |
| P-STAT5 | 9688058   | 9688810   | 1,45 | ENSRNOG00000005370 | S1pr4      |
| P-STAT5 | 9707914   | 9708588   | 1,32 | ENSRNOG00000004695 | Bruno15    |
| P-STAT5 | 9882614   | 9883358   | 1,45 | ENSRNOG00000039852 | RGD1563634 |
| P-STAT5 | 9913502   | 9913937   | 1,51 | ENSRNOG00000020577 | PI51C_RAT  |
| P-STAT5 | 9913502   | 9913937   | 1,51 | ENSRNOG00000020501 | Tjp3       |
| P-STAT5 | 9937569   | 9937818   | 1,64 | ENSRNOG00000020466 | Apba3      |
| P-STAT5 | 9937569   | 9937818   | 1,64 | ENSRNOG00000020464 | Mrpl54     |
| P-STAT5 | 9948304   | 9949428   | 1,45 | ENSRNOG00000020431 | Matk       |
| P-STAT5 | 10018114  | 10019969  | 1,38 | ENSRNOG00000035271 | SNORD37    |
| P-STAT5 | 10018114  | 10019969  | 1,38 | ENSRNOG00000020383 | Dapk3      |
| P-STAT5 | 10021477  | 10022110  | 1,64 | ENSRNOG00000020266 | Eef2       |
| P-STAT5 | 10021477  | 10022110  | 1,64 | ENSRNOG00000035271 | SNORD37    |
| P-STAT5 | 10093334  | 10093888  | 1,82 | ENSRNOG00000020005 | Map2k2     |
| P-STAT5 | 10409806  | 10410535  | 1,32 | ENSRNOG00000032951 | Jsrp1      |
| P-STAT5 | 10546277  | 10546833  | 1,32 | ENSRNOG00000029028 | Mknk2      |
| P-STAT5 | 11202954  | 11203709  | 1,51 | ENSRNOG00000013220 | Hmha1      |
| P-STAT5 | 11401472  | 11402216  | 1,51 | ENSRNOG00000010423 | LOC500797  |

|         |           |           |      |                     |            |
|---------|-----------|-----------|------|---------------------|------------|
| P-STAT5 | 11517410  | 11517849  | 1,89 | ENSRNOG00000008414  | Bsg        |
| P-STAT5 | 11669313  | 11669647  | 1,76 | ENSRNOG00000000175  | Mier2      |
| P-STAT5 | 12604587  | 12605157  | 1,57 | ENSRNOG000000028512 | Ilvbl      |
| P-STAT5 | 13600507  | 13601136  | 1,51 | ENSRNOG000000004786 | Cyp4f1     |
| P-STAT5 | 13779227  | 13779572  | 1,89 | ENSRNOG000000026582 | RGD1310212 |
| P-STAT5 | 16268117  | 16269777  | 1,45 | ENSRNOG000000007545 | Angptl4    |
| P-STAT5 | 21307119  | 21307553  | 1,51 | ENSRNOG000000007587 | Tcp11l2    |
| P-STAT5 | 25361123  | 25361468  | 2,01 | ENSRNOG000000005720 | Spic       |
| P-STAT5 | 30655096  | 30655545  | 1,76 | ENSRNOG000000005556 | Snrpf      |
| P-STAT5 | 35117919  | 35118745  | 1,19 | ENSRNOG000000004635 | Kera       |
| P-STAT5 | 49908147  | 49908481  | 1,76 | ENSRNOG000000003772 | Csrp2      |
| P-STAT5 | 50541426  | 50542075  | 2,14 | ENSRNOG000000004019 | Phlda1     |
| P-STAT5 | 51326614  | 51327460  | 1,45 | ENSRNOG000000026634 | Glipr1l1   |
| P-STAT5 | 51326614  | 51327460  | 1,45 | ENSRNOG000000004077 | Kcnc2      |
| P-STAT5 | 54876969  | 54877944  | 1,32 | ENSRNOG000000004221 | Lgr5       |
| P-STAT5 | 56261270  | 56262346  | 1,76 | ENSRNOG000000005362 | Rab3ip     |
| P-STAT5 | 56385642  | 56386491  | 1,32 | ENSRNOG000000005555 | Lrrc10     |
| P-STAT5 | 57055304  | 57056238  | 1,13 | ENSRNOG000000027622 | Slc35e3    |
| P-STAT5 | 61870895  | 61871359  | 1,89 | ENSRNOG000000004421 | Tmem5      |
| P-STAT5 | 67138690  | 67139825  | 1,26 | ENSRNOG000000029465 | RGD1564851 |
| P-STAT5 | 67244980  | 67245724  | 1,38 | ENSRNOG000000006209 | Mbd6       |
| P-STAT5 | 67244980  | 67245724  | 1,38 | ENSRNOG000000006789 | Ddit3      |
| P-STAT5 | 67748098  | 67748845  | 1,7  | ENSRNOG000000004311 | Gpr182     |
| P-STAT5 | 67748098  | 67748845  | 1,7  | ENSRNOG000000029651 | Rdh2       |
| P-STAT5 | 67831284  | 67831894  | 1,32 | ENSRNOG000000004391 | Rdh7       |
| P-STAT5 | 72309457  | 72310431  | 1,19 | ENSRNOG000000008195 | 1433Z_RAT  |
| P-STAT5 | 77512779  | 77513207  | 1,95 | ENSRNOG000000007999 | Abra       |
| P-STAT5 | 88165155  | 88165418  | 1,64 | ENSRNOG000000004387 | Utp23      |
| P-STAT5 | 90945754  | 90946303  | 1,57 | ENSRNOG000000008615 | Mal2       |
| P-STAT5 | 95051633  | 95052604  | 1,07 | ENSRNOG000000007896 | Klhl38     |
| P-STAT5 | 111405375 | 111406024 | 1,32 | ENSRNOG000000007795 | Gpr20      |
| P-STAT5 | 113018667 | 113019006 | 1,51 | ENSRNOG000000006598 | Cyp11b3    |
| P-STAT5 | 113150343 | 113151017 | 1,57 | ENSRNOG000000007091 | Ly6e       |
| P-STAT5 | 113534466 | 113535598 | 1,13 | ENSRNOG000000007475 | Gpihbp1    |
| P-STAT5 | 113621037 | 113621581 | 1,51 | ENSRNOG000000007500 | Top1mt     |
| P-STAT5 | 113929282 | 113929939 | 1,19 | ENSRNOG000000008708 | Pycrl      |
| P-STAT5 | 114373630 | 114373966 | 1,95 | ENSRNOG000000012348 | Exosc4     |
| P-STAT5 | 114398235 | 114398569 | 1,76 | ENSRNOG000000013514 | Maf1       |
| P-STAT5 | 114503750 | 114504194 | 1,7  | ENSRNOG000000021812 | Scx        |
| P-STAT5 | 114591033 | 114592872 | 1,26 | ENSRNOG000000025497 | Fbxl6      |
| P-STAT5 | 114591033 | 114592872 | 1,26 | ENSRNOG000000032561 | A3KN99_RAT |
| P-STAT5 | 114660348 | 114660772 | 1,64 | ENSRNOG000000030705 | Cpsf1      |
| P-STAT5 | 114662143 | 114662472 | 2,01 | ENSRNOG000000030705 | Cpsf1      |
| P-STAT5 | 114746798 | 114747647 | 1,89 | ENSRNOG000000033915 | Gpt        |
| P-STAT5 | 114746798 | 114747647 | 1,89 | ENSRNOG000000015685 | Mfsd3      |
| P-STAT5 | 114953440 | 114954990 | 1,07 | ENSRNOG000000004497 | Rpl8       |
| P-STAT5 | 115623391 | 115623744 | 1,51 | ENSRNOG000000042771 | Apol3      |
| P-STAT5 | 116501901 | 116502440 | 1,64 | ENSRNOG000000007332 | Sstr3      |
| P-STAT5 | 117421966 | 117422805 | 1,13 | ENSRNOG000000013076 | Csnk1e     |

|         |           |           |      |                     |             |
|---------|-----------|-----------|------|---------------------|-------------|
| P-STAT5 | 117565436 | 117565695 | 1,7  | ENSRNOG00000013577  | Kdelr3      |
| P-STAT5 | 118578509 | 118578948 | 1,7  | ENSRNOG00000029914  | Cacna1i     |
| P-STAT5 | 120623582 | 120624036 | 1,7  | ENSRNOG00000023262  | Cenpm       |
| P-STAT5 | 120623582 | 120624036 | 1,7  | ENSRNOG00000043197  | LOC688613   |
| P-STAT5 | 120764612 | 120765944 | 1,19 | ENSRNOG00000029128  | Cyp2d5      |
| P-STAT5 | 120775321 | 120776243 | 1,7  | ENSRNOG00000030182  | Cyp2d1      |
| P-STAT5 | 121122735 | 121123433 | 1,51 | ENSRNOG00000022932  | Serhl2      |
| P-STAT5 | 121593003 | 121593651 | 1,45 | ENSRNOG00000010549  | Tspo        |
| P-STAT5 | 121597044 | 121597683 | 1,7  | ENSRNOG00000010549  | Tspo        |
| P-STAT5 | 122116157 | 122117191 | 0,94 | ENSRNOG00000022296  | Pnpla5      |
| P-STAT5 | 122172545 | 122172808 | 1,89 | ENSRNOG00000011952  | Samm50      |
| P-STAT5 | 122219117 | 122219386 | 1,7  | ENSRNOG00000011633  | Parvb       |
| P-STAT5 | 127632564 | 127633413 | 1,13 | ENSRNOG00000008694  | Miox        |
| P-STAT5 | 127632564 | 127633413 | 1,13 | ENSRNOG000000034788 | U6          |
| P-STAT5 | 127671156 | 127671615 | 1,51 | ENSRNOG000000032394 | Tymp        |
| P-STAT5 | 136995700 | 136996549 | 1,51 | ENSRNOG000000029545 | H1fmt       |
| P-STAT5 | 137163750 | 137164723 | 1,32 | ENSRNOG000000010787 | Olr1107     |
| P-STAT5 | 138440556 | 138441496 | 1,13 | ENSRNOG000000034268 | Smarcd1     |
| P-STAT5 | 139685926 | 139686410 | 1,7  | ENSRNOG000000005309 | Scn8a       |
| P-STAT5 | 140193121 | 140193730 | 1,89 | ENSRNOG000000008242 | RGD1305207  |
| P-STAT5 | 140287183 | 140287632 | 1,57 | ENSRNOG000000008819 | Krt84       |
| P-STAT5 | 140317743 | 140318609 | 1,51 | ENSRNOG000000009105 | Kb15        |
| P-STAT5 | 140328796 | 140329460 | 1,38 | ENSRNOG000000043203 | K2C75_RAT   |
| P-STAT5 | 140507221 | 140507690 | 1,76 | ENSRNOG000000009563 | Krt2        |
| P-STAT5 | 140545118 | 140545972 | 1,45 | ENSRNOG000000028996 | Krt1        |
| P-STAT5 | 140593057 | 140593491 | 1,57 | ENSRNOG000000031785 | Krt76       |
| P-STAT5 | 140841345 | 140842715 | 1,19 | ENSRNOG000000010588 | Tenc1       |
| P-STAT5 | 141072457 | 141073291 | 1,51 | ENSRNOG000000012985 | Pfdn5       |
| P-STAT5 | 142348578 | 142349262 | 1,19 | ENSRNOG000000036830 | RGD1563200  |
| P-STAT5 | 142348578 | 142349262 | 1,19 | ENSRNOG000000036829 | Nckap1l     |
| P-STAT5 | 11071775  | 11072551  | 2,23 | ENSRNOG000000008173 | Sesn3       |
| P-STAT5 | 11395740  | 11396374  | 1,55 | ENSRNOG000000008990 | Amotl1      |
| P-STAT5 | 11575299  | 11576264  | 1,48 | ENSRNOG000000009203 | RGD1561795  |
| P-STAT5 | 11646994  | 11647923  | 1,67 | ENSRNOG000000030318 | Gpr83       |
| P-STAT5 | 13283235  | 13283579  | 1,48 | ENSRNOG000000011585 | Fat3        |
| P-STAT5 | 18098416  | 18099185  | 1,73 | ENSRNOG000000026232 | Olr1158     |
| P-STAT5 | 30931158  | 30931492  | 1,48 | ENSRNOG000000005903 | St14        |
| P-STAT5 | 38016303  | 38016847  | 1,85 | ENSRNOG000000031896 | Stt3a       |
| P-STAT5 | 41682637  | 41683456  | 1,42 | ENSRNOG000000031526 | Olr1295     |
| P-STAT5 | 42711442  | 42711801  | 1,48 | ENSRNOG000000030329 | Olr1320     |
| P-STAT5 | 47084320  | 47084969  | 1,36 | ENSRNOG000000039107 | Mfrp        |
| P-STAT5 | 47084320  | 47084969  | 1,36 | ENSRNOG000000007613 | C1qtnf5     |
| P-STAT5 | 48269604  | 48270238  | 1,3  | ENSRNOG000000016397 | Tmprss13    |
| P-STAT5 | 48324386  | 48324720  | 1,48 | ENSRNOG000000016412 | Fxyd6       |
| P-STAT5 | 52725517  | 52725846  | 1,48 | ENSRNOG000000025037 | Ankk1       |
| P-STAT5 | 54205604  | 54205953  | 1,48 | ENSRNOG000000031736 | RGD1561984  |
| P-STAT5 | 54205604  | 54205953  | 1,48 | ENSRNOG000000010922 | Ppp2r1b     |
| P-STAT5 | 56104025  | 56104474  | 1,73 | ENSRNOG000000025463 | LOC10012536 |
| P-STAT5 | 61375500  | 61375960  | 1,61 | ENSRNOG000000019355 | Lman1l      |

|         |           |           |      |                    |             |
|---------|-----------|-----------|------|--------------------|-------------|
| P-STAT5 | 68313476  | 68314020  | 1,73 | ENSRNOG00000009193 | Lctl        |
| P-STAT5 | 71015679  | 71016045  | 1,79 | ENSRNOG00000017766 | Car12       |
| P-STAT5 | 71142681  | 71143520  | 1,17 | ENSRNOG00000027295 | Aph1b       |
| P-STAT5 | 74206709  | 74207167  | 1,55 | ENSRNOG00000010547 | Foxb1       |
| P-STAT5 | 80168629  | 80169656  | 1,36 | ENSRNOG00000009308 | Bcl2l10     |
| P-STAT5 | 87952805  | 87953450  | 1,11 | ENSRNOG00000008984 | Irak1bp1    |
| P-STAT5 | 93711052  | 93712091  | 1,36 | ENSRNOG00000011348 | Snx14       |
| P-STAT5 | 94631406  | 94631764  | 1,98 | ENSRNOG00000013937 | Ankrd34c    |
| P-STAT5 | 105442999 | 105443748 | 1,3  | ENSRNOG00000015370 | Tmem22<sup> |
| P-STAT5 | 107329112 | 107330458 | 1,05 | ENSRNOG00000007865 | Ephb1       |
| P-STAT5 | 108012011 | 108012566 | 1,55 | ENSRNOG00000009005 | Slco2a1     |
| P-STAT5 | 111588649 | 111589221 | 1,36 | ENSRNOG00000012073 | Abhd14b     |
| P-STAT5 | 111635620 | 111636104 | 1,48 | ENSRNOG00000037289 | Iqcf1       |
| P-STAT5 | 111818093 | 111818454 | 1,48 | ENSRNOG00000042065 | RGD1562645  |
| P-STAT5 | 112797958 | 112798512 | 1,98 | ENSRNOG00000021548 | Rassf1      |
| P-STAT5 | 113216597 | 113217239 | 1,36 | ENSRNOG00000030101 | Traip       |
| P-STAT5 | 113561098 | 113561437 | 1,48 | ENSRNOG00000043447 | RGD1562301  |
| P-STAT5 | 113603041 | 113603397 | 1,61 | ENSRNOG00000031965 | Impdh2      |
| P-STAT5 | 113742122 | 113742576 | 1,55 | ENSRNOG00000031401 | LOC679586   |
| P-STAT5 | 113742122 | 113742576 | 1,55 | ENSRNOG00000020284 | Prkar2a     |
| P-STAT5 | 114003009 | 114004189 | 0,93 | ENSRNOG00000020655 | Ucn2        |
| P-STAT5 | 114793159 | 114794709 | 0,99 | ENSRNOG00000024330 | Ngp         |
| P-STAT5 | 115140022 | 115140596 | 1,67 | ENSRNOG00000020955 | MyI3        |
| P-STAT5 | 115141347 | 115141782 | 1,85 | ENSRNOG00000020955 | MyI3        |
| P-STAT5 | 115506729 | 115507774 | 1,67 | ENSRNOG00000021047 | Lrrfip2     |
| P-STAT5 | 124119438 | 124120002 | 1,55 | ENSRNOG00000032908 | THIKB_RAT   |
| P-STAT5 | 124406941 | 124408131 | 1,11 | ENSRNOG00000014801 | Exog        |
| P-STAT5 | 126369694 | 126370651 | 1,17 | ENSRNOG00000019262 | RGD1307844  |
| P-STAT5 | 127027166 | 127028095 | 1,79 | ENSRNOG00000044749 | 7SK         |
| P-STAT5 | 127141998 | 127142362 | 1,48 | ENSRNOG00000019404 | Hhatl       |
| P-STAT5 | 8064532   | 8065866   | 1,31 | ENSRNOG00000013578 | Trem2       |
| P-STAT5 | 8282272   | 8283401   | 1,94 | ENSRNOG00000042054 | RGD1565959  |
| P-STAT5 | 9065275   | 9065834   | 1,38 | ENSRNOG00000015623 | Guca1b      |
| P-STAT5 | 10053382  | 10054386  | 1,75 | ENSRNOG00000017495 | Klhdc3      |
| P-STAT5 | 10055024  | 10055576  | 1,94 | ENSRNOG00000017495 | Klhdc3      |
| P-STAT5 | 10215938  | 10216167  | 1,44 | ENSRNOG00000018863 | Abcc10      |
| P-STAT5 | 10216931  | 10217145  | 1,94 | ENSRNOG00000018863 | Abcc10      |
| P-STAT5 | 33175143  | 33175682  | 1,38 | ENSRNOG00000013285 | Imp4        |
| P-STAT5 | 42236903  | 42237872  | 1,31 | ENSRNOG00000016446 | Gpr45       |
| P-STAT5 | 56945070  | 56946365  | 1,19 | ENSRNOG00000033923 | Q5QE78_RAT  |
| P-STAT5 | 57082169  | 57082520  | 1,69 | ENSRNOG00000025768 | Clk1        |
| P-STAT5 | 57657655  | 57658184  | 1,81 | ENSRNOG00000012637 | Als2cr11    |
| P-STAT5 | 72402418  | 72402679  | 1,94 | ENSRNOG00000017611 | Tnp1        |
| P-STAT5 | 74416766  | 74417615  | 1,81 | ENSRNOG00000018266 | Slc23a3     |
| P-STAT5 | 74724310  | 74724859  | 1,56 | ENSRNOG00000019985 | Accn4       |
| P-STAT5 | 82091359  | 82091793  | 1,5  | ENSRNOG00000015460 | Tm4sf20     |
| P-STAT5 | 84198822  | 84199326  | 1,94 | ENSRNOG00000017072 | Slc16a14    |
| P-STAT5 | 85920575  | 85921114  | 1,56 | ENSRNOG00000019375 | Akp3        |
| P-STAT5 | 85996161  | 85997113  | 1,31 | ENSRNOG00000019527 | Chrnd       |

|         |           |           |      |                    |            |
|---------|-----------|-----------|------|--------------------|------------|
| P-STAT5 | 86330220  | 86330582  | 1,56 | ENSRNOG00000016653 | Ngef       |
| P-STAT5 | 86758986  | 86759746  | 1,63 | ENSRNOG00000018185 | Sag        |
| P-STAT5 | 87295918  | 87296367  | 1,94 | ENSRNOG00000019224 | SPP24_RAT  |
| P-STAT5 | 90712404  | 90712858  | 1,75 | ENSRNOG00000024468 | Traf3ip1   |
| P-STAT5 | 91717771  | 91718910  | 1,06 | ENSRNOG00000034098 | Olr1345    |
| P-STAT5 | 91797103  | 91797931  | 1,69 | ENSRNOG00000030424 | Olr1350    |
| P-STAT5 | 91840326  | 91841175  | 1,94 | ENSRNOG00000037403 | Olr1353    |
| P-STAT5 | 92411947  | 92412499  | 1,31 | ENSRNOG00000023856 | Agxt       |
| P-STAT5 | 92655286  | 92655830  | 1,56 | ENSRNOG00000023427 | Ano7       |
| P-STAT5 | 92966324  | 92966893  | 1,63 | ENSRNOG00000018214 | Bok        |
| P-STAT5 | 108513246 | 108513781 | 1,63 | ENSRNOG00000016719 | Zfp161     |
| P-STAT5 | 7725782   | 7726237   | 1,9  | ENSRNOG00000034040 | Rnf113a1   |
| P-STAT5 | 7725782   | 7726237   | 1,9  | ENSRNOG00000040005 | Ndufa1     |
| P-STAT5 | 7990739   | 7992002   | 1,39 | ENSRNOG00000039985 | Ube2a      |
| P-STAT5 | 7990739   | 7992002   | 1,39 | ENSRNOG00000012564 | RGD1564541 |
| P-STAT5 | 12915993  | 12916422  | 1,52 | ENSRNOG00000008578 | CDK16_RAT  |
| P-STAT5 | 25068850  | 25069102  | 2,09 | ENSRNOG00000021452 | RGD1563155 |
| P-STAT5 | 26817079  | 26818414  | 1,84 | ENSRNOG00000009733 | Praf2      |
| P-STAT5 | 26904569  | 26905022  | 1,84 | ENSRNOG00000010223 | Syp        |
| P-STAT5 | 28066883  | 28067555  | 1,52 | ENSRNOG00000003085 | Mycs       |
| P-STAT5 | 56423927  | 56424781  | 1,33 | ENSRNOG00000004322 | Sh3kbp1    |
| P-STAT5 | 63918271  | 63918711  | 1,52 | ENSRNOG00000038403 | LOC367808  |
| P-STAT5 | 79043792  | 79044046  | 1,39 | ENSRNOG00000003110 | Mageb5     |
| P-STAT5 | 81019408  | 81020413  | 1,14 | ENSRNOG00000012358 | Pcyt1b     |
| P-STAT5 | 82516266  | 82517168  | 1,9  | ENSRNOG00000033197 | RGD1565657 |
| P-STAT5 | 83102565  | 83102953  | 1,52 | ENSRNOG00000004197 | Asb12      |
| P-STAT5 | 85946430  | 85946884  | 1,58 | ENSRNOG00000005639 | Ar         |
| P-STAT5 | 87086287  | 87086732  | 1,58 | ENSRNOG00000033883 | Stard8     |
| P-STAT5 | 88589879  | 88590629  | 1,58 | ENSRNOG00000002953 | P2ry4      |
| P-STAT5 | 94353504  | 94353953  | 2,41 | ENSRNOG00000002453 | Taf9b      |
| P-STAT5 | 122269051 | 122269500 | 1,58 | ENSRNOG00000025705 | Armxcx2    |
| P-STAT5 | 152668142 | 152668676 | 1,65 | ENSRNOG00000011562 | Slitrk2    |
| P-STAT5 | 158334123 | 158334557 | 1,96 | ENSRNOG00000016533 | Gabre      |
| P-STAT5 | 159380424 | 159380853 | 1,58 | ENSRNOG00000017440 | Bgn        |

lik  
lik













rik





›m1Mwi</i></sup>





lik































sb-T2/Bart3)2.264Mwi</sup>



.ik



>m1M*cwi*</i></sup>

[sb-T2/Bart3)2.205Mwi</sup>



rik



























.ik

.













>m1M*cwi*</i></sup>































>m2M*cwi*</i></sup>  
>m2M*cwi*</i></sup>





























up>m1M*ci*</i></sup>





























›m2M*ci*<sup></i></sup></sup>

>m1M*ci*<sup></i></sup></sup>















up>m1M*ci*</i></sup>











Rik











›Tn(sb-T2/Bart3)2.332Mwi</sup>
